# Supplementary material
Source: Research Square preprint supplement (doi:10.21203/rs.3.rs-6230128/v1)
Supplement: Supplementary file 1 [file 6f206cfebab4de6fbf3f3d53.xlsx]

## Sheet: Sheet3
Date	Team	Score	Opponent_score	Score_difference	Outcome	2-pt field goals made	2-pt field goals attempted	2-pt field goals missed	2-pt field goals, %	3-pt field goals made	3-pt field goals attempted	3-pt field goals missed	3-pt field goals, %	Free throws made	Free throws attempted	Free throws missed	Free throws, %	Uncontested field goals made	Uncontested field goals	Uncontested field goals missed	Uncontested field goals, %	Contested field goals made	Contested field goals	Contested field goals missed	Contested field goals, %	Offensive rebounds	Defensive rebounds	Defensive rebounds, %	Offensive rebounds, %	Assists	Steals	Turnovers	Blocks	Fouls	Fouls drawn	Transitions made	Transitions attempted	Catch and shoot made	Catch and shoot attempted	Catch and drive made	Catch and drive attempted	Drives made	Drives with shot	Screens off made	Screens off attempted	Posts up made	Posts up attempted	Isolations made	Isolations attempted
2019-01-01	xinjiang	130	126	4	win	33	56	23	0.589	16	34	18	0.471	16	24	8	0.667	15	36	21	0.417	28	48	20	0.583	15	31	0.756	0.366	22	8	17	3	29	24	10	17	6	13	2	6	13	21	3	7	2	4	2	4
2019-01-01	tianjin	109	101	8	win	27	54	27	0.5	16	33	17	0.485	7	11	4	0.636	12	17	5	0.706	30	69	39	0.435	8	28	0.824	0.211	24	9	12	3	22	17	6	15	11	23	5	7	9	15	2	3	0	2	11	17
2019-01-01	sichuan	99	113	-14	lose	26	43	17	0.605	6	33	27	0.182	29	37	8	0.784	9	29	20	0.31	20	44	24	0.455	13	29	0.69	0.325	25	6	12	3	18	29	7	11	7	29	6	13	8	14	0	1	3	4	1	1
2019-01-01	shenzhen	121	105	16	win	32	53	21	0.604	12	30	18	0.4	21	25	4	0.84	4	4	0	1	40	79	39	0.506	5	32	0.696	0.147	23	12	6	1	22	21	9	12	9	16	4	10	13	28	2	3	3	5	4	4
2019-01-01	shanxi	101	109	-8	lose	23	40	17	0.575	10	26	16	0.385	25	34	9	0.735	12	19	7	0.632	20	46	26	0.435	6	30	0.789	0.176	26	7	12	4	17	22	6	8	10	19	1	4	7	12	0	3	4	4	3	10
2019-01-01	qingdao	105	121	-16	lose	34	65	31	0.523	9	21	12	0.429	10	18	8	0.556	0	0	0	0	39	82	43	0.476	14	29	0.853	0.304	15	5	15	4	21	22	3	4	7	15	4	7	17	33	0	4	3	6	3	10
2019-01-01	nanjing	101	115	-14	lose	23	47	24	0.489	12	33	21	0.364	19	23	4	0.826	4	16	12	0.25	29	62	33	0.468	7	26	0.703	0.163	15	6	10	5	17	20	5	7	5	13	0	7	10	25	0	0	1	2	5	13
2019-01-01	liaoning	89	86	3	win	27	50	23	0.54	5	23	18	0.217	20	25	5	0.8	2	3	1	0.667	29	69	40	0.42	10	29	0.784	0.256	17	9	14	1	21	21	4	8	6	17	6	12	10	20	0	3	1	6	2	5
2019-01-01	jiangsu	93	118	-25	lose	28	53	25	0.528	8	27	19	0.296	13	17	4	0.765	2	5	3	0.4	31	72	41	0.431	11	27	0.711	0.289	19	7	21	2	26	21	2	6	10	22	4	13	10	21	1	3	2	5	1	1
2019-01-01	guangzhou	113	99	14	win	29	54	25	0.537	14	33	19	0.424	13	14	1	0.929	6	9	3	0.667	33	74	41	0.446	13	27	0.675	0.31	24	8	12	3	29	18	6	11	9	17	2	5	8	16	0	3	4	7	6	12
2019-01-01	guangsha	118	93	25	win	35	51	16	0.686	8	28	20	0.286	24	29	5	0.828	2	5	3	0.4	40	73	33	0.548	11	27	0.711	0.289	28	14	14	4	21	26	7	9	13	33	3	7	8	15	0	1	4	4	0	0
2019-01-01	guangdong	126	130	-4	lose	42	69	27	0.609	8	22	14	0.364	18	23	5	0.783	14	28	14	0.5	31	58	27	0.534	10	26	0.634	0.244	24	6	10	2	24	29	11	21	8	16	8	13	23	30	2	3	2	2	6	7
2019-01-01	fujian	115	101	14	win	38	60	22	0.633	10	25	15	0.4	9	11	2	0.818	5	11	6	0.455	43	74	31	0.581	11	36	0.837	0.297	17	6	10	3	20	17	4	6	4	12	6	12	13	21	2	2	9	14	7	10
2019-01-01	beijing	86	89	-3	lose	21	41	20	0.512	10	30	20	0.333	14	18	4	0.778	3	8	5	0.375	26	61	35	0.426	8	29	0.744	0.216	24	9	17	1	21	21	4	5	6	20	4	10	7	14	3	9	1	2	1	3
2020-01-01	zhejiang	126	110	16	win	20	39	19	0.513	21	42	21	0.5	23	28	5	0.821	3	5	2	0.6	38	76	38	0.5	8	32	0.653	0.205	24	4	10	2	28	20	3	5	11	20	5	8	12	26	2	3	0	0	7	20
2020-01-01	shenzhen	104	132	-28	lose	24	50	26	0.48	10	26	16	0.385	26	32	6	0.813	4	8	4	0.5	26	64	38	0.406	13	22	0.733	0.317	25	7	18	1	23	28	4	13	6	12	4	7	6	18	2	3	0	2	1	3
2020-01-01	shanghai	110	126	-16	lose	33	64	31	0.516	6	23	17	0.261	26	38	12	0.684	2	7	5	0.286	33	76	43	0.434	17	31	0.795	0.347	24	8	8	2	21	28	14	16	4	17	3	8	4	14	2	4	4	10	1	7
2020-01-01	liaoning	111	103	8	win	35	53	18	0.66	5	24	19	0.208	26	35	9	0.743	2	8	6	0.25	32	63	31	0.508	4	34	0.829	0.118	23	11	16	2	19	26	8	11	6	22	4	9	8	19	1	4	0	1	6	9
2020-01-01	jiangsu	103	111	-8	lose	28	56	28	0.5	12	31	19	0.387	11	13	2	0.846	2	8	6	0.25	35	76	41	0.461	7	30	0.882	0.171	18	10	15	3	26	19	4	10	7	17	4	6	9	18	2	5	2	5	3	8
2020-01-01	guangdong	132	104	28	win	29	48	19	0.604	19	34	15	0.559	17	19	2	0.895	7	8	1	0.875	36	69	33	0.522	8	28	0.683	0.267	33	10	13	5	28	23	18	22	7	13	0	4	8	14	3	5	1	3	4	10
2021-01-01	zhejiang	99	109	-10	lose	29	64	35	0.453	6	27	21	0.222	23	30	7	0.767	6	17	11	0.353	27	72	45	0.375	21	27	0.844	0.396	14	11	15	3	36	24	10	17	4	14	2	7	9	22	3	5	0	1	2	2
2021-01-01	tianjin	108	114	-6	lose	28	46	18	0.609	9	25	16	0.36	25	37	12	0.676	7	17	10	0.412	25	49	24	0.51	16	25	0.676	0.444	24	5	24	1	35	31	3	5	7	17	4	7	4	11	1	2	5	9	0	0
2021-01-01	jilin	114	108	6	win	29	52	23	0.558	7	23	16	0.304	35	43	8	0.814	4	18	14	0.222	29	54	25	0.537	12	20	0.556	0.324	18	13	10	6	31	35	7	12	4	11	2	5	11	16	1	3	2	5	8	13
2021-01-01	beijing	109	99	10	win	25	45	20	0.556	9	23	14	0.391	32	39	7	0.821	9	19	10	0.474	23	47	24	0.489	5	32	0.604	0.156	19	11	17	10	24	36	4	6	5	16	3	8	7	13	3	3	0	1	1	2
2022-01-01	tianjin	84	105	-21	lose	21	45	24	0.467	10	38	28	0.263	12	15	3	0.8	6	19	13	0.316	24	63	39	0.381	12	23	0.548	0.25	22	9	15	0	20	19	7	9	6	26	2	6	4	9	1	6	1	3	0	5
2022-01-01	nanjing	94	118	-24	lose	25	54	29	0.463	12	38	26	0.316	8	14	6	0.571	1	11	10	0.091	33	78	45	0.423	12	32	0.615	0.245	24	8	22	4	23	19	11	21	5	17	2	5	1	8	1	3	2	3	0	4
2022-01-01	liaoning	115	95	20	win	35	68	33	0.515	10	23	13	0.435	15	21	6	0.714	1	1	0	1	41	87	46	0.471	15	28	0.737	0.385	21	11	9	6	21	19	8	12	5	10	3	7	10	18	1	2	4	9	2	5
2022-01-01	guangsha	105	84	21	win	29	57	28	0.509	11	26	15	0.423	14	17	3	0.824	2	10	8	0.2	35	70	35	0.5	19	36	0.75	0.452	31	10	19	4	19	20	6	9	5	16	3	9	5	11	5	7	0	4	1	1
2022-01-01	guangdong	95	115	-20	lose	22	41	19	0.537	11	32	21	0.344	18	21	3	0.857	0	3	3	0	30	67	37	0.448	10	24	0.615	0.263	21	7	17	6	19	21	7	13	9	26	4	8	2	4	0	1	0	1	0	0
2022-01-01	fujian	118	94	24	win	34	66	32	0.515	10	31	21	0.323	20	23	3	0.87	2	7	5	0.286	41	89	48	0.461	20	37	0.755	0.385	21	15	17	2	19	23	13	25	6	13	2	10	11	19	0	1	0	0	4	6
2019-01-02	zhejiang	82	73	9	win	23	46	23	0.5	7	23	16	0.304	15	24	9	0.625	4	12	8	0.333	24	55	31	0.436	11	33	0.733	0.289	21	6	19	1	20	26	4	5	5	15	1	7	5	13	0	3	1	4	2	2
2019-01-02	shanghai	109	122	-13	lose	33	54	21	0.611	9	28	19	0.321	16	19	3	0.842	4	13	9	0.308	34	65	31	0.523	5	22	0.537	0.156	19	3	10	3	13	18	9	13	5	11	5	9	11	21	2	3	0	2	3	7
2019-01-02	shandong	73	82	-9	lose	30	61	31	0.492	3	18	15	0.167	4	13	9	0.308	3	6	3	0.5	29	72	43	0.403	12	27	0.711	0.267	17	9	13	4	26	20	5	15	3	8	3	6	6	15	3	5	6	14	1	3
2019-01-02	ningbo	102	76	26	win	29	61	32	0.475	7	27	20	0.259	23	26	3	0.885	3	12	9	0.25	33	76	43	0.434	22	31	0.756	0.449	24	10	11	4	20	20	7	14	6	23	4	10	9	17	0	3	1	4	0	0
2019-01-02	jilin	122	109	13	win	40	67	27	0.597	9	24	15	0.375	15	21	6	0.714	6	16	10	0.375	40	72	32	0.556	19	27	0.844	0.463	25	7	11	3	18	13	12	15	6	16	3	9	12	19	0	2	1	2	4	11
2019-01-02	beikong	76	102	-26	lose	23	54	31	0.426	6	19	13	0.316	12	17	5	0.706	4	8	4	0.5	24	64	40	0.375	10	27	0.551	0.244	9	6	16	5	20	20	4	11	4	10	4	10	8	20	0	2	4	11	3	5
2020-01-02	xinjiang	120	111	9	win	33	57	24	0.579	11	32	21	0.344	21	25	4	0.84	9	20	11	0.45	33	67	34	0.493	13	34	0.895	0.302	27	6	11	1	21	23	8	11	11	28	4	10	17	27	2	3	1	5	2	4
2020-01-02	tianjin	82	115	-33	lose	21	50	29	0.42	8	24	16	0.333	16	22	6	0.727	6	20	14	0.3	22	53	31	0.415	10	28	0.757	0.238	15	8	17	1	26	21	2	3	3	15	2	5	8	17	2	6	0	4	4	9
2020-01-02	sichuan	111	120	-9	lose	22	44	22	0.5	14	33	19	0.424	25	28	3	0.893	4	6	2	0.667	32	71	39	0.451	4	30	0.698	0.105	21	4	10	4	23	21	5	6	10	18	4	12	12	26	0	2	1	4	1	8
2020-01-02	shanxi	124	114	10	win	26	43	17	0.605	15	36	21	0.417	27	37	10	0.73	4	6	2	0.667	32	68	36	0.471	12	31	0.886	0.333	21	6	8	4	16	28	2	3	11	20	2	6	8	14	2	4	1	3	11	22
2020-01-02	shandong	94	82	12	win	25	43	18	0.581	9	32	23	0.281	17	20	3	0.85	0	9	9	0	33	65	32	0.508	7	32	0.711	0.184	14	10	13	5	19	20	8	9	3	18	1	3	4	9	1	5	6	9	7	11
2020-01-02	qingdao	93	104	-11	lose	19	49	30	0.388	11	33	22	0.333	22	31	9	0.71	8	21	13	0.381	21	60	39	0.35	15	24	0.571	0.326	20	6	6	3	25	30	5	13	7	15	2	9	9	21	0	0	1	5	4	10
2020-01-02	ningbo	82	94	-12	lose	21	52	31	0.404	9	25	16	0.36	13	20	7	0.65	4	7	3	0.571	25	69	44	0.362	13	31	0.816	0.289	14	5	19	1	20	19	2	3	8	23	1	6	5	16	0	0	1	7	4	12
2020-01-02	jilin	104	93	11	win	25	52	27	0.481	12	33	21	0.364	18	23	5	0.783	12	30	18	0.4	23	53	30	0.434	18	31	0.674	0.429	25	2	13	4	30	25	4	7	7	21	6	10	13	27	1	2	2	3	5	15
2020-01-02	guangzhou	114	124	-10	lose	26	47	21	0.553	15	32	17	0.469	17	22	5	0.773	2	9	7	0.222	38	69	31	0.551	4	24	0.667	0.114	17	4	6	2	28	16	4	7	7	13	2	3	14	23	1	3	2	3	11	19
2020-01-02	guangsha	113	120	-7	lose	37	69	32	0.536	8	37	29	0.216	15	21	6	0.714	2	11	9	0.182	42	94	52	0.447	23	26	0.619	0.404	21	12	5	2	23	22	11	16	9	24	1	3	11	38	1	6	2	4	0	3
2020-01-02	fujian	120	113	7	win	26	50	24	0.52	18	35	17	0.514	14	22	8	0.636	9	15	6	0.6	32	67	35	0.478	16	34	0.596	0.381	23	2	20	4	22	23	4	5	10	23	3	4	22	37	2	5	1	1	5	6
2020-01-02	beijing	115	82	33	win	32	54	22	0.593	11	25	14	0.44	18	24	6	0.75	7	19	12	0.368	30	54	24	0.556	9	32	0.762	0.243	35	4	8	6	21	26	6	9	7	19	3	6	5	12	4	7	0	3	3	5
2021-01-02	xinjiang	95	132	-37	lose	21	45	24	0.467	8	28	20	0.286	29	45	16	0.644	5	15	10	0.333	17	51	34	0.333	7	25	0.61	0.159	20	9	24	0	30	36	7	11	3	14	3	7	5	12	1	5	5	11	2	5
2021-01-02	sichuan	102	122	-20	lose	33	59	26	0.559	6	17	11	0.353	18	23	5	0.783	5	15	10	0.333	33	60	27	0.55	11	27	0.844	0.367	26	6	15	2	21	25	7	11	4	9	3	5	3	9	2	4	6	13	1	3
2021-01-02	shanghai	122	102	20	win	29	44	15	0.659	18	36	18	0.5	10	10	0	1	14	26	12	0.538	32	53	21	0.604	5	19	0.633	0.156	22	8	11	3	25	21	5	10	8	10	4	7	8	12	2	5	0	0	4	8
2021-01-02	nanjing	100	113	-13	lose	28	53	25	0.528	5	21	16	0.238	29	34	5	0.853	2	6	4	0.333	28	65	37	0.431	16	27	0.75	0.421	23	6	20	7	31	24	5	8	3	14	2	5	6	10	1	1	4	8	0	5
2021-01-02	guangsha	113	100	13	win	27	53	26	0.509	10	21	11	0.476	29	35	6	0.829	4	10	6	0.4	30	61	31	0.492	9	22	0.579	0.25	25	11	12	5	24	31	3	11	10	18	3	7	9	15	1	3	5	9	0	1
2021-01-02	guangdong	132	95	37	win	43	68	25	0.632	7	21	14	0.333	25	32	7	0.781	2	8	6	0.25	46	79	33	0.582	16	37	0.841	0.39	23	16	15	2	36	30	15	20	2	10	1	3	11	16	4	6	1	1	6	10
2022-01-02	zhejiang	113	86	27	win	30	57	27	0.526	8	25	17	0.32	29	40	11	0.725	3	7	4	0.429	29	69	40	0.42	13	32	0.711	0.317	26	10	13	7	27	33	13	18	5	12	2	5	6	13	1	7	1	3	3	6
2022-01-02	xinjiang	109	103	6	win	34	67	33	0.507	7	24	17	0.292	20	25	5	0.8	1	4	3	0.25	38	85	47	0.447	17	22	0.71	0.347	33	12	10	5	22	23	10	13	9	18	4	8	6	11	1	4	2	7	0	3
2022-01-02	sichuan	103	109	-6	lose	34	56	22	0.607	6	19	13	0.316	17	19	2	0.895	0	0	0	0	37	72	35	0.514	9	32	0.653	0.29	32	4	25	5	23	22	7	12	2	9	3	7	7	13	6	8	9	18	1	2
2022-01-02	shenzhen	103	106	-3	lose	35	60	25	0.583	7	25	18	0.28	12	16	4	0.75	3	11	8	0.273	35	70	35	0.5	12	37	0.787	0.286	22	7	11	5	24	18	12	17	3	14	2	7	5	9	1	3	3	6	4	10
2022-01-02	shanxi	118	112	6	win	33	60	27	0.55	10	28	18	0.357	22	28	6	0.786	3	9	6	0.333	35	74	39	0.473	9	36	0.818	0.205	23	8	9	1	20	28	8	13	7	15	4	10	12	23	2	5	1	1	4	11
2022-01-02	shandong	86	113	-27	lose	29	65	36	0.446	4	17	13	0.235	16	24	8	0.667	2	4	2	0.5	28	75	47	0.373	13	28	0.683	0.289	16	8	18	8	33	27	10	14	2	9	1	3	3	14	3	6	5	9	0	4
2022-01-02	qingdao	100	80	20	win	34	64	30	0.531	8	22	14	0.364	8	9	1	0.889	2	8	6	0.25	39	77	38	0.506	8	30	0.682	0.211	25	15	16	7	32	13	9	17	7	14	5	9	5	15	4	5	2	6	2	7
2022-01-02	jilin	106	103	3	win	30	58	28	0.517	8	23	15	0.348	22	31	9	0.71	5	12	7	0.417	28	64	36	0.438	10	30	0.714	0.213	18	4	7	2	18	24	7	13	7	16	4	6	6	14	2	2	3	7	3	12
2022-01-02	jiangsu	84	90	-6	lose	21	50	29	0.42	7	29	22	0.241	21	27	6	0.778	1	9	8	0.111	26	69	43	0.377	16	27	0.771	0.348	19	8	15	2	28	23	3	9	9	21	1	8	3	10	1	9	2	5	0	1
2022-01-02	guangzhou	90	84	6	win	25	45	20	0.556	6	24	18	0.25	22	29	7	0.759	1	2	1	0.5	26	63	37	0.413	8	30	0.652	0.229	20	6	15	5	23	28	2	5	6	23	5	8	4	10	0	1	5	9	1	3
2022-01-02	beikong	80	100	-20	lose	23	56	33	0.411	5	16	11	0.313	19	34	15	0.559	4	13	9	0.308	20	55	35	0.364	14	30	0.789	0.318	19	6	25	6	13	32	5	12	2	6	2	4	5	9	2	4	2	4	1	4
2022-01-02	beijing	112	118	-6	lose	24	47	23	0.511	15	37	22	0.405	19	23	4	0.826	11	18	7	0.611	28	66	38	0.424	8	35	0.795	0.182	30	7	14	4	28	20	9	13	10	22	2	8	2	10	0	2	2	2	1	5
2019-01-03	xinjiang	100	89	11	win	30	55	25	0.545	6	21	15	0.286	22	31	9	0.71	0	3	3	0	33	70	37	0.471	15	40	0.702	0.395	24	8	20	1	23	28	10	19	5	11	4	5	8	13	1	4	2	8	1	1
2019-01-03	tianjin	110	102	8	win	32	53	21	0.604	11	35	24	0.314	13	15	2	0.867	3	9	6	0.333	38	77	39	0.494	12	34	0.895	0.343	21	5	13	4	27	20	3	10	13	29	1	5	14	21	4	4	1	2	8	12
2019-01-03	sichuan	116	123	-7	lose	29	43	14	0.674	10	32	22	0.313	28	33	5	0.848	7	12	5	0.583	31	62	31	0.5	8	26	0.722	0.222	23	7	11	3	22	23	4	6	9	26	4	8	8	11	0	1	2	2	7	15
2019-01-03	shenzhen	123	116	7	win	35	57	22	0.614	10	28	18	0.357	23	30	7	0.767	2	7	5	0.286	39	74	35	0.527	10	28	0.778	0.278	24	7	9	2	23	22	9	14	6	18	6	11	13	22	0	0	2	4	2	11
2019-01-03	shanxi	107	101	6	win	29	56	27	0.518	9	23	14	0.391	22	25	3	0.88	6	16	10	0.375	30	61	31	0.492	11	30	0.652	0.297	19	3	11	3	30	21	8	11	6	16	3	10	7	21	0	1	2	4	2	5
2019-01-03	qingdao	101	107	-6	lose	24	52	28	0.462	9	30	21	0.3	26	35	9	0.743	7	20	13	0.35	24	60	36	0.4	16	26	0.703	0.348	10	6	14	1	21	30	11	17	5	15	0	3	7	17	0	4	0	2	1	9
2019-01-03	nanjing	102	110	-8	lose	23	42	19	0.548	11	34	23	0.324	23	28	5	0.821	1	9	8	0.111	30	64	34	0.469	4	23	0.657	0.105	16	6	7	8	20	27	9	17	5	18	6	8	9	20	0	0	0	3	2	4
2019-01-03	guangzhou	89	100	-11	lose	14	44	30	0.318	15	43	28	0.349	16	24	8	0.667	0	4	4	0	24	78	54	0.308	17	23	0.605	0.298	17	11	17	2	28	23	7	12	9	30	2	7	7	17	0	1	0	4	1	2
2019-01-03	guangsha	110	93	17	win	19	37	18	0.514	12	32	20	0.375	36	47	11	0.766	11	31	20	0.355	20	38	18	0.526	8	24	0.667	0.19	22	17	8	3	26	33	4	9	11	29	1	5	8	17	2	4	2	2	1	1
2019-01-03	beijing	93	110	-17	lose	23	45	22	0.511	7	25	18	0.28	26	29	3	0.897	7	24	17	0.292	14	37	23	0.378	12	34	0.81	0.333	19	2	22	2	33	26	5	8	3	11	1	4	7	17	3	5	0	1	3	7
2020-01-03	zhejiang	115	99	16	win	15	34	19	0.441	19	47	28	0.404	28	42	14	0.667	11	35	24	0.314	20	43	23	0.465	5	37	0.755	0.114	17	9	9	1	27	36	6	11	8	21	1	4	4	11	1	5	0	1	4	11
2020-01-03	shenzhen	106	75	31	win	34	56	22	0.607	8	27	19	0.296	14	20	6	0.7	0	1	1	0	38	78	40	0.487	9	31	0.721	0.231	19	18	9	4	22	20	12	16	4	18	1	3	9	22	1	5	1	3	6	10
2020-01-03	shanghai	106	111	-5	lose	34	69	35	0.493	4	14	10	0.286	26	33	7	0.788	13	15	2	0.867	24	67	43	0.358	14	25	0.61	0.326	27	13	12	1	24	30	14	17	5	13	0	6	4	10	0	0	2	9	1	2
2020-01-03	nanjing	111	106	5	win	31	48	17	0.646	10	35	25	0.286	19	27	8	0.704	10	17	7	0.588	26	61	35	0.426	16	29	0.674	0.39	23	8	20	7	30	24	7	13	5	24	2	4	8	9	1	1	1	1	3	7
2020-01-03	liaoning	95	105	-10	lose	30	62	32	0.484	7	29	22	0.241	14	17	3	0.824	3	17	14	0.176	33	73	40	0.452	15	28	0.8	0.333	21	12	14	2	20	18	7	11	4	22	3	8	8	19	2	3	2	6	1	5
2020-01-03	jiangsu	99	115	-16	lose	23	55	32	0.418	9	24	15	0.375	26	36	10	0.722	7	20	13	0.35	23	57	34	0.404	12	39	0.886	0.245	18	3	15	2	36	27	4	6	8	17	1	8	6	19	1	4	2	8	3	7
2020-01-03	guangdong	105	95	10	win	27	45	18	0.6	13	33	20	0.394	12	17	5	0.706	9	16	7	0.563	28	59	31	0.475	7	30	0.667	0.2	19	6	16	8	18	20	8	13	6	10	2	5	9	15	0	3	0	4	1	2
2020-01-03	beikong	75	106	-31	lose	18	51	33	0.353	9	23	14	0.391	12	14	2	0.857	1	6	5	0.167	21	63	42	0.333	12	30	0.769	0.279	11	5	26	5	20	22	4	7	12	23	0	0	3	13	0	3	1	8	3	10
2021-01-03	zhejiang	116	129	-13	lose	35	71	36	0.493	4	21	17	0.19	34	41	7	0.829	3	12	9	0.25	29	73	44	0.397	18	19	0.679	0.409	19	10	18	1	38	32	7	16	4	7	1	4	4	9	0	3	2	4	1	2
2021-01-03	tianjin	96	99	-3	lose	27	57	30	0.474	7	31	24	0.226	21	26	5	0.808	3	11	8	0.273	27	73	46	0.37	17	29	0.744	0.333	16	6	14	5	29	23	3	3	9	26	5	12	5	12	1	5	7	14	2	5
2021-01-03	shenzhen	116	93	23	win	34	54	20	0.63	12	30	18	0.4	12	20	8	0.6	7	16	9	0.438	38	67	29	0.567	7	32	0.821	0.212	24	10	13	7	23	19	11	15	3	13	3	4	10	11	4	6	1	5	3	4
2021-01-03	shanxi	93	116	-23	lose	27	55	28	0.491	8	19	11	0.421	15	24	9	0.625	6	9	3	0.667	27	63	36	0.429	7	26	0.788	0.179	23	5	22	3	19	23	3	4	6	11	4	7	6	12	4	10	6	12	3	8
2021-01-03	shandong	89	86	3	win	22	42	20	0.524	5	22	17	0.227	30	36	6	0.833	6	13	7	0.462	19	49	30	0.388	12	27	0.75	0.324	20	13	21	2	21	27	6	9	3	9	3	9	4	11	2	3	1	2	0	3
2021-01-03	qingdao	90	103	-13	lose	25	53	28	0.472	9	36	27	0.25	13	20	7	0.65	5	19	14	0.263	26	67	41	0.388	11	32	0.78	0.212	11	12	19	3	34	25	3	9	3	16	2	7	10	19	2	2	2	6	8	13
2021-01-03	liaoning	129	116	13	win	33	55	22	0.6	8	14	6	0.571	39	45	6	0.867	7	16	9	0.438	29	48	19	0.604	9	26	0.591	0.321	27	8	19	5	32	38	8	14	5	13	2	6	5	6	3	5	0	2	2	3
2021-01-03	jilin	117	110	7	win	32	52	20	0.615	11	28	17	0.393	20	32	12	0.625	4	16	12	0.25	35	60	25	0.583	11	31	0.816	0.268	21	4	10	1	18	23	7	9	2	8	3	5	8	16	2	3	6	10	9	15
2021-01-03	jiangsu	103	90	13	win	23	50	27	0.46	10	27	17	0.37	27	34	7	0.794	12	26	14	0.462	19	49	30	0.388	9	41	0.788	0.22	17	10	20	7	25	34	10	15	4	13	2	8	4	10	2	7	2	5	2	3
2021-01-03	fujian	110	117	-7	lose	29	47	18	0.617	13	35	22	0.371	13	20	7	0.65	9	19	10	0.474	31	61	30	0.508	7	30	0.732	0.184	20	4	7	1	23	18	6	10	10	22	1	6	6	12	2	4	6	9	5	10
2021-01-03	beikong	99	96	3	win	26	49	23	0.531	7	19	12	0.368	26	34	8	0.765	5	10	5	0.5	24	54	30	0.444	10	34	0.667	0.256	19	6	16	3	23	29	4	7	3	8	4	8	10	16	1	3	0	3	2	5
2021-01-03	beijing	86	89	-3	lose	22	41	19	0.537	8	30	22	0.267	18	19	1	0.947	9	26	17	0.346	20	44	24	0.455	9	25	0.676	0.25	18	9	21	4	27	21	5	9	6	14	5	10	4	12	0	2	0	2	0	5
2022-01-03	shanghai	119	85	34	win	39	72	33	0.542	7	18	11	0.389	20	25	5	0.8	5	11	6	0.455	37	75	38	0.493	18	32	0.696	0.409	28	17	12	4	20	22	17	22	6	13	6	15	7	22	2	2	3	8	1	3
2022-01-03	ningbo	85	119	-34	lose	28	59	31	0.475	5	23	18	0.217	14	18	4	0.778	4	15	11	0.267	27	65	38	0.415	14	26	0.591	0.304	21	7	25	10	22	20	4	5	3	11	2	9	4	13	1	7	4	7	0	3
2022-01-03	nanjing	86	101	-15	lose	20	56	36	0.357	10	30	20	0.333	16	20	4	0.8	10	25	15	0.4	20	61	41	0.328	21	18	0.667	0.404	19	14	19	1	23	21	4	13	3	17	3	7	4	8	1	4	0	3	3	8
2022-01-03	guangsha	109	84	25	win	33	51	18	0.647	13	32	19	0.406	4	8	4	0.5	10	22	12	0.455	36	61	25	0.59	13	34	0.773	0.371	32	5	17	3	20	13	6	10	9	17	3	6	2	5	3	5	4	6	0	3
2022-01-03	guangdong	101	86	15	win	32	55	23	0.582	6	11	5	0.545	19	21	2	0.905	2	7	5	0.286	31	54	23	0.574	9	31	0.596	0.333	29	8	28	8	21	23	6	7	5	10	1	1	6	11	5	6	4	7	0	2
2022-01-03	fujian	84	109	-25	lose	32	63	31	0.508	4	22	18	0.182	8	15	7	0.533	1	6	5	0.167	34	78	44	0.436	10	22	0.629	0.227	18	12	7	4	13	20	7	12	2	10	6	11	7	16	2	2	0	0	1	6
2019-01-04	zhejiang	104	93	11	win	26	45	19	0.578	9	31	22	0.29	25	28	3	0.893	1	3	2	0.333	30	69	39	0.435	8	30	0.714	0.242	17	8	9	4	26	24	7	9	5	15	1	4	9	16	1	8	0	0	9	17
2019-01-04	shanghai	106	126	-20	lose	24	54	30	0.444	9	23	14	0.391	31	42	11	0.738	11	26	15	0.423	17	46	29	0.37	10	22	0.55	0.227	15	6	18	2	27	31	5	12	8	17	3	8	9	25	1	4	3	5	4	11
2019-01-04	shandong	97	132	-35	lose	22	55	33	0.4	12	29	17	0.414	17	28	11	0.607	10	26	16	0.385	22	56	34	0.393	10	25	0.694	0.196	13	5	15	4	25	27	9	18	7	22	1	4	5	14	0	2	1	4	5	12
2019-01-04	ningbo	87	117	-30	lose	28	59	31	0.475	3	18	15	0.167	22	31	9	0.71	7	27	20	0.259	21	47	26	0.447	12	27	0.73	0.267	5	0	11	2	23	30	7	7	3	15	1	2	8	18	1	1	6	12	0	1
2019-01-04	liaoning	119	87	32	win	27	53	26	0.509	14	30	16	0.467	23	28	5	0.821	6	17	11	0.353	31	62	31	0.5	16	34	0.68	0.4	20	9	11	4	20	26	5	10	10	19	6	9	10	16	2	2	2	2	4	9
2019-01-04	jilin	93	104	-11	lose	25	50	25	0.5	8	27	19	0.296	19	22	3	0.864	1	2	1	0.5	28	71	43	0.394	12	25	0.758	0.286	15	7	17	3	24	26	8	11	9	23	2	5	4	14	2	7	3	6	4	11
2019-01-04	jiangsu	126	106	20	win	40	63	23	0.635	9	28	19	0.321	19	30	11	0.633	5	23	18	0.217	44	68	24	0.647	18	34	0.773	0.45	28	11	15	5	31	27	14	23	8	15	3	8	7	18	0	1	6	8	3	5
2019-01-04	guangdong	132	97	35	win	40	67	27	0.597	9	19	10	0.474	25	35	10	0.714	9	16	7	0.563	38	68	30	0.559	11	41	0.804	0.306	27	7	11	3	27	25	14	19	8	17	4	10	9	17	1	1	1	4	1	1
2019-01-04	fujian	117	87	30	win	38	64	26	0.594	5	19	14	0.263	26	29	3	0.897	8	19	11	0.421	30	59	29	0.508	10	33	0.733	0.27	12	4	2	4	30	23	7	13	4	11	3	5	8	13	1	1	2	11	3	7
2019-01-04	beikong	87	119	-32	lose	26	59	33	0.441	9	25	16	0.36	8	15	7	0.533	7	19	12	0.368	27	64	37	0.422	16	24	0.6	0.32	18	8	16	1	26	20	10	12	5	22	4	7	5	10	0	0	1	2	1	7
2020-01-04	tianjin	82	119	-37	lose	32	55	23	0.582	3	35	32	0.086	9	13	4	0.692	2	19	17	0.105	29	67	38	0.433	17	20	0.69	0.34	15	7	16	2	23	24	5	9	3	21	1	4	5	14	2	8	3	6	2	4
2020-01-04	shanxi	101	106	-5	lose	21	38	17	0.553	14	41	27	0.341	17	27	10	0.63	1	5	4	0.2	33	73	40	0.452	11	32	0.744	0.268	22	10	17	4	25	25	3	5	13	36	2	3	5	8	0	0	0	0	9	22
2020-01-04	shandong	112	75	37	win	27	43	16	0.628	13	29	16	0.448	19	22	3	0.864	6	9	3	0.667	33	62	29	0.532	8	32	0.744	0.25	30	8	11	7	23	20	12	14	8	15	2	4	3	10	2	5	3	7	3	6
2020-01-04	qingdao	114	89	25	win	25	51	26	0.49	11	29	18	0.379	31	42	11	0.738	4	7	3	0.571	29	70	41	0.414	17	34	0.694	0.395	18	12	13	3	26	29	9	18	5	16	2	9	7	15	1	2	2	2	4	9
2020-01-04	ningbo	89	114	-25	lose	23	59	36	0.39	7	24	17	0.292	22	30	8	0.733	2	6	4	0.333	24	73	49	0.329	15	26	0.605	0.306	20	8	16	5	29	26	3	8	9	24	4	15	7	26	0	1	1	2	2	9
2020-01-04	jilin	119	82	37	win	31	49	18	0.633	12	24	12	0.5	21	24	3	0.875	6	10	4	0.6	35	61	26	0.574	9	33	0.66	0.31	26	9	17	3	24	23	8	11	9	14	3	4	8	14	1	3	5	8	2	11
2020-01-04	fujian	106	101	5	win	27	58	31	0.466	11	25	14	0.44	19	23	4	0.826	1	5	4	0.2	34	75	41	0.453	11	30	0.732	0.256	19	11	15	2	25	25	3	7	5	14	2	9	4	12	0	0	2	4	12	24
2020-01-04	beijing	75	112	-37	lose	21	46	25	0.457	6	26	20	0.231	15	26	11	0.577	2	7	5	0.286	23	63	40	0.365	11	24	0.75	0.256	19	7	14	4	20	23	4	6	5	17	5	9	5	17	2	5	1	3	3	13
2022-01-04	zhejiang	102	90	12	win	26	51	25	0.51	8	23	15	0.348	26	31	5	0.839	2	5	3	0.4	32	69	37	0.464	11	25	0.61	0.306	22	8	17	10	29	28	4	9	4	11	6	10	9	13	3	8	0	2	4	4
2022-01-04	xinjiang	92	89	3	win	27	49	22	0.551	7	21	14	0.333	17	21	4	0.81	6	14	8	0.429	24	52	28	0.462	9	38	0.792	0.29	28	5	21	5	21	22	9	14	3	11	0	0	1	5	3	8	6	14	3	4
2022-01-04	sichuan	110	103	7	win	27	49	22	0.551	7	22	15	0.318	35	40	5	0.875	1	2	1	0.5	31	67	36	0.463	8	36	0.837	0.242	31	6	16	3	24	32	2	6	7	17	1	8	3	9	1	2	4	8	0	4
2022-01-04	shenzhen	80	93	-13	lose	22	46	24	0.478	9	31	22	0.29	9	12	3	0.75	1	7	6	0.143	28	68	40	0.412	8	30	0.638	0.182	13	9	13	2	12	15	8	17	4	14	5	9	4	8	0	3	1	4	4	7
2022-01-04	qingdao	89	92	-3	lose	23	48	25	0.479	9	30	21	0.3	16	28	12	0.571	3	11	8	0.273	26	64	38	0.406	10	22	0.71	0.208	23	13	11	4	22	21	12	20	1	11	3	8	4	9	2	6	3	6	1	2
2022-01-04	liaoning	93	80	13	win	18	45	27	0.4	16	39	23	0.41	9	13	4	0.692	4	7	3	0.571	27	74	47	0.365	17	36	0.818	0.362	28	8	18	4	15	12	3	6	13	23	2	7	1	2	1	7	1	2	0	1
2022-01-04	jilin	76	105	-29	lose	24	55	31	0.436	3	20	17	0.15	19	31	12	0.613	1	6	5	0.167	26	69	43	0.377	14	22	0.579	0.275	17	10	11	5	20	24	2	3	4	12	4	16	8	17	1	4	4	9	1	7
2022-01-04	guangzhou	103	110	-7	lose	22	42	20	0.524	13	37	24	0.351	20	29	9	0.69	2	6	4	0.333	31	71	40	0.437	7	25	0.758	0.163	21	10	12	2	32	24	5	7	6	17	3	6	2	6	1	2	2	4	1	4
2022-01-04	beikong	90	102	-12	lose	31	63	32	0.492	3	16	13	0.188	19	29	10	0.655	4	7	3	0.571	29	71	42	0.408	16	25	0.694	0.39	17	6	20	5	28	29	7	14	2	8	2	6	8	17	2	4	2	9	4	7
2022-01-04	beijing	105	76	29	win	26	50	24	0.52	13	28	15	0.464	14	22	8	0.636	6	12	6	0.5	33	66	33	0.5	16	37	0.725	0.421	27	8	15	8	24	20	6	11	9	21	2	3	5	8	3	5	1	2	3	4
2019-01-05	xinjiang	110	106	4	win	34	62	28	0.548	6	21	15	0.286	24	29	5	0.828	4	5	1	0.8	31	73	42	0.425	14	35	0.714	0.35	27	5	17	6	19	25	4	11	6	14	5	13	13	22	0	3	6	10	0	0
2019-01-05	tianjin	120	110	10	win	24	43	19	0.558	19	43	24	0.442	15	19	4	0.789	14	34	20	0.412	25	48	23	0.521	12	24	0.75	0.3	25	11	11	3	27	23	3	7	16	34	2	2	11	15	1	1	1	1	4	9
2019-01-05	sichuan	110	120	-10	lose	28	48	20	0.583	12	26	14	0.462	18	24	6	0.75	14	24	10	0.583	20	44	24	0.455	8	28	0.7	0.25	26	9	15	2	23	27	11	13	14	24	1	3	6	13	2	3	1	3	3	8
2019-01-05	shenzhen	106	110	-4	lose	27	55	28	0.491	14	37	23	0.378	10	16	6	0.625	2	8	6	0.25	36	81	45	0.444	14	26	0.65	0.286	22	9	14	2	25	19	9	13	13	32	3	9	9	25	1	3	0	0	2	2
2019-01-05	shanxi	118	127	-9	lose	31	57	26	0.544	9	22	13	0.409	29	38	9	0.763	1	3	2	0.333	37	74	37	0.5	14	34	0.756	0.333	13	2	16	1	25	29	9	18	5	17	6	11	9	19	2	2	1	2	3	4
2019-01-05	guangsha	127	118	9	win	34	60	26	0.567	13	35	22	0.371	20	25	5	0.8	4	8	4	0.5	40	84	44	0.476	11	28	0.667	0.244	23	11	5	1	29	25	6	15	13	31	3	8	10	18	1	2	4	8	0	1
2020-01-05	zhejiang	111	120	-9	lose	21	46	25	0.457	14	34	20	0.412	27	38	11	0.711	1	3	2	0.333	32	75	43	0.427	11	24	0.615	0.234	18	8	12	3	28	34	3	7	7	15	2	4	7	24	0	2	0	3	10	31
2020-01-05	xinjiang	120	111	9	win	29	53	24	0.547	10	27	17	0.37	32	38	6	0.842	1	7	6	0.143	36	71	35	0.507	15	36	0.766	0.385	21	7	16	2	34	28	4	9	7	19	3	10	5	16	2	4	3	7	1	3
2020-01-05	sichuan	108	119	-11	lose	25	53	28	0.472	12	35	23	0.343	22	32	10	0.688	3	5	2	0.6	30	79	49	0.38	14	34	0.756	0.304	22	5	12	3	35	31	2	10	10	26	2	4	7	18	0	0	2	4	1	7
2020-01-05	shenzhen	96	90	6	win	30	53	23	0.566	4	26	22	0.154	24	35	11	0.686	3	13	10	0.231	27	62	35	0.435	13	25	0.735	0.283	19	10	14	1	18	31	7	14	0	12	3	5	8	19	2	4	4	5	2	6
2020-01-05	shanghai	96	112	-16	lose	30	53	23	0.566	9	23	14	0.391	9	18	9	0.5	6	12	6	0.5	32	63	31	0.508	11	24	0.6	0.282	18	11	16	1	23	19	13	17	6	16	4	6	7	14	1	4	4	7	2	7
2020-01-05	nanjing	119	111	8	win	25	47	22	0.532	13	29	16	0.448	30	33	3	0.909	12	29	17	0.414	23	44	21	0.523	16	32	0.727	0.444	22	5	14	1	30	27	4	5	8	17	6	14	8	16	2	2	1	2	4	6
2020-01-05	liaoning	103	122	-19	lose	33	58	25	0.569	4	24	20	0.167	25	34	9	0.735	7	10	3	0.7	25	67	42	0.373	14	32	0.681	0.326	18	8	23	1	26	27	3	8	3	19	5	9	8	12	0	0	1	2	9	15
2020-01-05	jiangsu	111	119	-8	lose	28	52	24	0.538	10	27	17	0.37	25	38	13	0.658	14	37	23	0.378	20	38	18	0.526	12	20	0.556	0.273	20	3	7	3	27	30	2	3	5	16	3	9	8	15	0	2	2	6	2	4
2020-01-05	guangzhou	90	96	-6	lose	25	52	27	0.481	9	20	11	0.45	13	13	0	1	1	6	5	0.167	32	65	33	0.492	9	33	0.717	0.265	18	10	22	2	31	18	5	8	6	15	2	3	10	22	0	0	5	12	3	7
2020-01-05	guangsha	122	103	19	win	36	72	36	0.5	9	24	15	0.375	23	29	6	0.793	10	15	5	0.667	32	78	46	0.41	15	29	0.674	0.319	23	14	10	5	27	25	8	15	12	27	2	4	6	11	0	0	1	6	5	9
2020-01-05	guangdong	119	108	11	win	26	48	22	0.542	12	34	22	0.353	31	39	8	0.795	2	6	4	0.333	32	72	40	0.444	11	32	0.696	0.244	18	9	10	8	31	35	10	14	9	25	0	1	8	15	0	1	2	5	5	10
2020-01-05	beikong	112	96	16	win	32	61	29	0.525	9	23	14	0.391	21	23	2	0.913	10	25	15	0.4	28	56	28	0.5	16	28	0.718	0.4	17	11	13	0	19	23	5	11	3	16	2	5	7	14	1	2	5	7	4	9
2022-01-05	shanghai	100	117	-17	lose	28	63	35	0.444	7	28	21	0.25	23	27	4	0.852	2	8	6	0.25	32	82	50	0.39	12	23	0.697	0.245	21	9	16	4	26	24	10	26	3	16	2	7	2	10	0	1	5	7	0	2
2022-01-05	shandong	117	100	17	win	39	59	20	0.661	7	22	15	0.318	18	23	5	0.783	1	5	4	0.2	42	73	31	0.575	10	37	0.755	0.303	22	9	23	2	24	26	10	12	4	12	5	7	12	19	2	3	3	9	5	8
2022-01-05	ningbo	104	102	2	win	22	41	19	0.537	16	32	16	0.5	12	22	10	0.545	1	2	1	0.5	36	70	34	0.514	14	28	0.778	0.424	32	2	19	4	31	29	4	8	15	26	5	7	8	11	1	5	2	6	1	1
2022-01-05	jiangsu	102	104	-2	lose	24	46	22	0.522	9	25	16	0.36	27	33	6	0.818	6	9	3	0.667	26	61	35	0.426	8	19	0.576	0.222	30	12	10	3	29	31	3	7	7	14	1	3	6	13	3	8	4	8	0	0
2019-01-06	zhejiang	95	123	-28	lose	19	55	36	0.345	12	35	23	0.343	21	27	6	0.778	12	31	19	0.387	16	56	40	0.286	19	22	0.71	0.333	14	8	16	6	28	25	4	9	8	16	5	10	12	31	0	2	1	4	1	11
2019-01-06	shanghai	92	104	-12	lose	25	56	31	0.446	7	20	13	0.35	21	29	8	0.724	10	32	22	0.313	21	43	22	0.488	11	24	0.774	0.275	16	8	9	2	13	23	4	8	5	18	8	14	9	18	1	3	2	5	1	5
2019-01-06	shandong	117	89	28	win	34	54	20	0.63	13	28	15	0.464	10	14	4	0.714	12	26	14	0.462	31	52	21	0.596	3	40	0.769	0.088	23	10	8	2	24	21	10	12	9	18	6	10	10	17	1	2	2	2	7	11
2019-01-06	qingdao	98	91	7	win	24	49	25	0.49	6	21	15	0.286	32	38	6	0.842	7	21	14	0.333	23	49	26	0.469	12	28	0.583	0.3	15	4	7	8	18	29	8	16	3	9	1	4	5	13	2	3	5	9	1	6
2019-01-06	ningbo	91	98	-7	lose	26	63	37	0.413	7	24	17	0.292	18	22	4	0.818	9	26	17	0.346	23	60	37	0.383	20	28	0.7	0.417	16	4	11	2	29	18	7	14	7	23	2	2	7	13	1	6	5	14	3	3
2019-01-06	nanjing	84	90	-6	lose	29	50	21	0.58	6	32	26	0.188	8	12	4	0.667	1	9	8	0.111	32	71	39	0.451	11	25	0.658	0.297	22	10	17	3	16	17	7	10	4	18	2	11	5	19	1	1	0	1	4	5
2019-01-06	liaoning	123	95	28	win	30	55	25	0.545	10	19	9	0.526	33	38	5	0.868	12	23	11	0.522	27	50	23	0.54	9	38	0.667	0.29	25	10	17	4	25	28	9	12	10	15	3	5	9	22	2	3	2	5	1	6
2019-01-06	jilin	110	97	13	win	30	44	14	0.682	11	36	25	0.306	17	20	3	0.85	10	24	14	0.417	27	52	25	0.519	12	28	0.683	0.333	21	5	10	2	17	21	10	13	7	25	4	7	9	14	1	3	3	5	1	3
2019-01-06	jiangsu	105	142	-37	lose	30	53	23	0.566	8	21	13	0.381	21	33	12	0.636	6	10	4	0.6	30	62	32	0.484	7	19	0.487	0.189	23	8	25	4	31	24	6	15	4	10	7	10	6	14	0	2	0	3	0	3
2019-01-06	guangzhou	90	84	6	win	22	47	25	0.468	12	31	19	0.387	10	10	0	1	4	6	2	0.667	28	70	42	0.4	13	26	0.703	0.342	30	10	19	5	17	16	6	11	10	18	3	8	5	13	1	3	0	5	1	5
2019-01-06	guangdong	142	105	37	win	44	75	31	0.587	10	19	9	0.526	24	37	13	0.649	3	8	5	0.375	46	81	35	0.568	20	30	0.811	0.513	33	15	15	3	24	31	11	13	8	16	5	10	9	21	3	3	3	6	2	4
2019-01-06	fujian	89	117	-28	lose	16	48	32	0.333	12	35	23	0.343	21	27	6	0.778	6	18	12	0.333	20	63	43	0.317	12	31	0.912	0.231	16	4	13	3	21	24	2	3	9	29	3	8	5	14	0	0	2	7	4	12
2019-01-06	beikong	97	110	-13	lose	25	51	26	0.49	10	25	15	0.4	17	22	5	0.773	10	21	11	0.476	23	53	30	0.434	13	24	0.667	0.317	19	2	10	1	21	17	3	8	5	14	6	10	10	22	2	3	4	8	4	10
2019-01-06	beijing	104	92	12	win	33	52	19	0.635	9	20	11	0.45	11	13	2	0.846	16	31	15	0.516	25	40	15	0.625	7	29	0.725	0.226	27	5	12	6	23	13	4	9	3	12	2	6	7	11	2	2	1	4	5	5
2022-01-06	tianjin	121	101	20	win	37	55	18	0.673	11	30	19	0.367	14	19	5	0.737	3	8	5	0.375	42	74	32	0.568	11	36	0.766	0.306	27	15	15	4	25	21	14	20	3	13	5	8	8	13	2	5	0	0	4	5
2022-01-06	sichuan	78	93	-15	lose	20	54	34	0.37	3	18	15	0.167	29	36	7	0.806	2	10	8	0.2	20	61	41	0.328	13	31	0.674	0.283	20	6	19	7	21	28	3	5	1	8	3	9	5	19	1	2	4	13	2	8
2022-01-06	shenzhen	84	118	-34	lose	30	57	27	0.526	1	11	10	0.091	21	27	6	0.778	1	5	4	0.2	25	58	33	0.431	10	22	0.71	0.278	19	8	18	3	16	25	7	12	1	4	3	6	3	12	1	3	2	6	1	7
2022-01-06	shanxi	96	111	-15	lose	22	44	22	0.5	11	38	27	0.289	19	23	4	0.826	3	8	5	0.375	26	70	44	0.371	9	27	0.675	0.196	21	11	13	4	30	22	6	14	7	16	4	8	8	15	0	2	0	0	1	6
2022-01-06	qingdao	97	108	-11	lose	22	47	25	0.468	10	31	21	0.323	23	28	5	0.821	3	11	8	0.273	26	64	38	0.406	9	28	0.778	0.22	30	7	15	3	27	25	7	10	8	21	4	13	5	11	2	5	3	5	0	5
2022-01-06	nanjing	101	121	-20	lose	27	55	28	0.491	9	26	17	0.346	20	30	10	0.667	4	9	5	0.444	29	69	40	0.42	11	25	0.694	0.234	23	8	17	3	21	25	7	13	4	16	6	12	5	11	0	1	0	1	1	4
2022-01-06	jilin	110	99	11	win	34	65	31	0.523	10	28	18	0.357	12	20	8	0.6	4	9	5	0.444	38	82	44	0.463	15	30	0.789	0.313	27	10	6	6	16	23	11	19	4	11	1	3	5	10	2	5	4	8	4	8
2022-01-06	guangzhou	108	97	11	win	24	49	25	0.49	10	24	14	0.417	30	34	4	0.882	6	11	5	0.545	25	59	34	0.424	8	32	0.78	0.222	28	7	15	7	25	27	4	10	8	17	2	6	6	8	1	2	1	3	3	6
2022-01-06	guangsha	118	84	34	win	28	45	17	0.622	17	35	18	0.486	11	14	3	0.786	9	13	4	0.692	32	63	31	0.508	9	26	0.722	0.29	36	13	12	2	25	16	4	8	12	22	4	5	6	8	4	4	1	4	0	5
2022-01-06	guangdong	111	96	15	win	32	56	24	0.571	8	21	13	0.381	23	31	8	0.742	1	3	2	0.333	34	69	35	0.493	13	37	0.804	0.325	30	7	16	4	22	30	8	11	4	10	4	8	7	11	3	4	3	8	0	2
2022-01-06	fujian	99	110	-11	lose	23	45	22	0.511	13	32	19	0.406	14	17	3	0.824	3	4	1	0.75	33	73	40	0.452	8	33	0.688	0.211	18	3	18	3	23	16	5	11	8	15	5	8	2	7	1	4	0	0	2	5
2022-01-06	beikong	93	78	15	win	29	63	34	0.46	8	23	15	0.348	11	17	6	0.647	4	20	16	0.2	32	65	33	0.492	15	33	0.717	0.326	17	11	14	5	28	21	10	11	3	15	3	9	5	12	1	2	6	13	2	7
2020-01-07	zhejiang	90	93	-3	lose	27	61	34	0.443	5	29	24	0.172	21	24	3	0.875	0	1	1	0	32	89	57	0.36	18	30	0.625	0.346	16	9	10	1	30	20	5	15	1	10	2	8	11	25	0	2	1	3	6	19
2020-01-07	xinjiang	88	98	-10	lose	24	45	21	0.533	10	43	33	0.233	10	18	8	0.556	7	17	10	0.412	23	67	44	0.343	14	37	0.787	0.28	22	10	23	4	24	26	7	18	7	30	2	5	4	12	3	9	1	2	0	3
2020-01-07	sichuan	117	98	19	win	29	57	28	0.509	9	25	16	0.36	32	37	5	0.865	0	2	2	0	34	76	42	0.447	12	33	0.717	0.279	23	8	12	1	25	29	1	7	10	25	2	3	4	9	0	0	9	18	2	7
2020-01-07	shenzhen	100	122	-22	lose	33	62	29	0.532	1	17	16	0.059	31	35	4	0.886	6	26	20	0.231	23	48	25	0.479	8	22	0.846	0.174	13	7	11	1	22	25	5	11	1	11	4	10	10	22	3	3	2	3	3	5
2020-01-07	shanxi	93	90	3	win	22	54	32	0.407	5	23	18	0.217	34	45	11	0.756	1	2	1	0.5	25	74	49	0.338	18	34	0.654	0.375	10	4	15	6	20	30	6	11	3	10	1	5	8	20	1	4	1	11	4	12
2020-01-07	shanghai	77	84	-7	lose	26	57	31	0.456	6	19	13	0.316	7	15	8	0.467	6	17	11	0.353	25	58	33	0.431	9	19	0.633	0.225	20	10	12	2	20	22	7	9	5	11	3	11	8	23	1	3	0	5	0	6
2020-01-07	shandong	102	107	-5	lose	27	44	17	0.614	13	43	30	0.302	9	12	3	0.75	4	8	4	0.5	36	79	43	0.456	7	31	0.721	0.149	23	7	8	5	22	19	13	18	6	24	3	8	6	12	3	7	4	6	1	4
2020-01-07	qingdao	116	101	15	win	32	52	20	0.615	12	37	25	0.324	16	22	6	0.727	12	18	6	0.667	28	67	39	0.418	14	33	0.825	0.311	27	7	9	2	22	26	8	11	12	30	3	7	3	7	0	2	2	5	3	12
2020-01-07	ningbo	107	114	-7	lose	29	56	27	0.518	9	24	15	0.375	22	31	9	0.71	7	17	10	0.412	24	56	32	0.429	13	27	0.75	0.333	19	4	13	3	21	24	6	9	3	17	6	11	12	24	2	3	0	0	2	4
2020-01-07	nanjing	98	117	-19	lose	30	48	18	0.625	5	38	33	0.132	23	29	6	0.793	0	7	7	0	30	74	44	0.405	13	31	0.721	0.283	16	5	13	2	29	25	2	4	5	29	3	7	12	20	1	2	2	4	3	12
2020-01-07	liaoning	122	100	22	win	30	45	15	0.667	13	26	13	0.5	23	27	4	0.852	11	19	8	0.579	31	51	20	0.608	4	38	0.826	0.154	31	7	16	3	25	22	8	8	11	16	3	3	8	11	0	1	1	2	1	8
2020-01-07	jilin	114	107	7	win	34	54	20	0.63	9	29	20	0.31	19	22	3	0.864	5	12	7	0.417	30	63	33	0.476	9	26	0.667	0.25	23	9	10	5	24	21	12	16	5	18	5	6	12	21	2	5	2	4	7	14
2020-01-07	guangzhou	105	121	-16	lose	27	45	18	0.6	13	33	20	0.394	12	19	7	0.632	1	4	3	0.25	36	71	35	0.507	8	27	0.692	0.216	29	8	14	2	27	18	8	10	11	25	2	3	5	7	0	1	2	9	4	5
2020-01-07	guangsha	98	88	10	win	31	59	28	0.525	8	28	20	0.286	12	19	7	0.632	4	10	6	0.4	34	76	42	0.447	10	36	0.72	0.213	17	12	15	4	26	24	11	18	5	14	2	5	8	19	1	3	1	3	4	8
2020-01-07	guangdong	107	102	5	win	23	48	25	0.479	13	37	24	0.351	22	25	3	0.88	7	14	7	0.5	27	69	42	0.391	12	40	0.851	0.279	24	7	12	2	19	22	13	24	8	17	0	0	5	12	2	3	0	2	1	6
2020-01-07	fujian	101	116	-15	lose	21	47	26	0.447	15	32	17	0.469	14	15	1	0.933	3	9	6	0.333	32	69	37	0.464	7	31	0.689	0.175	19	5	12	3	26	22	2	3	9	17	2	9	4	8	1	2	1	1	2	13
2020-01-07	beikong	121	105	16	win	24	45	21	0.533	15	32	17	0.469	28	33	5	0.848	1	4	3	0.25	34	69	35	0.493	12	29	0.784	0.308	19	8	11	5	18	27	6	12	10	24	1	3	4	9	1	4	4	7	3	6
2020-01-07	beijing	84	77	7	win	25	49	24	0.51	4	13	9	0.308	22	29	7	0.759	5	15	10	0.333	21	44	23	0.477	11	31	0.775	0.367	24	9	20	11	22	20	3	6	5	14	2	5	6	16	0	2	2	3	3	6
2021-01-07	xinjiang	119	106	13	win	42	57	15	0.737	4	14	10	0.286	23	42	19	0.548	3	13	10	0.231	37	52	15	0.712	12	27	0.551	0.353	36	14	15	4	22	32	6	10	3	8	4	7	9	11	0	4	15	18	1	1
2021-01-07	tianjin	106	119	-13	lose	33	63	30	0.524	10	30	20	0.333	10	11	1	0.909	7	22	15	0.318	33	68	35	0.485	22	22	0.647	0.449	27	9	16	2	32	22	7	11	7	21	5	9	11	15	5	9	0	6	1	2
2021-01-07	sichuan	111	97	14	win	29	52	23	0.558	8	19	11	0.421	29	41	12	0.707	4	7	3	0.571	28	59	31	0.475	10	42	0.84	0.263	24	7	16	6	22	28	6	7	6	14	0	6	5	12	2	3	5	8	5	9
2021-01-07	shenzhen	112	103	9	win	20	39	19	0.513	15	37	22	0.405	27	36	9	0.75	8	20	12	0.4	27	56	29	0.482	9	25	0.694	0.237	21	8	9	2	25	26	8	13	7	17	2	4	3	5	3	7	1	2	3	6
2021-01-07	shanxi	87	124	-37	lose	24	50	26	0.48	5	20	15	0.25	24	35	11	0.686	1	4	3	0.25	25	63	38	0.397	8	20	0.69	0.205	9	11	20	5	25	30	5	10	0	12	3	5	8	18	2	5	5	8	1	5
2021-01-07	shanghai	98	110	-12	lose	23	46	23	0.5	12	45	33	0.267	16	21	5	0.762	5	18	13	0.278	28	71	43	0.394	19	29	0.644	0.352	19	5	12	4	12	17	3	10	5	23	1	3	5	12	4	8	0	2	4	7
2021-01-07	nanjing	97	111	-14	lose	27	58	31	0.466	8	29	21	0.276	19	25	6	0.76	6	19	13	0.316	24	63	39	0.381	8	28	0.737	0.16	22	10	14	3	28	22	3	4	8	22	2	3	5	11	2	5	3	5	3	7
2021-01-07	liaoning	124	87	37	win	36	56	20	0.643	11	26	15	0.423	19	21	2	0.905	2	5	3	0.4	42	74	32	0.568	9	31	0.795	0.31	30	12	16	2	30	25	9	12	8	18	3	3	10	14	3	6	1	2	2	5
2021-01-07	guangzhou	103	112	-9	lose	28	44	16	0.636	10	36	26	0.278	17	21	4	0.81	5	10	5	0.5	31	68	37	0.456	11	29	0.763	0.306	17	6	17	1	26	25	0	3	5	20	7	8	10	15	3	4	6	9	1	2
2021-01-07	guangsha	101	94	7	win	33	64	31	0.516	1	18	17	0.056	32	35	3	0.914	3	13	10	0.231	27	65	38	0.415	16	33	0.892	0.39	16	7	16	3	24	29	4	8	3	14	3	5	6	13	2	7	7	12	2	4
2021-01-07	fujian	110	98	12	win	31	61	30	0.508	15	36	21	0.417	3	4	1	0.75	10	15	5	0.667	36	82	46	0.439	16	35	0.648	0.356	17	7	10	1	17	12	9	20	4	11	4	8	14	16	2	3	3	6	7	11
2021-01-07	beikong	94	101	-7	lose	31	50	19	0.62	6	24	18	0.25	14	19	5	0.737	4	17	13	0.235	30	54	24	0.556	4	25	0.61	0.108	17	9	18	2	29	24	11	13	3	13	2	6	11	16	2	5	0	1	3	7
2022-01-07	zhejiang	99	64	35	win	26	56	30	0.464	9	26	17	0.346	20	23	3	0.87	5	17	12	0.294	30	65	35	0.462	14	28	0.778	0.341	20	12	12	5	21	20	9	10	6	18	1	8	6	14	2	7	2	5	0	1
2022-01-07	xinjiang	96	121	-25	lose	32	53	21	0.604	4	25	21	0.16	20	29	9	0.69	1	3	2	0.333	32	72	40	0.444	13	27	0.711	0.342	25	10	26	3	19	24	10	16	5	13	1	4	5	9	2	9	3	6	3	6
2022-01-07	shanghai	121	96	25	win	35	58	23	0.603	11	28	17	0.393	18	21	3	0.857	2	9	7	0.222	39	72	33	0.542	11	25	0.658	0.289	28	12	20	2	24	19	18	28	4	12	6	11	7	10	0	0	1	3	6	7
2022-01-07	shandong	105	100	5	win	26	47	21	0.553	11	31	20	0.355	20	26	6	0.769	1	2	1	0.5	32	72	40	0.444	9	23	0.697	0.257	22	11	16	2	22	26	8	14	4	11	4	12	6	12	4	7	1	3	3	6
2022-01-07	ningbo	64	99	-35	lose	23	48	25	0.479	2	16	14	0.125	12	14	2	0.857	4	13	9	0.308	19	49	30	0.388	8	27	0.659	0.222	16	4	24	5	20	21	4	8	3	12	2	5	3	7	0	1	3	8	1	3
2022-01-07	liaoning	103	95	8	win	21	45	24	0.467	16	31	15	0.516	13	18	5	0.722	6	11	5	0.545	29	63	34	0.46	11	29	0.829	0.306	28	11	16	3	18	20	8	13	8	17	3	8	4	9	1	2	2	2	0	4
2022-01-07	jiangsu	100	105	-5	lose	23	42	19	0.548	11	28	17	0.393	21	26	5	0.808	4	7	3	0.571	28	61	33	0.459	10	26	0.743	0.303	22	7	22	3	26	22	2	6	5	12	3	8	5	13	0	2	3	8	0	0
2022-01-07	beijing	95	103	-8	lose	24	49	25	0.49	10	24	14	0.417	17	20	3	0.85	1	4	3	0.25	29	65	36	0.446	6	25	0.694	0.171	26	11	14	6	20	18	7	11	9	16	5	7	1	10	1	3	0	0	1	4
2019-01-08	tianjin	123	128	-5	lose	25	38	13	0.658	18	37	19	0.486	19	24	5	0.792	11	23	12	0.478	28	48	20	0.583	4	27	0.75	0.133	19	3	9	0	23	22	4	7	11	20	2	4	12	17	1	6	0	0	8	14
2019-01-08	qingdao	128	123	5	win	37	62	25	0.597	9	20	11	0.45	27	30	3	0.9	7	18	11	0.389	34	59	25	0.576	9	26	0.867	0.25	23	6	5	4	22	23	10	16	8	15	3	6	8	18	2	3	2	6	3	8
2019-01-08	ningbo	94	96	-2	lose	22	50	28	0.44	13	26	13	0.5	11	16	5	0.688	3	10	7	0.3	30	64	34	0.469	10	29	0.659	0.263	13	6	16	1	21	17	5	11	6	12	3	7	11	32	0	1	5	6	3	8
2019-01-08	liaoning	96	94	2	win	27	53	26	0.509	9	28	19	0.321	15	21	6	0.714	5	13	8	0.385	28	65	37	0.431	15	28	0.737	0.341	15	7	17	6	17	21	7	10	2	8	2	5	6	23	2	4	8	13	1	7
2019-01-08	guangsha	125	77	48	win	38	56	18	0.679	13	33	20	0.394	10	14	4	0.714	3	5	2	0.6	46	82	36	0.561	15	43	0.811	0.469	31	5	11	3	18	20	14	19	12	27	2	5	8	11	0	0	1	3	0	1
2019-01-08	beikong	77	125	-48	lose	21	53	32	0.396	9	32	23	0.281	8	14	6	0.571	1	6	5	0.167	29	79	50	0.367	10	17	0.531	0.189	9	5	9	2	20	18	6	7	6	26	5	12	11	31	0	1	2	2	1	3
2021-01-08	zhejiang	129	110	19	win	26	47	21	0.553	12	40	28	0.3	41	57	16	0.719	7	24	17	0.292	21	53	32	0.396	18	22	0.846	0.353	9	15	15	3	30	43	8	17	4	18	0	2	9	12	0	5	0	1	5	6
2021-01-08	qingdao	75	78	-3	lose	24	48	24	0.5	3	19	16	0.158	18	25	7	0.72	4	16	12	0.25	18	46	28	0.391	7	29	0.879	0.175	15	9	16	1	22	24	3	4	1	10	1	9	11	24	3	4	5	7	2	2
2021-01-08	jilin	111	110	1	win	29	55	26	0.527	10	30	20	0.333	23	26	3	0.885	6	15	9	0.4	31	68	37	0.456	13	33	0.673	0.283	19	7	11	2	27	25	6	12	6	18	2	4	4	10	0	0	1	1	12	20
2021-01-08	jiangsu	110	129	-19	lose	33	57	24	0.579	6	12	6	0.5	26	36	10	0.722	8	13	5	0.615	28	53	25	0.528	4	33	0.647	0.154	20	9	26	6	43	30	16	19	4	9	1	7	3	5	1	1	2	6	2	4
2021-01-08	guangdong	110	111	-1	lose	28	48	20	0.583	12	38	26	0.316	18	29	11	0.621	8	29	21	0.276	27	52	25	0.519	16	33	0.717	0.327	19	6	13	7	25	27	10	17	5	21	6	8	6	10	0	2	1	1	4	9
2021-01-08	beijing	78	75	3	win	25	40	15	0.625	6	23	17	0.261	10	18	8	0.556	8	31	23	0.258	21	30	9	0.7	4	33	0.825	0.121	19	7	17	9	24	22	6	8	8	21	1	4	5	6	2	5	1	1	0	0
2022-01-08	shenzhen	126	110	16	win	32	58	26	0.552	12	30	18	0.4	26	28	2	0.929	7	12	5	0.583	35	74	39	0.473	13	34	0.829	0.333	25	12	19	1	29	24	5	13	8	19	2	4	6	12	3	3	7	8	2	11
2022-01-08	shanxi	110	126	-16	lose	23	50	27	0.46	12	30	18	0.4	28	35	7	0.8	9	15	6	0.6	25	64	39	0.391	7	26	0.667	0.171	22	11	17	5	24	29	11	16	5	15	2	8	6	14	1	1	1	1	2	9
2022-01-08	qingdao	88	94	-6	lose	29	58	29	0.5	5	27	22	0.185	15	20	5	0.75	2	11	9	0.182	28	70	42	0.4	14	22	0.688	0.286	23	11	16	1	30	24	8	14	2	9	2	8	12	16	4	6	2	8	4	6
2022-01-08	nanjing	98	130	-32	lose	25	51	26	0.49	13	36	23	0.361	9	11	2	0.818	4	18	14	0.222	31	66	35	0.47	15	29	0.806	0.341	25	5	22	1	22	19	8	14	9	20	2	13	2	11	0	4	2	2	0	2
2022-01-08	jilin	95	99	-4	lose	23	56	33	0.411	12	35	23	0.343	13	18	5	0.722	0	8	8	0	31	79	48	0.392	15	19	0.576	0.3	14	14	10	1	25	22	7	12	5	17	5	8	7	20	1	4	1	2	3	14
2022-01-08	guangdong	99	95	4	win	31	55	24	0.564	3	9	6	0.333	28	33	5	0.848	2	2	0	1	29	59	30	0.492	14	35	0.7	0.424	18	6	25	5	22	25	4	7	2	4	1	3	5	10	2	3	0	5	0	2
2022-01-08	fujian	130	98	32	win	31	49	18	0.633	17	37	20	0.459	17	22	5	0.773	10	13	3	0.769	36	71	35	0.507	7	29	0.659	0.194	44	15	8	10	19	22	10	14	11	19	5	11	6	11	1	3	0	2	1	3
2022-01-08	beikong	94	88	6	win	34	63	29	0.54	4	12	8	0.333	14	25	11	0.56	4	10	6	0.4	32	63	31	0.508	10	35	0.714	0.313	18	11	19	6	24	30	6	12	1	3	1	3	6	12	1	3	5	8	1	5
2019-01-09	zhejiang	111	105	6	win	31	54	23	0.574	10	31	21	0.323	19	28	9	0.679	8	18	10	0.444	31	65	34	0.477	13	29	0.644	0.295	24	9	12	8	32	25	9	15	10	24	4	11	9	15	1	1	1	3	0	6
2019-01-09	xinjiang	89	115	-26	lose	18	43	25	0.419	7	27	20	0.259	32	36	4	0.889	7	15	8	0.467	17	54	37	0.315	14	31	0.756	0.378	20	8	21	1	21	34	6	19	7	16	2	8	4	11	0	1	2	4	1	2
2019-01-09	sichuan	90	104	-14	lose	24	47	23	0.511	6	33	27	0.182	24	30	6	0.8	2	7	5	0.286	25	70	45	0.357	11	28	0.718	0.224	10	13	14	1	15	28	9	10	2	26	1	8	4	12	1	1	0	0	5	9
2019-01-09	shandong	104	90	14	win	32	54	22	0.593	11	34	23	0.324	7	10	3	0.7	10	17	7	0.588	32	70	38	0.457	11	38	0.776	0.282	27	7	20	1	28	15	5	8	9	28	5	8	4	6	0	1	4	6	1	3
2019-01-09	jiangsu	110	103	7	win	23	43	20	0.535	8	27	19	0.296	40	45	5	0.889	3	5	2	0.6	25	62	37	0.403	10	33	0.688	0.27	22	6	12	5	33	33	8	8	6	20	5	9	7	18	2	3	2	5	1	1
2019-01-09	guangzhou	103	110	-7	lose	20	44	24	0.455	9	34	25	0.265	36	40	4	0.9	0	1	1	0	27	75	48	0.36	15	27	0.73	0.313	13	7	10	4	34	33	2	5	7	23	2	6	10	21	0	0	3	7	7	14
2019-01-09	guangdong	115	89	26	win	26	56	30	0.464	13	27	14	0.481	24	26	2	0.923	12	22	10	0.545	25	59	34	0.424	10	23	0.622	0.244	27	16	12	3	34	21	12	19	8	17	4	7	9	19	1	2	1	4	1	5
2019-01-09	fujian	105	111	-6	lose	27	57	30	0.474	8	23	15	0.348	27	33	6	0.818	3	10	7	0.3	29	67	38	0.433	16	31	0.705	0.356	13	8	18	9	25	32	0	5	7	17	5	13	13	28	2	3	6	10	8	16
2020-01-09	zhejiang	118	110	8	win	14	38	24	0.368	18	40	22	0.45	36	43	7	0.837	4	13	9	0.308	25	62	37	0.403	12	30	0.75	0.267	15	6	11	4	35	36	4	7	4	14	1	2	6	16	2	5	0	0	5	13
2020-01-09	sichuan	99	110	-11	lose	24	51	27	0.471	10	35	25	0.286	21	26	5	0.808	7	23	16	0.304	23	59	36	0.39	20	24	0.649	0.426	24	4	13	2	22	23	3	4	9	28	2	4	6	17	1	5	3	10	2	4
2020-01-09	shanxi	110	118	-8	lose	27	44	17	0.614	8	31	23	0.258	32	38	6	0.842	2	5	3	0.4	26	63	37	0.413	10	33	0.733	0.25	14	6	13	3	36	35	3	7	3	11	2	4	11	19	3	5	3	4	5	11
2020-01-09	fujian	110	99	11	win	29	48	19	0.604	11	30	19	0.367	19	26	7	0.731	9	23	14	0.391	31	55	24	0.564	13	27	0.574	0.351	30	5	10	6	23	22	4	5	11	20	3	6	9	15	3	7	1	3	1	2
2021-01-09	tianjin	99	108	-9	lose	17	37	20	0.459	18	40	22	0.45	11	19	8	0.579	10	16	6	0.625	23	59	36	0.39	10	23	0.605	0.238	24	11	25	4	35	22	5	9	13	32	3	5	2	7	3	3	2	6	0	6
2021-01-09	sichuan	108	99	9	win	29	53	24	0.547	6	23	17	0.261	32	40	8	0.8	4	8	4	0.5	29	66	37	0.439	15	32	0.762	0.395	22	11	17	3	22	35	7	10	5	19	1	2	5	13	0	1	4	9	0	1
2021-01-09	shanghai	96	122	-26	lose	19	44	25	0.432	13	40	27	0.325	19	26	7	0.731	5	9	4	0.556	26	74	48	0.351	14	27	0.711	0.286	12	9	12	5	26	23	5	9	8	28	2	6	6	15	0	2	1	7	5	8
2021-01-09	beikong	122	96	26	win	38	58	20	0.655	12	26	14	0.462	10	21	11	0.476	3	7	4	0.429	44	74	30	0.595	11	35	0.714	0.289	26	7	14	5	23	26	8	12	8	16	5	9	13	18	2	4	1	4	6	8
2022-01-09	zhejiang	104	113	-9	lose	19	41	22	0.463	17	37	20	0.459	15	21	6	0.714	6	12	6	0.5	28	64	36	0.438	7	24	0.75	0.184	26	8	17	3	29	25	7	13	7	15	0	7	5	13	7	12	2	4	2	4
2022-01-09	tianjin	88	106	-18	lose	26	48	22	0.542	6	38	32	0.158	18	23	5	0.783	6	19	13	0.316	22	63	41	0.349	17	27	0.587	0.327	16	9	12	2	12	17	13	21	2	19	0	6	0	2	2	6	2	3	0	3
2022-01-09	sichuan	83	94	-11	lose	22	55	33	0.4	5	12	7	0.417	24	29	5	0.828	4	10	6	0.4	23	57	34	0.404	9	35	0.66	0.265	18	8	22	7	22	28	2	6	1	4	2	5	4	11	2	5	7	15	0	1
2022-01-09	shanghai	119	93	26	win	34	69	35	0.493	10	21	11	0.476	21	30	9	0.7	7	13	6	0.538	31	71	40	0.437	14	29	0.707	0.326	25	13	9	2	23	26	12	19	7	14	6	19	5	12	0	0	2	8	1	4
2022-01-09	shandong	94	83	11	win	24	58	34	0.414	12	33	21	0.364	10	17	7	0.588	6	12	6	0.5	28	77	49	0.364	18	25	0.735	0.34	30	12	15	7	28	22	4	11	5	15	3	9	5	12	6	10	1	4	0	1
2022-01-09	ningbo	93	119	-26	lose	25	52	27	0.481	9	28	19	0.321	16	21	5	0.762	6	14	8	0.429	27	65	38	0.415	12	29	0.674	0.293	22	5	18	7	26	23	4	7	9	21	2	4	4	5	0	3	4	10	1	3
2022-01-09	liaoning	106	88	18	win	31	53	22	0.585	11	36	25	0.306	11	16	5	0.688	4	12	8	0.333	33	72	39	0.458	19	35	0.673	0.413	28	6	16	3	17	12	7	8	6	25	2	5	3	6	2	2	2	4	0	1
2022-01-09	guangzhou	113	104	9	win	37	57	20	0.649	6	18	12	0.333	21	31	10	0.677	3	10	7	0.3	36	61	25	0.59	8	31	0.816	0.25	25	10	16	5	25	29	5	7	5	11	5	8	11	17	0	1	3	5	4	9
2022-01-09	guangsha	99	88	11	win	26	48	22	0.542	7	23	16	0.304	26	34	8	0.765	4	6	2	0.667	25	61	36	0.41	10	35	0.833	0.256	24	12	17	6	17	27	4	5	7	16	7	13	8	11	1	3	0	3	1	4
2022-01-09	beijing	88	99	-11	lose	20	48	28	0.417	12	28	16	0.429	12	13	1	0.923	3	11	8	0.273	27	63	36	0.429	7	29	0.744	0.167	19	7	17	4	27	17	5	9	6	13	3	10	2	8	0	3	0	1	3	9
2019-01-10	shenzhen	129	118	11	win	33	51	18	0.647	17	24	7	0.708	12	17	5	0.706	7	11	4	0.636	35	56	21	0.625	4	30	0.682	0.154	24	6	19	4	18	17	8	12	10	12	4	6	12	18	0	1	1	3	4	5
2019-01-10	shanxi	120	103	17	win	28	60	32	0.467	15	29	14	0.517	19	22	3	0.864	15	32	17	0.469	26	55	29	0.473	19	36	0.766	0.422	16	3	13	1	26	19	12	20	4	10	2	4	6	18	2	4	0	9	4	10
2019-01-10	shanghai	103	120	-17	lose	30	56	26	0.536	6	24	18	0.25	25	35	10	0.714	10	27	17	0.37	24	51	27	0.471	11	26	0.578	0.234	16	10	8	0	19	26	9	20	2	9	5	8	8	17	0	0	0	4	1	3
2019-01-10	jilin	118	129	-11	lose	31	57	26	0.544	14	34	20	0.412	14	20	6	0.7	5	15	10	0.333	38	74	36	0.514	14	22	0.846	0.318	30	9	10	5	17	18	9	13	11	22	7	18	9	18	0	0	2	3	4	10
2021-01-10	shenzhen	95	92	3	win	23	49	26	0.469	9	24	15	0.375	22	25	3	0.88	5	10	5	0.5	26	62	36	0.419	10	26	0.722	0.263	16	13	15	4	24	22	4	6	5	10	3	6	5	16	0	1	5	7	1	6
2021-01-10	shanxi	91	94	-3	lose	30	58	28	0.517	4	22	18	0.182	19	22	3	0.864	5	11	6	0.455	26	66	40	0.394	10	34	0.694	0.238	23	11	15	3	25	25	9	11	3	5	4	9	7	10	2	6	4	14	5	7
2021-01-10	shandong	94	91	3	win	29	66	37	0.439	6	21	15	0.286	18	24	6	0.75	5	12	7	0.417	26	71	45	0.366	15	32	0.762	0.306	19	8	17	4	25	25	6	12	7	13	2	4	10	17	1	6	2	6	5	9
2021-01-10	qingdao	94	112	-18	lose	31	51	20	0.608	5	25	20	0.2	17	27	10	0.63	7	25	18	0.28	27	49	22	0.551	13	26	0.788	0.333	19	7	20	9	19	23	8	15	2	13	5	9	9	17	3	6	1	1	1	3
2021-01-10	nanjing	89	108	-19	lose	25	45	20	0.556	9	26	17	0.346	12	14	2	0.857	3	9	6	0.333	31	62	31	0.5	11	27	0.794	0.306	21	8	22	3	24	17	10	11	7	20	2	7	4	6	2	2	2	3	0	2
2021-01-10	liaoning	112	94	18	win	30	53	23	0.566	13	24	11	0.542	13	18	5	0.722	15	29	14	0.517	26	46	20	0.565	7	26	0.667	0.212	26	12	14	3	23	19	11	16	6	14	0	3	5	12	3	5	2	2	0	0
2021-01-10	jilin	108	89	19	win	22	36	14	0.611	14	29	15	0.483	22	30	8	0.733	6	7	1	0.857	24	52	28	0.462	7	25	0.694	0.206	20	12	16	3	17	24	4	7	10	16	3	6	10	17	1	5	0	0	4	9
2021-01-10	jiangsu	89	90	-1	lose	24	54	30	0.444	8	26	18	0.308	17	18	1	0.944	2	10	8	0.2	26	66	40	0.394	8	36	0.706	0.205	15	6	18	2	27	21	5	10	6	13	1	7	5	9	1	4	1	5	3	6
2021-01-10	guangzhou	90	89	1	win	27	57	30	0.474	5	23	18	0.217	21	27	6	0.778	1	12	11	0.083	29	66	37	0.439	15	31	0.795	0.294	14	6	18	3	21	27	4	9	5	14	2	8	8	13	1	2	1	6	2	2
2021-01-10	beijing	92	95	-3	lose	23	39	16	0.59	8	31	23	0.258	22	26	4	0.846	4	7	3	0.571	25	61	36	0.41	10	28	0.737	0.278	16	6	20	3	22	24	5	6	6	19	2	5	10	14	3	4	0	2	3	7
2022-01-10	shanxi	120	109	11	win	33	59	26	0.559	12	33	21	0.364	18	24	6	0.75	6	15	9	0.4	35	73	38	0.479	18	32	0.711	0.429	27	10	18	7	19	27	10	19	6	18	7	11	3	10	0	4	2	2	2	3
2022-01-10	nanjing	87	101	-14	lose	20	53	33	0.377	10	27	17	0.37	17	22	5	0.773	3	6	3	0.5	26	73	47	0.356	12	27	0.794	0.261	16	10	21	3	31	24	4	9	5	13	4	9	4	9	1	3	3	6	0	1
2022-01-10	guangdong	101	87	14	win	28	55	27	0.509	4	11	7	0.364	33	42	9	0.786	0	1	1	0	32	65	33	0.492	7	34	0.739	0.206	22	6	18	4	24	31	7	13	1	3	2	5	6	12	4	6	2	5	1	2
2022-01-10	fujian	109	120	-11	lose	34	63	29	0.54	9	31	22	0.29	14	16	2	0.875	6	11	5	0.545	33	79	46	0.418	13	24	0.571	0.289	20	8	15	4	27	19	8	17	6	15	3	10	4	11	1	2	0	0	1	2
2021-01-11	xinjiang	126	92	34	win	34	58	24	0.586	12	33	21	0.364	22	26	4	0.846	12	30	18	0.4	32	59	27	0.542	21	36	0.766	0.553	37	12	21	3	29	20	12	19	8	20	2	5	6	10	2	6	8	12	0	0
2021-01-11	guangsha	114	122	-8	lose	19	49	30	0.388	10	23	13	0.435	46	53	7	0.868	10	19	9	0.526	15	49	34	0.306	5	29	0.784	0.152	19	8	16	4	31	36	8	14	7	16	1	4	5	17	0	2	1	6	1	3
2021-01-11	guangdong	122	114	8	win	30	55	25	0.545	11	25	14	0.44	29	33	4	0.879	7	18	11	0.389	32	60	28	0.533	8	28	0.848	0.216	21	8	13	10	36	31	11	16	5	14	3	8	7	16	4	6	0	0	1	4
2021-01-11	fujian	92	126	-34	lose	20	45	25	0.444	11	34	23	0.324	19	30	11	0.633	9	29	20	0.31	17	45	28	0.378	11	17	0.447	0.234	14	12	22	3	20	29	5	13	3	12	1	6	9	15	0	2	3	10	2	4
2022-01-11	zhejiang	96	84	12	win	19	41	22	0.463	11	33	22	0.333	25	29	4	0.862	1	3	2	0.333	28	70	42	0.4	7	31	0.689	0.194	22	5	15	9	29	28	4	13	4	16	3	4	3	5	4	6	0	1	0	0
2022-01-11	tianjin	94	125	-31	lose	26	53	27	0.491	10	30	20	0.333	12	15	3	0.8	8	19	11	0.421	27	63	36	0.429	10	16	0.516	0.25	23	5	11	3	22	19	5	9	4	10	4	7	13	19	2	6	0	1	2	5
2022-01-11	sichuan	105	78	27	win	27	59	32	0.458	11	21	10	0.524	18	26	8	0.692	1	3	2	0.333	33	73	40	0.452	15	32	0.727	0.385	23	6	10	6	23	22	3	4	9	13	1	5	2	6	1	3	8	22	0	1
2022-01-11	shenzhen	90	92	-2	lose	25	46	21	0.543	8	28	20	0.286	16	21	5	0.762	2	8	6	0.25	29	64	35	0.453	9	32	0.711	0.237	24	11	17	4	21	24	10	11	5	16	3	7	5	7	1	2	0	2	1	7
2022-01-11	shanghai	125	97	28	win	37	72	35	0.514	14	29	15	0.483	9	13	4	0.692	7	13	6	0.538	43	87	44	0.494	16	36	0.9	0.34	33	16	18	1	28	15	16	26	8	16	2	8	5	14	4	5	4	9	2	6
2022-01-11	shandong	97	125	-28	lose	22	41	19	0.537	13	34	21	0.382	14	22	8	0.636	9	15	6	0.6	24	58	34	0.414	4	31	0.66	0.1	19	9	28	6	15	28	9	16	5	17	2	4	4	11	2	5	2	6	3	6
2022-01-11	ningbo	78	105	-27	lose	19	46	27	0.413	10	34	24	0.294	10	14	4	0.714	2	6	4	0.333	25	72	47	0.347	12	24	0.615	0.273	16	3	13	5	22	23	1	6	9	23	1	3	2	5	1	2	6	14	1	3
2022-01-11	liaoning	92	90	2	win	32	61	29	0.525	6	23	17	0.261	10	22	12	0.455	3	4	1	0.75	32	77	45	0.416	13	29	0.763	0.289	17	10	14	3	24	21	7	9	4	11	4	7	7	19	0	4	0	0	3	9
2022-01-11	jiangsu	72	80	-8	lose	17	34	17	0.5	7	27	20	0.259	17	24	7	0.708	0	0	0	0	24	61	37	0.393	5	30	0.732	0.152	25	4	19	4	21	25	5	8	3	14	4	9	2	7	3	7	0	1	0	0
2022-01-11	guangzhou	80	72	8	win	22	41	19	0.537	8	31	23	0.258	12	20	8	0.6	2	5	3	0.4	24	63	39	0.381	11	28	0.848	0.268	26	8	13	5	25	21	4	14	4	18	4	10	1	1	4	6	0	1	1	2
2022-01-11	guangsha	125	94	31	win	30	49	19	0.612	15	36	21	0.417	20	23	3	0.87	8	16	8	0.5	35	67	32	0.522	15	30	0.75	0.484	39	3	10	5	19	22	2	5	13	31	5	8	5	10	1	3	4	7	0	2
2022-01-11	beikong	84	96	-12	lose	28	72	44	0.389	2	11	9	0.182	22	28	6	0.786	2	5	3	0.4	25	75	50	0.333	14	29	0.806	0.311	14	7	16	8	28	29	9	18	1	5	4	17	4	11	0	2	2	7	1	3
2021-01-12	zhejiang	109	95	14	win	29	54	25	0.537	10	32	22	0.313	21	27	6	0.778	3	7	4	0.429	35	78	43	0.449	13	31	0.646	0.283	17	8	8	5	21	22	11	16	7	16	2	7	12	15	0	2	0	2	1	2
2021-01-12	shenzhen	95	109	-14	lose	30	61	31	0.492	7	26	19	0.269	14	21	7	0.667	1	10	9	0.1	35	76	41	0.461	17	33	0.717	0.354	20	5	15	1	22	21	5	9	3	15	3	9	6	13	2	3	4	6	2	4
2021-01-12	shanxi	111	106	5	win	38	65	27	0.585	6	19	13	0.316	17	25	8	0.68	5	19	14	0.263	32	58	26	0.552	12	26	0.65	0.333	25	9	13	4	24	26	10	15	4	13	4	11	7	12	5	6	3	10	1	4
2021-01-12	shandong	105	117	-12	lose	28	48	20	0.583	11	28	17	0.393	16	20	4	0.8	5	11	6	0.455	32	63	31	0.508	8	19	0.528	0.216	23	13	20	2	26	23	8	15	6	9	3	7	8	14	0	3	1	3	6	8
2021-01-12	qingdao	94	114	-20	lose	28	45	17	0.622	7	28	21	0.25	17	25	8	0.68	9	26	17	0.346	22	43	21	0.512	7	17	0.63	0.175	19	9	13	2	28	24	6	8	6	17	3	6	7	13	1	3	6	6	2	6
2021-01-12	liaoning	117	105	12	win	32	58	26	0.552	8	21	13	0.381	29	37	8	0.784	9	16	7	0.563	27	59	32	0.458	17	29	0.784	0.472	21	8	20	3	23	26	10	13	4	10	5	8	6	12	1	2	1	2	2	4
2021-01-12	jilin	92	105	-13	lose	29	60	31	0.483	6	34	28	0.176	16	23	7	0.696	7	23	16	0.304	25	68	43	0.368	16	35	0.745	0.308	16	6	12	2	14	22	7	12	4	17	1	12	7	17	2	8	0	1	3	9
2021-01-12	jiangsu	106	111	-5	lose	34	59	25	0.576	7	23	16	0.304	17	21	4	0.81	5	17	12	0.294	34	63	29	0.54	14	24	0.667	0.35	18	6	18	4	26	24	10	12	5	13	1	7	10	18	1	2	2	3	6	8
2021-01-12	guangzhou	114	94	20	win	27	49	22	0.551	13	20	7	0.65	21	23	2	0.913	16	29	13	0.552	22	38	16	0.579	10	33	0.825	0.37	26	4	18	4	24	28	2	3	10	16	3	5	4	7	1	4	7	11	0	1
2021-01-12	beikong	105	92	13	win	23	48	25	0.479	17	41	24	0.415	8	14	6	0.571	11	25	14	0.44	25	60	35	0.417	12	36	0.692	0.255	23	8	14	8	22	14	7	14	6	23	3	7	5	9	0	3	2	6	3	3
2022-01-12	xinjiang	119	100	19	win	39	64	25	0.609	8	23	15	0.348	17	25	8	0.68	3	7	4	0.429	38	74	36	0.514	14	24	0.706	0.368	37	8	16	5	24	25	9	12	8	20	7	10	5	12	2	4	4	7	0	1
2022-01-12	qingdao	100	119	-19	lose	33	54	21	0.611	6	22	16	0.273	16	24	8	0.667	2	3	1	0.667	37	73	36	0.507	10	24	0.632	0.294	29	10	18	7	25	24	9	15	5	15	2	5	6	13	5	6	0	2	2	6
2022-01-12	jilin	75	106	-31	lose	15	39	24	0.385	8	28	20	0.286	21	27	6	0.778	3	11	8	0.273	17	53	36	0.321	8	21	0.583	0.211	20	9	13	4	16	27	4	9	6	17	0	5	5	13	0	4	1	4	2	6
2022-01-12	beijing	106	75	31	win	26	48	22	0.542	12	28	16	0.429	18	20	2	0.9	10	17	7	0.588	27	58	31	0.466	15	30	0.789	0.417	22	7	13	5	27	16	5	8	9	21	3	9	4	8	2	3	2	2	1	3
2021-01-13	xinjiang	97	110	-13	lose	25	51	26	0.49	8	26	18	0.308	23	35	12	0.657	8	25	17	0.32	22	49	27	0.449	10	33	0.825	0.27	23	8	22	5	30	31	4	9	6	15	1	6	4	11	4	8	7	15	0	0
2021-01-13	tianjin	106	94	12	win	20	41	21	0.488	16	31	15	0.516	18	24	6	0.75	16	33	17	0.485	18	37	19	0.486	11	19	0.514	0.324	24	15	19	5	20	21	5	8	11	20	3	11	4	12	1	2	0	4	0	0
2021-01-13	sichuan	88	114	-26	lose	23	52	29	0.442	11	34	23	0.324	9	17	8	0.529	3	10	7	0.3	28	73	45	0.384	11	30	0.638	0.234	25	8	21	4	31	17	7	20	9	29	5	10	4	10	1	3	2	3	0	3
2021-01-13	shanghai	110	97	13	win	30	58	28	0.517	9	26	17	0.346	23	29	6	0.793	9	24	15	0.375	26	56	30	0.464	7	27	0.73	0.175	18	12	12	3	31	30	8	16	0	3	1	1	6	15	3	6	3	3	1	5
2021-01-13	nanjing	94	106	-12	lose	34	55	21	0.618	4	23	19	0.174	14	19	5	0.737	4	17	13	0.235	31	58	27	0.534	18	23	0.676	0.486	24	10	24	1	21	20	10	15	3	12	3	9	6	11	2	4	4	5	1	1
2021-01-13	guangsha	139	101	38	win	43	61	18	0.705	10	21	11	0.476	23	28	5	0.821	14	22	8	0.636	32	53	21	0.604	11	36	0.818	0.407	33	5	16	5	31	25	10	10	12	21	6	9	8	10	1	2	5	8	3	4
2021-01-13	guangdong	114	88	26	win	36	64	28	0.563	6	25	19	0.24	24	36	12	0.667	1	8	7	0.125	36	76	40	0.474	17	36	0.766	0.362	14	10	15	3	17	31	16	26	3	14	3	6	11	22	2	3	0	1	0	3
2021-01-13	fujian	101	139	-38	lose	22	50	28	0.44	9	24	15	0.375	30	37	7	0.811	4	10	6	0.4	25	62	37	0.403	8	16	0.593	0.182	18	7	12	4	25	31	3	6	5	10	1	9	7	17	2	5	6	8	4	6
2022-01-13	sichuan	71	92	-21	lose	21	48	27	0.438	5	25	20	0.2	14	19	5	0.737	2	4	2	0.5	23	68	45	0.338	10	30	0.732	0.222	9	6	16	3	24	24	2	5	4	16	7	8	6	8	0	6	5	15	0	1
2022-01-13	shanghai	118	104	14	win	20	45	25	0.444	17	34	17	0.5	27	34	7	0.794	1	2	1	0.5	35	76	41	0.461	18	29	0.659	0.4	19	9	17	4	32	30	5	11	10	21	2	14	7	14	2	2	4	5	0	6
2022-01-13	ningbo	66	89	-23	lose	25	48	23	0.521	4	27	23	0.148	4	5	1	0.8	1	8	7	0.125	27	66	39	0.409	11	25	0.694	0.262	14	9	22	5	17	16	5	9	4	19	2	6	5	8	0	3	4	8	1	2
2022-01-13	liaoning	102	90	12	win	27	57	30	0.474	8	28	20	0.286	24	33	9	0.727	2	3	1	0.667	31	80	49	0.388	14	32	0.78	0.292	28	12	10	4	23	28	5	10	7	15	2	4	2	7	0	5	4	4	0	6
2022-01-13	jiangsu	89	66	23	win	31	51	20	0.608	5	24	19	0.208	12	14	2	0.857	1	9	8	0.111	33	64	31	0.516	11	31	0.738	0.306	23	13	17	5	16	17	4	5	2	9	3	5	14	21	3	6	2	6	2	3
2022-01-13	guangzhou	92	71	21	win	15	43	28	0.349	14	32	18	0.438	20	22	2	0.909	3	6	3	0.5	26	69	43	0.377	11	35	0.778	0.268	15	8	14	1	24	24	2	5	7	19	0	7	0	1	1	2	1	4	0	1
2022-01-13	guangsha	125	111	14	win	27	46	19	0.587	15	31	16	0.484	26	32	6	0.813	6	10	4	0.6	32	63	31	0.508	11	23	0.719	0.314	29	9	7	4	18	29	6	10	12	19	2	7	6	9	1	2	4	8	1	3
2022-01-13	guangdong	90	102	-12	lose	20	45	25	0.444	10	27	17	0.37	20	24	4	0.833	4	11	7	0.364	22	57	35	0.386	9	34	0.708	0.22	26	6	19	7	29	22	7	13	9	20	2	6	2	6	3	8	0	2	0	1
2022-01-13	fujian	111	125	-14	lose	28	48	20	0.583	13	28	15	0.464	16	17	1	0.941	4	6	2	0.667	36	69	33	0.522	9	24	0.686	0.281	25	3	15	2	29	18	8	9	6	15	1	4	7	12	4	4	0	0	8	13
2022-01-13	beikong	104	118	-14	lose	31	64	33	0.484	6	19	13	0.316	24	34	10	0.706	3	9	6	0.333	32	72	40	0.444	15	27	0.6	0.341	18	11	11	6	30	32	5	8	3	11	3	8	7	19	4	11	5	7	6	8
2020-01-14	zhejiang	112	113	-1	lose	26	50	24	0.52	11	33	22	0.333	27	35	8	0.771	4	6	2	0.667	29	73	44	0.397	11	25	0.758	0.239	19	10	10	7	24	30	8	13	9	22	2	3	4	8	0	3	0	0	2	6
2020-01-14	xinjiang	132	118	14	win	39	53	14	0.736	12	29	17	0.414	18	24	6	0.75	3	5	2	0.6	47	76	29	0.618	8	35	0.875	0.276	27	7	14	2	30	24	7	8	13	27	3	5	6	8	2	2	6	11	1	1
2020-01-14	tianjin	122	102	20	win	28	44	16	0.636	13	28	15	0.464	27	32	5	0.844	7	13	6	0.538	33	58	25	0.569	9	32	0.865	0.346	23	6	14	1	26	26	4	6	11	21	3	4	4	9	3	4	2	4	0	6
2020-01-14	sichuan	105	100	5	win	20	44	24	0.455	12	37	25	0.324	29	36	7	0.806	3	8	5	0.375	27	71	44	0.38	15	22	0.786	0.357	19	13	15	1	26	31	8	10	9	28	1	2	4	7	0	4	3	13	1	2
2020-01-14	shanxi	119	109	10	win	27	49	22	0.551	19	43	24	0.442	8	13	5	0.615	13	27	14	0.481	30	62	32	0.484	21	37	0.725	0.447	27	3	23	6	15	17	6	9	11	24	4	8	10	19	5	11	3	5	2	9
2020-01-14	shanghai	102	122	-20	lose	23	52	29	0.442	13	24	11	0.542	17	20	3	0.85	9	21	12	0.429	25	53	28	0.472	5	17	0.654	0.135	16	7	11	1	26	26	5	7	10	22	3	6	8	18	3	5	2	3	2	2
2020-01-14	shandong	98	95	3	win	25	38	13	0.658	10	29	19	0.345	18	27	9	0.667	8	9	1	0.889	24	55	31	0.436	5	32	0.821	0.147	22	6	12	2	27	26	8	10	7	17	1	4	4	5	0	6	1	3	2	4
2020-01-14	ningbo	102	110	-8	lose	27	61	34	0.443	10	24	14	0.417	18	22	4	0.818	9	25	16	0.36	20	52	32	0.385	7	24	0.706	0.159	24	13	15	3	24	26	7	12	13	33	7	11	7	14	1	5	2	6	0	0
2020-01-14	nanjing	113	112	1	win	34	56	22	0.607	5	20	15	0.25	30	33	3	0.909	2	3	1	0.667	31	67	36	0.463	8	35	0.761	0.242	19	5	18	3	30	24	8	12	4	13	2	3	7	10	0	1	4	10	1	4
2020-01-14	liaoning	110	102	8	win	35	61	26	0.574	9	22	13	0.409	13	18	5	0.722	9	17	8	0.529	29	60	31	0.483	10	37	0.841	0.294	27	12	19	1	26	24	11	14	5	13	3	5	10	19	4	7	3	8	4	9
2020-01-14	jilin	100	123	-23	lose	31	48	17	0.646	5	27	22	0.185	23	33	10	0.697	1	3	2	0.333	34	71	37	0.479	8	26	0.619	0.222	19	9	15	5	22	23	5	9	7	16	5	9	7	15	0	1	4	5	3	18
2020-01-14	jiangsu	100	105	-5	lose	23	38	15	0.605	11	29	18	0.379	21	26	5	0.808	4	6	2	0.667	28	59	31	0.475	6	27	0.643	0.214	26	7	20	4	31	26	5	8	10	23	2	2	4	8	1	2	2	5	1	4
2020-01-14	guangzhou	95	98	-3	lose	23	45	22	0.511	8	30	22	0.267	25	29	4	0.862	5	7	2	0.714	25	67	42	0.373	7	29	0.853	0.179	17	6	7	1	26	27	3	5	9	29	1	6	2	6	1	1	3	5	1	3
2020-01-14	guangsha	109	119	-10	lose	39	74	35	0.527	6	27	21	0.222	13	14	1	0.929	6	19	13	0.316	37	80	43	0.463	14	26	0.553	0.275	16	12	10	3	17	15	9	21	5	17	5	9	17	28	2	4	2	5	2	4
2020-01-14	guangdong	123	100	23	win	35	58	23	0.603	13	33	20	0.394	14	17	3	0.824	3	5	2	0.6	42	83	41	0.506	16	28	0.778	0.381	28	8	13	2	23	22	14	16	9	19	2	5	3	12	2	6	0	2	2	8
2020-01-14	fujian	118	132	-14	lose	28	50	22	0.56	12	25	13	0.48	26	36	10	0.722	2	2	0	1	36	71	35	0.507	5	21	0.724	0.125	17	8	9	1	24	30	6	7	5	9	4	5	9	13	3	9	5	7	7	12
2021-01-14	zhejiang	106	104	2	win	18	38	20	0.474	12	36	24	0.333	34	39	5	0.872	7	17	10	0.412	21	55	34	0.382	12	28	0.667	0.308	17	7	14	2	26	31	6	10	7	14	1	4	7	18	1	6	0	0	2	8
2021-01-14	shenzhen	104	117	-13	lose	28	49	21	0.571	12	33	21	0.364	12	14	2	0.857	12	33	21	0.364	26	47	21	0.553	7	24	0.686	0.194	22	7	17	4	23	23	7	10	6	14	3	9	9	14	4	8	1	3	2	6
2021-01-14	shanxi	94	105	-11	lose	29	54	25	0.537	7	23	16	0.304	15	20	5	0.75	8	24	16	0.333	25	50	25	0.5	14	32	0.821	0.333	20	9	20	3	19	24	11	18	2	9	2	6	6	13	0	3	2	6	1	4
2021-01-14	liaoning	117	104	13	win	37	57	20	0.649	7	23	16	0.304	22	27	5	0.815	5	21	16	0.238	35	55	20	0.636	11	29	0.806	0.314	23	13	16	0	23	23	8	15	5	13	3	6	10	16	2	6	1	2	1	3
2021-01-14	guangzhou	105	94	11	win	25	44	19	0.568	15	36	21	0.417	10	12	2	0.833	14	32	18	0.438	22	44	22	0.5	7	28	0.667	0.179	28	8	14	3	24	19	7	10	8	18	1	5	5	9	1	4	2	3	1	3
2021-01-14	beijing	104	106	-2	lose	26	56	30	0.464	12	29	17	0.414	16	22	6	0.727	12	18	6	0.667	25	66	41	0.379	14	27	0.692	0.333	21	6	11	7	31	26	7	10	7	17	3	8	4	12	1	3	3	8	2	5
2022-01-14	zhejiang	98	91	7	win	30	53	23	0.566	7	22	15	0.318	17	20	3	0.85	0	2	2	0	34	70	36	0.486	10	29	0.806	0.303	26	12	20	2	18	22	8	15	3	10	5	6	7	11	1	4	1	3	1	1
2022-01-14	xinjiang	91	98	-7	lose	25	49	24	0.51	8	21	13	0.381	17	20	3	0.85	1	4	3	0.25	31	65	34	0.477	7	23	0.697	0.194	32	13	22	5	22	18	0	6	7	17	4	7	3	11	2	6	4	7	1	1
2022-01-14	tianjin	113	109	4	win	23	41	18	0.561	15	44	29	0.341	22	26	4	0.846	6	16	10	0.375	29	66	37	0.439	12	33	0.805	0.3	19	6	18	2	27	24	4	8	3	13	4	9	11	17	2	4	1	2	7	15
2022-01-14	shenzhen	102	103	-1	lose	30	50	20	0.6	8	25	17	0.32	18	24	6	0.75	1	6	5	0.167	33	65	32	0.508	15	26	0.667	0.429	25	9	20	1	19	20	9	13	5	16	5	12	7	15	0	1	1	2	3	4
2022-01-14	shanxi	109	113	-4	lose	33	59	26	0.559	7	29	22	0.241	22	27	5	0.815	2	13	11	0.154	35	72	37	0.486	8	28	0.7	0.195	22	10	9	0	24	27	3	10	6	13	5	11	9	17	0	1	0	2	6	9
2022-01-14	shandong	104	98	6	win	26	49	23	0.531	9	26	17	0.346	25	28	3	0.893	7	16	9	0.438	25	56	31	0.446	12	28	0.778	0.353	29	9	20	3	24	26	7	11	7	18	4	7	6	9	3	5	2	4	3	5
2022-01-14	qingdao	98	104	-6	lose	23	47	24	0.489	12	25	13	0.48	16	21	5	0.762	8	14	6	0.571	26	57	31	0.456	8	22	0.647	0.222	21	16	18	3	26	24	10	15	6	15	3	6	4	9	3	4	2	6	0	2
2022-01-14	nanjing	77	114	-37	lose	20	38	18	0.526	10	34	24	0.294	7	10	3	0.7	2	8	6	0.25	28	64	36	0.438	7	21	0.7	0.175	20	8	18	1	26	11	5	9	5	20	4	7	4	6	2	3	1	1	2	4
2022-01-14	jilin	103	102	1	win	32	56	24	0.571	8	26	18	0.308	15	18	3	0.833	0	6	6	0	38	74	36	0.514	13	20	0.571	0.333	23	11	16	0	20	19	6	11	3	13	5	9	10	17	4	4	1	2	5	11
2022-01-14	beijing	114	77	37	win	32	55	23	0.582	7	17	10	0.412	29	31	2	0.935	3	4	1	0.75	31	63	32	0.492	9	33	0.825	0.3	28	10	13	3	11	26	8	9	8	17	3	9	5	11	0	2	2	3	0	2
2019-01-15	zhejiang	113	91	22	win	27	57	30	0.474	12	36	24	0.333	23	30	7	0.767	4	7	3	0.571	33	84	51	0.393	13	32	0.727	0.25	20	7	9	3	24	20	4	9	10	17	1	7	11	23	1	4	1	3	1	3
2019-01-15	xinjiang	109	126	-17	lose	31	52	21	0.596	9	32	23	0.281	20	25	5	0.8	4	16	12	0.25	31	63	32	0.492	9	28	0.737	0.22	21	9	17	1	24	24	11	19	3	16	2	5	8	16	1	1	4	8	1	5
2019-01-15	tianjin	106	128	-22	lose	17	43	26	0.395	15	29	14	0.517	27	38	11	0.711	2	4	2	0.5	29	67	38	0.433	8	26	0.788	0.2	21	6	15	3	24	30	4	10	10	19	3	7	6	15	0	0	2	4	1	4
2019-01-15	sichuan	94	105	-11	lose	26	50	24	0.52	6	29	23	0.207	24	33	9	0.727	6	23	17	0.261	22	52	30	0.423	13	31	0.816	0.271	21	2	13	2	24	26	10	13	3	20	1	7	6	17	2	3	2	4	2	5
2019-01-15	shenzhen	110	91	19	win	32	61	29	0.525	12	35	23	0.343	10	13	3	0.769	6	18	12	0.333	37	77	40	0.481	15	34	0.68	0.313	25	10	7	6	19	25	14	26	7	17	3	5	8	16	2	3	1	3	0	5
2019-01-15	shanxi	91	113	-22	lose	31	61	30	0.508	2	17	15	0.118	23	32	9	0.719	2	9	7	0.222	29	67	38	0.433	12	39	0.75	0.273	15	5	18	7	20	24	6	14	3	13	5	10	8	17	4	7	1	4	0	2
2019-01-15	shandong	126	109	17	win	40	59	19	0.678	9	27	18	0.333	19	26	7	0.731	8	21	13	0.381	36	60	24	0.6	10	32	0.78	0.263	33	14	15	3	25	24	14	19	10	24	4	7	6	10	4	5	3	9	1	1
2019-01-15	qingdao	113	140	-27	lose	29	53	24	0.547	9	24	15	0.375	28	39	11	0.718	6	17	11	0.353	30	58	28	0.517	8	23	0.767	0.182	14	7	12	1	14	25	11	15	2	10	4	11	14	23	1	2	1	3	9	13
2019-01-15	nanjing	91	110	-19	lose	23	47	24	0.489	12	39	27	0.308	9	11	2	0.818	6	12	6	0.5	26	71	45	0.366	16	33	0.688	0.32	12	6	19	1	25	19	6	13	4	16	5	11	9	21	0	1	1	2	4	13
2019-01-15	liaoning	140	113	27	win	43	67	24	0.642	13	23	10	0.565	15	16	1	0.938	13	24	11	0.542	42	65	23	0.646	7	36	0.818	0.233	29	10	8	2	25	14	10	17	10	14	3	6	12	22	0	2	2	5	6	9
2019-01-15	jilin	105	94	11	win	30	58	28	0.517	8	27	19	0.296	21	25	4	0.84	10	25	15	0.4	27	59	32	0.458	7	35	0.729	0.184	20	7	7	1	26	24	8	19	5	14	2	4	8	13	3	7	5	10	5	9
2019-01-15	jiangsu	128	106	22	win	39	56	17	0.696	11	27	16	0.407	17	25	8	0.68	4	8	4	0.5	43	72	29	0.597	7	32	0.8	0.212	28	10	10	4	30	24	14	22	8	20	3	6	8	14	3	3	1	1	0	0
2019-01-15	guangdong	139	100	39	win	41	68	27	0.603	14	28	14	0.5	15	21	6	0.714	18	33	15	0.545	34	60	26	0.567	12	35	0.636	0.3	37	13	8	3	27	21	22	29	10	20	4	9	13	29	0	0	0	0	0	2
2019-01-15	fujian	100	139	-39	lose	26	55	29	0.473	8	32	24	0.25	24	31	7	0.774	7	26	19	0.269	22	56	34	0.393	20	28	0.7	0.364	25	4	19	4	21	27	7	12	6	19	6	11	13	31	0	0	0	5	2	9
2020-01-15	shenzhen	100	102	-2	lose	17	45	28	0.378	18	35	17	0.514	12	18	6	0.667	18	35	17	0.514	12	40	28	0.3	11	25	0.532	0.25	25	14	19	5	26	25	7	10	12	23	4	12	2	13	1	1	3	5	0	4
2020-01-15	qingdao	115	92	23	win	30	51	21	0.588	12	30	18	0.4	19	27	8	0.704	7	22	15	0.318	32	56	24	0.571	9	34	0.81	0.237	25	9	11	3	20	29	12	15	5	16	6	12	12	26	2	3	2	3	3	8
2020-01-15	beikong	102	100	2	win	25	50	25	0.5	10	27	17	0.37	22	33	11	0.667	10	22	12	0.455	23	53	30	0.434	22	33	0.75	0.468	19	9	21	3	25	26	3	6	4	12	1	3	7	14	4	6	1	6	5	10
2020-01-15	beijing	92	115	-23	lose	20	49	29	0.408	13	29	16	0.448	13	17	4	0.765	15	33	18	0.455	17	44	27	0.386	8	29	0.763	0.19	25	7	19	6	29	20	7	9	11	20	1	5	5	19	4	9	2	3	1	3
2021-01-15	xinjiang	109	99	10	win	24	43	19	0.558	15	30	15	0.5	16	23	7	0.696	11	19	8	0.579	26	52	26	0.5	11	31	0.738	0.333	25	7	19	5	23	22	10	12	8	19	2	2	4	5	1	3	6	15	1	4
2021-01-15	tianjin	96	121	-25	lose	16	37	21	0.432	14	41	27	0.341	22	28	6	0.786	11	32	21	0.344	19	46	27	0.413	12	17	0.5	0.279	21	6	13	2	29	23	8	10	8	22	1	3	1	7	2	6	1	5	1	4
2021-01-15	sichuan	113	104	9	win	33	55	22	0.6	9	25	16	0.36	20	26	6	0.769	1	8	7	0.125	38	69	31	0.551	14	28	0.737	0.4	24	8	11	4	23	20	4	4	4	14	5	8	8	13	3	8	3	8	2	5
2021-01-15	shanghai	121	96	25	win	28	48	20	0.583	13	31	18	0.419	26	35	9	0.743	9	21	12	0.429	31	57	26	0.544	17	31	0.721	0.5	18	7	14	2	23	29	6	8	5	14	2	5	4	13	3	8	4	5	6	10
2021-01-15	shandong	110	106	4	win	27	49	22	0.551	16	34	18	0.471	8	10	2	0.8	16	31	15	0.516	25	50	25	0.5	8	30	0.732	0.216	29	8	14	4	19	23	8	12	6	12	5	5	5	16	3	8	0	1	0	2
2021-01-15	qingdao	106	110	-4	lose	36	66	30	0.545	8	21	13	0.381	10	14	4	0.714	9	25	16	0.36	31	58	27	0.534	11	29	0.784	0.268	24	8	13	2	23	19	9	16	6	15	4	7	8	17	4	7	2	6	1	3
2021-01-15	nanjing	92	99	-7	lose	29	56	27	0.518	9	31	22	0.29	7	11	4	0.636	2	4	2	0.5	33	80	47	0.413	16	21	0.677	0.372	25	7	15	4	33	20	5	8	8	19	0	1	3	6	0	6	6	10	2	5
2021-01-15	jilin	99	109	-10	lose	29	54	25	0.537	7	26	19	0.269	20	27	7	0.741	5	10	5	0.5	26	65	39	0.4	11	22	0.667	0.262	18	10	11	2	22	23	7	11	3	12	4	6	11	17	1	4	3	7	3	14
2021-01-15	guangsha	99	92	7	win	24	49	25	0.49	5	14	9	0.357	36	43	7	0.837	1	5	4	0.2	25	55	30	0.455	10	27	0.628	0.323	21	9	17	3	20	33	5	10	4	7	1	3	4	9	0	1	5	9	2	2
2021-01-15	guangdong	127	109	18	win	34	52	18	0.654	12	28	16	0.429	23	30	7	0.767	8	17	9	0.471	34	59	25	0.576	8	33	0.767	0.222	15	12	17	3	28	24	10	18	3	6	2	5	10	16	4	4	1	2	4	7
2021-01-15	fujian	104	113	-9	lose	17	38	21	0.447	18	39	21	0.462	16	18	2	0.889	5	7	2	0.714	28	68	40	0.412	10	21	0.6	0.263	20	6	13	2	20	23	5	7	10	23	3	12	6	12	1	2	3	4	4	7
2021-01-15	beikong	109	127	-18	lose	22	46	24	0.478	15	37	22	0.405	20	25	5	0.8	13	29	16	0.448	24	54	30	0.444	10	28	0.778	0.233	19	10	18	5	24	28	6	12	10	23	2	7	6	15	0	3	1	5	3	11
2022-01-15	shanghai	103	84	19	win	26	55	29	0.473	12	30	18	0.4	15	20	5	0.75	3	4	1	0.75	35	81	46	0.432	8	38	0.864	0.182	31	8	4	6	25	20	7	14	10	18	2	5	2	4	2	3	3	14	1	6
2022-01-15	liaoning	109	83	26	win	33	64	31	0.516	8	29	21	0.276	19	23	4	0.826	5	11	6	0.455	29	75	46	0.387	12	36	0.8	0.24	20	16	10	3	10	24	8	18	7	17	1	4	2	6	0	3	1	5	3	8
2022-01-15	jiangsu	82	114	-32	lose	17	35	18	0.486	11	31	20	0.355	15	22	7	0.682	4	8	4	0.5	23	57	34	0.404	10	10	0.435	0.303	20	7	24	2	32	22	2	2	5	13	1	4	3	11	4	9	2	3	1	4
2022-01-15	guangzhou	84	103	-19	lose	23	55	32	0.418	7	24	17	0.292	17	26	9	0.654	1	6	5	0.167	25	69	44	0.362	6	36	0.818	0.136	21	1	13	7	20	25	4	11	7	20	5	10	8	13	0	3	1	4	1	3
2022-01-15	guangsha	114	94	20	win	33	54	21	0.611	12	29	17	0.414	12	16	4	0.75	2	7	5	0.286	41	74	33	0.554	14	29	0.829	0.389	20	9	10	2	21	12	5	14	8	15	1	3	6	10	1	3	8	12	1	3
2022-01-15	guangdong	94	114	-20	lose	18	38	20	0.474	15	30	15	0.5	13	20	7	0.65	3	7	4	0.429	29	60	31	0.483	6	22	0.611	0.171	17	4	15	4	12	21	4	7	3	7	1	5	8	19	1	2	2	2	2	7
2022-01-15	fujian	83	109	-26	lose	24	47	23	0.511	8	32	24	0.25	11	14	3	0.786	4	9	5	0.444	27	69	42	0.391	9	38	0.76	0.2	22	6	21	5	24	10	8	16	3	16	4	8	5	8	0	2	2	4	2	7
2022-01-15	beikong	114	82	32	win	34	50	16	0.68	6	13	7	0.462	28	37	9	0.757	3	5	2	0.6	36	57	21	0.632	13	23	0.697	0.565	28	12	13	7	22	32	6	7	5	13	5	11	8	8	5	5	4	11	2	2
2019-01-16	ningbo	87	119	-32	lose	24	47	23	0.511	8	24	16	0.333	15	24	9	0.625	6	18	12	0.333	24	51	27	0.471	9	30	0.75	0.22	17	6	21	2	25	25	6	10	6	15	2	5	4	15	2	6	4	5	0	1
2019-01-16	guangzhou	133	92	41	win	30	44	14	0.682	18	41	23	0.439	19	20	1	0.95	14	30	16	0.467	30	51	21	0.588	12	36	0.837	0.353	28	11	13	0	19	21	14	18	14	29	3	5	5	10	0	3	0	1	6	11
2019-01-16	guangsha	119	87	32	win	37	61	24	0.607	8	23	15	0.348	21	26	5	0.808	7	20	13	0.35	34	60	26	0.567	10	32	0.78	0.25	31	14	9	4	25	25	11	17	7	17	4	8	10	20	2	2	5	7	0	1
2019-01-16	beikong	92	133	-41	lose	23	43	20	0.535	10	31	21	0.323	16	24	8	0.667	7	24	17	0.292	24	48	24	0.5	7	22	0.647	0.163	17	9	16	1	21	19	5	8	10	22	3	7	12	22	1	3	0	3	3	8
2020-01-16	tianjin	94	106	-12	lose	19	49	30	0.388	10	38	28	0.263	26	34	8	0.765	4	18	14	0.222	20	64	44	0.313	21	20	0.645	0.382	16	10	12	0	24	31	1	4	5	24	2	12	8	22	2	4	0	4	4	5
2020-01-16	sichuan	100	122	-22	lose	27	59	32	0.458	7	28	21	0.25	25	32	7	0.781	6	30	24	0.2	22	51	29	0.431	12	35	0.7	0.245	22	4	14	2	25	29	3	6	6	20	4	8	7	16	0	1	4	8	0	2
2020-01-16	shanxi	116	107	9	win	26	44	18	0.591	15	33	18	0.455	19	30	11	0.633	4	8	4	0.5	32	64	32	0.5	11	31	0.646	0.306	22	7	16	6	19	31	11	11	6	10	1	6	6	15	2	3	2	5	8	20
2020-01-16	shanghai	107	116	-9	lose	30	63	33	0.476	9	29	20	0.31	20	22	2	0.909	9	21	12	0.429	28	69	41	0.406	17	25	0.694	0.354	25	6	13	2	31	19	8	12	7	22	0	5	3	13	1	3	1	1	1	6
2020-01-16	shandong	106	94	12	win	26	44	18	0.591	12	29	17	0.414	18	23	5	0.783	6	15	9	0.4	31	57	26	0.544	11	34	0.618	0.355	20	5	22	7	31	24	7	11	5	14	4	8	9	19	1	8	3	7	1	1
2020-01-16	nanjing	101	110	-9	lose	28	55	27	0.509	12	32	20	0.375	9	13	4	0.692	6	11	5	0.545	34	76	42	0.447	8	29	0.617	0.186	21	5	10	3	27	21	8	10	8	20	0	5	12	28	3	4	0	1	3	4
2020-01-16	liaoning	110	101	9	win	35	67	32	0.522	4	18	14	0.222	28	37	9	0.757	5	16	11	0.313	31	66	35	0.47	18	35	0.814	0.383	16	5	9	2	21	27	5	7	7	28	6	8	13	22	2	3	1	2	3	8
2020-01-16	jiangsu	103	138	-35	lose	22	42	20	0.524	10	29	19	0.345	29	35	6	0.829	10	26	16	0.385	19	42	23	0.452	7	25	0.625	0.184	23	8	25	2	25	29	9	12	6	14	4	6	6	11	0	2	0	6	2	4
2020-01-16	guangsha	138	103	35	win	36	63	27	0.571	13	28	15	0.464	27	33	6	0.818	6	25	19	0.24	42	65	23	0.646	15	31	0.816	0.375	20	15	16	3	29	25	13	16	5	15	3	10	10	17	0	4	3	5	9	11
2020-01-16	guangdong	122	100	22	win	29	56	27	0.518	17	40	23	0.425	13	20	7	0.65	17	38	21	0.447	25	54	29	0.463	15	37	0.755	0.3	30	9	11	4	29	25	15	24	9	23	1	7	3	14	2	7	0	1	4	6
2021-01-16	zhejiang	97	81	16	win	24	58	34	0.414	12	34	22	0.353	13	15	2	0.867	12	31	19	0.387	21	58	37	0.362	16	29	0.935	0.314	23	10	10	1	22	18	11	17	9	20	0	5	5	16	2	8	0	1	0	0
2021-01-16	shanxi	81	97	-16	lose	28	56	28	0.5	4	11	7	0.364	13	18	5	0.722	7	16	9	0.438	23	49	26	0.469	2	35	0.686	0.065	18	5	20	6	18	22	5	10	2	4	0	0	5	8	1	2	4	13	0	0
2021-01-16	liaoning	99	91	8	win	23	47	24	0.489	10	30	20	0.333	23	33	10	0.697	11	21	10	0.524	20	54	34	0.37	8	27	0.643	0.182	22	9	9	2	23	25	8	11	6	18	1	4	3	5	2	5	0	3	4	6
2021-01-16	jiangsu	91	120	-29	lose	22	48	26	0.458	9	28	19	0.321	20	27	7	0.741	3	13	10	0.231	26	61	35	0.426	8	23	0.676	0.186	9	6	12	2	21	25	7	11	4	16	2	4	4	10	0	4	1	3	3	7
2021-01-16	guangzhou	91	99	-8	lose	23	51	28	0.451	10	32	22	0.313	15	23	8	0.652	6	18	12	0.333	24	62	38	0.387	15	36	0.818	0.357	16	7	17	6	25	23	2	8	8	21	4	10	6	13	0	3	4	8	1	3
2021-01-16	beijing	120	91	29	win	30	44	14	0.682	15	39	24	0.385	15	17	2	0.882	6	15	9	0.4	35	64	29	0.547	11	35	0.814	0.324	32	8	11	4	25	21	7	9	14	35	1	5	6	11	2	2	3	5	2	5
2022-01-16	zhejiang	100	94	6	win	22	44	22	0.5	8	32	24	0.25	32	40	8	0.8	3	7	4	0.429	22	64	42	0.344	13	22	0.611	0.283	23	11	9	5	29	35	4	7	3	15	1	4	4	7	4	8	2	5	3	4
2022-01-16	xinjiang	97	102	-5	lose	30	62	32	0.484	9	25	16	0.36	10	12	2	0.833	9	20	11	0.45	26	63	37	0.413	11	28	0.737	0.256	30	9	17	3	30	18	4	13	9	15	4	9	4	13	2	6	5	8	1	5
2022-01-16	tianjin	101	99	2	win	20	42	22	0.476	16	38	22	0.421	13	18	5	0.722	10	27	17	0.37	24	51	27	0.471	13	30	0.682	0.302	16	6	15	5	19	22	3	7	6	18	1	4	7	11	3	7	0	2	6	10
2022-01-16	sichuan	102	97	5	win	25	53	28	0.472	9	21	12	0.429	25	30	5	0.833	4	7	3	0.571	28	65	37	0.431	10	32	0.744	0.263	22	9	19	4	18	30	10	19	6	9	1	4	0	9	1	4	5	11	2	4
2022-01-16	shenzhen	122	102	20	win	35	55	20	0.636	13	32	19	0.406	13	20	7	0.65	5	11	6	0.455	40	73	33	0.548	17	25	0.714	0.405	32	10	11	5	17	21	8	15	11	20	2	10	1	6	1	4	6	8	0	3
2022-01-16	shanxi	90	115	-25	lose	18	41	23	0.439	10	35	25	0.286	24	32	8	0.75	1	1	0	1	24	72	48	0.333	14	25	0.625	0.286	15	4	12	1	16	23	3	8	6	17	3	7	4	10	1	4	0	3	0	4
2022-01-16	shandong	94	100	-6	lose	20	41	21	0.488	11	28	17	0.393	21	30	9	0.7	1	2	1	0.5	29	66	37	0.439	14	33	0.717	0.389	23	5	17	1	35	29	3	6	4	7	4	12	6	11	2	6	5	9	3	7
2022-01-16	qingdao	119	78	41	win	37	62	25	0.597	9	24	15	0.375	18	28	10	0.643	8	17	9	0.471	33	64	31	0.516	10	34	0.739	0.256	27	10	9	3	18	25	8	14	9	18	1	4	5	10	0	1	7	10	3	4
2022-01-16	ningbo	78	119	-41	lose	23	58	35	0.397	6	22	16	0.273	14	15	1	0.933	3	13	10	0.231	23	64	41	0.359	12	29	0.744	0.261	19	8	21	1	25	18	2	3	7	28	3	12	3	9	1	2	0	3	0	1
2022-01-16	nanjing	102	122	-20	lose	28	47	19	0.596	13	35	22	0.371	7	11	4	0.636	5	11	6	0.455	35	70	35	0.5	10	25	0.595	0.286	28	8	15	1	21	17	8	15	8	14	1	3	2	2	0	3	2	5	1	6
2022-01-16	jilin	99	101	-2	lose	24	48	24	0.5	13	40	27	0.325	12	14	2	0.857	8	23	15	0.348	27	63	36	0.429	14	30	0.698	0.318	19	6	12	3	22	19	12	17	7	17	1	6	4	6	0	3	2	2	4	13
2022-01-16	beijing	115	90	25	win	33	58	25	0.569	12	29	17	0.414	13	17	4	0.765	2	2	0	1	38	80	42	0.475	15	35	0.714	0.375	22	5	11	3	23	16	5	7	6	13	2	7	4	8	3	8	1	5	1	3
2019-01-17	xinjiang	111	91	20	win	26	51	25	0.51	18	42	24	0.429	5	8	3	0.625	6	10	4	0.6	38	83	45	0.458	14	31	0.689	0.311	21	8	13	4	17	15	12	22	8	27	1	2	8	16	0	1	2	6	4	5
2019-01-17	sichuan	91	111	-20	lose	28	59	31	0.475	11	32	21	0.344	2	6	4	0.333	3	8	5	0.375	34	81	47	0.42	14	31	0.689	0.311	23	5	17	4	15	17	10	13	9	27	3	13	9	25	0	1	1	2	0	2
2019-01-17	shanxi	92	86	6	win	21	50	29	0.42	8	23	15	0.348	26	32	6	0.813	4	9	5	0.444	23	62	39	0.371	11	29	0.674	0.268	21	8	19	0	18	28	8	10	7	20	2	7	4	14	1	4	0	3	3	9
2019-01-17	shandong	90	110	-20	lose	22	42	20	0.524	7	27	20	0.259	25	36	11	0.694	3	13	10	0.231	24	54	30	0.444	8	27	0.794	0.195	13	8	18	1	21	32	7	9	3	17	2	7	2	7	0	1	5	8	1	5
2019-01-17	nanjing	86	92	-6	lose	22	46	24	0.478	11	32	21	0.344	9	11	2	0.818	4	9	5	0.444	28	68	40	0.412	14	30	0.732	0.326	21	11	18	4	28	18	3	8	8	15	5	10	12	21	0	0	0	1	7	19
2019-01-17	jiangsu	110	90	20	win	32	52	20	0.615	11	29	18	0.379	13	17	4	0.765	5	13	8	0.385	35	65	30	0.538	7	33	0.805	0.206	26	10	15	3	32	21	7	12	6	13	0	2	2	8	1	3	5	7	2	5
2020-01-17	zhejiang	126	97	29	win	30	47	17	0.638	13	31	18	0.419	27	32	5	0.844	3	7	4	0.429	38	69	31	0.551	11	29	0.58	0.344	23	8	13	12	28	27	8	10	10	22	3	4	13	16	2	4	0	2	8	12
2020-01-17	xinjiang	94	102	-8	lose	25	44	19	0.568	7	33	26	0.212	23	30	7	0.767	4	12	8	0.333	26	63	37	0.413	11	26	0.591	0.25	20	10	14	7	23	24	12	17	5	20	2	5	5	10	0	3	1	3	0	0
2020-01-17	shenzhen	87	91	-4	lose	25	51	26	0.49	8	21	13	0.381	13	18	5	0.722	5	8	3	0.625	27	63	36	0.429	12	30	0.789	0.316	19	5	18	2	26	25	3	4	5	11	1	9	15	34	1	2	0	2	4	13
2020-01-17	qingdao	113	116	-3	lose	24	48	24	0.5	16	34	18	0.471	17	21	4	0.81	9	24	15	0.375	26	53	27	0.491	8	31	0.721	0.216	27	7	15	4	18	25	9	11	13	28	2	4	9	18	0	2	0	2	2	7
2020-01-17	ningbo	97	113	-16	lose	25	66	41	0.379	8	23	15	0.348	23	33	10	0.697	1	3	2	0.333	29	83	54	0.349	18	18	0.563	0.375	16	9	12	2	28	28	5	8	4	20	3	7	9	23	0	4	2	10	4	12
2020-01-17	jilin	102	94	8	win	28	54	26	0.519	9	29	20	0.31	19	22	3	0.864	4	7	3	0.571	31	74	43	0.419	18	33	0.75	0.409	18	8	20	2	24	23	5	8	7	19	3	8	8	20	0	1	1	2	7	16
2020-01-17	guangzhou	116	113	3	win	29	54	25	0.537	15	32	17	0.469	13	18	5	0.722	11	23	12	0.478	28	58	30	0.483	12	29	0.784	0.279	24	7	14	3	25	18	3	4	13	27	5	10	12	18	1	3	3	8	3	3
2020-01-17	fujian	113	97	16	win	35	52	17	0.673	7	28	21	0.25	22	25	3	0.88	2	5	3	0.4	37	72	35	0.514	14	30	0.625	0.438	27	5	15	10	28	28	6	9	7	19	1	3	8	16	3	6	4	5	2	8
2020-01-17	beikong	97	126	-29	lose	28	66	38	0.424	7	21	14	0.333	20	33	13	0.606	4	7	3	0.571	27	76	49	0.355	21	21	0.656	0.42	20	9	14	3	27	28	6	12	6	17	3	3	6	10	1	2	2	11	0	3
2020-01-17	beijing	91	87	4	win	25	56	31	0.446	6	18	12	0.333	23	25	2	0.92	5	8	3	0.625	23	63	40	0.365	8	26	0.684	0.211	17	8	10	5	25	26	4	8	5	14	2	4	12	23	2	7	2	7	2	7
2021-01-17	xinjiang	109	100	9	win	33	49	16	0.673	8	26	18	0.308	19	27	8	0.704	7	17	10	0.412	30	54	24	0.556	14	27	0.794	0.4	23	6	17	5	17	24	6	9	7	17	2	6	5	10	2	4	9	13	0	0
2021-01-17	tianjin	114	138	-24	lose	29	46	17	0.63	15	39	24	0.385	11	17	6	0.647	2	4	2	0.5	41	80	39	0.513	8	26	0.591	0.205	30	5	24	9	30	20	10	13	12	26	3	10	3	6	3	4	1	1	2	5
2021-01-17	sichuan	107	109	-2	lose	29	46	17	0.63	12	26	14	0.462	13	20	7	0.65	2	5	3	0.4	34	62	28	0.548	7	27	0.692	0.241	26	4	23	2	20	21	2	5	5	11	2	4	8	12	5	7	2	8	2	3
2021-01-17	shenzhen	113	107	6	win	25	48	23	0.521	17	36	19	0.472	12	16	4	0.75	17	33	16	0.515	23	49	26	0.469	13	27	0.711	0.317	19	6	15	1	21	23	6	11	3	8	3	5	3	11	4	7	0	3	2	6
2021-01-17	shandong	107	113	-6	lose	25	47	22	0.532	14	32	18	0.438	15	20	5	0.75	12	23	11	0.522	24	53	29	0.453	11	28	0.683	0.289	21	8	17	4	23	21	12	18	7	11	0	2	7	14	4	9	2	7	2	3
2021-01-17	nanjing	100	109	-9	lose	29	52	23	0.558	11	27	16	0.407	9	12	3	0.75	4	10	6	0.4	34	67	33	0.507	7	21	0.6	0.206	22	9	14	1	24	17	6	11	5	10	3	7	9	17	4	5	2	5	3	6
2021-01-17	jilin	109	107	2	win	37	63	26	0.587	7	24	17	0.292	14	19	5	0.737	4	9	5	0.444	37	75	38	0.493	12	22	0.759	0.308	22	14	11	4	21	20	12	12	8	18	3	9	12	19	2	4	0	0	8	13
2021-01-17	guangdong	138	114	24	win	41	74	33	0.554	8	23	15	0.348	32	43	11	0.744	1	3	2	0.333	40	86	46	0.465	18	31	0.795	0.409	23	13	17	4	20	30	9	23	6	15	2	4	12	18	1	2	2	3	6	13
2021-01-17	fujian	104	126	-22	lose	23	44	21	0.523	12	33	21	0.364	22	29	7	0.759	2	10	8	0.2	32	66	34	0.485	6	29	0.644	0.136	14	5	11	1	23	22	6	13	5	17	4	6	9	13	2	4	1	2	3	6
2021-01-17	beikong	126	104	22	win	37	63	26	0.587	12	29	17	0.414	16	27	11	0.593	8	16	8	0.5	37	72	35	0.514	16	38	0.864	0.356	35	4	9	1	22	23	8	13	3	11	7	10	8	20	2	5	2	5	0	2
2019-01-18	zhejiang	107	97	10	win	28	48	20	0.583	11	39	28	0.282	18	19	1	0.947	16	46	30	0.348	20	38	18	0.526	14	27	0.563	0.304	18	11	16	6	26	20	11	19	7	25	3	6	8	12	0	2	0	0	1	2
2019-01-18	tianjin	128	102	26	win	28	59	31	0.475	17	38	21	0.447	21	25	4	0.84	4	4	0	1	40	92	52	0.435	17	30	0.612	0.354	26	7	5	3	19	20	8	16	15	29	2	8	8	19	0	1	0	0	1	2
2019-01-18	shenzhen	115	103	12	win	29	50	21	0.58	15	34	19	0.441	12	18	6	0.667	9	16	7	0.563	33	66	33	0.5	9	31	0.66	0.231	22	8	12	2	20	18	7	10	6	16	4	6	9	15	0	0	1	4	2	2
2019-01-18	shanghai	102	128	-26	lose	34	70	36	0.486	5	20	15	0.25	19	24	5	0.792	2	4	2	0.5	35	84	49	0.417	19	31	0.646	0.388	20	5	10	3	20	19	10	16	4	16	1	4	8	18	1	3	4	6	0	1
2019-01-18	qingdao	97	107	-10	lose	28	60	32	0.467	7	28	21	0.25	20	32	12	0.625	11	35	24	0.314	24	53	29	0.453	21	32	0.696	0.438	14	8	16	1	20	26	10	19	2	16	5	15	10	21	2	4	1	2	1	3
2019-01-18	ningbo	104	91	13	win	33	62	29	0.532	7	23	16	0.304	17	23	6	0.739	3	13	10	0.231	36	71	35	0.507	14	31	0.795	0.35	17	5	9	3	21	21	4	6	9	16	3	4	14	25	1	3	5	11	6	13
2019-01-18	guangzhou	106	131	-25	lose	20	48	28	0.417	13	37	24	0.351	27	35	8	0.771	12	33	21	0.364	17	48	31	0.354	13	26	0.765	0.241	19	9	17	1	29	28	5	9	12	30	3	9	5	15	1	1	1	3	4	11
2019-01-18	guangsha	98	120	-22	lose	31	54	23	0.574	5	26	21	0.192	21	37	16	0.568	6	7	1	0.857	25	68	43	0.368	11	22	0.815	0.239	15	8	13	1	32	34	10	15	5	21	2	7	7	18	1	4	0	6	3	6
2019-01-18	guangdong	131	106	25	win	31	53	22	0.585	11	26	15	0.423	36	44	8	0.818	10	26	16	0.385	29	50	21	0.58	8	41	0.759	0.235	24	10	19	0	28	29	9	14	8	20	6	9	7	14	1	2	0	1	4	8
2019-01-18	fujian	103	115	-12	lose	34	58	24	0.586	7	31	24	0.226	14	19	5	0.737	5	16	11	0.313	31	68	37	0.456	16	30	0.769	0.34	20	6	16	2	18	20	8	11	8	30	9	15	11	22	0	0	0	1	2	4
2019-01-18	beikong	91	104	-13	lose	27	51	24	0.529	7	22	15	0.318	16	26	10	0.615	4	8	4	0.5	28	63	35	0.444	8	26	0.65	0.205	14	5	10	4	21	21	4	6	3	10	0	1	9	19	1	3	3	8	7	13
2019-01-18	beijing	120	98	22	win	37	52	15	0.712	7	19	12	0.368	25	33	8	0.758	2	8	6	0.25	38	59	21	0.644	5	35	0.761	0.185	21	9	15	1	34	32	8	10	5	13	4	10	19	28	1	1	1	3	2	4
2020-01-18	shanxi	96	86	10	win	25	61	36	0.41	9	32	23	0.281	19	26	7	0.731	7	18	11	0.389	26	74	48	0.351	18	32	0.627	0.327	18	13	9	7	26	22	5	12	9	27	3	8	7	18	1	4	3	5	1	4
2020-01-18	shandong	103	132	-29	lose	31	58	27	0.534	10	36	26	0.278	11	13	2	0.846	1	4	3	0.25	39	89	50	0.438	15	27	0.692	0.333	21	4	17	7	23	20	2	4	9	25	2	6	9	18	0	1	0	1	8	22
2020-01-18	nanjing	86	96	-10	lose	21	51	30	0.412	9	26	17	0.346	17	33	16	0.515	4	9	5	0.444	25	67	42	0.373	19	37	0.673	0.373	15	2	22	7	22	26	3	10	7	19	3	3	7	15	0	1	3	7	2	7
2020-01-18	guangdong	132	103	29	win	35	57	22	0.614	13	31	18	0.419	23	32	9	0.719	2	6	4	0.333	45	81	36	0.556	12	30	0.667	0.308	29	13	8	5	20	23	10	14	10	22	2	3	8	12	1	1	0	1	13	25
2021-01-18	zhejiang	96	86	10	win	15	42	27	0.357	16	47	31	0.34	18	28	10	0.643	11	35	24	0.314	19	53	34	0.358	14	29	0.63	0.28	16	8	6	4	22	26	6	12	12	26	1	7	4	12	2	6	0	0	0	2
2021-01-18	liaoning	104	96	8	win	32	53	21	0.604	8	28	20	0.286	16	20	4	0.8	7	13	6	0.538	31	66	35	0.47	11	31	0.861	0.297	21	7	8	5	16	25	6	8	8	20	3	5	4	7	3	6	1	5	0	3
2021-01-18	guangzhou	86	96	-10	lose	28	54	26	0.519	6	29	23	0.207	12	18	6	0.667	7	29	22	0.241	25	52	27	0.481	17	36	0.72	0.37	21	2	15	7	26	22	1	4	7	21	2	12	6	16	1	2	8	12	1	1
2021-01-18	beijing	96	104	-8	lose	21	42	21	0.5	13	30	17	0.433	15	18	3	0.833	9	13	4	0.692	24	58	34	0.414	5	26	0.703	0.139	24	3	12	5	25	16	3	6	10	23	1	5	5	13	5	5	3	4	2	3
2022-01-18	zhejiang	94	100	-6	lose	21	48	27	0.438	9	36	27	0.25	25	29	4	0.862	4	20	16	0.2	23	61	38	0.377	20	30	0.612	0.408	23	8	17	6	25	27	7	11	5	17	3	6	3	7	2	10	1	3	0	1
2022-01-18	xinjiang	103	89	14	win	25	53	28	0.472	12	28	16	0.429	17	21	4	0.81	5	9	4	0.556	30	70	40	0.429	13	35	0.686	0.351	36	9	14	4	17	17	10	14	11	26	1	5	1	5	1	2	5	11	0	1
2022-01-18	shenzhen	100	94	6	win	31	69	38	0.449	6	17	11	0.353	20	31	11	0.645	6	12	6	0.5	26	69	43	0.377	19	29	0.592	0.388	18	8	15	5	27	25	4	6	4	10	3	6	2	9	1	7	7	15	2	5
2022-01-18	shanghai	107	74	33	win	23	45	22	0.511	9	23	14	0.391	34	49	15	0.694	0	1	1	0	26	61	35	0.426	13	35	0.946	0.333	30	13	22	2	24	44	11	13	7	16	2	8	4	11	1	8	0	1	0	1
2022-01-18	shandong	89	103	-14	lose	16	42	26	0.381	15	37	22	0.405	12	21	9	0.571	7	17	10	0.412	23	61	38	0.377	16	24	0.649	0.314	29	9	16	0	17	17	5	10	10	19	1	7	2	8	0	3	2	6	2	3
2022-01-18	ningbo	96	124	-28	lose	27	56	29	0.482	11	21	10	0.524	9	11	2	0.818	3	6	3	0.5	34	70	36	0.486	6	19	0.452	0.158	19	3	10	8	28	16	1	3	4	9	3	9	6	12	3	5	4	7	4	9
2022-01-18	liaoning	110	98	12	win	29	48	19	0.604	14	33	19	0.424	10	10	0	1	6	15	9	0.4	35	64	29	0.547	10	25	0.781	0.313	26	7	8	2	18	10	6	11	7	16	3	5	8	13	3	4	0	2	4	6
2022-01-18	jiangsu	74	107	-33	lose	19	44	25	0.432	6	25	19	0.24	18	20	2	0.9	2	7	5	0.286	22	61	39	0.361	2	26	0.667	0.054	19	10	24	3	44	24	1	5	2	9	0	3	7	12	2	11	1	3	0	0
2022-01-18	guangzhou	98	110	-12	lose	30	53	23	0.566	10	24	14	0.417	8	12	4	0.667	6	15	9	0.4	32	60	28	0.533	7	22	0.688	0.219	19	3	10	5	10	18	7	11	3	9	4	11	6	10	1	7	3	5	3	3
2022-01-18	guangdong	108	104	4	win	29	49	20	0.592	11	26	15	0.423	17	23	6	0.739	2	5	3	0.4	37	69	32	0.536	13	30	0.789	0.394	36	10	17	1	20	22	8	10	3	8	2	3	7	9	5	8	3	7	2	3
2022-01-18	fujian	104	108	-4	lose	23	44	21	0.523	14	33	19	0.424	16	18	2	0.889	6	10	4	0.6	28	64	36	0.438	8	20	0.606	0.211	28	10	13	2	22	20	4	9	12	21	1	7	4	10	2	3	0	0	1	3
2022-01-18	beikong	124	96	28	win	42	77	35	0.545	4	12	8	0.333	28	35	7	0.8	5	10	5	0.5	36	74	38	0.486	23	32	0.842	0.548	23	5	7	6	16	28	6	7	5	13	3	8	9	15	1	5	10	12	4	8
2019-01-19	sichuan	86	126	-40	lose	27	50	23	0.54	6	30	24	0.2	14	22	8	0.636	9	37	28	0.243	22	41	19	0.537	15	32	0.711	0.341	19	2	21	5	18	20	5	11	5	21	2	6	2	9	0	3	2	3	0	4
2019-01-19	shandong	112	97	15	win	37	61	24	0.607	6	23	17	0.261	20	26	6	0.769	9	28	19	0.321	32	54	22	0.593	12	31	0.646	0.316	25	8	9	1	20	24	4	8	7	19	5	9	9	16	3	5	5	8	1	5
2019-01-19	nanjing	97	112	-15	lose	29	57	28	0.509	9	36	27	0.25	12	14	2	0.857	15	48	33	0.313	19	41	22	0.463	17	26	0.684	0.354	17	4	17	1	24	20	4	5	5	24	2	9	11	24	1	1	0	1	7	13
2019-01-19	liaoning	126	86	40	win	32	64	32	0.5	15	29	14	0.517	17	23	6	0.739	26	55	29	0.473	20	37	17	0.541	13	29	0.659	0.289	24	12	7	4	20	18	8	16	14	25	4	9	6	16	2	2	1	1	4	7
2020-01-19	zhejiang	118	102	16	win	30	50	20	0.6	13	35	22	0.371	19	23	4	0.826	1	6	5	0.167	39	76	37	0.513	11	24	0.649	0.268	25	11	7	4	21	26	9	14	4	20	5	12	11	21	5	9	0	0	3	5
2020-01-19	xinjiang	114	111	3	win	27	56	29	0.482	15	32	17	0.469	15	18	3	0.833	6	11	5	0.545	35	76	41	0.461	11	32	0.744	0.25	26	7	11	6	28	21	9	14	9	14	1	2	9	19	0	5	2	5	2	4
2020-01-19	tianjin	102	118	-16	lose	24	44	20	0.545	10	29	19	0.345	24	29	5	0.828	1	5	4	0.2	31	66	35	0.47	13	30	0.732	0.351	22	2	16	1	26	21	4	6	6	16	2	4	8	15	2	4	6	11	1	3
2020-01-19	sichuan	111	107	4	win	31	45	14	0.689	12	33	21	0.364	13	21	8	0.619	7	13	6	0.538	33	62	29	0.532	14	23	0.719	0.438	23	7	14	0	19	22	4	7	11	22	1	4	8	14	2	7	5	10	2	4
2020-01-19	shenzhen	106	113	-7	lose	33	55	22	0.6	5	18	13	0.278	25	44	19	0.568	7	26	19	0.269	25	41	16	0.61	10	33	0.702	0.238	8	9	19	4	29	33	12	17	4	11	3	9	10	18	0	1	2	3	1	5
2020-01-19	shanghai	113	106	7	win	36	68	32	0.529	5	18	13	0.278	26	40	14	0.65	8	26	18	0.308	30	57	27	0.526	14	32	0.762	0.298	16	14	13	2	33	29	6	9	3	12	4	13	13	24	2	3	1	5	2	4
2020-01-19	qingdao	112	110	2	win	27	62	35	0.435	12	34	22	0.353	22	26	4	0.846	2	6	4	0.333	33	86	53	0.384	17	33	0.846	0.333	21	9	10	3	28	26	2	3	9	27	5	9	7	20	0	0	0	1	9	30
2020-01-19	ningbo	95	107	-12	lose	30	55	25	0.545	5	19	14	0.263	20	24	4	0.833	2	9	7	0.222	32	64	32	0.5	11	23	0.767	0.333	19	5	17	2	26	20	5	8	7	23	4	8	10	17	0	0	5	7	1	4
2020-01-19	liaoning	111	114	-3	lose	25	53	28	0.472	10	28	18	0.357	31	38	7	0.816	9	10	1	0.9	24	69	45	0.348	11	33	0.75	0.256	24	9	10	6	21	28	8	12	9	19	1	5	7	20	0	5	0	3	4	10
2020-01-19	jilin	107	95	12	win	30	49	19	0.612	8	21	13	0.381	23	31	8	0.742	1	4	3	0.25	32	61	29	0.525	7	22	0.667	0.233	16	9	15	2	20	26	9	10	3	11	3	7	12	22	1	3	2	3	3	6
2020-01-19	jiangsu	79	86	-7	lose	27	58	31	0.466	4	19	15	0.211	13	17	4	0.765	6	18	12	0.333	20	54	34	0.37	13	28	0.757	0.302	17	8	15	5	25	20	5	8	4	22	2	4	2	9	1	1	3	6	2	7
2020-01-19	guangzhou	107	111	-4	lose	26	43	17	0.605	14	35	21	0.4	13	15	2	0.867	7	12	5	0.583	32	65	33	0.492	9	18	0.563	0.281	22	9	10	2	22	19	4	8	7	12	3	7	10	15	0	2	6	9	7	11
2020-01-19	guangsha	95	90	5	win	29	64	35	0.453	6	16	10	0.375	19	28	9	0.679	3	10	7	0.3	27	65	38	0.415	9	35	0.745	0.225	28	7	14	6	19	25	10	20	4	11	3	10	9	24	2	5	2	3	2	7
2020-01-19	fujian	110	112	-2	lose	26	47	21	0.553	14	29	15	0.483	16	23	7	0.696	5	11	6	0.455	31	61	30	0.508	6	34	0.667	0.154	26	4	14	9	26	28	2	3	9	19	2	5	4	11	0	0	0	1	12	26
2020-01-19	beikong	90	95	-5	lose	28	55	27	0.509	6	30	24	0.2	16	21	5	0.762	7	19	12	0.368	26	65	39	0.4	12	31	0.775	0.255	29	9	13	3	25	19	3	10	6	16	4	14	11	33	0	2	2	4	1	5
2020-01-19	beijing	86	79	7	win	18	41	23	0.439	11	24	13	0.458	17	26	9	0.654	12	20	8	0.6	16	44	28	0.364	9	30	0.698	0.243	21	6	15	2	20	25	4	5	9	19	2	6	4	9	1	2	0	5	1	7
2021-01-19	xinjiang	65	87	-22	lose	20	51	31	0.392	2	23	21	0.087	19	27	8	0.704	0	11	11	0	21	62	41	0.339	11	28	0.718	0.22	16	9	16	2	27	27	2	13	2	14	3	9	4	6	0	2	4	10	1	2
2021-01-19	tianjin	117	113	4	win	30	48	18	0.625	11	41	30	0.268	24	35	11	0.686	17	43	26	0.395	20	42	22	0.476	14	32	0.744	0.311	28	11	11	5	24	29	7	14	6	30	5	6	2	5	2	2	0	5	1	2
2021-01-19	sichuan	97	93	4	win	22	45	23	0.489	13	45	32	0.289	14	20	6	0.7	11	30	19	0.367	22	58	36	0.379	14	40	0.816	0.264	16	4	9	6	21	21	4	11	8	29	3	5	5	8	0	0	5	10	0	0
2021-01-19	jilin	106	111	-5	lose	24	54	30	0.444	12	36	24	0.333	22	26	4	0.846	7	19	12	0.368	26	68	42	0.382	19	29	0.784	0.373	20	5	15	1	27	22	5	11	8	21	2	7	5	14	1	2	0	2	5	15
2021-01-19	guangsha	87	65	22	win	26	58	32	0.448	5	15	10	0.333	20	26	6	0.769	5	17	12	0.294	22	52	30	0.423	11	39	0.78	0.282	26	10	18	2	27	27	9	17	1	8	1	5	3	10	2	4	2	7	1	4
2021-01-19	guangdong	111	106	5	win	31	55	24	0.564	9	25	16	0.36	22	29	7	0.759	5	12	7	0.417	30	63	33	0.476	8	32	0.627	0.216	18	4	15	6	22	27	15	22	5	11	3	7	7	12	0	3	1	3	2	6
2021-01-19	fujian	113	117	-4	lose	25	51	26	0.49	13	35	22	0.371	24	33	9	0.727	10	32	22	0.313	22	48	26	0.458	11	31	0.689	0.256	19	7	13	2	29	24	6	14	5	14	2	6	11	17	3	5	1	4	3	6
2021-01-19	beikong	93	97	-4	lose	17	48	31	0.354	16	35	19	0.457	11	20	9	0.55	6	15	9	0.4	23	64	41	0.359	9	39	0.736	0.184	19	6	11	5	21	21	4	12	10	22	4	9	4	13	1	3	0	2	1	4
2022-01-19	tianjin	126	114	12	win	19	34	15	0.559	21	40	19	0.525	25	28	3	0.893	4	5	1	0.8	34	67	33	0.507	8	26	0.605	0.25	28	6	12	6	21	22	4	6	10	17	2	8	7	13	4	6	0	0	5	6
2022-01-19	sichuan	98	87	11	win	28	62	34	0.452	9	22	13	0.409	15	15	0	1	1	4	3	0.25	33	77	44	0.429	16	33	0.786	0.39	23	5	14	4	19	24	2	7	4	11	3	8	9	12	5	10	2	6	1	2
2022-01-19	shanxi	122	118	4	win	29	55	26	0.527	16	32	16	0.5	16	19	3	0.842	5	9	4	0.556	37	75	38	0.493	11	29	0.725	0.275	32	6	11	4	23	21	8	15	8	15	6	12	7	17	1	4	2	2	1	2
2022-01-19	qingdao	87	98	-11	lose	25	45	20	0.556	10	36	26	0.278	7	12	5	0.583	8	20	12	0.4	25	59	34	0.424	9	25	0.61	0.214	14	7	11	3	24	19	3	12	5	18	4	6	8	8	3	5	1	1	1	1
2022-01-19	nanjing	81	112	-31	lose	26	49	23	0.531	8	27	19	0.296	5	6	1	0.833	1	6	5	0.167	31	68	37	0.456	9	24	0.558	0.225	17	5	18	3	21	10	5	9	7	15	2	13	6	11	0	3	2	3	2	2
2022-01-19	jilin	112	81	31	win	39	58	19	0.672	6	31	25	0.194	16	24	8	0.667	2	6	4	0.333	37	77	40	0.481	19	31	0.775	0.442	30	13	9	3	10	21	11	17	8	22	3	9	5	7	2	6	1	2	0	4
2022-01-19	guangsha	118	122	-4	lose	26	47	21	0.553	17	40	23	0.425	15	20	5	0.75	7	14	7	0.5	30	67	37	0.448	11	29	0.725	0.275	32	5	11	8	21	23	4	9	6	16	2	4	7	12	6	15	4	4	1	1
2022-01-19	beijing	114	126	-12	lose	31	55	24	0.564	11	30	19	0.367	19	24	5	0.792	6	7	1	0.857	31	73	42	0.425	17	24	0.75	0.395	22	5	11	3	22	21	5	8	8	16	1	5	8	12	3	6	2	3	1	1
2019-01-20	zhejiang	100	99	1	win	16	38	22	0.421	15	34	19	0.441	23	30	7	0.767	14	31	17	0.452	15	39	24	0.385	14	25	0.714	0.378	18	7	14	6	18	32	5	8	6	16	4	8	5	12	0	0	0	1	4	8
2019-01-20	xinjiang	98	110	-12	lose	25	48	23	0.521	10	38	28	0.263	18	27	9	0.667	3	13	10	0.231	31	72	41	0.431	13	24	0.615	0.277	18	11	15	3	20	26	8	15	3	15	2	4	5	13	0	1	5	12	1	5
2019-01-20	tianjin	93	107	-14	lose	19	43	24	0.442	13	38	25	0.342	16	22	6	0.727	17	48	31	0.354	14	32	18	0.438	7	36	0.72	0.146	12	6	12	3	13	18	3	7	7	20	5	9	8	19	1	3	0	2	6	16
2019-01-20	shenzhen	107	93	14	win	26	49	23	0.531	16	45	29	0.356	7	14	7	0.5	17	52	35	0.327	23	40	17	0.575	14	41	0.854	0.28	29	7	12	2	18	13	14	17	7	33	1	5	4	10	1	3	0	1	3	6
2019-01-20	shanxi	114	110	4	win	30	57	27	0.526	4	20	16	0.2	42	52	10	0.808	9	26	17	0.346	19	45	26	0.422	12	24	0.571	0.279	16	6	6	3	33	36	6	6	3	14	4	12	9	21	2	4	0	2	5	12
2019-01-20	shanghai	116	106	10	win	36	62	26	0.581	10	24	14	0.417	14	23	9	0.609	3	14	11	0.214	38	67	29	0.567	14	32	0.744	0.333	24	5	7	7	20	25	10	14	4	12	2	5	11	22	7	13	1	1	0	1
2019-01-20	qingdao	99	106	-7	lose	34	58	24	0.586	5	21	16	0.238	16	23	7	0.696	4	13	9	0.308	32	63	31	0.508	10	22	0.579	0.278	14	9	21	1	20	24	11	15	6	15	4	10	9	19	1	5	5	7	3	8
2019-01-20	ningbo	86	103	-17	lose	24	52	28	0.462	5	24	19	0.208	23	33	10	0.697	7	29	22	0.241	20	45	25	0.444	9	30	0.698	0.231	12	14	16	4	19	26	6	17	4	16	2	6	8	15	0	1	4	10	3	5
2019-01-20	jilin	110	98	12	win	35	57	22	0.614	7	25	18	0.28	19	26	7	0.731	7	15	8	0.467	33	65	32	0.508	15	34	0.723	0.385	18	6	19	2	26	20	5	11	5	19	8	16	9	18	0	1	9	11	2	3
2019-01-20	jiangsu	110	114	-4	lose	30	53	23	0.566	8	31	23	0.258	26	34	8	0.765	5	19	14	0.263	27	59	32	0.458	18	31	0.721	0.429	30	4	17	7	36	33	13	19	4	16	5	14	4	9	0	1	1	3	1	5
2019-01-20	guangsha	106	99	7	win	29	57	28	0.509	11	25	14	0.44	15	24	9	0.625	7	18	11	0.389	33	64	31	0.516	16	26	0.722	0.421	27	13	17	4	24	20	9	12	9	29	2	6	2	9	0	2	2	7	0	3
2019-01-20	guangdong	103	86	17	win	33	64	31	0.516	9	20	11	0.45	10	20	10	0.5	8	23	15	0.348	30	57	27	0.526	13	30	0.769	0.302	19	12	19	9	26	19	16	22	4	10	2	5	6	17	0	1	3	6	1	6
2019-01-20	beikong	106	116	-10	lose	22	43	21	0.512	16	43	27	0.372	14	16	2	0.875	3	12	9	0.25	33	72	39	0.458	11	28	0.667	0.256	28	5	9	2	25	20	6	10	5	18	0	2	7	14	2	4	3	4	1	2
2019-01-20	beijing	99	100	-1	lose	32	58	26	0.552	7	18	11	0.389	14	20	6	0.7	8	17	9	0.471	25	53	28	0.472	10	23	0.622	0.286	17	9	13	7	32	18	7	9	2	9	3	5	12	20	7	8	1	6	2	3
2021-01-20	shanghai	108	106	2	win	23	52	29	0.442	11	31	20	0.355	29	38	9	0.763	9	30	21	0.3	22	50	28	0.44	16	29	0.906	0.348	21	7	9	1	23	31	6	11	6	12	2	6	6	16	1	7	0	3	2	4
2021-01-20	shandong	111	73	38	win	22	44	22	0.5	14	36	22	0.389	25	33	8	0.758	12	25	13	0.48	19	50	31	0.38	15	40	0.816	0.357	21	15	15	3	23	26	11	17	9	23	1	9	6	12	1	3	3	5	3	7
2021-01-20	nanjing	106	108	-2	lose	24	45	21	0.533	10	25	15	0.4	28	32	4	0.875	6	27	21	0.222	24	39	15	0.615	3	30	0.652	0.094	21	5	11	7	31	23	7	10	4	12	1	4	4	11	3	5	6	8	3	3
2021-01-20	jiangsu	73	111	-38	lose	14	42	28	0.333	8	29	21	0.276	21	29	8	0.724	7	22	15	0.318	14	48	34	0.292	9	27	0.643	0.184	12	7	21	1	26	23	3	7	1	7	0	1	1	9	3	4	1	3	2	7
2022-01-20	zhejiang	108	68	40	win	26	48	22	0.542	11	29	18	0.379	23	23	0	1	10	19	9	0.526	23	54	31	0.426	17	30	0.833	0.447	26	7	20	4	25	22	8	13	12	23	4	7	2	6	2	7	1	2	0	1
2022-01-20	xinjiang	109	87	22	win	29	62	33	0.468	12	25	13	0.48	15	20	5	0.75	5	9	4	0.556	33	75	42	0.44	22	34	0.773	0.489	29	7	15	4	23	20	10	17	8	18	4	9	5	11	1	1	5	13	1	1
2022-01-20	shenzhen	119	103	16	win	27	45	18	0.6	14	34	20	0.412	23	30	7	0.767	7	13	6	0.538	29	61	32	0.475	9	41	0.788	0.25	31	14	27	8	27	27	9	13	5	9	3	7	9	16	1	1	2	5	4	11
2022-01-20	shanghai	103	119	-16	lose	29	56	27	0.518	7	27	20	0.259	24	34	10	0.706	2	7	5	0.286	29	71	42	0.408	11	27	0.75	0.212	22	16	20	2	27	27	10	15	6	15	5	11	8	16	0	1	6	11	3	11
2022-01-20	shandong	114	92	22	win	26	45	19	0.578	17	32	15	0.531	11	13	2	0.846	6	14	8	0.429	34	60	26	0.567	8	23	0.639	0.25	28	7	16	5	25	20	7	14	9	15	5	6	10	12	2	5	4	7	1	3
2022-01-20	ningbo	92	114	-22	lose	27	52	25	0.519	8	21	13	0.381	14	17	3	0.824	6	9	3	0.667	27	62	35	0.435	13	24	0.75	0.361	22	9	23	0	20	25	3	7	8	17	6	11	3	7	1	2	2	4	2	3
2022-01-20	liaoning	87	109	-22	lose	25	58	33	0.431	7	25	18	0.28	16	17	1	0.941	3	8	5	0.375	28	74	46	0.378	10	23	0.511	0.227	24	7	12	6	20	23	5	6	8	16	2	5	2	9	0	2	1	4	0	5
2022-01-20	jiangsu	68	108	-40	lose	21	41	20	0.512	5	22	17	0.227	11	16	5	0.688	3	10	7	0.3	21	51	30	0.412	6	21	0.553	0.167	10	10	21	1	22	25	6	10	0	4	6	12	10	15	3	7	1	5	1	2
2020-01-21	zhejiang	90	100	-10	lose	28	46	18	0.609	6	31	25	0.194	16	22	6	0.727	10	31	21	0.323	20	42	22	0.476	10	24	0.571	0.222	15	10	10	1	29	24	3	8	5	13	2	4	11	18	0	4	2	3	4	7
2020-01-21	xinjiang	101	112	-11	lose	32	61	29	0.525	8	32	24	0.25	13	20	7	0.65	4	22	18	0.182	33	68	35	0.485	13	29	0.69	0.255	18	9	11	3	22	18	6	13	6	19	0	0	11	28	1	5	4	9	2	6
2020-01-21	tianjin	98	88	10	win	21	51	30	0.412	13	34	21	0.382	17	21	4	0.81	7	13	6	0.538	26	71	45	0.366	11	35	0.729	0.22	18	9	9	4	30	26	1	3	9	26	4	7	9	23	2	4	2	6	2	6
2020-01-21	sichuan	88	98	-10	lose	23	48	25	0.479	5	30	25	0.167	27	36	9	0.75	2	9	7	0.222	24	67	43	0.358	13	39	0.78	0.271	15	5	14	4	26	30	3	6	6	29	3	6	8	14	0	4	1	6	0	2
2020-01-21	shenzhen	120	97	23	win	33	46	13	0.717	12	25	13	0.48	18	22	4	0.818	7	11	4	0.636	32	54	22	0.593	3	38	0.884	0.12	22	4	15	2	25	23	5	5	7	14	3	5	15	20	2	5	4	10	8	12
2020-01-21	shanxi	91	127	-36	lose	20	49	29	0.408	8	30	22	0.267	27	32	5	0.844	3	21	18	0.143	24	57	33	0.421	9	31	0.756	0.196	17	4	17	2	22	27	3	11	5	22	3	10	9	22	1	2	0	1	2	13
2020-01-21	shanghai	90	103	-13	lose	25	47	22	0.532	5	20	15	0.25	25	38	13	0.658	4	14	10	0.286	22	49	27	0.449	6	29	0.744	0.158	15	5	14	4	21	31	6	12	3	13	6	12	9	16	0	0	2	3	1	3
2020-01-21	shandong	109	122	-13	lose	24	54	30	0.444	13	41	28	0.317	22	27	5	0.815	14	42	28	0.333	20	50	30	0.4	18	30	0.769	0.321	21	10	14	6	29	30	5	15	5	11	1	4	3	15	4	7	2	6	1	5
2020-01-21	qingdao	122	109	13	win	27	47	20	0.574	14	33	19	0.424	26	37	11	0.703	19	34	15	0.559	18	42	24	0.429	9	38	0.679	0.231	17	9	15	4	30	29	12	17	7	17	1	6	5	18	1	1	4	6	1	4
2020-01-21	ningbo	88	114	-26	lose	26	58	32	0.448	5	25	20	0.2	21	27	6	0.778	2	10	8	0.2	28	72	44	0.389	14	30	0.789	0.304	12	7	14	4	22	25	3	6	7	24	1	7	11	21	0	1	1	5	9	18
2020-01-21	nanjing	106	132	-26	lose	30	51	21	0.588	10	32	22	0.313	16	22	6	0.727	3	12	9	0.25	35	69	34	0.507	10	26	0.591	0.256	23	8	24	6	29	24	5	10	7	20	4	8	9	16	0	1	1	1	3	7
2020-01-21	liaoning	100	90	10	win	30	56	26	0.536	6	18	12	0.333	22	31	9	0.71	6	18	12	0.333	27	53	26	0.509	18	35	0.778	0.429	19	6	19	3	24	29	6	9	4	11	1	6	10	17	3	4	2	5	4	5
2020-01-21	jilin	127	91	36	win	33	60	27	0.55	10	26	16	0.385	31	33	2	0.939	9	16	7	0.563	30	66	36	0.455	10	37	0.804	0.244	21	10	8	8	27	22	8	10	5	15	1	3	10	19	1	2	3	5	5	14
2020-01-21	jiangsu	103	90	13	win	29	56	27	0.518	9	24	15	0.375	18	22	4	0.818	8	23	15	0.348	26	53	27	0.491	10	32	0.842	0.256	24	7	14	4	31	21	7	15	7	16	1	3	10	15	1	1	2	5	1	3
2020-01-21	guangzhou	97	120	-23	lose	24	46	22	0.522	12	35	23	0.343	13	19	6	0.684	2	9	7	0.222	32	70	38	0.457	5	22	0.88	0.116	10	10	9	1	23	25	3	3	5	23	6	6	12	22	2	3	5	11	8	19
2020-01-21	guangsha	132	106	26	win	40	71	31	0.563	11	25	14	0.44	19	27	8	0.704	6	12	6	0.5	40	79	39	0.506	18	29	0.744	0.409	35	11	17	4	24	28	8	18	12	25	6	10	11	20	2	4	2	2	2	2
2020-01-21	guangdong	112	101	11	win	32	61	29	0.525	9	26	17	0.346	21	22	1	0.955	7	19	12	0.368	32	66	34	0.485	13	38	0.745	0.31	20	7	13	1	18	22	8	12	5	14	1	6	16	45	2	3	0	2	7	20
2020-01-21	fujian	114	88	26	win	27	52	25	0.519	16	29	13	0.552	12	20	8	0.6	3	9	6	0.333	36	68	32	0.529	8	32	0.696	0.211	21	11	14	7	25	22	8	8	11	22	3	6	8	17	0	1	2	4	8	18
2020-01-21	beikong	108	92	16	win	30	56	26	0.536	8	21	13	0.381	24	35	11	0.686	9	18	9	0.5	26	56	30	0.464	9	32	0.865	0.257	26	11	13	5	25	25	6	8	12	22	4	12	9	21	1	1	0	1	6	14
2020-01-21	beijing	92	108	-16	lose	23	40	17	0.575	10	34	24	0.294	16	28	12	0.571	5	15	10	0.333	25	56	31	0.446	5	26	0.743	0.135	19	8	16	4	25	25	6	6	9	24	3	11	7	14	0	2	0	1	3	8
2021-01-21	zhejiang	107	117	-10	lose	28	54	26	0.519	7	33	26	0.212	30	37	7	0.811	10	33	23	0.303	22	51	29	0.431	16	24	0.727	0.348	16	8	11	5	30	28	6	12	4	15	1	5	6	12	2	5	2	4	2	2
2021-01-21	tianjin	82	122	-40	lose	15	37	22	0.405	14	50	36	0.28	10	12	2	0.833	5	23	18	0.217	24	64	40	0.375	18	23	0.639	0.321	19	5	18	6	23	14	6	10	9	36	2	7	3	8	1	4	2	7	1	4
2021-01-21	shanxi	94	103	-9	lose	23	59	36	0.39	10	25	15	0.4	18	25	7	0.72	6	14	8	0.429	24	67	43	0.358	12	28	0.622	0.245	16	6	12	5	30	26	6	10	5	7	0	5	2	14	2	5	5	6	1	5
2021-01-21	qingdao	103	94	9	win	31	52	21	0.596	8	27	19	0.296	17	33	16	0.515	4	19	15	0.211	29	54	25	0.537	17	37	0.755	0.378	24	6	22	12	26	30	5	6	6	23	4	10	6	13	1	2	6	8	0	0
2021-01-21	liaoning	117	107	10	win	34	59	25	0.576	7	17	10	0.412	28	37	9	0.757	6	18	12	0.333	31	54	23	0.574	9	30	0.652	0.273	23	5	14	6	28	30	8	11	3	10	2	7	7	14	3	7	2	3	1	2
2021-01-21	jilin	105	104	1	win	30	55	25	0.545	11	28	17	0.393	12	21	9	0.571	6	12	6	0.5	32	68	36	0.471	17	26	0.591	0.405	18	7	12	3	28	22	5	8	8	13	2	4	7	15	1	2	0	0	5	10
2021-01-21	guangsha	104	105	-1	lose	35	72	37	0.486	5	17	12	0.294	19	24	5	0.792	1	10	9	0.1	35	75	40	0.467	18	25	0.595	0.409	17	4	11	3	22	28	2	4	3	14	3	10	5	16	1	2	5	9	2	4
2021-01-21	beikong	122	82	40	win	37	57	20	0.649	9	20	11	0.45	21	29	8	0.724	6	9	3	0.667	36	64	28	0.563	13	38	0.679	0.361	24	11	14	2	14	23	11	18	7	12	7	11	11	16	2	2	2	6	1	5
2022-01-21	tianjin	91	118	-27	lose	22	46	24	0.478	12	34	22	0.353	11	15	4	0.733	3	7	4	0.429	28	70	42	0.4	10	21	0.656	0.227	22	9	13	2	21	24	3	8	7	14	7	12	4	5	1	3	2	5	2	10
2022-01-21	sichuan	69	98	-29	lose	16	44	28	0.364	10	26	16	0.385	7	13	6	0.538	2	3	1	0.667	21	64	43	0.328	7	28	0.571	0.156	21	4	17	3	18	19	2	8	5	10	4	11	3	13	3	7	1	8	1	2
2022-01-21	shanxi	116	100	16	win	31	52	21	0.596	11	34	23	0.324	21	24	3	0.875	2	4	2	0.5	35	77	42	0.455	14	29	0.829	0.341	28	10	11	2	24	23	6	7	8	19	2	4	3	9	2	4	6	10	1	6
2022-01-21	qingdao	105	116	-11	lose	28	61	33	0.459	10	30	20	0.333	19	22	3	0.864	4	10	6	0.4	30	77	47	0.39	20	30	0.625	0.417	28	3	11	3	23	24	7	17	6	18	5	18	5	14	2	2	2	3	0	3
2022-01-21	nanjing	100	116	-16	lose	24	43	19	0.558	12	27	15	0.444	16	24	8	0.667	3	7	4	0.429	29	59	30	0.492	6	27	0.659	0.171	27	6	16	6	23	24	6	6	6	15	2	4	2	6	2	2	1	3	2	7
2022-01-21	jilin	101	94	7	win	31	55	24	0.564	7	25	18	0.28	18	22	4	0.818	2	6	4	0.333	36	74	38	0.486	10	24	0.545	0.263	20	8	10	1	27	23	5	9	4	11	4	11	13	25	3	5	2	2	5	16
2022-01-21	guangsha	94	101	-7	lose	21	37	16	0.568	10	39	29	0.256	22	30	8	0.733	5	12	7	0.417	22	60	38	0.367	20	28	0.737	0.455	18	3	19	4	23	27	5	8	4	22	1	5	3	7	1	2	2	3	0	2
2022-01-21	guangdong	118	91	27	win	32	42	10	0.762	14	38	24	0.368	12	15	3	0.8	2	4	2	0.5	41	73	32	0.562	11	34	0.773	0.344	34	7	13	3	24	21	8	12	6	15	3	7	8	10	2	8	0	2	5	5
2022-01-21	fujian	116	105	11	win	30	56	26	0.536	14	38	24	0.368	14	17	3	0.824	2	6	4	0.333	37	83	46	0.446	18	28	0.583	0.375	25	8	10	4	24	23	5	9	7	18	4	13	7	10	2	5	0	0	2	6
2022-01-21	beijing	98	69	29	win	27	59	32	0.458	11	30	19	0.367	11	14	3	0.786	2	4	2	0.5	34	83	49	0.41	21	38	0.844	0.429	23	11	15	4	19	18	4	14	5	11	3	10	7	16	3	5	0	2	2	5
2019-01-22	xinjiang	103	117	-14	lose	31	59	28	0.525	8	26	18	0.308	17	18	1	0.944	6	15	9	0.4	30	67	37	0.448	8	27	0.6	0.186	19	11	17	3	18	20	12	19	2	8	5	8	8	17	0	2	3	8	1	3
2019-01-22	tianjin	119	124	-5	lose	26	45	19	0.578	18	34	16	0.529	13	16	3	0.813	20	34	14	0.588	20	41	21	0.488	11	35	0.714	0.333	18	2	23	2	28	23	6	10	11	24	5	10	6	9	0	0	0	1	12	20
2019-01-22	sichuan	121	112	9	win	32	48	16	0.667	12	34	22	0.353	21	24	3	0.875	13	25	12	0.52	25	51	26	0.49	11	30	0.588	0.333	29	5	14	7	23	18	15	18	8	22	4	6	4	7	0	1	0	2	2	4
2019-01-22	shenzhen	113	106	7	win	27	48	21	0.563	10	24	14	0.417	29	36	7	0.806	4	5	1	0.8	27	61	34	0.443	8	27	0.75	0.242	18	7	15	9	19	30	7	12	9	23	3	8	11	22	0	0	1	3	3	5
2019-01-22	shanghai	108	110	-2	lose	27	52	25	0.519	12	27	15	0.444	18	23	5	0.783	3	7	4	0.429	34	70	36	0.486	10	30	0.732	0.244	18	8	17	5	24	18	11	19	7	18	1	5	7	14	1	1	2	4	0	0
2019-01-22	shandong	110	108	2	win	36	61	25	0.59	8	29	21	0.276	14	18	4	0.778	3	8	5	0.375	39	80	41	0.488	11	31	0.756	0.268	29	9	12	2	18	24	11	16	10	29	3	8	6	17	2	2	1	1	0	0
2019-01-22	qingdao	112	121	-9	lose	29	58	29	0.5	8	37	29	0.216	30	36	6	0.833	8	24	16	0.333	25	67	42	0.373	21	22	0.667	0.412	14	8	7	4	18	23	3	11	7	29	5	11	8	15	0	1	4	5	2	5
2019-01-22	liaoning	117	103	14	win	40	70	30	0.571	9	30	21	0.3	10	11	1	0.909	8	18	10	0.444	38	79	41	0.481	18	35	0.814	0.4	21	15	15	7	20	18	9	17	5	17	6	13	9	18	5	6	2	4	2	4
2019-01-22	jilin	107	118	-11	lose	30	49	19	0.612	12	35	23	0.343	11	14	3	0.786	10	21	11	0.476	30	61	31	0.492	9	21	0.477	0.231	23	7	10	5	24	19	9	12	10	23	5	6	9	12	5	11	0	2	0	5
2019-01-22	jiangsu	106	113	-7	lose	31	55	24	0.564	10	24	14	0.417	14	18	4	0.778	7	9	2	0.778	32	68	36	0.471	9	25	0.758	0.25	17	9	17	3	30	19	9	13	14	25	4	7	10	24	0	2	3	6	1	5
2019-01-22	guangsha	118	107	11	win	29	61	32	0.475	12	29	17	0.414	24	29	5	0.828	7	13	6	0.538	31	74	43	0.419	23	30	0.769	0.523	27	7	11	2	19	24	4	6	11	23	3	5	6	17	2	4	3	9	2	6
2019-01-22	guangdong	124	119	5	win	38	68	30	0.559	8	27	19	0.296	24	32	8	0.75	11	33	22	0.333	29	56	27	0.518	14	22	0.667	0.286	16	16	7	3	23	28	15	22	9	32	7	10	8	11	0	0	1	2	1	5
2021-01-22	sichuan	92	107	-15	lose	30	57	27	0.526	5	21	16	0.238	17	23	6	0.739	6	16	10	0.375	28	61	33	0.459	10	32	0.681	0.238	20	10	22	3	23	21	6	13	5	14	2	4	5	14	2	6	3	7	1	4
2021-01-22	nanjing	104	90	14	win	22	42	20	0.524	13	34	21	0.382	21	27	6	0.778	12	30	18	0.4	20	43	23	0.465	13	36	0.783	0.351	19	3	18	3	27	23	7	11	5	17	4	8	3	9	3	7	3	7	2	4
2021-01-22	jiangsu	94	119	-25	lose	27	63	36	0.429	9	28	19	0.321	13	19	6	0.684	7	22	15	0.318	28	68	40	0.412	18	19	0.594	0.34	17	9	12	3	27	26	3	12	6	16	3	10	9	18	4	6	0	3	2	3
2021-01-22	guangzhou	119	94	25	win	26	48	22	0.542	14	27	13	0.519	25	30	5	0.833	8	17	9	0.471	29	55	26	0.527	13	35	0.66	0.406	22	5	20	5	26	27	6	6	9	23	4	12	8	13	1	3	4	8	1	1
2021-01-22	guangdong	107	92	15	win	36	65	29	0.554	6	21	15	0.286	17	24	7	0.708	8	14	6	0.571	31	69	38	0.449	15	32	0.762	0.319	25	7	19	5	21	23	13	19	6	12	1	4	6	16	3	9	0	4	0	5
2021-01-22	fujian	90	104	-14	lose	23	45	22	0.511	8	31	23	0.258	20	30	10	0.667	7	26	19	0.269	22	48	26	0.458	10	24	0.649	0.217	9	10	12	0	23	27	3	9	3	14	0	7	7	15	1	4	3	4	6	7
2022-01-22	zhejiang	85	91	-6	lose	23	52	29	0.442	6	27	21	0.222	21	26	5	0.808	3	13	10	0.231	23	63	40	0.365	10	23	0.657	0.238	18	10	15	7	32	27	3	9	1	11	2	3	10	19	3	4	0	2	1	4
2022-01-22	xinjiang	114	91	23	win	34	55	21	0.618	8	20	12	0.4	22	27	5	0.815	4	7	3	0.571	34	64	30	0.531	10	30	0.652	0.294	28	12	14	4	18	22	7	9	9	18	3	10	4	8	0	1	8	11	2	3
2022-01-22	shenzhen	90	80	10	win	19	40	21	0.475	11	26	15	0.423	19	27	8	0.704	3	7	4	0.429	26	58	32	0.448	8	30	0.811	0.222	24	9	18	5	19	23	1	4	11	22	4	9	8	13	0	0	0	3	3	5
2022-01-22	shanghai	91	85	6	win	21	51	30	0.412	7	19	12	0.368	28	36	8	0.778	4	8	4	0.5	19	57	38	0.333	12	32	0.762	0.343	22	9	23	8	27	32	3	9	4	8	3	8	5	12	5	10	5	13	0	4
2022-01-22	shandong	106	116	-10	lose	17	35	18	0.486	18	38	20	0.474	18	20	2	0.9	4	5	1	0.8	31	68	37	0.456	6	25	0.862	0.176	28	4	13	2	29	22	7	12	7	12	2	9	2	9	2	5	1	3	0	2
2022-01-22	ningbo	91	114	-23	lose	27	65	38	0.415	8	18	10	0.444	13	18	5	0.722	1	6	5	0.167	34	77	43	0.442	16	24	0.706	0.348	19	7	17	1	22	18	4	5	5	11	2	11	3	11	2	5	2	11	0	2
2022-01-22	liaoning	85	80	5	win	18	43	25	0.419	12	37	25	0.324	13	19	6	0.684	7	16	9	0.438	20	61	41	0.328	7	28	0.757	0.152	23	12	13	8	20	22	4	9	8	22	3	11	4	13	1	1	0	1	0	6
2022-01-22	jiangsu	80	90	-10	lose	28	56	28	0.5	3	15	12	0.2	15	19	4	0.789	3	8	5	0.375	28	63	35	0.444	7	28	0.778	0.189	22	12	16	1	23	19	6	8	1	7	4	7	6	13	2	5	3	9	4	6
2022-01-22	guangzhou	116	106	10	win	23	44	21	0.523	15	27	12	0.556	25	32	7	0.781	6	10	4	0.6	30	59	29	0.508	4	28	0.824	0.138	33	7	11	1	22	29	8	11	9	18	4	9	2	9	2	4	0	4	1	3
2022-01-22	beikong	80	85	-5	lose	24	53	29	0.453	7	20	13	0.35	11	19	8	0.579	5	10	5	0.5	26	63	37	0.413	9	39	0.848	0.243	19	8	20	6	22	20	6	14	6	12	3	5	1	6	1	2	4	8	4	6
2019-01-23	ningbo	89	108	-19	lose	29	51	22	0.569	5	25	20	0.2	16	25	9	0.64	6	16	10	0.375	21	53	32	0.396	8	23	0.821	0.195	14	9	14	3	17	31	8	10	6	19	4	7	7	15	0	3	6	13	3	9
2019-01-23	nanjing	79	94	-15	lose	19	35	16	0.543	9	25	16	0.36	14	20	6	0.7	6	9	3	0.667	20	49	29	0.408	9	20	0.625	0.29	19	7	18	0	17	20	3	4	8	17	4	6	4	13	0	0	0	0	2	14
2019-01-23	guangzhou	108	89	19	win	32	49	17	0.653	9	21	12	0.429	17	20	3	0.85	4	14	10	0.286	36	55	19	0.655	5	33	0.805	0.179	25	9	15	1	31	17	6	11	7	17	0	1	9	15	2	2	3	5	5	8
2019-01-23	fujian	128	111	17	win	36	54	18	0.667	15	35	20	0.429	11	23	12	0.478	10	23	13	0.435	34	59	25	0.576	14	30	0.667	0.326	24	4	14	6	17	22	5	9	12	25	7	9	15	22	0	2	5	7	2	7
2019-01-23	beikong	111	128	-17	lose	33	62	29	0.532	9	31	22	0.29	18	21	3	0.857	10	24	14	0.417	31	68	37	0.456	15	29	0.674	0.333	17	4	8	4	22	17	5	9	3	12	1	4	14	29	2	4	3	4	7	13
2019-01-23	beijing	94	79	15	win	31	48	17	0.646	8	29	21	0.276	8	10	2	0.8	3	12	9	0.25	32	61	29	0.525	12	22	0.71	0.375	25	12	11	4	20	17	8	9	8	26	3	5	5	8	0	1	1	4	1	4
2021-01-23	xinjiang	108	98	10	win	39	61	22	0.639	6	22	16	0.273	12	21	9	0.571	8	26	18	0.308	32	52	20	0.615	16	32	0.667	0.39	29	6	18	2	27	25	7	10	3	14	2	7	7	16	3	5	6	11	1	1
2021-01-23	shanghai	98	108	-10	lose	30	61	31	0.492	7	26	19	0.269	17	25	8	0.68	7	23	16	0.304	24	58	34	0.414	16	25	0.61	0.333	18	8	19	3	25	27	6	9	4	17	6	14	8	22	1	3	3	6	2	7
2021-01-23	shandong	96	102	-6	lose	20	46	26	0.435	10	28	18	0.357	26	35	9	0.743	9	18	9	0.5	20	55	35	0.364	12	34	0.773	0.267	17	10	17	2	33	33	7	14	4	8	0	2	6	16	4	8	1	3	0	4
2021-01-23	beijing	102	96	6	win	26	45	19	0.578	9	30	21	0.3	23	37	14	0.622	8	22	14	0.364	24	50	26	0.48	10	33	0.733	0.227	23	6	13	3	33	33	8	10	4	11	0	1	1	6	3	8	1	3	0	0
2022-01-23	tianjin	115	86	29	win	25	52	27	0.481	19	38	19	0.5	8	13	5	0.615	14	23	9	0.609	26	63	37	0.413	12	32	0.696	0.3	22	9	11	2	26	17	6	11	9	22	3	6	6	10	4	7	0	1	0	2
2022-01-23	sichuan	86	115	-29	lose	22	55	33	0.4	8	27	19	0.296	18	27	9	0.667	5	11	6	0.455	22	68	46	0.324	14	28	0.7	0.304	19	4	14	2	17	26	1	6	5	13	3	4	5	11	2	8	5	12	0	4
2022-01-23	shanxi	87	104	-17	lose	18	43	25	0.419	14	29	15	0.483	9	15	6	0.6	3	7	4	0.429	27	63	36	0.429	7	31	0.689	0.171	18	3	19	4	11	19	7	12	7	14	5	11	7	12	1	6	2	5	3	6
2022-01-23	qingdao	91	98	-7	lose	27	56	29	0.482	9	27	18	0.333	10	14	4	0.714	3	6	3	0.5	32	76	44	0.421	15	26	0.743	0.326	20	13	15	3	31	19	11	17	6	15	2	5	3	9	0	5	0	1	3	7
2022-01-23	nanjing	95	117	-22	lose	28	48	20	0.583	6	28	22	0.214	21	25	4	0.84	1	3	2	0.333	30	70	40	0.429	10	21	0.656	0.25	15	8	14	1	30	24	7	10	3	12	1	6	7	12	1	4	2	3	2	3
2022-01-23	jilin	104	87	17	win	30	56	26	0.536	12	34	22	0.353	8	10	2	0.8	3	7	4	0.429	35	79	44	0.443	14	34	0.829	0.311	31	9	10	2	19	11	7	15	6	18	3	10	6	10	4	7	2	2	1	4
2022-01-23	guangsha	117	95	22	win	25	43	18	0.581	13	29	16	0.448	28	35	7	0.8	3	6	3	0.5	34	65	31	0.523	11	30	0.75	0.344	26	7	13	7	24	30	3	8	11	17	2	5	4	5	2	4	7	13	0	2
2022-01-23	guangdong	98	91	7	win	14	34	20	0.412	13	35	22	0.371	31	37	6	0.838	3	6	3	0.5	22	61	39	0.361	9	31	0.674	0.257	23	8	19	3	19	31	2	6	6	17	0	5	2	8	3	6	3	5	0	1
2022-01-23	fujian	86	106	-20	lose	29	51	22	0.569	4	23	19	0.174	16	18	2	0.889	2	4	2	0.5	30	69	39	0.435	9	24	0.649	0.243	20	6	14	4	19	21	4	5	3	18	2	6	2	7	0	0	0	0	1	4
2022-01-23	beijing	106	86	20	win	31	51	20	0.608	11	26	15	0.423	11	16	5	0.688	6	11	5	0.545	32	62	30	0.516	13	28	0.757	0.351	29	8	15	5	21	19	9	13	11	21	4	6	4	6	4	8	1	2	0	2
2019-01-24	zhejiang	116	118	-2	lose	25	49	24	0.51	15	31	16	0.484	21	30	9	0.7	13	29	16	0.448	25	49	24	0.51	11	28	0.7	0.282	22	11	22	7	23	24	11	15	7	21	4	6	6	16	1	1	1	2	2	3
2019-01-24	xinjiang	118	116	2	win	33	62	29	0.532	10	20	10	0.5	22	28	6	0.786	12	22	10	0.545	31	60	29	0.517	12	28	0.718	0.3	24	17	16	6	24	23	14	22	4	11	2	6	7	20	3	3	2	5	1	1
2019-01-24	tianjin	109	124	-15	lose	25	50	25	0.5	13	34	21	0.382	20	25	5	0.8	14	35	21	0.4	21	46	25	0.457	13	33	0.733	0.271	19	5	15	3	23	25	7	11	7	21	7	12	10	25	2	4	2	3	2	9
2019-01-24	sichuan	94	104	-10	lose	30	53	23	0.566	7	30	23	0.233	13	18	5	0.722	5	13	8	0.385	29	67	38	0.433	15	28	0.683	0.341	22	12	15	3	26	22	9	14	10	27	2	9	5	14	1	2	3	3	0	0
2019-01-24	shenzhen	121	114	7	win	25	45	20	0.556	19	39	20	0.487	14	18	4	0.778	6	11	5	0.545	36	71	35	0.507	13	26	0.542	0.325	23	10	16	2	20	19	4	10	10	22	2	5	15	23	4	6	1	3	3	5
2019-01-24	shanxi	114	121	-7	lose	38	63	25	0.603	8	33	25	0.242	14	18	4	0.778	2	15	13	0.133	40	77	37	0.519	22	27	0.675	0.458	16	11	15	4	19	20	6	8	6	24	9	14	18	31	3	5	0	3	4	8
2019-01-24	shanghai	104	94	10	win	31	58	27	0.534	7	19	12	0.368	21	24	3	0.875	8	11	3	0.727	26	62	36	0.419	13	29	0.659	0.317	23	9	17	1	22	26	5	5	5	11	3	5	8	14	2	4	6	16	0	1
2019-01-24	qingdao	108	129	-21	lose	27	60	33	0.45	8	27	19	0.296	30	38	8	0.789	6	20	14	0.3	27	65	38	0.415	12	29	0.604	0.25	21	11	12	4	25	31	15	29	4	11	2	6	6	17	2	3	0	2	2	12
2019-01-24	guangsha	124	109	15	win	25	42	17	0.595	17	43	26	0.395	23	29	6	0.793	18	47	29	0.383	21	35	14	0.6	12	35	0.729	0.267	28	10	10	4	25	23	8	16	12	31	5	7	11	17	2	3	2	3	2	5
2019-01-24	guangdong	129	108	21	win	42	76	34	0.553	8	20	12	0.4	21	30	9	0.7	8	18	10	0.444	39	75	36	0.52	19	36	0.75	0.396	32	8	14	4	31	25	18	27	4	12	5	10	7	19	3	7	3	7	1	1
2021-01-24	tianjin	109	133	-24	lose	32	47	15	0.681	9	27	18	0.333	18	21	3	0.857	4	8	4	0.5	32	61	29	0.525	6	13	0.464	0.188	21	11	18	3	28	24	7	11	7	13	5	7	9	12	5	9	5	6	1	3
2021-01-24	shenzhen	111	100	11	win	29	44	15	0.659	11	35	24	0.314	20	34	14	0.588	9	29	20	0.31	30	49	19	0.612	15	39	0.907	0.395	17	7	22	5	27	28	2	7	7	16	5	8	10	16	1	4	4	6	2	4
2021-01-24	nanjing	125	122	3	win	33	57	24	0.579	13	34	21	0.382	20	23	3	0.87	2	10	8	0.2	41	78	37	0.526	16	23	0.59	0.381	31	5	9	2	27	21	5	7	11	22	5	8	8	12	4	6	1	4	1	5
2021-01-24	jilin	122	125	-3	lose	40	61	21	0.656	4	22	18	0.182	30	36	6	0.833	3	9	6	0.333	33	66	33	0.5	16	26	0.619	0.41	22	5	11	3	21	27	6	6	6	18	5	9	11	17	1	3	0	2	9	16
2021-01-24	jiangsu	100	111	-11	lose	28	58	30	0.483	8	21	13	0.381	20	29	9	0.69	8	23	15	0.348	25	53	28	0.472	4	23	0.605	0.093	12	12	13	1	28	27	9	13	4	10	6	10	14	26	0	2	1	4	1	3
2021-01-24	guangsha	133	109	24	win	40	60	20	0.667	9	17	8	0.529	26	32	6	0.813	1	4	3	0.25	42	67	25	0.627	15	26	0.813	0.536	26	12	20	0	24	28	8	17	9	15	3	6	7	11	1	2	5	8	1	2
2021-01-24	guangdong	137	122	15	win	45	63	18	0.714	4	24	20	0.167	35	41	6	0.854	1	9	8	0.111	40	70	30	0.571	9	32	0.762	0.243	26	13	17	3	28	34	16	26	1	11	3	5	12	16	1	2	6	8	2	4
2021-01-24	fujian	122	137	-15	lose	30	49	19	0.612	15	39	24	0.385	17	24	7	0.708	11	30	19	0.367	29	53	24	0.547	10	28	0.757	0.238	30	9	24	3	34	28	13	17	12	28	2	6	5	10	0	3	6	8	1	4
2022-01-24	zhejiang	90	78	12	win	22	49	27	0.449	11	29	18	0.379	13	14	1	0.929	2	4	2	0.5	29	72	43	0.403	11	32	0.667	0.289	24	12	15	5	26	20	4	6	6	10	0	3	3	10	4	9	0	2	0	2
2022-01-24	shenzhen	78	90	-12	lose	22	55	33	0.4	4	22	18	0.182	22	25	3	0.88	2	8	6	0.25	21	66	45	0.318	16	27	0.711	0.333	20	10	16	5	20	26	5	10	3	13	4	14	4	7	2	2	1	6	2	5
2022-01-24	ningbo	102	118	-16	lose	23	40	17	0.575	12	25	13	0.48	20	30	10	0.667	9	13	4	0.692	24	50	26	0.48	4	32	0.711	0.148	23	7	20	2	24	23	5	9	10	22	1	7	1	2	0	2	7	8	1	1
2022-01-24	liaoning	118	102	16	win	32	44	12	0.727	13	40	27	0.325	15	26	11	0.577	7	11	4	0.636	33	68	35	0.485	13	23	0.852	0.289	31	10	9	1	23	24	10	13	9	26	1	7	7	7	2	4	3	5	1	1
2019-01-25	shandong	120	111	9	win	36	59	23	0.61	12	25	13	0.48	12	14	2	0.857	16	32	16	0.5	32	52	20	0.615	9	30	0.714	0.273	24	10	11	4	25	21	12	21	6	14	3	7	13	20	5	7	4	7	3	4
2019-01-25	ningbo	71	85	-14	lose	18	50	32	0.36	7	25	18	0.28	14	21	7	0.667	2	7	5	0.286	20	65	45	0.308	16	26	0.839	0.364	10	8	15	0	21	23	4	8	7	22	1	10	8	24	1	3	2	8	1	2
2019-01-25	nanjing	100	112	-12	lose	28	47	19	0.596	9	30	21	0.3	17	19	2	0.895	4	13	9	0.308	33	64	31	0.516	10	19	0.613	0.25	15	11	14	3	20	18	3	8	6	22	6	11	12	21	0	0	0	1	9	16
2019-01-25	liaoning	101	91	10	win	32	55	23	0.582	6	25	19	0.24	19	26	7	0.731	3	6	3	0.5	31	70	39	0.443	11	41	0.788	0.262	18	10	14	7	24	25	10	13	5	16	3	3	6	11	3	4	2	2	0	6
2019-01-25	jilin	112	100	12	win	38	62	24	0.613	7	15	8	0.467	15	21	6	0.714	5	7	2	0.714	37	67	30	0.552	12	30	0.75	0.387	19	8	18	1	18	20	6	7	12	17	4	7	13	18	3	5	5	9	5	15
2019-01-25	jiangsu	113	103	10	win	33	45	12	0.733	10	24	14	0.417	17	24	7	0.708	14	28	14	0.5	25	37	12	0.676	3	28	0.757	0.1	19	6	14	4	22	22	11	14	6	15	6	7	11	14	3	4	4	6	2	3
2019-01-25	guangzhou	91	101	-10	lose	19	53	34	0.358	12	35	23	0.343	17	23	6	0.739	2	5	3	0.4	25	79	54	0.316	11	31	0.738	0.212	12	8	14	2	25	24	5	12	4	17	2	8	7	20	0	3	2	4	4	9
2019-01-25	fujian	111	120	-9	lose	27	52	25	0.519	13	29	16	0.448	18	25	7	0.72	17	32	15	0.531	20	46	26	0.435	12	24	0.727	0.286	26	7	13	4	21	25	8	12	7	12	1	3	5	14	2	6	8	17	0	5
2019-01-25	beikong	103	113	-10	lose	21	38	17	0.553	13	39	26	0.333	22	26	4	0.846	16	40	24	0.4	16	35	19	0.457	9	27	0.9	0.243	16	8	16	0	22	22	5	10	8	20	1	7	6	11	3	6	1	3	3	5
2019-01-25	beijing	85	71	14	win	24	42	18	0.571	8	18	10	0.444	13	20	7	0.65	4	5	1	0.8	25	52	27	0.481	5	28	0.636	0.161	23	6	18	3	23	21	4	7	8	19	4	5	11	19	1	2	3	7	4	6
2021-01-25	xinjiang	93	100	-7	lose	27	52	25	0.519	10	28	18	0.357	9	22	13	0.409	5	13	8	0.385	32	67	35	0.478	13	33	0.688	0.302	16	3	14	2	29	20	4	10	6	19	5	10	15	25	2	4	1	6	3	6
2021-01-25	shanxi	114	125	-11	lose	22	50	28	0.44	12	25	13	0.48	34	39	5	0.872	4	11	7	0.364	29	63	34	0.46	9	28	0.8	0.243	16	6	15	0	29	25	6	11	2	5	3	4	9	19	1	1	1	3	2	8
2021-01-25	beikong	100	93	7	win	24	52	28	0.462	9	32	23	0.281	25	33	8	0.758	8	22	14	0.364	21	58	37	0.362	15	30	0.698	0.313	19	8	8	5	20	29	5	10	9	24	1	7	9	21	1	4	1	2	2	5
2021-01-25	beijing	125	114	11	win	28	47	19	0.596	12	29	17	0.414	33	40	7	0.825	5	11	6	0.455	31	61	30	0.508	7	28	0.757	0.2	21	8	14	4	25	29	7	11	6	15	2	6	8	9	2	6	2	5	2	4
2022-01-25	xinjiang	120	84	36	win	36	63	27	0.571	9	24	15	0.375	21	24	3	0.875	4	6	2	0.667	37	77	40	0.481	13	40	0.727	0.361	31	8	10	5	16	19	15	22	3	12	2	3	7	10	2	7	5	11	0	1
2022-01-25	tianjin	96	112	-16	lose	16	38	22	0.421	11	32	21	0.344	31	33	2	0.939	0	1	1	0	24	66	42	0.364	3	24	0.686	0.083	23	7	13	5	22	28	7	9	6	16	3	9	4	10	1	3	0	2	1	4
2022-01-25	shanxi	105	111	-6	lose	17	50	33	0.34	16	38	22	0.421	23	24	1	0.958	3	7	4	0.429	29	80	51	0.363	14	26	0.743	0.28	21	11	9	2	24	21	4	8	6	21	3	6	4	13	2	3	0	5	2	5
2022-01-25	shanghai	110	107	3	win	29	44	15	0.659	13	29	16	0.448	13	18	5	0.722	9	19	10	0.474	29	50	21	0.58	5	30	0.714	0.167	27	7	22	11	23	22	6	10	8	22	4	7	5	7	3	5	5	6	1	4
2022-01-25	shandong	97	94	3	win	29	56	27	0.518	10	25	15	0.4	9	13	4	0.692	1	5	4	0.2	37	75	38	0.493	14	21	0.568	0.35	25	12	13	1	26	20	6	10	5	14	4	8	6	11	1	5	3	7	4	9
2022-01-25	qingdao	107	110	-3	lose	34	61	27	0.557	9	27	18	0.333	12	18	6	0.667	5	10	5	0.5	34	74	40	0.459	12	25	0.833	0.286	22	11	14	2	22	23	9	15	4	16	0	4	9	15	4	5	6	8	6	8
2022-01-25	nanjing	84	120	-36	lose	21	46	25	0.457	10	38	28	0.263	12	17	5	0.706	1	3	2	0.333	27	78	51	0.346	15	23	0.639	0.273	19	6	16	2	19	16	9	15	6	20	3	6	4	9	0	1	2	5	0	4
2022-01-25	guangzhou	111	105	6	win	31	49	18	0.633	11	28	17	0.393	16	23	7	0.696	4	8	4	0.5	35	66	31	0.53	9	36	0.72	0.257	29	7	14	2	21	24	7	10	7	15	10	14	12	17	2	6	0	1	1	4
2022-01-25	guangsha	94	97	-3	lose	24	49	25	0.49	8	24	16	0.333	22	25	3	0.88	3	6	3	0.5	24	62	38	0.387	16	26	0.65	0.432	21	8	20	3	20	26	2	4	5	15	1	5	6	14	3	7	7	14	1	3
2022-01-25	beijing	112	96	16	win	30	52	22	0.577	11	26	15	0.423	19	21	2	0.905	1	4	3	0.25	37	71	34	0.521	11	33	0.917	0.314	29	6	14	7	28	22	8	8	7	20	6	10	11	15	0	0	2	4	2	2
2019-01-26	xinjiang	103	97	6	win	25	56	31	0.446	10	24	14	0.417	23	28	5	0.821	8	17	9	0.471	26	62	36	0.419	18	33	0.846	0.409	20	6	18	4	21	22	4	9	6	15	1	4	4	12	1	2	5	11	0	3
2019-01-26	sichuan	115	119	-4	lose	30	52	22	0.577	11	33	22	0.333	22	26	4	0.846	4	6	2	0.667	33	75	42	0.44	9	29	0.784	0.22	17	9	11	6	29	24	9	13	8	24	1	4	2	9	0	0	1	4	0	5
2019-01-26	shanxi	126	140	-14	lose	38	55	17	0.691	10	26	16	0.385	20	24	4	0.833	1	3	2	0.333	45	76	31	0.592	12	28	0.737	0.364	16	6	24	4	27	25	9	12	6	15	5	6	16	22	0	0	1	1	2	4
2019-01-26	shanghai	97	103	-6	lose	27	55	28	0.491	11	24	13	0.458	10	14	4	0.714	7	15	8	0.467	30	63	33	0.476	6	26	0.591	0.154	21	8	15	3	22	21	10	20	3	8	2	4	9	18	3	6	3	3	4	8
2019-01-26	guangsha	119	115	4	win	31	51	20	0.608	12	34	22	0.353	21	25	4	0.84	6	9	3	0.667	31	70	39	0.443	8	32	0.78	0.216	17	6	13	3	24	29	7	11	8	19	2	4	9	16	0	4	3	5	3	8
2019-01-26	guangdong	140	126	14	win	41	66	25	0.621	11	24	13	0.458	25	33	8	0.758	0	4	4	0	47	81	34	0.58	10	21	0.636	0.263	32	15	11	1	25	27	18	26	8	16	4	5	6	13	0	0	0	4	0	3
2021-01-26	zhejiang	120	119	1	win	26	50	24	0.52	13	32	19	0.406	29	34	5	0.853	5	11	6	0.455	30	67	37	0.448	7	25	0.806	0.189	15	7	14	2	28	32	8	16	3	9	1	4	9	20	1	3	0	0	8	12
2021-01-26	shandong	119	120	-1	lose	31	53	22	0.585	10	22	12	0.455	27	34	7	0.794	3	10	7	0.3	33	60	27	0.55	6	30	0.811	0.194	19	10	18	4	32	28	9	18	5	10	2	7	12	20	4	6	3	5	7	9
2021-01-26	qingdao	116	111	5	win	32	56	24	0.571	7	24	17	0.292	31	41	10	0.756	8	21	13	0.381	28	56	28	0.5	21	29	0.853	0.525	23	3	13	1	24	28	10	15	2	13	2	6	3	9	1	4	6	9	0	1
2021-01-26	guangzhou	111	116	-5	lose	28	52	24	0.538	11	22	11	0.5	22	25	3	0.88	14	28	14	0.5	25	46	21	0.543	5	19	0.475	0.147	18	10	9	4	28	24	6	9	5	13	4	7	7	11	1	1	6	12	3	3
2022-01-26	sichuan	76	110	-34	lose	17	43	26	0.395	11	34	23	0.324	9	11	2	0.818	5	6	1	0.833	22	70	48	0.314	4	33	0.846	0.087	25	6	14	2	23	14	2	5	5	17	2	6	3	6	5	7	3	7	0	4
2022-01-26	jilin	88	87	1	win	30	58	28	0.517	6	27	21	0.222	10	15	5	0.667	3	6	3	0.5	30	76	46	0.395	12	23	0.622	0.25	31	12	9	6	23	18	8	18	5	19	1	4	4	13	7	9	1	2	2	9
2022-01-26	jiangsu	101	109	-8	lose	27	51	24	0.529	9	29	20	0.31	20	29	9	0.69	1	5	4	0.2	31	71	40	0.437	10	31	0.705	0.25	19	4	11	2	29	26	4	11	6	15	3	4	5	15	2	10	4	4	1	4
2022-01-26	guangdong	110	76	34	win	28	43	15	0.651	11	32	21	0.344	21	29	8	0.724	1	6	5	0.167	35	66	31	0.53	6	42	0.913	0.154	25	8	11	3	14	23	8	8	7	17	2	5	11	15	1	2	0	2	2	4
2022-01-26	fujian	109	101	8	win	22	50	28	0.44	13	31	18	0.419	26	30	4	0.867	2	5	3	0.4	29	72	43	0.403	13	30	0.75	0.295	22	7	11	5	26	29	5	11	8	14	7	12	8	12	1	3	0	0	2	10
2022-01-26	beikong	87	88	-1	lose	23	48	25	0.479	7	22	15	0.318	20	25	5	0.8	9	16	7	0.563	20	53	33	0.377	14	36	0.75	0.378	17	5	21	8	18	23	3	6	6	15	5	8	5	11	0	2	3	4	1	4
2019-01-27	zhejiang	129	114	15	win	27	47	20	0.574	19	42	23	0.452	18	23	5	0.783	18	42	24	0.429	25	44	19	0.568	12	34	0.944	0.3	25	9	13	3	21	17	14	21	6	18	3	6	10	21	2	6	0	2	4	5
2019-01-27	tianjin	114	129	-15	lose	23	34	11	0.676	17	42	25	0.405	17	22	5	0.773	17	38	21	0.447	21	36	15	0.583	2	28	0.7	0.056	20	9	11	4	17	21	10	17	8	20	5	8	9	15	3	4	0	0	3	5
2019-01-27	shenzhen	120	125	-5	lose	33	53	20	0.623	12	32	20	0.375	18	28	10	0.643	2	10	8	0.2	41	73	32	0.562	12	24	0.585	0.3	25	8	10	3	21	22	8	13	5	11	4	8	8	15	0	2	1	4	6	11
2019-01-27	shandong	111	91	20	win	36	58	22	0.621	3	14	11	0.214	30	46	16	0.652	2	8	6	0.25	33	60	27	0.55	10	33	0.688	0.294	24	14	13	2	28	37	8	13	2	7	5	7	7	10	1	6	7	12	0	1
2019-01-27	qingdao	117	102	15	win	31	46	15	0.674	13	32	19	0.406	16	22	6	0.727	5	9	4	0.556	36	66	30	0.545	3	40	0.8	0.094	23	12	13	3	19	22	11	14	11	23	9	19	19	32	0	1	2	3	2	5
2019-01-27	ningbo	98	87	11	win	32	62	30	0.516	5	20	15	0.25	19	24	5	0.792	8	25	17	0.32	27	55	28	0.491	10	36	0.837	0.278	19	5	13	5	19	22	9	16	5	18	4	7	11	19	3	7	1	8	2	3
2019-01-27	nanjing	87	98	-11	lose	29	59	30	0.492	4	17	13	0.235	17	24	7	0.708	6	17	11	0.353	25	57	32	0.439	7	26	0.722	0.163	13	5	10	5	22	19	7	10	2	9	1	4	8	26	2	3	3	3	5	17
2019-01-27	liaoning	116	110	6	win	38	66	28	0.576	10	30	20	0.333	10	12	2	0.833	14	33	19	0.424	32	61	29	0.525	16	32	0.762	0.364	24	10	11	1	19	18	9	14	6	20	1	3	6	14	3	5	8	14	0	2
2019-01-27	jilin	125	120	5	win	40	68	28	0.588	9	24	15	0.375	18	21	3	0.857	5	18	13	0.278	41	71	30	0.577	17	28	0.7	0.415	21	6	12	3	22	21	11	15	7	17	3	9	6	15	1	8	3	4	2	9
2019-01-27	jiangsu	109	107	2	win	35	55	20	0.636	5	17	12	0.294	24	30	6	0.8	7	19	12	0.368	29	49	20	0.592	5	30	0.857	0.167	16	6	17	3	34	26	7	12	3	11	7	14	12	22	3	5	4	6	1	1
2019-01-27	guangzhou	91	111	-20	lose	22	51	29	0.431	8	29	21	0.276	23	27	4	0.852	2	15	13	0.133	25	62	37	0.403	15	24	0.706	0.313	16	9	17	3	37	28	6	8	5	17	1	9	9	20	1	4	2	2	3	5
2019-01-27	fujian	110	116	-6	lose	28	57	29	0.491	14	33	19	0.424	12	15	3	0.8	19	39	20	0.487	19	47	28	0.404	10	28	0.636	0.238	20	8	13	4	18	19	4	10	8	13	4	11	6	16	2	4	4	9	1	3
2019-01-27	beikong	102	117	-15	lose	27	46	19	0.587	11	43	32	0.256	15	22	7	0.682	4	13	9	0.308	32	74	42	0.432	10	29	0.906	0.2	17	6	12	0	22	19	4	13	7	25	1	4	13	25	5	9	1	2	2	5
2019-01-27	beijing	107	109	-2	lose	21	39	18	0.538	9	29	20	0.31	38	47	9	0.809	10	30	20	0.333	17	35	18	0.486	5	25	0.833	0.143	13	12	12	3	27	34	7	13	6	16	4	8	11	17	0	3	0	0	2	3
2021-01-27	xinjiang	130	102	28	win	33	47	14	0.702	15	35	20	0.429	19	23	4	0.826	16	38	22	0.421	31	43	12	0.721	13	36	0.947	0.394	37	7	13	0	31	22	11	15	11	30	2	6	7	11	0	1	6	6	2	2
2021-01-27	tianjin	93	103	-10	lose	21	49	28	0.429	12	31	19	0.387	15	18	3	0.833	7	20	13	0.35	24	58	34	0.414	14	24	0.686	0.298	24	9	19	8	29	17	4	9	8	21	4	11	6	13	2	6	0	1	2	5
2021-01-27	sichuan	108	112	-4	lose	24	40	16	0.6	11	25	14	0.44	27	36	9	0.75	9	15	6	0.6	25	49	24	0.51	12	23	0.59	0.375	17	6	18	3	29	30	2	3	8	17	3	3	6	7	2	5	3	6	2	3
2021-01-27	shenzhen	103	117	-14	lose	23	39	16	0.59	14	38	24	0.368	15	18	3	0.833	8	15	7	0.533	25	58	33	0.431	6	26	0.722	0.162	18	4	17	4	14	18	3	8	8	20	0	2	6	7	6	8	2	4	1	5
2021-01-27	shanghai	120	146	-26	lose	33	52	19	0.635	11	33	22	0.333	21	27	6	0.778	8	19	11	0.421	35	65	30	0.538	13	27	0.692	0.333	19	12	27	4	24	23	14	23	4	13	9	18	12	22	2	3	1	3	1	1
2021-01-27	nanjing	100	127	-27	lose	25	44	19	0.568	11	32	21	0.344	17	22	5	0.773	11	20	9	0.55	24	55	31	0.436	8	32	0.711	0.2	23	4	20	3	23	22	8	13	9	22	2	6	4	10	0	4	2	5	2	3
2021-01-27	liaoning	117	103	14	win	31	54	23	0.574	15	33	18	0.455	10	12	2	0.833	9	23	14	0.391	33	60	27	0.55	10	31	0.838	0.278	27	9	12	1	18	14	9	12	10	25	3	7	6	7	3	4	2	4	4	7
2021-01-27	jilin	103	93	10	win	35	58	23	0.603	2	17	15	0.118	27	36	9	0.75	1	3	2	0.333	32	68	36	0.471	11	33	0.702	0.314	17	8	14	6	17	29	6	9	1	8	4	7	10	21	1	4	2	3	4	11
2021-01-27	guangsha	112	108	4	win	31	61	30	0.508	6	14	8	0.429	32	36	4	0.889	9	17	8	0.529	26	56	30	0.464	16	20	0.625	0.41	25	7	11	5	30	29	3	4	9	21	2	7	3	13	3	3	3	7	2	3
2021-01-27	guangdong	146	120	26	win	37	57	20	0.649	17	39	22	0.436	21	30	9	0.7	7	15	8	0.467	41	75	34	0.547	12	26	0.667	0.308	25	21	14	2	23	24	17	25	5	12	4	6	9	13	0	2	1	2	0	2
2021-01-27	fujian	102	130	-28	lose	24	39	15	0.615	9	32	23	0.281	27	34	7	0.794	12	34	22	0.353	16	32	16	0.5	2	20	0.606	0.053	17	8	11	0	22	31	7	10	7	24	3	6	6	8	0	2	4	6	2	7
2021-01-27	beikong	127	100	27	win	29	56	27	0.518	16	35	19	0.457	21	29	8	0.724	7	20	13	0.35	33	66	33	0.5	13	32	0.8	0.289	27	12	8	5	22	23	6	17	7	15	2	8	5	16	0	2	3	3	4	7
2022-01-27	zhejiang	93	88	5	win	23	43	20	0.535	11	40	29	0.275	14	19	5	0.737	7	15	8	0.467	24	65	41	0.369	12	29	0.763	0.261	18	11	11	2	24	21	6	8	3	15	1	4	3	5	0	6	1	1	1	3
2022-01-27	shenzhen	104	97	7	win	28	50	22	0.56	10	28	18	0.357	18	25	7	0.72	4	10	6	0.4	29	63	34	0.46	5	31	0.775	0.132	24	12	5	2	18	24	13	17	4	15	3	6	5	9	0	0	0	0	3	4
2022-01-27	qingdao	88	93	-5	lose	23	46	23	0.5	8	24	16	0.333	18	30	12	0.6	4	10	6	0.4	27	60	33	0.45	9	34	0.739	0.237	17	7	14	2	21	24	8	15	6	10	6	13	5	9	0	4	1	4	0	0
2022-01-27	ningbo	105	125	-20	lose	32	50	18	0.64	8	21	13	0.381	17	27	10	0.63	4	6	2	0.667	32	61	29	0.525	8	24	0.585	0.267	21	5	21	6	35	32	5	9	5	14	8	12	11	12	1	3	5	6	3	6
2022-01-27	nanjing	109	129	-20	lose	33	49	16	0.673	9	23	14	0.391	16	20	4	0.8	1	3	2	0.333	37	65	28	0.569	5	28	0.737	0.172	27	6	22	2	28	16	12	15	7	15	2	7	5	7	3	4	3	4	1	2
2022-01-27	liaoning	129	109	20	win	31	47	16	0.66	15	36	21	0.417	22	33	11	0.667	4	4	0	1	36	73	37	0.493	10	24	0.828	0.263	37	18	13	1	16	28	8	12	9	17	0	6	5	10	7	12	4	7	3	6
2022-01-27	guangzhou	125	105	20	win	28	56	28	0.5	11	22	11	0.5	36	44	8	0.818	1	3	2	0.333	33	70	37	0.471	17	22	0.733	0.415	27	11	16	3	32	35	5	10	8	16	5	8	7	11	2	3	6	10	2	3
2022-01-27	beijing	97	104	-7	lose	25	44	19	0.568	12	29	17	0.414	11	18	7	0.611	4	12	8	0.333	29	57	28	0.509	9	33	0.868	0.225	22	2	16	4	24	18	4	5	5	18	0	2	5	8	3	3	1	2	1	3
2021-01-28	zhejiang	103	110	-7	lose	17	40	23	0.425	13	42	29	0.31	30	36	6	0.833	15	46	31	0.326	12	33	21	0.364	14	20	0.606	0.286	11	8	10	2	21	29	2	7	7	19	2	5	8	13	0	3	0	0	2	4
2021-01-28	shanxi	84	113	-29	lose	23	62	39	0.371	7	24	17	0.292	17	24	7	0.708	7	26	19	0.269	23	60	37	0.383	15	33	0.75	0.288	14	11	18	2	23	22	9	18	1	6	3	7	2	17	1	9	0	2	0	2
2021-01-28	shandong	113	84	29	win	31	57	26	0.544	12	30	18	0.4	15	21	6	0.714	10	27	17	0.37	30	57	27	0.526	11	37	0.712	0.25	21	13	16	9	22	23	17	24	2	7	1	6	9	20	2	4	4	7	4	6
2021-01-28	qingdao	110	103	7	win	33	50	17	0.66	10	30	20	0.333	14	19	5	0.737	11	34	23	0.324	29	43	14	0.674	13	35	0.714	0.394	24	6	16	2	29	21	9	13	8	23	3	6	5	10	0	1	5	8	2	3
2021-01-28	guangzhou	102	114	-12	lose	27	47	20	0.574	9	31	22	0.29	21	27	6	0.778	9	26	17	0.346	24	49	25	0.49	11	27	0.628	0.275	14	5	14	3	34	21	3	7	3	10	4	8	8	15	0	1	7	12	2	4
2021-01-28	beijing	114	102	12	win	15	43	28	0.349	16	33	17	0.485	36	46	10	0.783	17	39	22	0.436	13	36	23	0.361	16	29	0.725	0.372	22	6	10	2	21	34	4	7	9	20	1	4	3	12	5	6	1	2	0	1
2022-01-28	xinjiang	96	117	-21	lose	30	63	33	0.476	6	17	11	0.353	18	25	7	0.72	3	5	2	0.6	28	70	42	0.4	17	24	0.667	0.386	23	3	19	1	21	20	5	11	2	9	4	8	6	8	2	4	2	6	0	4
2022-01-28	tianjin	105	85	20	win	24	47	23	0.511	14	38	24	0.368	15	19	4	0.789	5	10	5	0.5	30	72	42	0.417	14	31	0.838	0.326	22	9	15	5	18	19	7	14	9	19	1	8	5	9	1	2	1	2	4	6
2022-01-28	sichuan	100	84	16	win	29	52	23	0.558	4	9	5	0.444	30	37	7	0.811	2	10	8	0.2	24	44	20	0.545	13	34	0.81	0.448	28	5	22	6	24	35	1	3	4	6	4	8	9	15	1	2	5	8	1	3
2022-01-28	shanxi	112	116	-4	lose	22	45	23	0.489	14	32	18	0.438	26	30	4	0.867	2	5	3	0.4	32	70	38	0.457	7	23	0.535	0.2	29	10	9	2	27	28	4	11	10	18	3	4	3	7	3	5	0	1	1	3
2022-01-28	shanghai	108	101	7	win	26	51	25	0.51	15	32	17	0.469	11	11	0	1	4	13	9	0.308	37	70	33	0.529	10	34	0.739	0.286	28	9	14	7	24	13	5	15	6	18	5	7	4	7	2	5	2	5	1	2
2022-01-28	shandong	116	112	4	win	28	53	25	0.528	13	31	18	0.419	21	32	11	0.656	4	4	0	1	33	76	43	0.434	20	28	0.8	0.465	19	4	16	2	28	27	5	7	6	13	4	5	12	18	3	11	1	5	2	4
2022-01-28	jilin	117	96	21	win	34	57	23	0.596	11	27	16	0.407	16	24	8	0.667	2	2	0	1	37	76	39	0.487	12	27	0.614	0.333	32	8	12	1	20	21	12	13	9	20	5	7	9	16	2	4	3	3	2	10
2022-01-28	jiangsu	84	100	-16	lose	18	45	27	0.4	11	31	20	0.355	15	19	4	0.789	5	14	9	0.357	24	62	38	0.387	8	16	0.552	0.19	20	12	12	0	35	24	3	9	3	9	6	11	9	19	2	5	1	2	1	4
2022-01-28	guangsha	110	83	27	win	24	42	18	0.571	12	27	15	0.444	26	32	6	0.813	3	3	0	1	31	64	33	0.484	11	33	0.66	0.314	24	12	15	5	28	29	1	3	5	14	2	3	4	8	1	3	4	5	0	2
2022-01-28	guangdong	101	108	-7	lose	30	59	29	0.508	9	26	17	0.346	14	21	7	0.667	5	11	6	0.455	31	71	40	0.437	12	25	0.714	0.261	22	7	13	4	13	24	5	11	6	13	3	5	11	19	2	8	3	10	2	3
2022-01-28	fujian	85	105	-20	lose	29	51	22	0.569	6	23	17	0.261	9	12	3	0.75	1	3	2	0.333	32	69	37	0.464	6	29	0.674	0.162	26	5	16	3	19	18	8	13	3	10	3	9	6	17	7	9	1	3	0	1
2022-01-28	beikong	83	110	-27	lose	22	56	34	0.393	8	22	14	0.364	15	22	7	0.682	2	8	6	0.25	24	66	42	0.364	17	24	0.686	0.34	18	5	19	6	29	28	4	9	2	10	1	5	5	14	1	5	3	6	2	4
2019-01-29	xinjiang	127	111	16	win	35	58	23	0.603	10	20	10	0.5	27	35	8	0.771	5	9	4	0.556	36	65	29	0.554	10	30	0.638	0.357	18	8	16	5	30	28	12	19	8	18	5	8	18	26	0	1	2	6	2	4
2019-01-29	tianjin	120	135	-15	lose	25	58	33	0.431	17	42	25	0.405	19	21	2	0.905	14	35	21	0.4	27	64	37	0.422	20	23	0.697	0.377	25	9	8	4	21	23	6	16	10	25	2	9	5	19	0	1	0	0	6	12
2019-01-29	sichuan	113	124	-11	lose	29	53	24	0.547	13	28	15	0.464	16	21	5	0.762	4	11	7	0.364	37	69	32	0.536	10	33	0.717	0.263	21	4	20	2	21	22	5	9	12	22	6	11	4	10	0	1	1	5	2	7
2019-01-29	shenzhen	120	112	8	win	30	54	24	0.556	15	37	22	0.405	15	23	8	0.652	5	9	4	0.556	39	81	42	0.481	15	24	0.686	0.333	29	9	8	1	19	21	6	14	8	20	1	5	7	17	2	3	2	3	0	2
2019-01-29	shanxi	109	138	-29	lose	27	56	29	0.482	10	26	16	0.385	25	30	5	0.833	8	15	7	0.533	23	61	38	0.377	10	26	0.619	0.222	11	3	6	0	18	22	5	11	5	11	3	3	10	17	1	2	6	11	3	10
2019-01-29	shanghai	135	120	15	win	37	53	16	0.698	14	35	21	0.4	19	22	3	0.864	12	33	21	0.364	35	51	16	0.686	10	33	0.623	0.303	24	6	10	5	23	21	14	24	6	16	4	8	16	22	3	6	1	2	1	1
2019-01-29	shandong	94	96	-2	lose	32	55	23	0.582	4	20	16	0.2	18	30	12	0.6	2	8	6	0.25	29	62	33	0.468	10	34	0.739	0.244	22	4	16	6	24	29	7	8	3	14	2	7	7	18	1	4	3	7	4	10
2019-01-29	qingdao	90	102	-12	lose	27	53	26	0.509	5	19	14	0.263	21	25	4	0.84	5	18	13	0.278	22	49	27	0.449	10	21	0.75	0.27	14	9	17	1	16	27	5	10	5	18	3	8	10	23	1	1	2	2	5	9
2019-01-29	ningbo	96	94	2	win	26	64	38	0.406	9	23	14	0.391	17	23	6	0.739	4	12	8	0.333	28	72	44	0.389	12	31	0.756	0.261	26	9	7	0	29	24	9	13	6	17	3	7	7	19	1	5	7	14	0	5
2019-01-29	liaoning	112	120	-8	lose	27	44	17	0.614	15	40	25	0.375	13	14	1	0.929	4	7	3	0.571	34	73	39	0.466	11	30	0.667	0.314	27	6	17	2	21	19	12	16	10	28	2	6	5	12	0	3	2	4	1	1
2019-01-29	guangsha	111	127	-16	lose	31	59	28	0.525	8	35	27	0.229	25	28	3	0.893	3	8	5	0.375	32	82	50	0.39	17	18	0.643	0.362	23	12	10	5	28	30	9	18	12	35	1	6	6	17	0	2	6	8	2	4
2019-01-29	guangdong	124	113	11	win	43	72	29	0.597	7	25	18	0.28	17	23	6	0.739	3	13	10	0.231	44	81	37	0.543	13	28	0.737	0.283	24	11	11	3	22	21	15	20	4	16	2	6	6	11	1	2	1	1	1	7
2019-01-29	fujian	138	109	29	win	35	53	18	0.66	19	43	24	0.442	11	14	3	0.786	10	17	7	0.588	40	75	35	0.533	16	35	0.778	0.381	31	3	8	0	22	18	8	10	11	29	2	5	8	12	2	3	9	17	5	5
2019-01-29	beijing	102	90	12	win	30	46	16	0.652	11	27	16	0.407	9	13	4	0.692	14	31	17	0.452	25	40	15	0.625	7	27	0.73	0.25	24	10	15	3	27	16	8	10	8	20	5	9	13	23	4	7	1	1	4	6
2021-01-29	xinjiang	102	112	-10	lose	34	64	30	0.531	5	20	15	0.25	19	24	5	0.792	3	9	6	0.333	33	72	39	0.458	14	21	0.6	0.4	21	10	17	3	34	30	7	9	6	15	4	11	7	16	1	3	3	8	0	1
2021-01-29	sichuan	119	111	8	win	32	54	22	0.593	10	22	12	0.455	25	30	5	0.833	7	13	6	0.538	32	60	28	0.533	14	32	0.711	0.452	23	4	15	3	16	28	10	12	3	8	0	2	7	10	3	5	6	9	4	5
2021-01-29	shanghai	100	114	-14	lose	28	54	26	0.519	12	30	18	0.4	8	10	2	0.8	10	23	13	0.435	28	59	31	0.475	11	31	0.775	0.282	20	2	19	2	19	17	4	9	6	15	7	11	11	20	3	6	1	1	1	2
2021-01-29	nanjing	109	161	-52	lose	23	47	24	0.489	12	26	14	0.462	27	33	6	0.818	12	22	10	0.545	20	48	28	0.417	11	23	0.605	0.282	22	8	38	2	35	30	14	25	8	20	4	8	2	8	0	0	2	4	1	4
2021-01-29	liaoning	122	109	13	win	28	48	20	0.583	13	30	17	0.433	27	36	9	0.75	12	31	19	0.387	24	42	18	0.571	12	29	0.725	0.343	21	6	14	4	22	27	9	12	8	25	5	7	9	13	1	1	1	2	1	3
2021-01-29	jilin	111	119	-8	lose	28	59	31	0.475	14	32	18	0.438	13	14	1	0.929	10	24	14	0.417	30	65	35	0.462	13	17	0.548	0.289	25	8	9	2	28	16	6	11	9	22	4	11	4	11	4	7	0	0	1	5
2021-01-29	jiangsu	109	122	-13	lose	30	55	25	0.545	12	30	18	0.4	13	18	5	0.722	9	25	16	0.36	32	59	27	0.542	11	23	0.657	0.275	19	8	16	4	27	22	7	13	7	17	1	7	5	15	2	5	6	9	1	3
2021-01-29	guangsha	112	102	10	win	35	58	23	0.603	3	15	12	0.2	33	43	10	0.767	4	6	2	0.667	29	62	33	0.468	14	21	0.6	0.4	19	8	18	4	30	34	8	13	2	11	4	6	6	10	0	2	3	6	3	3
2021-01-29	guangdong	161	109	52	win	43	68	25	0.632	13	30	17	0.433	36	51	15	0.706	16	27	11	0.593	33	64	31	0.516	15	28	0.718	0.395	29	29	16	4	30	35	22	28	9	19	3	8	7	10	1	3	1	3	1	3
2021-01-29	beikong	114	100	14	win	34	59	25	0.576	9	25	16	0.36	19	26	7	0.731	7	19	12	0.368	31	60	29	0.517	9	28	0.718	0.225	20	8	10	4	17	19	5	6	5	15	5	9	8	14	2	6	3	4	4	5
2019-01-30	zhejiang	121	102	19	win	25	43	18	0.581	14	37	23	0.378	29	35	6	0.829	12	33	21	0.364	23	43	20	0.535	10	32	0.727	0.244	24	13	14	5	29	24	10	20	10	24	4	6	7	13	0	1	0	0	3	4
2019-01-30	nanjing	102	121	-19	lose	27	47	20	0.574	6	31	25	0.194	30	34	4	0.882	5	25	20	0.2	24	49	25	0.49	12	31	0.756	0.273	19	10	16	2	24	29	9	14	3	14	2	4	8	18	1	2	1	5	6	12
2019-01-30	jilin	122	99	23	win	37	58	21	0.638	7	24	17	0.292	27	29	2	0.931	3	8	5	0.375	36	69	33	0.522	7	33	0.717	0.226	29	8	10	5	27	25	11	15	6	16	1	3	6	16	0	5	5	8	2	13
2019-01-30	jiangsu	113	79	34	win	29	46	17	0.63	10	28	18	0.357	25	32	7	0.781	13	35	22	0.371	23	36	13	0.639	13	42	0.712	0.419	27	8	17	3	35	33	10	12	9	21	1	5	2	12	2	4	3	5	0	2
2019-01-30	guangzhou	99	122	-23	lose	23	50	27	0.46	12	29	17	0.414	17	35	18	0.486	9	14	5	0.643	23	62	39	0.371	13	24	0.774	0.283	20	6	12	4	25	27	6	9	7	15	0	3	3	16	1	3	1	4	5	15
2019-01-30	beikong	79	113	-34	lose	21	48	27	0.438	6	34	28	0.176	19	38	19	0.5	6	34	28	0.176	21	48	27	0.438	17	18	0.581	0.288	13	8	12	2	33	35	4	11	3	21	2	11	3	11	4	4	3	9	1	5
2021-01-30	zhejiang	115	111	4	win	29	49	20	0.592	10	35	25	0.286	27	30	3	0.9	6	14	8	0.429	31	68	37	0.456	14	30	0.698	0.35	18	5	13	3	24	28	9	16	3	17	1	4	11	20	5	6	0	0	5	10
2021-01-30	tianjin	111	122	-11	lose	16	39	23	0.41	22	43	21	0.512	13	18	5	0.722	6	13	7	0.462	31	68	37	0.456	10	26	0.634	0.244	30	7	16	2	29	20	6	7	16	34	1	5	3	6	1	3	0	2	2	5
2021-01-30	shenzhen	111	115	-4	lose	26	48	22	0.542	14	36	22	0.389	17	26	9	0.654	7	19	12	0.368	29	61	32	0.475	13	26	0.65	0.302	18	5	12	5	28	24	7	14	4	13	3	7	9	11	2	3	2	3	3	4
2021-01-30	shanxi	100	114	-14	lose	28	56	28	0.5	9	28	19	0.321	17	31	14	0.548	5	14	9	0.357	28	66	38	0.424	11	24	0.667	0.25	17	10	9	2	22	23	8	12	6	17	4	11	5	14	0	2	2	3	1	4
2021-01-30	shandong	112	117	-5	lose	30	51	21	0.588	9	28	19	0.321	25	30	5	0.833	4	12	8	0.333	30	62	32	0.484	8	34	0.739	0.216	20	7	23	7	25	29	6	9	9	19	3	7	6	12	1	1	2	2	2	5
2021-01-30	qingdao	117	112	5	win	27	48	21	0.563	13	42	29	0.31	24	27	3	0.889	6	21	15	0.286	33	68	35	0.485	12	29	0.784	0.261	19	10	16	4	29	25	7	9	4	19	1	4	8	16	2	5	4	8	5	10
2021-01-30	guangzhou	114	100	14	win	23	42	19	0.548	13	31	18	0.419	29	35	6	0.829	5	14	9	0.357	28	56	28	0.5	12	33	0.75	0.333	16	6	18	3	23	22	6	8	5	17	4	5	4	8	1	2	5	10	2	3
2021-01-30	fujian	122	111	11	win	31	53	22	0.585	9	29	20	0.31	33	40	7	0.825	3	6	3	0.5	33	72	39	0.458	15	31	0.756	0.366	22	9	10	4	20	29	5	16	7	19	4	8	7	13	1	4	4	5	4	7
2019-01-31	xinjiang	116	96	20	win	37	53	16	0.698	9	20	11	0.45	15	19	4	0.789	10	19	9	0.526	35	53	18	0.66	8	32	0.727	0.32	29	11	15	4	20	20	10	21	6	11	3	4	8	14	2	3	7	8	1	2
2019-01-31	tianjin	100	115	-15	lose	23	43	20	0.535	12	33	21	0.364	18	21	3	0.857	12	28	16	0.429	20	45	25	0.444	8	28	0.571	0.216	13	6	20	3	23	24	4	8	7	21	3	5	12	27	1	1	0	0	6	19
2019-01-31	sichuan	92	119	-27	lose	23	41	18	0.561	11	30	19	0.367	13	21	8	0.619	4	9	5	0.444	27	59	32	0.458	11	26	0.743	0.268	17	1	15	4	20	24	0	1	10	21	5	7	13	22	0	0	0	1	7	11
2019-01-31	ningbo	96	116	-20	lose	19	53	34	0.358	14	27	13	0.519	16	18	2	0.889	19	37	18	0.514	12	41	29	0.293	12	17	0.68	0.273	24	12	19	1	20	20	5	13	11	24	3	11	8	21	2	3	0	6	0	1
2019-01-31	guangsha	115	100	15	win	32	60	28	0.533	11	34	23	0.324	18	26	8	0.692	11	35	24	0.314	30	57	27	0.526	21	29	0.784	0.429	25	11	12	2	24	23	11	19	10	25	3	7	7	18	0	4	4	5	0	4
2019-01-31	beijing	119	92	27	win	34	57	23	0.596	12	25	13	0.48	15	20	5	0.75	9	13	4	0.692	32	64	32	0.5	9	30	0.732	0.257	32	8	5	4	24	20	8	12	7	14	2	8	11	19	4	7	2	5	1	2
2021-01-31	shanghai	95	117	-22	lose	24	57	33	0.421	10	30	20	0.333	17	21	4	0.81	10	28	18	0.357	20	55	35	0.364	20	31	0.816	0.4	20	6	24	2	17	21	5	8	7	18	2	8	4	14	0	4	3	6	0	2
2021-01-31	liaoning	117	95	22	win	36	54	18	0.667	9	29	20	0.31	18	24	6	0.75	10	26	16	0.385	32	54	22	0.593	7	30	0.6	0.184	19	17	9	7	21	17	9	13	3	11	3	5	9	14	1	7	1	3	3	3
2021-01-31	jilin	105	102	3	win	33	54	21	0.611	10	31	21	0.323	9	17	8	0.529	3	9	6	0.333	37	73	36	0.507	13	26	0.634	0.295	23	6	7	5	22	21	5	6	7	15	2	6	10	19	4	7	1	5	7	17
2021-01-31	jiangsu	98	120	-22	lose	27	55	28	0.491	7	27	20	0.259	23	28	5	0.821	10	26	16	0.385	24	56	32	0.429	13	33	0.688	0.283	18	11	23	3	26	27	8	18	7	16	1	4	4	9	1	5	1	3	1	2
2021-01-31	guangdong	120	98	22	win	36	67	31	0.537	11	32	21	0.344	15	26	11	0.577	9	22	13	0.409	34	73	39	0.466	15	33	0.717	0.313	20	14	15	4	27	26	13	22	4	10	2	6	12	25	1	4	3	7	1	2
2021-01-31	beijing	102	105	-3	lose	30	60	30	0.5	9	29	20	0.31	15	20	5	0.75	4	11	7	0.364	31	74	43	0.419	15	31	0.705	0.366	22	5	8	1	21	22	4	10	4	12	4	9	10	20	3	7	2	7	2	6
2019-02-01	zhejiang	116	112	4	win	21	47	26	0.447	15	37	22	0.405	29	37	8	0.784	2	4	2	0.5	31	77	46	0.403	16	24	0.649	0.356	24	13	15	3	27	31	7	11	10	22	2	11	3	13	1	1	1	2	2	4
2019-02-01	shenzhen	99	121	-22	lose	25	47	22	0.532	7	31	24	0.226	28	38	10	0.737	5	16	11	0.313	22	57	35	0.386	12	34	0.654	0.245	23	11	17	1	32	28	5	14	8	24	3	7	7	13	1	3	2	4	2	7
2019-02-01	shanghai	121	86	35	win	38	58	20	0.655	8	22	14	0.364	21	26	5	0.808	14	32	18	0.438	30	46	16	0.652	13	36	0.766	0.419	24	5	10	2	25	23	16	20	2	8	2	3	10	19	5	10	6	7	0	0
2019-02-01	shandong	121	99	22	win	28	52	24	0.538	14	36	22	0.389	23	36	13	0.639	4	17	13	0.235	32	65	33	0.492	18	37	0.755	0.346	30	8	13	4	28	32	10	15	11	25	3	6	6	10	0	4	2	6	4	9
2019-02-01	qingdao	86	121	-35	lose	24	47	23	0.511	8	33	25	0.242	14	25	11	0.56	8	34	26	0.235	19	41	22	0.463	11	18	0.581	0.234	25	5	13	1	23	25	6	16	6	24	3	11	3	11	2	3	2	4	0	1
2019-02-01	nanjing	106	101	5	win	21	51	30	0.412	13	35	22	0.371	25	36	11	0.694	14	37	23	0.378	18	47	29	0.383	20	30	0.625	0.364	26	5	9	3	23	32	5	9	7	22	9	15	4	11	2	4	1	1	4	16
2019-02-01	jilin	95	106	-11	lose	29	63	34	0.46	7	26	19	0.269	16	22	6	0.727	1	3	2	0.333	31	82	51	0.378	12	34	0.739	0.24	16	5	10	6	21	18	10	22	7	17	2	9	9	28	0	1	1	4	9	21
2019-02-01	jiangsu	112	116	-4	lose	31	49	18	0.633	7	21	14	0.333	29	36	7	0.806	0	0	0	0	34	66	32	0.515	13	29	0.644	0.351	21	10	20	3	31	27	9	10	3	11	1	2	4	11	3	4	2	3	2	8
2019-02-01	fujian	106	95	11	win	24	49	25	0.49	16	42	26	0.381	10	17	7	0.588	3	11	8	0.273	35	78	43	0.449	12	38	0.76	0.261	22	7	9	5	18	21	5	15	11	24	6	12	12	25	1	2	3	8	2	8
2019-02-01	beikong	101	106	-5	lose	33	59	26	0.559	6	25	19	0.24	17	23	6	0.739	7	23	16	0.304	29	58	29	0.5	18	35	0.636	0.375	22	8	14	3	32	23	9	9	5	21	3	5	3	6	0	3	4	7	3	8
2021-02-01	xinjiang	112	101	11	win	30	57	27	0.526	14	28	14	0.5	10	14	4	0.714	9	18	9	0.5	29	61	32	0.475	15	23	0.742	0.375	26	10	19	3	17	19	7	11	13	26	2	9	3	11	0	0	7	10	1	1
2021-02-01	sichuan	104	91	13	win	28	46	18	0.609	11	28	17	0.393	15	19	4	0.789	6	9	3	0.667	28	60	32	0.467	5	31	0.705	0.147	20	7	7	2	21	17	4	7	5	15	5	9	10	11	2	3	4	8	0	1
2021-02-01	shanxi	101	112	-11	lose	27	52	25	0.519	12	25	13	0.48	11	17	6	0.647	9	13	4	0.692	27	61	34	0.443	8	25	0.625	0.258	22	11	21	2	19	17	4	9	6	13	3	9	7	13	5	7	2	3	1	2
2021-02-01	shandong	121	125	-4	lose	35	54	19	0.648	9	23	14	0.391	24	32	8	0.75	7	12	5	0.583	33	61	28	0.541	13	23	0.639	0.433	22	6	18	3	30	29	6	9	7	11	3	7	10	15	1	2	6	10	2	4
2021-02-01	qingdao	111	106	5	win	25	46	21	0.543	16	45	29	0.356	13	17	4	0.765	20	45	25	0.444	17	42	25	0.405	17	32	0.78	0.386	26	6	13	0	19	25	5	14	12	28	4	12	4	9	2	5	3	4	0	0
2021-02-01	guangzhou	91	104	-13	lose	27	52	25	0.519	8	29	21	0.276	13	22	9	0.591	4	11	7	0.364	29	68	39	0.426	13	29	0.853	0.295	11	3	7	3	17	21	4	6	5	22	3	6	7	10	0	0	3	9	1	1
2021-02-01	guangsha	125	121	4	win	40	64	24	0.625	6	17	11	0.353	27	35	8	0.771	7	13	6	0.538	31	60	29	0.517	13	17	0.567	0.361	25	10	13	5	29	30	7	8	5	8	2	5	6	13	4	7	5	9	0	1
2021-02-01	fujian	106	111	-5	lose	24	46	22	0.522	15	37	22	0.405	13	15	2	0.867	16	42	26	0.381	22	40	18	0.55	9	27	0.614	0.22	24	7	13	2	25	19	10	13	7	19	5	17	4	11	2	2	1	3	2	4
2021-02-02	zhejiang	113	99	14	win	21	41	20	0.512	15	29	14	0.517	26	30	4	0.867	5	9	4	0.556	29	59	30	0.492	11	28	0.667	0.333	23	2	17	4	16	25	4	8	8	16	1	3	4	9	4	7	0	0	2	5
2021-02-02	tianjin	99	113	-14	lose	28	55	27	0.509	10	27	17	0.37	13	17	4	0.765	6	15	9	0.4	30	65	35	0.462	14	22	0.667	0.333	20	12	10	2	25	16	9	15	5	13	1	4	4	8	1	2	2	5	4	8
2021-02-02	shenzhen	106	93	13	win	22	48	26	0.458	14	37	23	0.378	20	28	8	0.714	13	23	10	0.565	22	61	39	0.361	8	25	0.641	0.17	21	11	6	7	26	24	8	14	9	21	1	4	8	17	2	8	1	2	5	7
2021-02-02	nanjing	93	106	-13	lose	27	58	31	0.466	6	20	14	0.3	21	30	9	0.7	3	8	5	0.375	29	69	40	0.42	14	39	0.83	0.359	13	4	20	5	24	26	9	16	3	14	2	3	3	7	1	4	1	8	1	1
2021-02-03	xinjiang	106	88	18	win	30	54	24	0.556	11	34	23	0.324	13	22	9	0.591	17	39	22	0.436	22	47	25	0.468	11	35	0.875	0.256	24	10	11	3	20	22	5	11	6	12	1	2	2	10	2	4	10	16	0	0
2021-02-03	sichuan	110	109	1	win	37	67	30	0.552	5	17	12	0.294	21	29	8	0.724	6	19	13	0.316	31	60	29	0.517	16	37	0.755	0.39	18	4	18	2	20	27	8	9	5	15	2	7	6	11	1	1	6	12	2	3
2021-02-03	shanghai	98	93	5	win	20	52	32	0.385	12	30	18	0.4	22	25	3	0.88	11	24	13	0.458	20	57	37	0.351	23	31	0.756	0.489	15	6	13	2	19	24	5	9	5	14	3	10	8	25	1	2	0	0	5	8
2021-02-03	shandong	115	99	16	win	31	46	15	0.674	12	34	22	0.353	17	22	5	0.773	7	22	15	0.318	31	53	22	0.585	8	32	0.78	0.211	30	10	14	4	18	20	14	15	11	28	3	10	2	7	0	0	1	4	2	3
2021-02-03	qingdao	109	110	-1	lose	30	54	24	0.556	12	35	23	0.343	13	22	9	0.591	11	24	13	0.458	28	62	34	0.452	12	25	0.61	0.245	20	8	9	1	27	20	6	9	7	20	1	4	5	12	2	3	5	8	3	7
2021-02-03	liaoning	115	118	-3	lose	28	41	13	0.683	10	27	17	0.37	29	32	3	0.906	3	9	6	0.333	30	54	24	0.556	1	33	0.767	0.045	23	5	19	5	28	25	6	9	4	12	3	7	7	13	3	5	2	4	0	3
2021-02-03	jiangsu	90	94	-4	lose	25	52	27	0.481	8	21	13	0.381	16	21	5	0.762	7	17	10	0.412	22	52	30	0.423	7	24	0.6	0.189	23	8	14	2	25	26	4	6	3	6	2	4	5	17	3	5	4	6	2	9
2021-02-03	guangzhou	93	98	-5	lose	29	56	27	0.518	10	25	15	0.4	5	9	4	0.556	12	27	15	0.444	22	49	27	0.449	10	24	0.511	0.244	26	4	12	9	24	19	1	3	9	20	3	9	4	12	0	1	8	10	0	0
2021-02-03	guangsha	94	90	4	win	28	60	32	0.467	7	22	15	0.318	17	23	6	0.739	12	22	10	0.545	22	59	37	0.373	16	30	0.811	0.4	23	7	15	6	26	25	2	5	7	21	2	4	3	7	4	7	5	9	1	1
2021-02-03	guangdong	118	115	3	win	33	61	28	0.541	7	27	20	0.259	31	41	10	0.756	0	3	3	0	38	83	45	0.458	10	21	0.955	0.233	17	11	9	1	25	28	8	9	6	15	3	8	10	27	0	3	1	1	3	7
2021-02-03	fujian	99	115	-16	lose	31	57	26	0.544	9	24	15	0.375	10	15	5	0.667	8	17	9	0.471	31	63	32	0.492	9	30	0.789	0.22	21	5	15	1	20	18	7	10	6	13	3	8	5	11	3	4	6	8	4	7
2021-02-03	beijing	88	106	-18	lose	25	46	21	0.543	10	28	18	0.357	8	19	11	0.421	9	28	19	0.321	24	44	20	0.545	5	32	0.744	0.125	17	5	17	4	22	20	9	16	3	11	3	10	6	13	3	5	1	3	2	4
2021-02-04	zhejiang	112	102	10	win	17	47	30	0.362	17	38	21	0.447	27	34	7	0.794	7	15	8	0.467	25	68	43	0.368	15	30	0.714	0.3	19	4	8	2	23	24	7	8	7	17	1	4	5	20	6	8	0	1	4	16
2021-02-04	tianjin	100	108	-8	lose	25	46	21	0.543	14	35	21	0.4	8	13	5	0.615	13	32	19	0.406	23	46	23	0.5	8	30	0.882	0.205	27	6	20	2	23	19	8	10	12	24	3	8	7	14	1	6	1	2	3	4
2021-02-04	shenzhen	121	111	10	win	30	48	18	0.625	16	39	23	0.41	13	17	4	0.765	13	30	17	0.433	31	55	24	0.564	8	28	0.757	0.229	28	10	13	1	21	18	12	20	9	16	5	11	10	16	1	4	0	2	3	8
2021-02-04	shanxi	108	100	8	win	29	47	18	0.617	10	24	14	0.417	20	28	8	0.714	10	25	15	0.4	28	45	17	0.622	4	31	0.795	0.118	23	16	14	8	19	23	9	11	5	13	4	7	4	10	0	2	3	8	0	1
2021-02-04	jilin	111	121	-10	lose	36	55	19	0.655	8	31	23	0.258	15	18	3	0.833	7	21	14	0.333	35	63	28	0.556	9	27	0.771	0.243	21	5	17	3	18	21	1	7	4	13	3	3	12	18	3	11	1	2	4	12
2021-02-04	beikong	102	112	-10	lose	36	67	31	0.537	3	15	12	0.2	21	27	6	0.778	5	16	11	0.313	33	65	32	0.508	12	35	0.7	0.286	13	4	12	3	24	23	7	12	0	7	2	5	15	26	3	5	1	2	2	6
2021-02-05	sichuan	115	102	13	win	30	55	25	0.545	12	22	10	0.545	19	25	6	0.76	7	8	1	0.875	31	65	34	0.477	13	38	0.792	0.394	20	2	21	8	19	27	6	10	9	16	2	5	8	15	3	3	6	10	3	5
2021-02-05	shanghai	109	101	8	win	21	46	25	0.457	14	34	20	0.412	25	29	4	0.862	8	16	8	0.5	26	63	37	0.413	11	36	0.706	0.289	22	3	17	5	23	29	3	5	8	22	5	9	5	9	0	1	1	3	2	4
2021-02-05	shandong	112	131	-19	lose	36	59	23	0.61	5	27	22	0.185	25	30	5	0.833	5	15	10	0.333	29	64	35	0.453	12	32	0.711	0.293	23	6	20	4	24	30	7	12	5	15	4	7	8	14	0	1	4	7	2	11
2021-02-05	qingdao	101	109	-8	lose	28	55	27	0.509	11	39	28	0.282	12	21	9	0.571	6	16	10	0.375	30	75	45	0.4	15	27	0.711	0.294	20	10	14	4	29	23	11	15	7	16	3	8	5	16	1	4	0	3	2	5
2021-02-05	liaoning	102	115	-13	lose	25	61	36	0.41	12	31	19	0.387	16	21	5	0.762	6	13	7	0.462	28	76	48	0.368	10	20	0.606	0.208	21	9	8	9	27	19	7	16	9	18	2	6	10	20	2	5	1	5	0	1
2021-02-05	jiangsu	96	103	-7	lose	22	50	28	0.44	13	29	16	0.448	13	14	1	0.929	13	30	17	0.433	20	47	27	0.426	9	28	0.778	0.237	23	4	15	3	24	18	1	5	7	19	4	11	3	14	1	4	3	5	0	0
2021-02-05	guangzhou	89	104	-15	lose	23	42	19	0.548	12	32	20	0.375	7	10	3	0.7	13	24	11	0.542	22	50	28	0.44	14	20	0.833	0.389	22	4	15	2	25	18	3	4	10	27	2	7	1	10	0	1	5	7	0	0
2021-02-05	guangsha	104	89	15	win	28	45	17	0.622	9	19	10	0.474	21	25	4	0.84	11	21	10	0.524	21	38	17	0.553	4	22	0.611	0.167	25	8	11	3	18	25	3	5	8	20	4	5	5	8	1	1	2	4	1	2
2021-02-05	guangdong	131	112	19	win	36	57	21	0.632	14	40	26	0.35	17	22	5	0.773	8	29	21	0.276	36	62	26	0.581	13	29	0.707	0.289	25	11	12	4	30	24	11	23	8	16	0	4	4	8	5	8	3	3	4	4
2021-02-05	fujian	103	96	7	win	29	47	18	0.617	12	33	21	0.364	9	11	2	0.818	11	34	23	0.324	25	41	16	0.61	8	29	0.763	0.222	25	8	12	1	18	24	7	8	5	17	4	10	10	17	4	7	5	6	2	4
2021-02-06	zhejiang	93	99	-6	lose	25	55	30	0.455	5	23	18	0.217	28	32	4	0.875	2	9	7	0.222	26	67	41	0.388	13	28	0.7	0.342	16	6	15	1	18	28	3	8	4	10	3	9	5	14	2	8	0	0	1	9
2021-02-06	xinjiang	99	93	6	win	32	51	19	0.627	9	30	21	0.3	8	17	9	0.471	6	18	12	0.333	34	62	28	0.548	12	25	0.658	0.3	28	8	13	5	28	18	5	9	7	21	1	3	3	6	2	5	5	11	1	1
2021-02-06	tianjin	84	101	-17	lose	27	52	25	0.519	6	29	23	0.207	12	14	2	0.857	1	4	3	0.25	28	73	45	0.384	5	24	0.6	0.114	17	10	11	6	24	18	3	4	3	16	1	3	6	15	0	5	1	3	6	15
2021-02-06	shenzhen	106	114	-8	lose	19	44	25	0.432	17	43	26	0.395	17	21	4	0.81	10	20	10	0.5	20	61	41	0.328	11	27	0.587	0.229	20	9	12	1	28	22	8	12	7	21	1	7	4	11	3	6	1	3	4	16
2021-02-06	shanxi	94	92	2	win	23	46	23	0.5	9	26	17	0.346	21	27	6	0.778	2	8	6	0.25	27	61	34	0.443	9	31	0.738	0.257	19	8	14	4	25	25	5	6	6	16	4	11	6	13	1	6	0	2	2	5
2021-02-06	nanjing	92	94	-2	lose	21	43	22	0.488	10	32	22	0.313	20	26	6	0.769	2	7	5	0.286	28	67	39	0.418	11	26	0.743	0.262	16	8	14	0	25	25	4	7	5	18	2	6	4	8	1	6	1	6	3	5
2021-02-06	beikong	114	106	8	win	33	51	18	0.647	9	32	23	0.281	21	36	15	0.583	4	11	7	0.364	34	68	34	0.5	19	37	0.771	0.413	31	7	17	5	22	28	5	9	8	25	5	11	8	11	3	5	0	1	2	4
2021-02-06	beijing	101	84	17	win	23	42	19	0.548	11	33	22	0.333	22	28	6	0.786	2	7	5	0.286	30	66	36	0.455	16	39	0.886	0.4	18	4	17	6	18	24	2	5	9	23	3	5	9	15	1	3	0	3	2	3
2019-02-10	jilin	131	114	17	win	36	60	24	0.6	15	30	15	0.5	14	17	3	0.824	17	30	13	0.567	33	59	26	0.559	15	26	0.722	0.455	31	9	12	2	23	18	10	18	13	24	0	3	6	10	3	6	7	9	2	4
2019-02-10	guangsha	114	131	-17	lose	34	54	20	0.63	10	33	23	0.303	16	18	2	0.889	12	34	22	0.353	30	51	21	0.588	10	18	0.545	0.278	23	7	13	2	18	23	12	17	4	16	6	10	10	18	1	7	1	3	0	0
2019-02-12	zhejiang	113	102	11	win	31	50	19	0.62	12	37	25	0.324	15	20	5	0.75	7	13	6	0.538	34	72	38	0.472	20	29	0.707	0.455	20	11	21	4	27	24	17	21	9	28	2	6	5	12	2	2	0	0	0	2
2019-02-12	xinjiang	120	115	5	win	34	57	23	0.596	9	32	23	0.281	25	36	11	0.694	8	22	14	0.364	26	58	32	0.448	13	28	0.737	0.277	27	7	11	3	29	30	10	13	5	15	5	10	10	22	1	1	1	4	3	13
2019-02-12	sichuan	96	120	-24	lose	26	55	29	0.473	8	29	21	0.276	20	27	7	0.741	9	38	29	0.237	20	41	21	0.488	13	28	0.683	0.277	17	6	9	1	17	23	6	11	7	26	3	11	6	16	0	4	2	7	1	3
2019-02-12	shanxi	115	120	-5	lose	34	64	30	0.531	7	24	17	0.292	26	32	6	0.813	7	23	16	0.304	30	61	31	0.492	10	34	0.723	0.263	18	7	12	1	30	29	9	12	6	16	5	7	14	29	0	4	1	3	7	14
2019-02-12	shanghai	110	104	6	win	30	57	27	0.526	7	19	12	0.368	29	41	12	0.707	10	21	11	0.476	25	53	28	0.472	11	33	0.805	0.289	17	5	15	4	22	31	9	14	5	9	3	5	14	26	1	3	0	2	2	8
2019-02-12	shandong	117	99	18	win	39	59	20	0.661	8	24	16	0.333	15	23	8	0.652	11	22	11	0.5	33	58	25	0.569	10	35	0.66	0.263	27	8	13	5	26	26	14	20	7	16	2	5	6	12	2	5	4	9	2	3
2019-02-12	nanjing	99	111	-12	lose	19	36	17	0.528	17	42	25	0.405	10	12	2	0.833	5	17	12	0.294	29	59	30	0.492	7	32	0.653	0.175	17	6	16	4	28	17	4	6	7	16	3	7	10	20	3	4	1	1	5	13
2019-02-12	liaoning	111	99	12	win	27	55	28	0.491	10	24	14	0.417	27	38	11	0.711	8	14	6	0.571	27	63	36	0.429	17	33	0.825	0.347	15	13	11	1	17	28	8	13	8	17	1	3	2	10	1	3	3	4	3	12
2019-02-12	jiangsu	120	96	24	win	28	46	18	0.609	18	40	22	0.45	10	13	3	0.769	18	42	24	0.429	23	39	16	0.59	13	34	0.723	0.317	21	5	12	1	23	17	6	8	11	30	3	6	8	12	2	5	7	11	5	6
2019-02-12	guangzhou	97	93	4	win	22	53	31	0.415	8	21	13	0.381	29	35	6	0.829	7	12	5	0.583	22	61	39	0.361	14	25	0.735	0.311	15	8	10	2	26	28	4	7	8	14	1	8	7	22	1	1	0	3	3	12
2019-02-12	guangsha	102	113	-11	lose	21	38	17	0.553	11	35	24	0.314	27	34	7	0.794	2	7	5	0.286	28	64	36	0.438	12	24	0.545	0.293	17	16	21	1	24	27	7	9	7	26	2	6	4	9	1	4	4	8	0	1
2019-02-12	guangdong	104	110	-6	lose	38	57	19	0.667	4	28	24	0.143	16	23	7	0.696	9	35	26	0.257	32	49	17	0.653	8	27	0.711	0.195	24	9	11	10	31	22	11	21	5	21	8	10	11	21	1	3	1	1	1	2
2019-02-12	beikong	99	117	-18	lose	27	55	28	0.491	9	32	23	0.281	18	31	13	0.581	9	24	15	0.375	23	59	36	0.39	18	28	0.737	0.34	17	7	15	3	26	26	4	11	5	12	2	8	6	15	3	9	5	9	0	2
2019-02-12	beijing	93	97	-4	lose	20	32	12	0.625	12	38	26	0.316	17	29	12	0.586	9	25	16	0.36	19	41	22	0.463	9	31	0.689	0.265	19	4	19	5	28	26	1	6	8	20	1	2	8	11	2	6	4	5	1	2
2019-02-13	tianjin	112	135	-23	lose	18	37	19	0.486	21	48	27	0.438	13	15	2	0.867	2	5	3	0.4	35	78	43	0.449	9	23	0.657	0.209	19	7	8	2	17	19	5	9	5	19	4	6	4	6	3	3	0	0	1	2
2019-02-13	shenzhen	122	108	14	win	30	43	13	0.698	14	26	12	0.538	20	26	6	0.769	14	28	14	0.5	28	39	11	0.718	5	27	0.628	0.227	30	6	17	2	25	26	9	16	10	20	2	3	4	5	4	5	2	2	2	2
2019-02-13	qingdao	109	121	-12	lose	32	64	32	0.5	9	24	15	0.375	18	20	2	0.9	4	10	6	0.4	33	74	41	0.446	16	19	0.679	0.372	24	6	13	1	21	27	11	15	3	10	8	14	14	27	1	2	1	5	5	7
2019-02-13	ningbo	108	122	-14	lose	26	58	32	0.448	12	32	20	0.375	20	24	4	0.833	13	40	27	0.325	23	48	25	0.479	16	17	0.773	0.372	12	13	9	3	26	25	6	11	7	24	4	6	7	12	0	1	1	4	0	5
2019-02-13	jilin	121	109	12	win	39	55	16	0.709	9	26	17	0.346	16	20	4	0.8	4	9	5	0.444	41	69	28	0.594	9	27	0.628	0.321	32	11	13	5	27	21	9	13	8	16	2	4	12	16	0	5	2	4	6	10
2019-02-13	fujian	135	112	23	win	26	42	16	0.619	23	41	18	0.561	14	24	10	0.583	2	5	3	0.4	44	75	31	0.587	12	34	0.791	0.343	28	6	9	3	19	17	12	20	15	23	2	4	5	11	1	1	3	7	0	1
2019-02-14	shanxi	126	136	-10	lose	28	51	23	0.549	15	39	24	0.385	25	32	7	0.781	8	16	8	0.5	33	72	39	0.458	8	24	0.667	0.19	23	6	7	1	27	27	8	15	8	18	4	6	4	14	1	6	4	8	1	8
2019-02-14	liaoning	119	96	23	win	25	44	19	0.568	13	43	30	0.302	30	36	6	0.833	15	45	30	0.333	23	42	19	0.548	14	39	0.848	0.298	27	13	14	1	29	28	10	18	8	23	3	6	7	13	0	2	2	3	2	4
2019-02-14	jiangsu	96	119	-23	lose	24	47	23	0.511	5	29	24	0.172	33	38	5	0.868	8	32	24	0.25	17	40	23	0.425	7	33	0.702	0.152	15	10	19	2	28	29	11	21	4	12	2	8	9	16	1	5	1	5	1	2
2019-02-14	guangzhou	136	126	10	win	31	51	20	0.608	15	34	19	0.441	29	36	7	0.806	9	16	7	0.563	32	64	32	0.5	12	34	0.81	0.333	24	5	14	5	27	27	8	10	10	22	2	6	12	21	1	1	2	3	6	10
2019-02-14	beikong	104	105	-1	lose	30	57	27	0.526	10	24	14	0.417	14	18	4	0.778	7	15	8	0.467	31	64	33	0.484	13	27	0.794	0.361	16	5	14	3	19	19	5	8	8	19	3	6	11	27	0	0	5	8	4	16
2019-02-14	beijing	105	104	1	win	19	41	22	0.463	15	32	17	0.469	22	23	1	0.957	11	28	17	0.393	21	43	22	0.488	7	23	0.639	0.206	23	10	11	8	19	19	7	11	12	25	2	7	4	18	0	0	1	2	3	4
2019-02-15	zhejiang	101	115	-14	lose	32	51	19	0.627	7	39	32	0.179	16	30	14	0.533	2	5	3	0.4	35	83	48	0.422	15	22	0.647	0.273	20	7	10	5	31	24	7	14	8	23	4	5	8	15	0	1	0	1	0	3
2019-02-15	xinjiang	98	117	-19	lose	30	54	24	0.556	8	32	24	0.25	14	22	8	0.636	12	45	33	0.267	24	39	15	0.615	12	30	0.732	0.261	8	9	13	0	21	22	5	12	4	18	2	3	9	17	0	0	4	6	5	8
2019-02-15	tianjin	92	106	-14	lose	23	35	12	0.657	10	39	29	0.256	16	22	6	0.727	12	35	23	0.343	21	39	18	0.538	11	29	0.69	0.289	19	10	17	3	23	19	7	11	6	28	1	4	6	13	1	1	0	0	9	15
2019-02-15	sichuan	96	77	19	win	28	48	20	0.583	9	31	22	0.29	13	20	7	0.65	6	21	15	0.286	28	55	27	0.509	13	30	0.789	0.361	23	6	12	3	23	19	4	8	6	19	7	14	11	18	4	5	4	8	1	2
2019-02-15	shandong	106	92	14	win	34	55	21	0.618	8	30	22	0.267	14	20	6	0.7	10	28	18	0.357	30	55	25	0.545	13	27	0.711	0.31	31	11	13	1	19	23	13	19	7	27	2	2	4	9	2	4	5	8	3	5
2019-02-15	ningbo	124	123	1	win	35	62	27	0.565	8	25	17	0.32	30	40	10	0.75	8	29	21	0.276	31	54	23	0.574	20	32	0.681	0.426	20	8	19	4	19	25	12	14	5	20	3	9	6	18	1	4	3	6	1	3
2019-02-15	nanjing	77	96	-19	lose	20	37	17	0.541	4	27	23	0.148	25	33	8	0.758	2	17	15	0.118	19	44	25	0.432	8	23	0.639	0.211	10	5	13	5	19	23	1	5	1	7	7	14	13	21	0	1	2	4	2	4
2019-02-15	guangdong	115	101	14	win	27	49	22	0.551	10	24	14	0.417	31	39	8	0.795	2	5	3	0.4	34	67	33	0.507	12	40	0.727	0.353	22	3	15	6	24	31	11	17	8	18	2	6	7	12	1	2	1	3	0	1
2019-02-15	fujian	117	98	19	win	30	45	15	0.667	15	40	25	0.375	12	19	7	0.632	22	50	28	0.44	22	34	12	0.647	11	34	0.739	0.268	19	8	11	2	22	21	3	9	10	21	5	7	11	17	4	7	1	4	4	9
2019-02-28	xinjiang	109	96	13	win	36	60	24	0.6	6	26	20	0.231	19	24	5	0.792	10	29	19	0.345	29	54	25	0.537	13	32	0.865	0.361	19	5	8	1	18	22	11	18	3	9	5	9	6	16	2	9	6	8	4	8
2019-02-28	tianjin	126	125	1	win	28	46	18	0.609	16	49	33	0.327	22	28	6	0.786	6	29	23	0.207	32	60	28	0.533	15	33	0.805	0.319	15	6	10	3	25	26	7	10	9	34	1	4	14	19	1	2	0	0	12	20
2019-02-28	sichuan	98	115	-17	lose	19	45	26	0.422	17	44	27	0.386	9	17	8	0.529	8	24	16	0.333	25	62	37	0.403	12	42	0.764	0.24	23	2	17	2	20	20	7	9	9	22	2	6	7	16	3	6	1	6	1	3
2019-02-28	shenzhen	100	111	-11	lose	24	52	28	0.462	14	31	17	0.452	10	12	2	0.833	10	19	9	0.526	27	63	36	0.429	9	30	0.536	0.214	18	7	15	3	18	13	11	18	12	26	3	7	6	18	0	0	0	0	0	4
2019-02-28	shanxi	100	91	9	win	23	46	23	0.5	11	27	16	0.407	21	26	5	0.808	3	8	5	0.375	28	62	34	0.452	6	36	0.783	0.162	20	5	15	0	21	23	9	16	9	18	3	5	6	14	2	5	2	3	2	3
2019-02-28	shandong	113	104	9	win	37	63	26	0.587	6	27	21	0.222	21	29	8	0.724	0	6	6	0	40	81	41	0.494	19	33	0.767	0.413	29	8	13	3	27	27	10	21	4	20	2	5	5	10	1	2	2	4	0	0
2019-02-28	ningbo	91	100	-9	lose	27	55	28	0.491	6	29	23	0.207	19	24	5	0.792	2	8	6	0.25	30	75	45	0.4	10	31	0.838	0.217	21	11	10	3	23	21	7	18	5	20	1	7	8	19	0	1	0	2	1	1
2019-02-28	nanjing	79	114	-35	lose	27	61	34	0.443	2	19	17	0.105	19	24	5	0.792	6	21	15	0.286	21	57	36	0.368	17	17	0.607	0.362	14	10	18	3	19	23	1	5	4	7	2	4	14	40	1	3	3	7	8	27
2019-02-28	liaoning	111	100	11	win	34	68	34	0.5	8	31	23	0.258	19	25	6	0.76	6	14	8	0.429	33	82	49	0.402	26	33	0.786	0.464	18	10	11	4	13	18	8	18	9	29	2	8	8	16	0	1	1	3	1	6
2019-02-28	guangsha	104	113	-9	lose	27	47	20	0.574	12	37	25	0.324	14	20	6	0.7	4	8	4	0.5	32	73	41	0.438	10	27	0.587	0.233	24	8	15	5	27	27	7	11	13	33	2	5	7	14	0	3	2	6	0	0
2019-02-28	guangdong	114	79	35	win	33	51	18	0.647	11	24	13	0.458	15	22	7	0.682	15	32	17	0.469	28	42	14	0.667	11	30	0.638	0.393	33	12	18	9	23	19	9	9	14	31	5	6	8	12	0	0	2	4	1	3
2019-02-28	fujian	115	98	17	win	35	68	33	0.515	11	32	21	0.344	12	16	4	0.75	6	20	14	0.3	35	75	40	0.467	13	38	0.76	0.236	24	12	6	4	20	20	11	19	4	17	4	7	12	24	3	5	2	7	1	3
2019-02-28	beikong	125	126	-1	lose	31	56	25	0.554	15	34	19	0.441	18	20	2	0.9	5	16	11	0.313	36	69	33	0.522	8	32	0.681	0.195	17	4	11	2	26	25	5	7	7	16	7	9	17	27	1	2	0	1	9	21
2019-02-28	beijing	96	109	-13	lose	24	46	22	0.522	11	28	17	0.393	15	19	4	0.789	13	31	18	0.419	19	40	21	0.475	5	23	0.639	0.135	22	6	12	1	22	18	9	15	9	21	4	9	9	19	1	3	0	2	0	2
2021-03-01	sichuan	103	94	9	win	27	52	25	0.519	9	27	18	0.333	22	28	6	0.786	2	11	9	0.182	28	62	34	0.452	14	43	0.86	0.333	17	6	20	2	23	28	3	4	4	15	2	6	6	13	1	2	6	15	0	1
2021-03-01	shanghai	120	114	6	win	30	50	20	0.6	15	31	16	0.484	15	24	9	0.625	13	25	12	0.52	28	52	24	0.538	19	34	0.708	0.514	19	8	24	8	24	24	13	18	6	14	1	3	6	15	1	3	1	2	1	5
2021-03-01	shandong	114	120	-6	lose	26	51	25	0.51	17	38	21	0.447	11	18	7	0.611	6	16	10	0.375	35	71	36	0.493	14	18	0.486	0.292	20	11	14	2	24	24	8	14	9	18	3	5	7	12	1	2	1	4	0	1
2021-03-01	qingdao	113	90	23	win	27	54	27	0.5	13	37	24	0.351	20	29	9	0.69	14	32	18	0.438	21	54	33	0.389	18	42	0.792	0.34	27	8	20	6	30	30	6	10	7	19	7	12	7	16	2	3	2	3	1	6
2021-03-01	liaoning	110	97	13	win	26	45	19	0.578	12	38	26	0.316	22	27	5	0.815	7	22	15	0.318	30	60	30	0.5	14	36	0.837	0.318	29	8	9	4	20	17	3	8	8	19	2	7	6	9	5	9	1	1	2	6
2021-03-01	jiangsu	94	103	-9	lose	30	60	30	0.5	6	23	17	0.261	16	24	8	0.667	5	26	21	0.192	24	50	26	0.48	7	28	0.667	0.14	16	5	13	4	28	23	7	12	1	11	3	4	11	16	4	7	1	2	2	4
2021-03-01	guangzhou	98	105	-7	lose	22	44	22	0.5	14	33	19	0.424	12	18	6	0.667	13	24	11	0.542	20	50	30	0.4	12	27	0.818	0.3	21	5	19	1	29	28	6	9	9	21	3	7	5	9	0	2	6	8	1	3
2021-03-01	guangsha	90	113	-23	lose	29	68	39	0.426	2	15	13	0.133	26	40	14	0.65	6	27	21	0.222	23	54	31	0.426	11	35	0.66	0.208	16	14	15	5	30	30	11	20	3	12	2	6	5	19	1	3	0	1	0	3
2021-03-01	guangdong	105	98	7	win	20	39	19	0.513	15	32	17	0.469	20	26	6	0.769	9	21	12	0.429	24	48	24	0.5	6	28	0.7	0.182	15	11	15	3	28	29	10	18	6	11	2	5	4	11	1	5	1	2	2	6
2021-03-01	fujian	97	110	-13	lose	29	49	20	0.592	9	30	21	0.3	12	17	5	0.706	10	20	10	0.5	23	54	31	0.426	7	30	0.682	0.163	25	6	12	3	17	20	10	20	7	21	5	11	9	14	1	4	0	0	3	5
2022-03-01	zhejiang	146	106	40	win	29	47	18	0.617	20	39	19	0.513	28	33	5	0.848	6	8	2	0.75	41	76	35	0.539	16	37	0.755	0.432	40	12	17	7	29	23	12	20	11	20	3	4	4	6	5	8	1	1	0	4
2022-03-01	xinjiang	65	106	-41	lose	23	51	28	0.451	2	22	20	0.091	13	22	9	0.591	2	5	3	0.4	21	66	45	0.318	9	33	0.767	0.18	18	8	19	2	24	21	1	9	3	11	4	8	6	12	1	5	2	7	1	3
2022-03-01	tianjin	106	110	-4	lose	22	41	19	0.537	15	39	24	0.385	17	22	5	0.773	4	9	5	0.444	32	70	38	0.457	7	37	0.787	0.184	19	4	16	5	24	18	6	11	4	16	4	9	7	14	6	6	0	1	4	8
2022-03-01	shanxi	106	146	-40	lose	26	66	40	0.394	8	22	14	0.364	30	34	4	0.882	3	4	1	0.75	26	79	53	0.329	12	21	0.568	0.245	22	10	15	5	23	29	10	15	3	9	1	3	4	15	2	4	1	5	1	5
2022-03-01	shanghai	134	110	24	win	31	53	22	0.585	14	30	16	0.467	30	37	7	0.811	4	10	6	0.4	34	66	32	0.515	12	35	0.729	0.308	28	10	11	4	27	30	12	20	11	21	7	11	5	9	0	2	1	6	1	3
2022-03-01	shandong	101	127	-26	lose	22	53	31	0.415	10	33	23	0.303	27	34	7	0.794	6	14	8	0.429	23	69	46	0.333	15	22	0.733	0.288	18	11	14	2	21	27	6	14	3	12	5	13	6	11	3	9	3	5	1	3
2022-03-01	qingdao	108	85	23	win	27	49	22	0.551	12	25	13	0.48	18	24	6	0.75	9	13	4	0.692	24	55	31	0.436	11	35	0.648	0.314	28	13	24	6	29	25	12	18	8	14	1	3	3	11	0	1	3	4	2	6
2022-03-01	nanjing	110	134	-24	lose	24	51	27	0.471	14	43	29	0.326	20	26	6	0.769	5	14	9	0.357	31	78	47	0.397	13	27	0.692	0.271	24	4	11	7	30	27	2	6	8	21	4	7	6	10	2	4	2	5	1	4
2022-03-01	liaoning	85	108	-23	lose	19	55	36	0.345	10	28	18	0.357	17	28	11	0.607	5	9	4	0.556	23	73	50	0.315	19	24	0.686	0.352	10	14	19	4	25	29	4	5	1	10	4	8	2	9	1	1	3	5	0	5
2022-03-01	guangzhou	110	106	4	win	27	60	33	0.45	13	29	16	0.448	17	22	5	0.773	2	5	3	0.4	37	83	46	0.446	10	31	0.816	0.213	29	8	9	2	18	24	7	12	9	18	4	14	4	18	1	6	4	8	0	5
2022-03-01	guangdong	127	101	26	win	36	57	21	0.632	11	25	14	0.44	22	25	3	0.88	4	6	2	0.667	41	74	33	0.554	8	37	0.712	0.267	32	11	14	4	27	21	11	15	6	13	5	9	6	14	3	5	0	1	1	2
2022-03-01	beijing	106	65	41	win	31	55	24	0.564	9	28	19	0.321	17	26	9	0.654	4	9	5	0.444	31	69	38	0.449	10	41	0.82	0.233	30	5	13	7	21	24	7	11	10	25	2	6	4	7	0	1	1	2	1	2
2021-03-02	zhejiang	119	86	33	win	29	46	17	0.63	11	30	19	0.367	28	33	5	0.848	6	14	8	0.429	31	59	28	0.525	13	28	0.737	0.361	24	10	14	3	28	34	13	17	8	19	2	2	6	6	4	8	0	2	1	3
2021-03-02	xinjiang	103	104	-1	lose	29	49	20	0.592	10	34	24	0.294	15	21	6	0.714	2	11	9	0.182	34	69	35	0.493	9	40	0.769	0.237	27	6	24	4	24	24	6	12	4	19	4	7	10	13	2	8	4	9	1	2
2021-03-02	shenzhen	104	103	1	win	28	54	26	0.519	11	36	25	0.306	15	26	11	0.577	4	16	12	0.25	30	69	39	0.435	12	29	0.763	0.231	20	16	15	5	24	24	12	20	4	13	2	8	5	13	3	5	0	1	1	2
2021-03-02	shanxi	116	107	9	win	34	54	20	0.63	13	32	19	0.406	9	13	4	0.692	6	19	13	0.316	37	63	26	0.587	12	32	0.744	0.343	28	4	15	2	21	20	10	14	4	17	4	8	8	16	3	5	5	7	1	3
2021-03-02	nanjing	86	119	-33	lose	21	43	22	0.488	6	23	17	0.261	26	35	9	0.743	5	8	3	0.625	20	56	36	0.357	10	23	0.639	0.263	16	8	24	1	34	28	5	9	5	11	2	8	4	11	0	2	2	7	4	5
2021-03-02	jilin	107	116	-9	lose	29	56	27	0.518	10	28	18	0.357	19	24	5	0.792	4	12	8	0.333	32	69	37	0.464	11	23	0.657	0.256	20	4	10	3	20	21	7	14	5	15	4	11	6	14	3	3	0	1	3	7
2021-03-02	beikong	83	93	-10	lose	22	43	21	0.512	8	17	9	0.471	15	28	13	0.536	6	17	11	0.353	24	43	19	0.558	5	26	0.619	0.156	17	6	18	5	25	27	4	8	5	7	8	14	12	23	2	4	0	0	3	7
2021-03-02	beijing	93	83	10	win	23	52	29	0.442	10	29	19	0.345	17	24	7	0.708	9	23	14	0.391	22	56	34	0.393	16	27	0.844	0.381	16	10	14	2	27	25	4	9	5	13	1	6	3	10	3	9	1	2	1	2
2022-03-02	sichuan	57	106	-49	lose	20	50	30	0.4	2	20	18	0.1	11	19	8	0.579	3	8	5	0.375	18	61	43	0.295	5	21	0.618	0.1	11	8	16	4	19	20	3	8	2	12	2	6	7	14	2	4	0	2	3	7
2022-03-02	shenzhen	101	89	12	win	24	49	25	0.49	14	29	15	0.483	11	14	3	0.786	2	6	4	0.333	32	68	36	0.471	11	38	0.745	0.314	24	5	19	6	24	16	6	11	5	10	4	8	7	11	1	3	1	3	3	5
2022-03-02	ningbo	109	106	3	win	31	71	40	0.437	11	29	18	0.379	14	18	4	0.778	1	6	5	0.167	37	90	53	0.411	20	32	0.727	0.385	27	6	10	7	29	19	6	16	7	20	0	3	1	3	3	5	5	14	1	2
2022-03-02	jilin	99	82	17	win	32	49	17	0.653	8	27	19	0.296	11	14	3	0.786	2	6	4	0.333	38	70	32	0.543	5	32	0.744	0.172	28	10	13	5	22	17	8	12	7	18	4	5	13	19	0	3	0	3	9	13
2022-03-02	jiangsu	82	99	-17	lose	18	42	24	0.429	11	32	21	0.344	13	21	8	0.619	4	10	6	0.4	23	62	39	0.371	11	24	0.828	0.256	26	8	19	2	17	22	3	6	7	15	5	10	8	16	3	9	0	2	1	1
2022-03-02	guangsha	106	57	49	win	36	57	21	0.632	8	25	17	0.32	10	15	5	0.667	1	5	4	0.2	40	74	34	0.541	13	45	0.9	0.382	29	8	16	3	20	19	9	12	9	17	0	2	3	9	2	7	4	9	1	2
2022-03-02	fujian	106	109	-3	lose	22	49	27	0.449	10	31	21	0.323	32	38	6	0.842	1	4	3	0.25	29	74	45	0.392	12	32	0.615	0.273	22	4	12	2	19	29	7	14	4	15	3	7	7	12	3	6	1	1	2	5
2022-03-02	beikong	89	101	-12	lose	21	58	37	0.362	8	19	11	0.421	23	32	9	0.719	4	10	6	0.4	21	63	42	0.333	13	24	0.686	0.255	18	12	13	7	16	24	4	7	5	12	2	8	3	9	0	2	5	11	3	4
2019-03-03	jilin	111	132	-21	lose	35	66	31	0.53	7	25	18	0.28	20	27	7	0.741	4	11	7	0.364	34	76	42	0.447	11	25	0.61	0.268	20	6	10	2	30	24	3	11	6	19	5	9	7	13	2	4	3	10	8	13
2019-03-03	guangdong	132	111	21	win	45	69	24	0.652	4	16	12	0.25	30	40	10	0.75	3	13	10	0.231	42	68	26	0.618	16	30	0.732	0.39	32	6	11	8	24	30	13	15	3	12	6	11	9	16	0	1	1	3	5	12
2021-03-03	shanghai	112	97	15	win	31	52	21	0.596	11	33	22	0.333	17	22	5	0.773	5	14	9	0.357	35	69	34	0.507	12	34	0.739	0.3	18	7	11	5	25	30	8	10	4	15	1	5	7	14	1	5	2	5	4	4
2021-03-03	qingdao	122	135	-13	lose	32	59	27	0.542	13	31	18	0.419	19	34	15	0.559	10	25	15	0.4	32	62	30	0.516	13	29	0.707	0.26	25	6	17	3	35	26	11	19	6	13	5	11	7	18	0	1	5	6	2	3
2021-03-03	liaoning	94	114	-20	lose	19	48	29	0.396	9	34	25	0.265	29	35	6	0.829	5	15	10	0.333	18	62	44	0.29	16	22	0.595	0.308	15	8	13	3	25	34	4	8	3	16	2	8	3	15	1	5	3	6	1	4
2021-03-03	jiangsu	97	112	-15	lose	29	56	27	0.518	10	28	18	0.357	9	16	7	0.563	6	14	8	0.429	29	66	37	0.439	12	28	0.7	0.261	19	5	14	3	30	25	3	8	1	6	1	2	9	18	3	5	2	5	1	4
2021-03-03	guangzhou	124	118	6	win	38	62	24	0.613	11	26	15	0.423	15	26	11	0.577	11	26	15	0.423	34	58	24	0.586	13	24	0.706	0.371	17	14	18	2	25	24	6	9	8	15	2	5	8	11	2	2	4	7	0	0
2021-03-03	guangsha	114	94	20	win	33	55	22	0.6	9	25	16	0.36	21	29	8	0.724	6	8	2	0.75	32	68	36	0.471	15	36	0.692	0.405	22	12	16	5	34	25	9	12	4	15	4	5	10	15	3	5	2	5	0	3
2021-03-03	guangdong	135	122	13	win	34	59	25	0.576	11	31	20	0.355	34	45	11	0.756	7	25	18	0.28	35	62	27	0.565	12	37	0.74	0.293	21	7	11	4	26	35	14	23	5	11	3	5	7	14	1	3	2	5	1	2
2021-03-03	fujian	118	124	-6	lose	31	49	18	0.633	11	33	22	0.333	23	27	4	0.852	9	22	13	0.409	29	56	27	0.518	10	22	0.629	0.294	22	6	20	3	24	25	13	21	8	17	3	6	5	8	1	4	2	2	1	3
2022-03-03	zhejiang	124	92	32	win	29	56	27	0.518	17	33	16	0.515	15	19	4	0.789	9	13	4	0.692	36	75	39	0.48	16	32	0.762	0.372	33	11	14	3	19	18	13	22	7	15	2	6	6	10	7	11	1	1	1	2
2022-03-03	xinjiang	109	107	2	win	22	55	33	0.4	10	28	18	0.357	35	42	7	0.833	2	7	5	0.286	30	76	46	0.395	18	21	0.618	0.4	31	12	16	7	27	31	4	12	7	12	2	11	1	4	2	6	3	7	2	3
2022-03-03	tianjin	117	114	3	win	26	48	22	0.542	16	37	21	0.432	17	20	3	0.85	4	8	4	0.5	35	74	39	0.473	8	27	0.711	0.195	35	8	11	2	24	21	6	10	5	18	2	7	4	11	6	9	1	2	4	6
2022-03-03	shanxi	105	110	-5	lose	25	51	26	0.49	10	35	25	0.286	25	33	8	0.758	7	21	14	0.333	27	64	37	0.422	19	28	0.718	0.413	27	7	20	3	27	31	4	9	7	21	1	4	2	6	1	2	2	3	0	3
2022-03-03	shanghai	102	100	2	win	25	61	36	0.41	11	25	14	0.44	19	31	12	0.613	5	11	6	0.455	28	72	44	0.389	11	32	0.681	0.239	21	8	16	9	26	26	9	16	6	14	1	6	6	12	3	7	1	11	4	7
2022-03-03	shandong	114	117	-3	lose	31	51	20	0.608	12	33	21	0.364	16	22	6	0.727	1	4	3	0.25	38	76	38	0.5	11	33	0.805	0.289	31	5	11	4	21	24	6	10	9	14	2	7	8	14	1	6	3	6	1	3
2022-03-03	qingdao	110	105	5	win	27	50	23	0.54	12	29	17	0.414	20	32	12	0.625	7	15	8	0.467	30	62	32	0.484	11	27	0.587	0.282	25	11	19	4	31	27	6	13	7	17	5	6	9	14	2	4	1	2	2	4
2022-03-03	nanjing	92	124	-32	lose	28	57	29	0.491	9	25	16	0.36	9	15	6	0.6	7	13	6	0.538	29	68	39	0.426	10	27	0.628	0.238	22	7	16	2	18	19	6	10	6	15	4	12	4	12	4	7	4	6	1	2
2022-03-03	liaoning	100	102	-2	lose	32	65	33	0.492	4	24	20	0.167	24	29	5	0.828	3	7	4	0.429	32	81	49	0.395	15	35	0.761	0.319	14	11	17	3	26	26	8	15	1	9	1	4	6	12	1	4	1	5	6	12
2022-03-03	guangzhou	74	108	-34	lose	22	44	22	0.5	7	28	21	0.25	9	14	5	0.643	3	11	8	0.273	25	60	35	0.417	9	22	0.564	0.214	17	7	14	5	19	18	2	8	5	13	2	7	8	15	2	4	4	8	3	8
2022-03-03	guangdong	107	109	-2	lose	35	62	27	0.565	7	19	12	0.368	16	23	7	0.696	1	2	1	0.5	40	78	38	0.513	13	27	0.6	0.382	29	8	20	2	31	27	9	14	5	9	1	4	5	12	3	6	2	8	1	4
2022-03-03	beijing	108	74	34	win	30	50	20	0.6	13	36	23	0.361	9	13	4	0.692	6	19	13	0.316	37	67	30	0.552	17	33	0.786	0.436	32	7	10	6	18	19	5	12	13	32	1	5	2	7	2	2	2	2	1	2
2021-03-04	zhejiang	112	107	5	win	33	58	25	0.569	6	28	22	0.214	28	33	5	0.848	4	11	7	0.364	30	70	40	0.429	16	33	0.75	0.421	16	4	13	5	29	27	7	11	4	15	4	13	11	21	0	5	0	1	1	2
2021-03-04	tianjin	95	126	-31	lose	15	38	23	0.395	16	40	24	0.4	17	22	5	0.773	10	24	14	0.417	20	53	33	0.377	9	25	0.694	0.191	21	7	16	5	18	17	2	9	9	17	2	4	4	7	2	5	1	5	2	2
2021-03-04	sichuan	114	106	8	win	33	63	30	0.524	11	20	9	0.55	15	21	6	0.714	4	8	4	0.5	35	70	35	0.5	14	38	0.704	0.368	26	7	18	3	23	24	15	20	7	11	0	0	3	9	2	4	4	11	3	4
2021-03-04	shenzhen	126	95	31	win	32	52	20	0.615	15	33	18	0.455	17	19	2	0.895	8	18	10	0.444	36	64	28	0.563	11	38	0.809	0.306	22	8	12	6	17	18	9	16	6	15	6	10	7	12	2	3	6	6	3	3
2021-03-04	shanxi	95	89	6	win	16	46	30	0.348	12	29	17	0.414	27	35	8	0.771	5	18	13	0.278	22	56	34	0.393	16	27	0.675	0.39	20	8	15	4	24	26	3	8	8	15	2	5	4	13	5	8	2	5	0	1
2021-03-04	shandong	106	114	-8	lose	22	46	24	0.478	14	43	29	0.326	20	30	10	0.667	8	27	19	0.296	25	59	34	0.424	16	24	0.632	0.296	22	9	11	9	24	23	6	20	9	23	3	10	4	8	4	4	1	5	0	1
2021-03-04	nanjing	88	126	-38	lose	13	34	21	0.382	14	38	24	0.368	20	31	11	0.645	2	10	8	0.2	25	62	37	0.403	10	20	0.8	0.256	19	9	17	1	28	28	5	7	10	27	0	4	5	8	2	4	1	4	2	7
2021-03-04	jilin	107	112	-5	lose	26	60	34	0.433	8	20	12	0.4	31	39	8	0.795	6	11	5	0.545	23	64	41	0.359	11	22	0.579	0.25	16	8	8	6	27	29	9	16	3	7	1	5	6	17	2	7	1	4	1	4
2021-03-04	beikong	89	95	-6	lose	31	65	34	0.477	4	22	18	0.182	15	19	4	0.789	9	27	18	0.333	23	57	34	0.404	13	25	0.61	0.325	19	5	16	9	26	24	5	8	1	11	5	11	4	15	3	9	5	7	0	1
2021-03-04	beijing	126	88	38	win	21	32	11	0.656	18	35	17	0.514	30	33	3	0.909	7	10	3	0.7	27	52	25	0.519	5	29	0.744	0.2	27	11	16	5	28	28	5	7	12	21	4	5	5	11	2	4	1	4	1	2
2022-03-04	sichuan	91	104	-13	lose	26	47	21	0.553	10	28	18	0.357	9	9	0	1	9	16	7	0.563	27	59	32	0.458	11	29	0.784	0.333	23	5	18	2	19	13	4	10	7	14	4	8	7	12	4	8	1	6	3	6
2022-03-04	shenzhen	103	81	22	win	23	49	26	0.469	10	27	17	0.37	27	32	5	0.844	2	4	2	0.5	29	70	41	0.414	16	40	0.833	0.39	23	7	15	5	18	25	2	6	7	17	4	8	6	10	1	3	3	7	2	5
2022-03-04	ningbo	81	103	-22	lose	25	54	29	0.463	8	28	20	0.286	7	10	3	0.7	1	5	4	0.2	30	75	45	0.4	8	25	0.61	0.167	22	7	13	2	25	18	3	5	5	16	5	7	9	13	4	8	1	5	0	3
2022-03-04	jilin	104	91	13	win	31	47	16	0.66	9	32	23	0.281	15	18	3	0.833	2	5	3	0.4	36	72	36	0.5	8	22	0.667	0.216	25	9	8	5	13	19	7	12	5	18	3	10	9	14	2	3	1	2	4	8
2022-03-04	jiangsu	88	110	-22	lose	24	46	22	0.522	8	24	16	0.333	16	19	3	0.842	3	5	2	0.6	28	64	36	0.438	4	12	0.571	0.129	16	8	16	1	42	23	5	9	4	11	1	5	7	13	2	5	2	2	3	8
2022-03-04	guangsha	110	88	22	win	23	35	12	0.657	9	23	14	0.391	37	47	10	0.787	0	3	3	0	29	52	23	0.558	9	27	0.871	0.429	24	7	20	4	23	42	5	6	7	14	2	5	5	5	3	9	3	8	0	2
2022-03-04	fujian	79	112	-33	lose	19	51	32	0.373	8	38	30	0.211	17	24	7	0.708	1	13	12	0.077	22	72	50	0.306	12	33	0.733	0.194	16	5	13	9	17	24	8	17	3	23	4	11	3	11	1	1	0	1	2	9
2022-03-04	beikong	112	79	33	win	37	73	36	0.507	8	23	15	0.348	14	16	2	0.875	7	16	9	0.438	34	76	42	0.447	12	50	0.806	0.267	34	7	9	7	24	17	13	23	5	15	8	12	7	12	1	4	1	7	1	3
2019-03-05	zhejiang	111	124	-13	lose	32	52	20	0.615	8	41	33	0.195	23	27	4	0.852	3	12	9	0.25	32	76	44	0.421	17	22	0.815	0.327	21	10	12	1	18	25	6	14	6	20	3	9	12	20	3	8	0	1	3	7
2019-03-05	xinjiang	134	125	9	win	36	61	25	0.59	14	37	23	0.378	20	29	9	0.69	15	39	24	0.385	33	57	24	0.579	16	33	0.825	0.356	30	6	8	4	20	24	11	24	6	18	3	5	7	13	7	7	0	1	0	4
2019-03-05	shenzhen	124	111	13	win	36	49	13	0.735	13	28	15	0.464	13	19	6	0.684	3	8	5	0.375	42	65	23	0.646	5	35	0.673	0.185	34	9	19	6	25	18	12	15	9	18	2	7	7	14	2	4	2	2	4	6
2019-03-05	shanxi	125	134	-9	lose	31	59	28	0.525	14	31	17	0.452	21	23	2	0.913	22	44	22	0.5	20	43	23	0.465	7	29	0.644	0.175	18	3	7	4	24	20	9	13	6	14	4	7	11	22	5	8	0	1	2	7
2019-03-05	shanghai	114	105	9	win	29	50	21	0.58	10	26	16	0.385	26	31	5	0.839	4	10	6	0.4	31	62	31	0.5	7	32	0.727	0.2	24	11	14	3	21	29	8	13	10	19	2	9	9	24	0	1	1	1	4	11
2019-03-05	shandong	125	129	-4	lose	38	62	24	0.613	7	22	15	0.318	28	48	20	0.583	7	12	5	0.583	33	67	34	0.493	12	25	0.658	0.245	20	14	14	4	29	33	17	26	9	20	2	7	9	20	2	3	3	8	2	5
2019-03-05	qingdao	129	125	4	win	36	59	23	0.61	11	28	17	0.393	24	34	10	0.706	7	13	6	0.538	38	72	34	0.528	13	37	0.755	0.342	16	7	19	3	33	29	13	19	11	22	8	15	13	30	0	1	3	4	4	6
2019-03-05	liaoning	113	120	-7	lose	33	59	26	0.559	6	31	25	0.194	29	36	7	0.806	3	17	14	0.176	30	67	37	0.448	11	27	0.574	0.216	14	16	10	2	22	24	13	21	2	11	6	10	15	24	1	6	1	4	0	6
2019-03-05	jilin	120	113	7	win	30	61	31	0.492	13	31	18	0.419	21	30	9	0.7	7	16	9	0.438	34	74	40	0.459	20	40	0.784	0.426	26	5	21	1	24	22	11	19	5	19	1	4	6	14	2	3	2	3	2	4
2019-03-05	guangzhou	105	114	-9	lose	33	59	26	0.559	8	24	16	0.333	15	22	7	0.682	4	10	6	0.4	33	69	36	0.478	12	28	0.8	0.273	18	7	16	3	29	21	15	18	3	9	3	6	7	19	0	2	0	1	7	15
2019-03-05	guangsha	108	114	-6	lose	25	53	28	0.472	12	40	28	0.3	22	33	11	0.667	4	14	10	0.286	29	75	46	0.387	14	31	0.62	0.259	25	11	13	2	29	27	9	11	7	24	2	4	5	13	1	5	4	12	2	3
2019-03-05	guangdong	114	108	6	win	32	66	34	0.485	9	24	15	0.375	23	32	9	0.719	7	20	13	0.35	29	65	36	0.446	19	40	0.741	0.38	27	6	15	7	27	29	6	10	8	24	7	12	9	19	1	1	5	13	1	3
2019-03-05	fujian	106	108	-2	lose	26	45	19	0.578	11	22	11	0.5	21	23	2	0.913	2	6	4	0.333	32	58	26	0.552	7	25	0.833	0.28	14	5	16	2	21	26	3	4	4	11	7	13	15	25	0	2	5	6	7	13
2019-03-05	beijing	108	106	2	win	26	40	14	0.65	14	37	23	0.378	14	16	2	0.875	14	29	15	0.483	24	46	22	0.522	5	18	0.72	0.167	22	7	9	3	26	21	1	1	9	24	2	4	9	14	5	7	1	1	4	8
2021-03-05	qingdao	117	97	20	win	34	64	30	0.531	10	29	19	0.345	19	23	4	0.826	7	19	12	0.368	34	71	37	0.479	14	37	0.725	0.326	24	6	14	6	17	22	10	15	9	23	2	7	5	10	1	3	4	6	1	4
2021-03-05	jiangsu	97	106	-9	lose	23	38	15	0.605	12	31	19	0.387	15	19	4	0.789	11	29	18	0.379	21	37	16	0.568	8	28	0.651	0.242	21	7	25	4	24	22	5	6	7	12	2	4	8	9	5	9	3	6	2	4
2021-03-05	guangdong	106	97	9	win	29	56	27	0.518	10	30	20	0.333	18	22	4	0.818	12	33	21	0.364	25	51	26	0.49	15	25	0.758	0.349	14	11	14	1	22	24	6	11	5	12	3	9	10	18	1	5	5	9	2	3
2021-03-05	fujian	97	117	-20	lose	36	71	35	0.507	6	22	16	0.273	7	9	2	0.778	7	15	8	0.467	32	75	43	0.427	14	29	0.674	0.275	16	5	16	3	22	17	3	5	4	16	3	11	6	12	3	5	4	6	3	5
2022-03-05	zhejiang	97	96	1	win	27	52	25	0.519	8	27	19	0.296	19	24	5	0.792	2	5	3	0.4	32	73	41	0.438	11	34	0.791	0.244	17	9	16	4	22	24	8	13	3	12	2	4	6	14	2	7	0	1	1	2
2022-03-05	xinjiang	102	120	-18	lose	35	59	24	0.593	3	28	25	0.107	23	27	4	0.852	1	6	5	0.167	35	79	44	0.443	9	26	0.788	0.196	30	9	9	2	13	21	10	18	4	21	2	5	2	7	1	4	7	10	1	4
2022-03-05	tianjin	120	102	18	win	24	40	16	0.6	21	39	18	0.538	9	11	2	0.818	5	7	2	0.714	39	71	32	0.549	7	37	0.804	0.212	28	6	19	2	21	13	7	10	9	15	2	5	8	15	0	2	1	3	6	14
2022-03-05	shanxi	98	85	13	win	26	57	31	0.456	11	31	20	0.355	13	17	4	0.765	4	9	5	0.444	32	78	46	0.41	15	28	0.8	0.341	17	13	16	2	11	16	7	13	6	17	3	10	6	10	0	2	1	3	4	8
2022-03-05	qingdao	85	98	-13	lose	29	54	25	0.537	6	23	17	0.261	9	13	4	0.692	1	6	5	0.167	34	71	37	0.479	7	29	0.659	0.2	14	9	19	3	16	11	9	14	5	16	2	5	7	12	0	2	0	2	2	6
2022-03-05	liaoning	96	97	-1	lose	30	62	32	0.484	6	21	15	0.286	18	21	3	0.857	2	6	4	0.333	31	74	43	0.419	9	34	0.756	0.209	19	9	13	4	24	22	5	10	2	4	1	6	11	20	4	5	0	4	3	3
2022-03-05	guangzhou	89	98	-9	lose	22	45	23	0.489	11	30	19	0.367	12	15	3	0.8	3	8	5	0.375	25	62	37	0.403	7	31	0.775	0.175	12	7	18	3	23	21	5	9	1	10	8	18	5	12	2	3	1	3	6	11
2022-03-05	guangdong	98	89	9	win	22	45	23	0.489	12	31	19	0.387	18	22	4	0.818	6	14	8	0.429	26	60	34	0.433	9	33	0.825	0.225	22	6	16	1	21	23	8	10	8	19	0	4	4	12	0	2	1	4	2	3
2019-03-06	tianjin	121	102	19	win	28	43	15	0.651	16	34	18	0.471	17	21	4	0.81	11	26	15	0.423	31	49	18	0.633	6	31	0.756	0.182	15	5	9	2	22	22	3	6	7	16	3	7	10	14	1	4	2	4	13	16
2019-03-06	sichuan	122	117	5	win	36	56	20	0.643	10	35	25	0.286	20	30	10	0.667	16	49	33	0.327	28	40	12	0.7	12	38	0.826	0.293	15	8	9	1	28	22	5	9	6	26	4	6	13	20	0	0	3	3	4	7
2019-03-06	ningbo	102	121	-19	lose	24	51	27	0.471	8	26	18	0.308	30	36	6	0.833	12	32	20	0.375	19	44	25	0.432	10	27	0.818	0.244	15	4	10	0	22	22	4	6	8	24	3	10	7	14	2	5	1	6	0	1
2019-03-06	nanjing	100	103	-3	lose	28	53	25	0.528	8	24	16	0.333	20	26	6	0.769	9	20	11	0.45	25	55	30	0.455	11	32	0.8	0.275	17	4	11	4	23	24	9	11	1	5	5	14	13	33	1	5	1	3	8	15
2019-03-06	jiangsu	103	100	3	win	24	47	23	0.511	12	30	18	0.4	19	29	10	0.655	10	30	20	0.333	24	45	21	0.533	8	29	0.725	0.2	22	6	9	2	24	23	5	13	6	11	4	11	6	14	3	8	4	8	1	4
2019-03-06	beikong	117	122	-5	lose	30	55	25	0.545	10	34	24	0.294	27	32	5	0.844	12	47	35	0.255	24	38	14	0.632	8	29	0.707	0.174	17	4	9	1	22	28	5	11	4	16	2	3	13	30	0	1	1	2	8	18
2021-03-06	xinjiang	66	82	-16	lose	21	42	21	0.5	5	24	19	0.208	9	15	6	0.6	6	16	10	0.375	19	49	30	0.388	8	29	0.725	0.211	11	12	23	1	20	18	3	13	2	8	1	5	3	6	2	5	4	11	0	0
2021-03-06	shenzhen	108	96	12	win	27	46	19	0.587	10	30	20	0.333	24	33	9	0.727	8	21	13	0.381	26	52	26	0.5	10	37	0.755	0.263	22	9	19	8	25	25	9	13	5	16	4	7	5	7	1	2	2	5	1	4
2021-03-06	shandong	105	104	1	win	25	52	27	0.481	11	27	16	0.407	22	27	5	0.815	2	9	7	0.222	31	67	36	0.463	13	29	0.744	0.342	22	11	16	1	26	24	5	11	5	13	3	7	8	17	5	8	2	4	0	0
2021-03-06	jilin	96	108	-12	lose	22	45	23	0.489	11	39	28	0.282	19	30	11	0.633	4	20	16	0.2	27	62	35	0.435	12	28	0.737	0.245	18	12	16	4	25	25	3	8	5	16	4	5	7	12	4	10	1	4	2	7
2021-03-06	guangsha	104	105	-1	lose	30	54	24	0.556	10	28	18	0.357	14	21	7	0.667	9	15	6	0.6	30	66	36	0.455	10	25	0.658	0.256	22	8	13	5	24	26	10	14	7	21	2	9	6	17	2	3	2	2	1	2
2021-03-06	beijing	82	66	16	win	27	46	19	0.587	4	29	25	0.138	16	23	7	0.696	4	23	19	0.174	26	51	25	0.51	11	30	0.789	0.275	13	12	14	3	18	20	5	8	3	19	6	10	8	12	1	5	0	1	0	1
2022-03-06	sichuan	80	110	-30	lose	18	40	22	0.45	9	26	17	0.346	17	21	4	0.81	6	11	5	0.545	19	53	34	0.358	4	15	0.517	0.121	25	7	15	1	23	22	1	5	6	12	3	8	5	9	2	6	2	6	1	3
2022-03-06	shenzhen	118	115	3	win	32	56	24	0.571	11	29	18	0.379	21	27	6	0.778	8	16	8	0.5	28	62	34	0.452	16	30	0.612	0.4	26	7	15	3	23	28	5	13	5	11	6	9	13	20	4	9	3	6	3	6
2022-03-06	shanghai	108	118	-10	lose	24	52	28	0.462	13	39	26	0.333	21	26	5	0.808	6	16	10	0.375	29	73	44	0.397	16	33	0.868	0.32	28	11	20	5	27	23	16	30	5	16	2	5	1	9	0	3	3	8	0	1
2022-03-06	shandong	115	118	-3	lose	23	50	27	0.46	17	42	25	0.405	18	24	6	0.75	4	9	5	0.444	34	81	47	0.42	19	24	0.6	0.388	22	8	13	4	28	23	7	9	9	18	4	9	3	15	3	6	3	7	2	5
2022-03-06	ningbo	111	117	-6	lose	31	55	24	0.564	11	28	17	0.393	16	19	3	0.842	10	24	14	0.417	31	58	27	0.534	20	29	0.725	0.488	28	7	19	2	29	16	4	7	7	14	4	6	6	12	0	3	6	10	1	6
2022-03-06	nanjing	95	80	15	win	35	56	21	0.625	3	23	20	0.13	16	19	3	0.842	1	7	6	0.143	36	71	35	0.507	16	33	0.733	0.485	27	9	14	3	24	22	8	11	4	13	1	7	1	3	0	2	0	1	2	8
2022-03-06	jilin	118	108	10	win	29	51	22	0.569	14	31	17	0.452	18	26	8	0.692	5	7	2	0.714	35	72	37	0.486	5	34	0.68	0.132	23	15	20	5	23	27	7	13	9	17	1	1	9	13	1	1	1	2	12	22
2022-03-06	jiangsu	80	95	-15	lose	17	46	29	0.37	10	25	15	0.4	16	20	4	0.8	7	20	13	0.35	16	47	31	0.34	12	17	0.515	0.267	12	7	15	3	22	24	5	7	3	12	3	7	1	10	2	6	1	4	0	1
2022-03-06	guangsha	110	80	30	win	26	42	16	0.619	13	31	18	0.419	19	21	2	0.905	6	15	9	0.4	30	55	25	0.545	14	29	0.879	0.483	35	8	14	6	22	23	2	6	7	14	3	5	4	7	3	6	7	11	1	5
2022-03-06	fujian	117	111	6	win	35	58	23	0.603	10	24	14	0.417	17	24	7	0.708	8	19	11	0.421	29	55	26	0.527	11	21	0.512	0.275	25	13	14	2	16	29	12	17	5	9	2	8	9	16	1	5	1	2	5	10
2022-03-06	beikong	79	83	-4	lose	21	50	29	0.42	4	14	10	0.286	25	33	8	0.758	0	3	3	0	20	56	36	0.357	9	28	0.757	0.281	12	6	23	4	25	28	1	3	1	8	4	12	7	15	3	4	4	8	7	12
2022-03-06	beijing	83	79	4	win	21	49	28	0.429	10	26	16	0.385	11	16	5	0.688	4	6	2	0.667	26	68	42	0.382	9	23	0.719	0.243	16	9	14	1	28	25	0	3	8	20	3	8	10	15	1	8	0	3	3	3
2019-03-07	zhejiang	91	113	-22	lose	18	47	29	0.383	14	39	25	0.359	13	25	12	0.52	5	10	5	0.5	26	75	49	0.347	13	26	0.542	0.265	13	10	21	5	21	25	11	19	3	13	2	7	4	14	2	2	0	3	1	4
2019-03-07	shenzhen	98	89	9	win	31	57	26	0.544	9	25	16	0.36	9	18	9	0.5	5	17	12	0.294	33	63	30	0.524	17	31	0.738	0.415	18	6	16	3	21	23	9	14	10	14	5	7	7	14	0	3	1	3	0	3
2019-03-07	shanxi	128	137	-9	lose	29	56	27	0.518	16	37	21	0.432	22	23	1	0.957	18	38	20	0.474	24	52	28	0.462	13	24	0.558	0.333	26	4	10	3	24	18	6	10	15	30	7	10	9	18	2	5	3	10	4	10
2019-03-07	shanghai	89	98	-9	lose	25	55	30	0.455	6	24	18	0.25	21	25	4	0.84	1	9	8	0.111	25	65	40	0.385	11	24	0.585	0.262	12	10	14	3	23	21	6	13	4	14	2	7	9	20	2	3	2	4	2	3
2019-03-07	shandong	137	128	9	win	44	68	24	0.647	10	29	19	0.345	19	25	6	0.76	13	33	20	0.394	38	61	23	0.623	19	26	0.667	0.442	28	3	11	2	18	24	6	13	6	17	6	9	13	19	2	5	10	18	5	5
2019-03-07	qingdao	117	101	16	win	36	57	21	0.632	9	24	15	0.375	18	21	3	0.857	11	23	12	0.478	31	55	24	0.564	11	33	0.702	0.314	15	6	15	2	18	25	13	19	9	17	2	9	10	22	1	2	3	5	2	8
2019-03-07	liaoning	101	117	-16	lose	31	58	27	0.534	7	32	25	0.219	18	20	2	0.9	9	39	30	0.231	27	49	22	0.551	14	24	0.686	0.298	15	12	13	2	25	18	6	14	5	18	3	7	8	17	2	9	1	4	3	6
2019-03-07	jilin	123	96	27	win	32	46	14	0.696	11	27	16	0.407	26	33	7	0.788	12	19	7	0.632	28	51	23	0.549	5	32	0.8	0.167	28	5	11	2	21	23	6	8	14	24	5	8	10	15	2	2	2	2	2	5
2019-03-07	guangzhou	106	117	-11	lose	30	57	27	0.526	10	28	18	0.357	16	17	1	0.941	14	38	24	0.368	23	44	21	0.523	9	22	0.667	0.231	20	9	9	3	22	19	18	25	5	16	4	8	7	15	1	7	0	1	1	3
2019-03-07	guangsha	117	106	11	win	23	39	16	0.59	16	35	19	0.457	23	26	3	0.885	17	30	13	0.567	19	41	22	0.463	11	30	0.769	0.333	25	7	16	3	19	22	9	11	11	26	1	3	6	11	4	7	3	6	0	1
2019-03-07	guangdong	113	91	22	win	40	72	32	0.556	8	27	19	0.296	9	16	7	0.563	6	12	6	0.5	40	85	45	0.471	22	36	0.735	0.458	26	12	19	8	25	21	13	25	7	19	4	6	4	13	2	2	1	3	0	2
2019-03-07	beijing	96	123	-27	lose	29	46	17	0.63	6	34	28	0.176	20	21	1	0.952	6	24	18	0.25	24	51	27	0.471	8	25	0.833	0.2	17	4	11	3	23	21	2	5	3	21	2	6	12	19	4	5	2	2	1	2
2021-03-07	zhejiang	100	93	7	win	22	56	34	0.393	9	27	18	0.333	29	49	20	0.592	7	18	11	0.389	19	60	41	0.317	16	38	0.809	0.314	17	11	18	1	23	35	6	19	3	10	3	5	7	14	1	7	1	2	0	1
2021-03-07	tianjin	103	98	5	win	23	42	19	0.548	14	33	19	0.424	15	21	6	0.714	13	27	14	0.481	22	46	24	0.478	9	25	0.694	0.25	30	11	17	3	23	20	4	8	12	25	4	11	6	12	3	6	1	3	1	1
2021-03-07	shanxi	98	103	-5	lose	18	38	20	0.474	12	31	19	0.387	26	31	5	0.839	7	18	11	0.389	20	48	28	0.417	11	27	0.75	0.306	19	12	19	0	20	23	5	8	9	16	1	7	3	7	2	7	2	9	2	5
2021-03-07	beikong	93	100	-7	lose	35	67	32	0.522	2	17	15	0.118	17	28	11	0.607	4	17	13	0.235	30	64	34	0.469	9	35	0.686	0.191	26	12	17	9	35	23	11	16	1	4	0	3	6	11	2	8	8	18	3	4
2022-03-07	tianjin	113	98	15	win	22	38	16	0.579	17	52	35	0.327	18	19	1	0.947	5	13	8	0.385	31	74	43	0.419	17	33	0.733	0.37	26	8	11	9	25	21	6	9	9	32	3	6	3	6	3	4	2	5	4	12
2022-03-07	qingdao	101	111	-10	lose	28	58	30	0.483	9	22	13	0.409	18	21	3	0.857	3	10	7	0.3	29	65	36	0.446	11	27	0.711	0.289	17	8	18	6	28	23	9	16	5	12	2	5	8	17	2	3	2	4	4	5
2022-03-07	liaoning	111	101	10	win	26	52	26	0.5	10	25	15	0.4	29	36	7	0.806	8	14	6	0.571	24	59	35	0.407	11	27	0.711	0.289	19	14	12	3	23	28	9	13	5	12	5	9	4	10	0	4	1	2	0	1
2022-03-07	guangzhou	98	113	-15	lose	30	53	23	0.566	5	31	26	0.161	23	27	4	0.852	1	5	4	0.2	30	75	45	0.4	12	29	0.63	0.267	19	5	13	1	21	25	2	5	2	17	4	9	9	13	3	5	3	5	4	8
2021-03-08	sichuan	98	90	8	win	32	56	24	0.571	7	27	20	0.259	13	19	6	0.684	2	9	7	0.222	35	72	37	0.486	9	38	0.776	0.214	27	12	17	9	25	24	9	17	7	16	0	0	4	9	1	2	5	7	1	4
2021-03-08	shanghai	95	96	-1	lose	24	45	21	0.533	7	31	24	0.226	26	29	3	0.897	4	16	12	0.25	23	56	33	0.411	10	28	0.737	0.217	10	7	10	1	22	25	8	14	4	11	4	6	9	18	3	6	0	1	0	2
2021-03-08	shandong	115	107	8	win	33	63	30	0.524	10	29	19	0.345	19	27	8	0.704	9	24	15	0.375	27	61	34	0.443	16	26	0.65	0.381	22	10	10	4	20	25	11	18	3	12	1	9	3	13	1	4	1	5	1	1
2021-03-08	qingdao	90	98	-8	lose	26	55	29	0.473	5	25	20	0.2	23	31	8	0.742	3	6	3	0.5	25	71	46	0.352	11	33	0.786	0.224	18	9	17	3	24	25	11	23	2	9	2	9	4	14	0	0	5	7	1	4
2021-03-08	jiangsu	116	112	4	win	28	43	15	0.651	12	26	14	0.462	24	30	6	0.8	6	15	9	0.4	30	50	20	0.6	8	31	0.608	0.276	24	4	19	9	24	28	8	8	7	16	1	4	7	10	1	4	3	4	2	2
2021-03-08	guangzhou	96	95	1	win	23	46	23	0.5	13	32	19	0.406	11	14	3	0.786	8	16	8	0.5	27	61	34	0.443	10	36	0.783	0.263	11	4	16	6	25	22	3	7	5	15	0	1	7	11	2	3	2	4	5	6
2021-03-08	guangsha	112	116	-4	lose	34	72	38	0.472	7	23	16	0.304	23	28	5	0.821	3	17	14	0.176	34	74	40	0.459	20	21	0.724	0.392	16	11	10	0	28	24	7	10	4	16	0	4	5	11	2	3	1	6	2	4
2021-03-08	fujian	107	115	-8	lose	29	57	28	0.509	13	31	18	0.419	10	12	2	0.833	14	34	20	0.412	26	52	26	0.5	14	26	0.619	0.35	30	5	14	4	25	20	3	7	10	16	2	7	5	12	3	8	2	8	1	4
2022-03-08	zhejiang	95	107	-12	lose	28	58	30	0.483	7	24	17	0.292	18	23	5	0.783	5	11	6	0.455	27	68	41	0.397	12	23	0.719	0.261	25	7	8	1	20	24	7	11	3	12	4	5	5	15	2	7	0	1	2	3
2022-03-08	xinjiang	145	116	29	win	48	75	27	0.64	8	20	12	0.4	25	30	5	0.833	5	6	1	0.833	45	83	38	0.542	14	41	0.854	0.389	50	6	11	4	23	24	18	25	6	15	2	8	4	10	5	7	13	17	0	2
2022-03-08	sichuan	86	101	-15	lose	23	43	20	0.535	10	31	21	0.323	10	13	3	0.769	6	17	11	0.353	26	56	30	0.464	15	30	0.789	0.395	31	4	22	3	15	12	6	13	6	15	0	4	4	8	2	5	1	8	0	1
2022-03-08	shenzhen	121	94	27	win	35	58	23	0.603	9	31	22	0.29	24	30	6	0.8	3	11	8	0.273	35	72	37	0.486	15	36	0.706	0.366	25	5	10	5	18	25	6	14	4	12	3	7	7	15	2	7	5	10	6	9
2022-03-08	shanghai	131	91	40	win	50	77	27	0.649	5	23	18	0.217	16	22	6	0.727	3	12	9	0.25	47	83	36	0.566	15	39	0.736	0.319	38	17	16	4	23	25	17	27	4	14	6	9	3	5	1	3	4	5	0	1
2022-03-08	shandong	112	103	9	win	28	49	21	0.571	11	32	21	0.344	23	27	4	0.852	1	1	0	1	36	78	42	0.462	15	23	0.548	0.385	26	12	14	5	21	26	10	14	4	12	6	10	6	12	4	9	1	4	2	4
2022-03-08	ningbo	94	121	-27	lose	24	59	35	0.407	10	30	20	0.333	16	21	5	0.762	9	15	6	0.6	21	70	49	0.3	15	26	0.634	0.294	24	5	12	2	25	18	3	6	8	20	4	14	4	17	1	7	3	9	1	4
2022-03-08	nanjing	91	131	-40	lose	22	51	29	0.431	12	40	28	0.3	11	17	6	0.647	7	17	10	0.412	26	73	47	0.356	14	32	0.681	0.264	21	4	24	3	25	23	3	11	9	22	1	6	6	11	1	3	1	3	2	5
2022-03-08	jilin	101	86	15	win	27	54	27	0.5	13	26	13	0.5	8	9	1	0.889	7	13	6	0.538	31	65	34	0.477	8	23	0.605	0.211	31	13	8	5	12	15	12	13	9	19	1	5	2	8	2	3	2	3	5	11
2022-03-08	guangsha	107	95	12	win	30	51	21	0.588	10	25	15	0.4	17	22	5	0.773	7	11	4	0.636	29	61	32	0.475	9	34	0.739	0.281	16	6	12	8	24	20	7	9	2	4	3	6	10	16	2	8	8	9	4	10
2022-03-08	fujian	116	145	-29	lose	28	63	35	0.444	13	31	18	0.419	21	24	3	0.875	2	2	0	1	39	92	53	0.424	7	22	0.611	0.146	21	4	9	3	24	23	11	12	5	12	1	7	2	12	1	4	0	2	4	12
2022-03-08	beijing	103	112	-9	lose	29	57	28	0.509	8	26	18	0.308	21	29	8	0.724	1	4	3	0.25	35	78	43	0.449	19	24	0.615	0.452	28	11	17	1	26	21	8	12	3	12	3	4	2	10	0	4	0	3	1	3
2021-03-09	zhejiang	120	92	28	win	35	60	25	0.583	9	21	12	0.429	23	32	9	0.719	4	8	4	0.5	36	69	33	0.522	14	29	0.784	0.378	24	9	13	2	16	24	7	12	6	11	3	7	12	23	4	9	1	2	4	4
2021-03-09	xinjiang	98	114	-16	lose	27	48	21	0.563	10	37	27	0.27	14	31	17	0.452	12	37	25	0.324	22	45	23	0.489	17	31	0.816	0.333	26	6	13	0	16	24	6	12	1	12	7	9	5	11	5	14	4	9	0	2
2021-03-09	shenzhen	114	98	16	win	20	35	15	0.571	22	49	27	0.449	8	10	2	0.8	18	34	16	0.529	23	49	26	0.469	7	34	0.667	0.184	25	8	13	3	24	16	7	13	12	26	5	13	8	13	3	6	0	2	2	4
2021-03-09	shanxi	86	98	-12	lose	20	48	28	0.417	13	37	24	0.351	7	10	3	0.7	10	24	14	0.417	21	59	38	0.356	13	30	0.667	0.325	13	7	14	1	19	19	6	14	3	15	2	8	4	11	3	5	4	8	1	3
2021-03-09	nanjing	92	120	-28	lose	32	57	25	0.561	8	24	16	0.333	4	6	2	0.667	6	8	2	0.75	32	71	39	0.451	8	23	0.622	0.216	20	7	19	1	24	16	7	10	7	15	3	7	10	15	1	2	5	8	2	7
2021-03-09	jilin	98	86	12	win	23	44	21	0.523	12	41	29	0.293	16	20	4	0.8	7	19	12	0.368	26	64	38	0.406	15	27	0.675	0.333	18	6	9	3	19	19	9	15	6	19	2	5	3	8	1	3	0	0	7	19
2021-03-09	beikong	109	98	11	win	26	45	19	0.578	9	20	11	0.45	30	37	7	0.811	5	12	7	0.417	27	50	23	0.54	8	26	0.667	0.364	17	2	13	8	26	31	1	3	9	15	3	4	8	15	1	4	5	6	7	11
2021-03-09	beijing	98	109	-11	lose	23	45	22	0.511	11	36	25	0.306	19	22	3	0.864	2	6	4	0.333	28	71	43	0.394	13	14	0.636	0.333	14	7	13	1	31	26	3	7	7	23	0	0	4	16	4	7	2	4	2	4
2022-03-09	shanxi	111	84	27	win	21	43	22	0.488	13	33	20	0.394	30	33	3	0.909	4	5	1	0.8	28	69	41	0.406	9	30	0.732	0.225	17	14	16	3	24	29	3	8	8	15	2	6	5	9	1	1	3	5	4	10
2022-03-09	jiangsu	84	111	-27	lose	22	44	22	0.5	8	31	23	0.258	16	21	5	0.762	4	8	4	0.5	23	64	41	0.359	11	31	0.775	0.268	12	9	24	3	29	24	6	10	1	6	3	6	9	18	5	10	0	4	2	6
2022-03-09	guangdong	93	106	-13	lose	29	57	28	0.509	5	30	25	0.167	20	28	8	0.714	3	9	6	0.333	29	76	47	0.382	10	32	0.78	0.2	14	8	19	6	25	31	13	23	2	15	1	7	9	18	2	7	0	2	2	3
2022-03-09	beikong	106	93	13	win	38	68	30	0.559	5	23	18	0.217	15	25	10	0.6	8	22	14	0.364	31	65	34	0.477	9	40	0.8	0.22	21	13	18	4	31	25	11	18	4	16	5	8	10	17	2	3	1	2	5	10
2019-03-10	zhejiang	120	106	14	win	17	37	20	0.459	18	37	19	0.486	32	43	11	0.744	14	34	20	0.412	19	38	19	0.5	15	31	0.689	0.429	22	13	26	5	27	33	12	21	3	14	2	4	4	13	2	4	2	3	0	4
2019-03-10	xinjiang	143	108	35	win	37	55	18	0.673	13	27	14	0.481	30	39	9	0.769	12	26	14	0.462	33	51	18	0.647	14	30	0.769	0.424	24	8	11	2	25	29	13	17	9	21	3	5	7	14	1	2	0	3	1	2
2019-03-10	tianjin	108	143	-35	lose	21	42	21	0.5	12	35	23	0.343	30	32	2	0.938	18	44	26	0.409	14	32	18	0.438	9	19	0.576	0.231	13	6	14	2	29	25	3	11	8	27	3	5	6	11	3	6	0	0	2	6
2019-03-10	sichuan	88	104	-16	lose	24	46	22	0.522	6	31	25	0.194	22	31	9	0.71	4	14	10	0.286	23	60	37	0.383	11	28	0.622	0.234	13	9	13	4	25	28	7	11	6	14	1	5	7	25	1	7	2	5	2	4
2019-03-10	shanxi	110	106	4	win	24	52	28	0.462	11	36	25	0.306	29	36	7	0.806	16	44	28	0.364	17	42	25	0.405	15	35	0.66	0.288	24	13	10	2	16	26	16	23	9	25	3	11	4	14	2	8	1	1	0	3
2019-03-10	shanghai	110	78	32	win	33	71	38	0.465	13	25	12	0.52	5	11	6	0.455	10	23	13	0.435	35	72	37	0.486	18	29	0.744	0.391	25	9	7	6	8	13	10	15	6	12	0	8	7	27	4	8	2	3	2	8
2019-03-10	ningbo	104	88	16	win	27	62	35	0.435	11	28	17	0.393	17	27	10	0.63	3	7	4	0.429	32	80	48	0.4	17	36	0.766	0.378	16	7	14	3	28	25	3	10	8	22	5	11	9	25	3	7	10	18	0	2
2019-03-10	nanjing	78	110	-32	lose	27	60	33	0.45	5	15	10	0.333	9	12	3	0.75	7	14	7	0.5	22	58	36	0.379	10	28	0.609	0.256	7	3	18	7	13	8	4	7	4	9	4	12	13	30	0	2	3	8	4	7
2019-03-10	liaoning	94	107	-13	lose	21	50	29	0.42	11	35	24	0.314	19	27	8	0.704	4	20	16	0.2	26	63	37	0.413	15	26	0.667	0.294	15	14	11	1	28	24	7	13	6	26	3	10	5	14	2	2	1	2	2	6
2019-03-10	jiangsu	110	91	19	win	37	56	19	0.661	8	29	21	0.276	12	15	3	0.8	9	29	20	0.31	35	55	20	0.636	5	39	0.709	0.122	27	4	6	4	26	20	9	15	5	13	1	3	8	13	2	7	6	9	4	6
2019-03-10	guangzhou	106	120	-14	lose	28	59	31	0.475	6	23	17	0.261	32	38	6	0.842	7	25	18	0.28	27	57	30	0.474	14	20	0.571	0.311	19	16	17	4	33	27	8	14	4	13	1	6	9	19	2	5	2	3	2	6
2019-03-10	guangdong	107	94	13	win	27	51	24	0.529	10	23	13	0.435	23	33	10	0.697	6	14	8	0.429	26	55	29	0.473	13	36	0.706	0.333	20	5	19	7	24	28	9	15	7	13	2	9	7	16	2	2	1	3	4	9
2019-03-10	fujian	91	110	-19	lose	24	58	34	0.414	5	29	24	0.172	28	35	7	0.8	9	30	21	0.3	19	56	37	0.339	16	36	0.878	0.291	14	2	7	2	20	26	4	5	6	23	3	11	7	19	1	1	5	10	4	11
2019-03-10	beikong	106	110	-4	lose	32	58	26	0.552	10	37	27	0.27	12	20	8	0.6	11	36	25	0.306	29	57	28	0.509	18	37	0.712	0.34	20	8	16	2	26	16	6	17	8	14	0	3	8	21	2	7	5	8	1	5
2021-03-10	sichuan	79	93	-14	lose	23	49	26	0.469	4	22	18	0.182	21	32	11	0.656	3	13	10	0.231	23	57	34	0.404	10	31	0.738	0.217	19	11	19	2	14	24	9	15	3	11	0	3	2	11	3	3	0	5	0	2
2021-03-10	shanghai	116	109	7	win	27	53	26	0.509	15	34	19	0.441	17	25	8	0.68	9	18	9	0.5	33	69	36	0.478	15	34	0.756	0.349	19	10	16	7	27	27	7	10	7	15	1	3	5	10	3	6	3	4	1	4
2021-03-10	shandong	90	104	-14	lose	23	62	39	0.371	9	28	19	0.321	17	24	7	0.708	7	19	12	0.368	25	71	46	0.352	25	18	0.692	0.455	16	10	12	3	18	25	5	13	3	11	2	7	5	18	1	3	1	6	0	4
2021-03-10	qingdao	109	116	-7	lose	25	58	33	0.431	14	31	17	0.452	17	26	9	0.654	4	12	8	0.333	29	71	42	0.408	11	28	0.651	0.244	13	9	17	3	27	27	8	20	3	5	2	7	8	17	2	3	8	12	3	5
2021-03-10	liaoning	93	79	14	win	28	52	24	0.538	10	33	23	0.303	7	12	5	0.583	9	30	21	0.3	26	52	26	0.5	11	36	0.783	0.262	20	8	16	4	24	14	6	12	8	27	0	2	3	5	2	5	3	4	0	2
2021-03-10	jiangsu	108	128	-20	lose	24	51	27	0.471	14	33	19	0.424	18	22	4	0.818	10	30	20	0.333	24	50	26	0.48	10	24	0.667	0.244	28	6	16	3	28	24	7	15	8	21	1	3	6	7	1	3	0	3	0	0
2021-03-10	guangzhou	103	108	-5	lose	32	57	25	0.561	9	29	20	0.31	12	14	2	0.857	7	19	12	0.368	34	67	33	0.507	11	26	0.743	0.289	19	6	14	1	25	21	4	6	2	11	1	6	14	22	2	5	4	6	2	4
2021-03-10	guangsha	108	103	5	win	34	52	18	0.654	6	23	17	0.261	22	31	9	0.71	7	18	11	0.389	32	56	24	0.571	9	27	0.711	0.257	26	9	13	2	21	25	7	12	5	13	1	2	3	7	2	4	2	3	0	0
2021-03-10	guangdong	104	90	14	win	25	43	18	0.581	15	32	17	0.469	9	11	2	0.818	8	19	11	0.421	29	53	24	0.547	8	30	0.545	0.308	22	4	19	6	25	18	10	13	6	15	5	6	7	16	0	3	0	1	2	4
2021-03-10	fujian	128	108	20	win	31	54	23	0.574	15	30	15	0.5	21	26	5	0.808	14	24	10	0.583	28	56	28	0.5	12	31	0.756	0.333	26	6	14	3	24	28	8	14	7	14	1	2	4	6	3	4	1	2	1	2
2022-03-10	xinjiang	116	115	1	win	34	65	31	0.523	8	23	15	0.348	24	33	9	0.727	3	11	8	0.273	32	70	38	0.457	18	26	0.634	0.383	27	9	15	3	21	29	5	8	6	17	1	9	5	12	2	2	10	14	0	1
2022-03-10	sichuan	96	84	12	win	27	49	22	0.551	8	21	13	0.381	18	24	6	0.75	4	12	8	0.333	28	55	27	0.509	11	26	0.619	0.393	28	4	8	5	20	23	3	5	2	8	1	5	5	12	3	7	4	6	1	1
2022-03-10	shenzhen	115	116	-1	lose	36	57	21	0.632	6	27	21	0.222	25	32	7	0.781	3	8	5	0.375	35	72	37	0.486	15	29	0.617	0.366	25	9	15	3	29	21	5	12	2	17	5	8	9	15	1	1	3	3	3	6
2022-03-10	shanghai	94	81	13	win	27	62	35	0.435	8	25	17	0.32	16	27	11	0.593	7	17	10	0.412	27	69	42	0.391	17	39	0.722	0.333	33	14	17	6	29	26	11	18	7	15	4	18	4	12	2	6	1	2	0	2
2022-03-10	shandong	143	115	28	win	33	53	20	0.623	18	43	25	0.419	23	28	5	0.821	9	13	4	0.692	38	79	41	0.481	19	32	0.727	0.475	40	8	11	4	26	23	8	15	12	25	7	16	7	15	2	5	2	2	3	5
2022-03-10	qingdao	89	121	-32	lose	22	45	23	0.489	11	29	18	0.379	12	20	8	0.6	1	5	4	0.2	32	69	37	0.464	9	19	0.633	0.225	20	6	11	3	18	21	7	8	4	15	1	3	4	14	1	4	3	7	4	8
2022-03-10	nanjing	84	96	-12	lose	22	53	31	0.415	7	23	16	0.304	19	20	1	0.95	14	26	12	0.538	15	50	35	0.3	16	17	0.607	0.381	12	5	10	1	23	20	0	1	7	23	2	5	5	9	0	4	2	2	3	5
2022-03-10	jilin	81	94	-13	lose	27	66	39	0.409	2	19	17	0.105	21	28	7	0.75	0	13	13	0	23	66	43	0.348	15	34	0.667	0.278	17	10	19	8	26	29	5	15	4	13	1	5	10	22	0	2	0	2	5	15
2022-03-10	guangzhou	56	84	-28	lose	11	40	29	0.275	7	26	19	0.269	13	20	7	0.65	3	4	1	0.75	14	61	47	0.23	8	37	0.841	0.178	18	4	22	0	26	24	2	3	5	16	4	10	1	7	0	2	0	3	0	2
2022-03-10	guangsha	121	89	32	win	29	48	19	0.604	18	32	14	0.563	9	12	3	0.75	2	3	1	0.667	43	75	32	0.573	11	31	0.775	0.367	29	6	13	6	21	18	7	7	10	19	8	9	7	12	2	4	6	9	2	4
2022-03-10	fujian	115	143	-28	lose	22	46	24	0.478	13	36	23	0.361	32	40	8	0.8	3	6	3	0.5	28	72	44	0.389	12	21	0.525	0.273	21	8	13	1	23	26	8	14	5	16	3	7	6	13	0	2	1	2	2	3
2022-03-10	beijing	84	56	28	win	20	45	25	0.444	8	30	22	0.267	20	25	5	0.8	2	4	2	0.5	25	70	45	0.357	7	37	0.822	0.159	25	11	9	5	24	26	3	7	8	27	4	8	1	1	4	7	1	3	0	1
2021-03-11	zhejiang	106	85	21	win	31	46	15	0.674	5	23	18	0.217	29	38	9	0.763	4	15	11	0.267	29	51	22	0.569	10	32	0.78	0.333	15	10	15	7	15	23	8	10	1	10	4	9	13	17	3	8	1	1	3	6
2021-03-11	xinjiang	119	88	31	win	35	57	22	0.614	13	26	13	0.5	10	17	7	0.588	6	15	9	0.4	40	66	26	0.606	12	25	0.806	0.333	28	13	14	3	19	21	13	19	7	19	0	3	2	7	5	7	6	8	1	1
2021-03-11	tianjin	85	106	-21	lose	25	48	23	0.521	8	28	20	0.286	11	15	4	0.733	4	17	13	0.235	28	58	30	0.483	9	20	0.667	0.22	19	9	18	3	23	15	6	9	4	19	2	5	6	12	1	5	2	4	1	5
2021-03-11	shenzhen	127	86	41	win	29	40	11	0.725	18	39	21	0.462	15	22	7	0.682	13	25	12	0.52	30	50	20	0.6	7	38	0.809	0.206	39	8	13	3	16	20	11	18	13	22	5	6	5	7	2	3	4	6	0	2
2021-03-11	shanxi	88	119	-31	lose	27	49	22	0.551	9	19	10	0.474	7	12	5	0.583	2	6	4	0.333	33	61	28	0.541	6	24	0.667	0.194	22	8	24	1	21	19	4	6	2	9	0	3	2	10	2	4	6	7	3	7
2021-03-11	nanjing	86	127	-41	lose	20	44	24	0.455	11	40	29	0.275	13	14	1	0.929	7	25	18	0.28	21	56	35	0.375	9	27	0.794	0.191	20	8	16	1	20	16	1	8	9	24	3	3	4	7	2	6	0	2	3	6
2021-03-11	jilin	89	102	-13	lose	26	46	20	0.565	7	27	20	0.259	16	28	12	0.571	8	18	10	0.444	25	55	30	0.455	14	21	0.6	0.318	18	6	8	3	18	25	4	6	7	15	2	8	10	20	3	6	1	2	2	8
2021-03-11	beijing	102	89	13	win	27	46	19	0.587	11	29	18	0.379	15	21	6	0.714	9	24	15	0.375	25	47	22	0.532	14	30	0.682	0.4	24	6	10	4	25	18	3	6	9	20	0	4	5	14	2	5	3	3	3	4
2022-03-11	tianjin	115	93	22	win	26	46	20	0.565	14	44	30	0.318	21	23	2	0.913	10	19	9	0.526	28	69	41	0.406	14	37	0.787	0.311	27	9	14	3	30	27	6	9	6	21	4	9	10	18	3	5	1	3	2	6
2022-03-11	ningbo	88	111	-23	lose	27	54	27	0.5	7	27	20	0.259	13	18	5	0.722	3	13	10	0.231	29	66	37	0.439	12	26	0.667	0.267	27	11	20	2	28	23	6	12	9	22	5	9	5	7	0	0	2	5	1	2
2022-03-11	liaoning	101	75	26	win	29	55	26	0.527	9	29	20	0.31	16	21	5	0.762	6	12	6	0.5	27	67	40	0.403	15	21	0.618	0.417	19	14	14	7	17	25	4	10	8	17	0	7	9	14	2	6	1	5	5	10
2022-03-11	jiangsu	75	101	-26	lose	21	47	26	0.447	8	28	20	0.286	9	13	4	0.692	4	16	12	0.25	24	58	34	0.414	13	21	0.583	0.382	17	6	23	1	25	17	5	7	4	17	1	5	6	12	6	7	0	1	1	2
2022-03-11	guangdong	111	88	23	win	33	60	27	0.55	7	19	12	0.368	24	33	9	0.727	2	7	5	0.286	33	67	34	0.493	13	33	0.733	0.333	25	9	19	2	23	28	11	15	4	10	4	8	13	21	1	5	0	3	3	5
2022-03-11	beikong	93	115	-22	lose	23	47	24	0.489	7	31	24	0.226	26	35	9	0.743	3	16	13	0.188	22	57	35	0.386	10	31	0.689	0.213	19	5	12	7	27	30	5	10	1	14	4	13	3	6	1	4	2	6	1	3
2021-03-12	qingdao	104	120	-16	lose	29	45	16	0.644	9	32	23	0.281	19	34	15	0.559	2	7	5	0.286	32	66	34	0.485	7	30	0.667	0.175	16	5	16	2	23	32	12	18	6	17	1	7	11	17	0	0	2	3	3	8
2021-03-12	liaoning	102	109	-7	lose	26	59	33	0.441	11	28	17	0.393	17	21	4	0.81	7	16	9	0.438	29	70	41	0.414	15	20	0.69	0.319	22	8	8	3	24	19	3	8	9	15	3	7	5	14	5	11	1	2	0	4
2021-03-12	guangsha	109	102	7	win	30	50	20	0.6	8	20	12	0.4	25	33	8	0.758	7	13	6	0.538	29	55	26	0.527	9	32	0.681	0.31	29	4	13	7	19	24	8	11	7	16	1	6	4	9	3	5	1	2	0	2
2021-03-12	guangdong	120	104	16	win	37	58	21	0.638	10	36	26	0.278	16	20	4	0.8	5	13	8	0.385	36	75	39	0.48	15	33	0.825	0.333	22	6	14	1	32	23	9	19	9	21	4	9	8	10	0	4	2	2	1	4
2022-03-12	xinjiang	140	134	6	win	46	71	25	0.648	8	27	19	0.296	24	31	7	0.774	3	12	9	0.25	46	81	35	0.568	13	30	0.667	0.302	39	12	12	3	22	29	14	19	5	18	4	4	7	10	3	5	12	20	0	0
2022-03-12	shenzhen	111	106	5	win	31	54	23	0.574	9	30	21	0.3	22	25	3	0.88	4	15	11	0.267	33	66	33	0.5	9	33	0.717	0.225	29	9	9	3	13	23	12	16	6	16	0	5	5	10	1	2	3	3	0	2
2022-03-12	shanghai	95	101	-6	lose	25	64	39	0.391	7	27	20	0.259	24	29	5	0.828	3	12	9	0.25	25	75	50	0.333	25	24	0.649	0.463	16	10	16	6	28	27	7	17	3	12	3	13	7	21	1	3	2	5	2	4
2022-03-12	shandong	106	111	-5	lose	25	48	23	0.521	17	45	28	0.378	5	7	2	0.714	2	7	5	0.286	40	86	46	0.465	13	31	0.775	0.283	21	5	14	4	23	13	5	13	7	22	4	4	9	11	5	13	2	3	2	6
2022-03-12	qingdao	119	98	21	win	40	62	22	0.645	7	30	23	0.233	18	28	10	0.643	3	5	2	0.6	44	87	43	0.506	10	36	0.75	0.244	35	15	13	5	23	17	12	18	3	14	2	5	7	11	3	7	0	0	1	1
2022-03-12	nanjing	98	119	-21	lose	33	62	29	0.532	6	26	20	0.231	14	21	7	0.667	2	8	6	0.25	33	76	43	0.434	12	31	0.756	0.25	26	7	20	2	17	23	10	13	3	12	3	8	5	8	6	9	1	4	1	2
2022-03-12	guangsha	101	95	6	win	29	47	18	0.617	8	28	20	0.286	19	29	10	0.655	7	16	9	0.438	27	56	29	0.482	13	29	0.537	0.351	23	10	19	6	27	28	5	11	4	11	6	8	7	12	3	9	4	5	0	2
2022-03-12	fujian	134	140	-6	lose	38	68	30	0.559	13	33	20	0.394	19	22	3	0.864	5	11	6	0.455	40	84	44	0.476	15	30	0.698	0.333	26	7	19	3	29	22	15	26	8	15	3	8	13	23	2	3	0	2	9	16
2021-03-13	zhejiang	116	94	22	win	37	58	21	0.638	10	28	18	0.357	12	20	8	0.6	6	20	14	0.3	39	64	25	0.609	18	32	0.78	0.474	31	8	14	3	29	18	16	17	3	13	3	5	10	18	6	13	3	4	0	1
2021-03-13	tianjin	90	83	7	win	22	46	24	0.478	13	38	25	0.342	7	11	4	0.636	9	32	23	0.281	25	51	26	0.49	12	33	0.717	0.279	23	11	16	2	25	16	2	10	8	24	7	11	8	13	2	9	2	3	0	1
2021-03-13	sichuan	89	118	-29	lose	19	42	23	0.452	9	29	20	0.31	24	33	9	0.727	4	18	14	0.222	22	51	29	0.431	8	18	0.581	0.195	16	14	19	3	21	29	3	10	3	10	2	7	8	16	1	2	3	7	3	5
2021-03-13	shenzhen	83	90	-7	lose	24	46	22	0.522	6	29	23	0.207	17	26	9	0.654	5	25	20	0.2	20	45	25	0.444	13	31	0.721	0.283	11	13	16	4	16	25	5	10	3	14	3	14	8	19	2	6	2	4	1	1
2021-03-13	shanxi	85	93	-8	lose	24	56	32	0.429	8	28	20	0.286	13	16	3	0.813	4	10	6	0.4	25	71	46	0.352	22	23	0.742	0.468	15	6	20	1	19	19	4	6	6	13	3	5	8	16	1	6	1	4	2	9
2021-03-13	shanghai	113	94	19	win	18	39	21	0.462	15	32	17	0.469	32	42	10	0.762	15	27	12	0.556	16	42	26	0.381	14	28	0.718	0.4	15	4	12	3	25	29	4	8	10	16	0	4	5	10	0	3	3	4	4	7
2021-03-13	shandong	118	89	29	win	31	51	20	0.608	10	24	14	0.417	26	26	0	1	15	27	12	0.556	22	44	22	0.5	13	33	0.805	0.419	26	10	23	2	29	21	4	7	9	18	8	11	7	10	0	0	1	2	1	1
2021-03-13	nanjing	89	119	-30	lose	27	50	23	0.54	5	19	14	0.263	20	24	4	0.833	1	10	9	0.1	27	55	28	0.491	7	22	0.688	0.2	19	4	20	4	26	21	5	9	4	12	4	6	7	12	0	0	5	10	0	4
2021-03-13	jilin	94	116	-22	lose	26	54	28	0.481	5	14	9	0.357	27	37	10	0.73	5	14	9	0.357	23	51	28	0.451	9	20	0.526	0.22	16	9	14	6	18	29	4	8	5	13	3	9	8	17	2	6	1	2	1	4
2021-03-13	jiangsu	94	113	-19	lose	24	50	26	0.48	9	26	17	0.346	19	32	13	0.594	11	23	12	0.478	19	50	31	0.38	11	21	0.6	0.282	16	7	9	3	29	25	4	11	5	12	2	4	7	18	4	5	0	1	0	1
2021-03-13	beikong	93	85	8	win	29	53	24	0.547	8	19	11	0.421	11	16	5	0.688	7	12	5	0.583	26	56	30	0.464	8	25	0.532	0.258	16	14	13	1	19	19	5	7	6	12	4	12	6	15	1	4	3	5	2	4
2021-03-13	beijing	119	89	30	win	32	51	19	0.627	9	21	12	0.429	28	32	4	0.875	6	10	4	0.6	33	60	27	0.55	10	28	0.8	0.313	25	10	13	6	21	26	6	10	4	10	3	5	9	17	4	6	4	6	2	4
2022-03-13	zhejiang	82	101	-19	lose	26	58	32	0.448	4	10	6	0.4	18	23	5	0.783	4	9	5	0.444	26	59	33	0.441	14	28	0.56	0.35	16	8	21	5	25	23	7	10	2	8	4	10	6	16	1	4	1	2	2	3
2022-03-13	tianjin	110	88	22	win	23	47	24	0.489	10	29	19	0.345	34	41	7	0.829	0	7	7	0	28	64	36	0.438	12	37	0.771	0.308	15	7	12	5	26	28	5	7	3	12	3	5	7	14	2	3	2	5	5	14
2022-03-13	sichuan	99	117	-18	lose	31	50	19	0.62	6	20	14	0.3	19	20	1	0.95	6	13	7	0.462	28	54	26	0.519	9	29	0.707	0.321	30	3	19	1	17	22	0	2	6	13	1	2	3	7	1	4	9	11	1	5
2022-03-13	shanxi	117	99	18	win	31	52	21	0.596	15	35	20	0.429	10	14	4	0.714	9	15	6	0.6	32	67	35	0.478	12	19	0.679	0.293	24	10	7	4	22	17	6	8	11	18	2	4	2	5	4	7	3	3	4	4
2022-03-13	ningbo	88	110	-22	lose	24	52	28	0.462	6	24	18	0.25	22	31	9	0.71	4	9	5	0.444	22	63	41	0.349	11	27	0.692	0.229	17	7	15	5	28	26	4	7	3	17	0	6	4	9	0	1	6	10	0	3
2022-03-13	liaoning	101	82	19	win	33	61	28	0.541	6	30	24	0.2	17	25	8	0.68	6	14	8	0.429	29	73	44	0.397	22	26	0.65	0.44	19	13	10	5	23	25	7	12	4	20	4	12	3	6	2	3	1	4	1	1
2022-03-13	jilin	109	95	14	win	27	44	17	0.614	12	31	19	0.387	19	26	7	0.731	4	6	2	0.667	29	63	34	0.46	7	23	0.676	0.2	24	9	9	5	15	24	7	11	8	17	1	5	6	10	2	4	1	2	8	15
2022-03-13	jiangsu	95	109	-14	lose	31	53	22	0.585	7	25	18	0.28	12	17	5	0.706	3	14	11	0.214	32	61	29	0.525	11	28	0.8	0.324	23	6	19	3	24	15	6	10	2	6	7	16	12	20	1	3	1	1	0	1
2022-03-13	guangzhou	120	101	19	win	24	43	19	0.558	18	40	22	0.45	18	25	7	0.72	9	26	17	0.346	29	53	24	0.547	14	31	0.721	0.341	21	8	14	3	29	25	7	8	5	21	2	5	7	11	2	5	2	5	5	7
2022-03-13	guangdong	101	120	-19	lose	25	51	26	0.49	7	28	21	0.25	30	36	6	0.833	6	21	15	0.286	24	56	32	0.429	12	27	0.659	0.279	24	6	11	2	25	29	4	7	6	12	4	9	9	20	2	5	2	4	2	3
2022-03-13	beikong	81	97	-16	lose	23	43	20	0.535	6	25	19	0.24	17	27	10	0.63	3	11	8	0.273	23	54	31	0.426	10	32	0.696	0.238	15	3	18	3	22	27	3	9	3	11	0	5	2	9	1	3	7	12	1	4
2022-03-13	beijing	97	81	16	win	22	43	21	0.512	10	36	26	0.278	23	28	5	0.821	1	5	4	0.2	25	68	43	0.368	14	32	0.762	0.304	24	11	12	2	27	22	8	12	10	19	0	4	2	5	1	5	2	2	0	1
2021-03-14	liaoning	126	105	21	win	34	56	22	0.607	13	33	20	0.394	19	29	10	0.655	9	20	11	0.45	33	64	31	0.516	12	33	0.846	0.267	25	12	9	2	14	23	12	12	7	21	4	6	9	15	3	7	2	3	2	4
2021-03-14	guangzhou	104	110	-6	lose	21	35	14	0.6	17	37	20	0.459	11	16	5	0.688	5	8	3	0.625	32	63	31	0.508	11	28	0.7	0.355	20	5	23	2	28	23	7	10	10	22	1	6	4	10	1	3	5	6	0	0
2021-03-14	guangdong	110	104	6	win	24	44	20	0.545	15	37	22	0.405	17	26	9	0.654	3	6	3	0.5	34	73	39	0.466	12	20	0.645	0.3	27	10	13	5	23	28	12	18	8	17	2	4	5	8	2	4	3	10	0	4
2021-03-14	fujian	105	126	-21	lose	22	44	22	0.5	17	32	15	0.531	10	16	6	0.625	9	15	6	0.6	30	61	31	0.492	6	33	0.733	0.154	23	7	19	4	23	14	10	13	7	14	5	9	5	12	5	6	3	6	1	6
2022-03-14	xinjiang	104	105	-1	lose	35	67	32	0.522	6	26	20	0.231	16	23	7	0.696	6	12	6	0.5	34	80	46	0.425	18	25	0.694	0.409	34	12	12	3	27	25	7	13	7	26	1	4	7	16	5	7	9	13	2	5
2022-03-14	shenzhen	105	104	1	win	28	47	19	0.596	7	25	18	0.28	28	36	8	0.778	4	11	7	0.364	30	60	30	0.5	11	26	0.591	0.306	24	4	19	7	25	27	8	14	4	9	1	5	4	7	0	1	2	6	3	4
2022-03-14	qingdao	103	96	7	win	25	45	20	0.556	12	21	9	0.571	17	19	2	0.895	2	2	0	1	32	61	29	0.525	4	24	0.558	0.148	28	9	12	4	22	20	4	5	8	10	2	2	7	11	1	3	0	1	3	8
2022-03-14	guangsha	96	103	-7	lose	26	45	19	0.578	9	37	28	0.243	17	22	5	0.773	4	9	5	0.444	29	71	42	0.408	19	23	0.852	0.442	24	7	14	3	20	22	2	6	5	20	0	2	1	3	2	4	3	7	2	3
2021-03-15	zhejiang	123	108	15	win	30	41	11	0.732	13	25	12	0.52	24	34	10	0.706	12	20	8	0.6	30	45	15	0.667	10	31	0.66	0.385	21	7	22	5	28	30	3	5	6	12	3	7	11	19	3	5	0	0	3	5
2021-03-15	xinjiang	108	123	-15	lose	31	62	31	0.5	11	27	16	0.407	13	25	12	0.52	9	23	14	0.391	30	63	33	0.476	16	16	0.615	0.34	29	12	12	3	30	28	9	13	5	15	3	9	6	13	3	8	3	9	0	0
2021-03-15	shenzhen	119	94	25	win	30	53	23	0.566	16	31	15	0.516	11	20	9	0.55	3	3	0	1	41	79	38	0.519	9	33	0.733	0.25	30	11	12	5	23	23	8	13	10	20	4	8	12	17	3	4	2	2	3	7
2021-03-15	shanxi	108	90	18	win	25	48	23	0.521	15	29	14	0.517	13	23	10	0.565	10	16	6	0.625	25	56	31	0.446	13	31	0.886	0.333	23	7	15	3	21	23	1	4	6	15	2	6	7	12	8	10	3	6	3	5
2021-03-15	shanghai	88	98	-10	lose	22	43	21	0.512	9	30	21	0.3	17	19	2	0.895	6	16	10	0.375	24	56	32	0.429	3	30	0.714	0.079	18	6	15	5	23	19	10	16	2	13	5	7	4	6	3	7	1	4	1	2
2021-03-15	shandong	98	88	10	win	28	60	32	0.467	8	23	15	0.348	18	23	5	0.783	4	8	4	0.5	31	74	43	0.419	12	35	0.921	0.286	21	7	17	5	19	23	5	9	3	14	1	3	5	10	2	5	3	9	0	5
2021-03-15	nanjing	90	108	-18	lose	27	45	18	0.6	8	26	18	0.308	12	16	4	0.75	7	17	10	0.412	27	53	26	0.509	4	26	0.667	0.114	21	5	15	2	23	21	5	9	3	16	2	4	7	12	3	4	2	3	1	4
2021-03-15	beikong	94	119	-25	lose	27	54	27	0.5	9	33	24	0.273	13	17	4	0.765	7	15	8	0.467	27	70	43	0.386	12	27	0.75	0.267	20	7	15	3	23	23	4	11	7	14	1	5	1	8	3	6	0	4	0	2
2022-03-15	zhejiang	111	115	-4	lose	28	57	29	0.491	10	30	20	0.333	25	30	5	0.833	9	15	6	0.6	25	68	43	0.368	15	29	0.879	0.333	20	6	9	7	19	20	8	13	2	14	4	13	4	13	2	9	1	3	1	4
2022-03-15	tianjin	134	124	10	win	26	47	21	0.553	21	35	14	0.6	19	23	4	0.826	10	13	3	0.769	31	63	32	0.492	8	26	0.722	0.308	26	5	17	1	22	23	8	13	7	9	4	5	9	14	3	6	0	0	5	10
2022-03-15	sichuan	85	121	-36	lose	22	46	24	0.478	9	29	20	0.31	14	18	4	0.778	5	15	10	0.333	25	59	34	0.424	12	29	0.763	0.279	27	6	22	3	21	18	10	15	3	16	0	4	2	8	1	5	3	7	1	3
2022-03-15	shandong	124	134	-10	lose	30	43	13	0.698	16	44	28	0.364	16	20	4	0.8	5	21	16	0.238	39	64	25	0.609	10	18	0.692	0.278	25	6	11	3	23	22	7	9	10	22	3	6	11	16	4	10	1	1	3	7
2022-03-15	nanjing	91	99	-8	lose	23	47	24	0.489	10	26	16	0.385	15	22	7	0.682	6	16	10	0.375	24	54	30	0.444	6	33	0.805	0.167	24	11	23	2	32	24	5	9	2	8	3	5	2	4	3	12	2	5	4	5
2022-03-15	liaoning	121	85	36	win	33	59	26	0.559	14	26	12	0.538	13	23	10	0.565	11	15	4	0.733	31	65	34	0.477	9	31	0.721	0.237	20	16	12	3	18	21	10	19	10	15	1	2	5	11	0	3	2	3	7	13
2022-03-15	jilin	115	111	4	win	38	64	26	0.594	7	20	13	0.35	18	18	0	1	5	10	5	0.5	35	69	34	0.507	4	30	0.667	0.121	26	7	10	0	20	19	11	16	7	12	1	5	6	17	1	1	0	0	8	13
2022-03-15	jiangsu	99	91	8	win	23	43	20	0.535	10	30	20	0.333	23	34	11	0.676	5	14	9	0.357	23	54	31	0.426	8	30	0.833	0.195	30	11	16	3	24	32	6	9	7	15	1	5	5	10	2	6	2	5	1	1
2022-03-15	guangzhou	125	107	18	win	38	63	25	0.603	8	30	22	0.267	25	33	8	0.758	1	11	10	0.091	42	79	37	0.532	11	42	0.808	0.244	29	12	12	3	32	29	15	25	4	17	8	12	9	10	1	4	4	8	0	1
2022-03-15	guangdong	109	80	29	win	28	55	27	0.509	11	27	16	0.407	20	27	7	0.741	4	8	4	0.5	34	73	39	0.466	20	37	0.822	0.541	27	11	18	2	25	18	5	14	9	16	5	8	9	15	1	2	0	1	1	2
2022-03-15	fujian	107	125	-18	lose	26	55	29	0.473	9	32	23	0.281	28	38	10	0.737	4	10	6	0.4	25	71	46	0.352	10	34	0.756	0.192	23	7	20	3	29	32	9	20	6	14	6	10	4	6	0	1	1	1	1	4
2022-03-15	beikong	80	109	-29	lose	14	37	23	0.378	11	34	23	0.324	19	26	7	0.731	6	18	12	0.333	14	48	34	0.292	8	17	0.459	0.178	16	13	19	5	18	25	9	14	6	14	1	6	1	12	2	6	0	0	0	4
2021-03-16	tianjin	84	95	-11	lose	24	46	22	0.522	8	32	24	0.25	12	18	6	0.667	7	21	14	0.333	21	53	32	0.396	7	27	0.692	0.163	19	8	14	5	21	23	9	18	5	16	3	6	3	11	1	6	2	3	2	7
2021-03-16	sichuan	108	89	19	win	29	45	16	0.644	7	30	23	0.233	29	40	11	0.725	6	22	16	0.273	21	44	23	0.477	12	34	0.723	0.316	20	8	22	5	27	33	5	7	7	23	2	5	2	5	0	1	4	8	0	2
2021-03-16	jiangsu	89	108	-19	lose	28	60	32	0.467	3	24	21	0.125	24	32	8	0.75	2	12	10	0.167	28	71	43	0.394	13	26	0.684	0.277	12	11	19	3	33	27	8	14	2	11	2	4	3	10	2	3	1	4	2	7
2021-03-16	beijing	95	84	11	win	27	53	26	0.509	9	26	17	0.346	14	21	7	0.667	7	16	9	0.438	28	62	34	0.452	12	36	0.837	0.308	22	9	18	5	23	21	7	12	3	15	2	6	6	12	2	7	2	3	1	6
2022-03-16	shanxi	111	135	-24	lose	28	50	22	0.56	12	40	28	0.3	19	24	5	0.792	3	10	7	0.3	35	78	43	0.449	13	27	0.794	0.277	20	11	13	0	20	24	6	8	1	13	2	4	9	16	2	5	0	0	3	8
2022-03-16	shanghai	135	111	24	win	31	44	13	0.705	19	41	22	0.463	16	17	1	0.941	6	10	4	0.6	40	71	31	0.563	7	34	0.723	0.206	29	7	19	1	24	20	10	12	11	22	2	4	3	8	1	4	3	5	4	9
2022-03-16	ningbo	70	106	-36	lose	24	54	30	0.444	4	22	18	0.182	10	23	13	0.435	3	12	9	0.25	21	60	39	0.35	12	25	0.714	0.222	11	8	15	2	22	21	3	5	4	13	3	5	5	9	2	8	7	16	0	4
2022-03-16	beijing	106	70	36	win	33	54	21	0.611	8	19	11	0.421	16	25	9	0.64	7	14	7	0.5	32	57	25	0.561	10	42	0.778	0.286	22	8	11	4	21	22	7	10	9	14	3	6	7	14	3	8	3	4	3	8
2021-03-17	shenzhen	98	109	-11	lose	24	44	20	0.545	9	34	25	0.265	23	32	9	0.719	9	22	13	0.409	19	51	32	0.373	8	30	0.714	0.178	22	10	14	0	22	25	8	17	5	17	2	8	4	8	0	0	0	2	0	5
2021-03-17	shandong	113	116	-3	lose	23	44	21	0.523	18	41	23	0.439	13	17	4	0.765	8	15	7	0.533	30	67	37	0.448	13	34	0.895	0.31	26	4	17	0	24	20	9	16	4	16	6	7	7	13	1	5	2	4	2	5
2021-03-17	nanjing	82	105	-23	lose	24	44	20	0.545	7	28	21	0.25	13	16	3	0.813	1	5	4	0.2	26	63	37	0.413	8	31	0.738	0.229	17	3	24	2	24	15	3	11	6	16	6	12	8	14	1	4	2	5	1	1
2021-03-17	liaoning	105	82	23	win	29	47	18	0.617	9	35	26	0.257	20	25	5	0.8	3	14	11	0.214	32	65	33	0.492	11	27	0.771	0.262	26	15	9	2	15	24	9	12	7	23	2	5	10	14	4	7	0	3	0	0
2021-03-17	jilin	116	113	3	win	32	51	19	0.627	12	26	14	0.462	16	28	12	0.571	7	14	7	0.5	34	60	26	0.567	4	29	0.69	0.105	28	12	9	5	20	24	10	14	7	15	3	3	5	7	1	1	3	5	3	10
2021-03-17	guangzhou	119	92	27	win	27	54	27	0.5	18	32	14	0.563	11	15	4	0.733	13	23	10	0.565	32	63	31	0.508	11	32	0.667	0.324	28	3	9	6	21	18	5	8	12	23	5	8	8	21	2	2	1	6	3	6
2021-03-17	guangdong	109	98	11	win	33	53	20	0.623	11	32	21	0.344	10	17	7	0.588	8	20	12	0.4	35	64	29	0.547	12	37	0.822	0.286	21	7	16	1	25	22	14	23	5	14	3	5	8	16	1	3	2	5	2	7
2021-03-17	beikong	92	119	-27	lose	22	58	36	0.379	11	29	18	0.379	15	21	6	0.714	19	42	23	0.452	11	42	31	0.262	16	23	0.676	0.333	20	5	11	3	18	21	7	20	4	12	1	9	3	9	3	5	1	2	0	0
2022-03-17	zhejiang	101	104	-3	lose	30	62	32	0.484	6	25	19	0.24	23	26	3	0.885	2	6	4	0.333	28	75	47	0.373	17	26	0.684	0.37	19	2	13	4	27	26	5	10	6	12	3	7	11	21	1	6	0	2	1	2
2022-03-17	tianjin	116	112	4	win	24	44	20	0.545	18	45	27	0.4	14	18	4	0.778	6	14	8	0.429	34	73	39	0.466	11	25	0.625	0.25	18	7	9	5	26	21	5	8	3	15	1	4	7	16	4	7	0	0	3	7
2022-03-17	sichuan	110	106	4	win	36	59	23	0.61	5	24	19	0.208	23	27	4	0.852	1	10	9	0.1	35	68	33	0.515	8	31	0.775	0.205	32	5	11	4	13	24	5	7	2	10	0	3	3	6	7	13	9	19	0	0
2022-03-17	shenzhen	114	120	-6	lose	29	51	22	0.569	12	32	20	0.375	20	33	13	0.606	2	6	4	0.333	36	74	38	0.486	9	31	0.738	0.214	25	2	9	4	19	27	2	7	8	17	2	7	5	11	2	8	5	9	1	3
2022-03-17	shandong	113	102	11	win	22	38	16	0.579	14	32	18	0.438	27	33	6	0.818	7	8	1	0.875	26	59	33	0.441	6	31	0.795	0.182	23	9	16	2	20	31	9	15	9	20	4	5	4	6	2	4	2	4	1	4
2022-03-17	qingdao	80	98	-18	lose	22	43	21	0.512	9	33	24	0.273	9	11	2	0.818	3	15	12	0.2	25	58	33	0.431	13	26	0.634	0.295	24	4	14	2	19	14	4	10	5	20	3	6	5	8	1	3	3	5	2	2
2022-03-17	nanjing	106	110	-4	lose	30	58	28	0.517	14	31	17	0.452	4	6	2	0.667	9	20	11	0.45	34	68	34	0.5	9	31	0.795	0.225	31	8	13	4	24	13	10	14	6	18	4	4	4	9	4	7	0	0	0	3
2022-03-17	jilin	98	80	18	win	26	49	23	0.531	11	35	24	0.314	13	18	5	0.722	3	11	8	0.273	33	72	39	0.458	15	31	0.705	0.366	22	7	9	0	14	19	5	5	9	17	1	4	7	11	0	2	1	2	6	12
2022-03-17	guangzhou	120	114	6	win	37	55	18	0.673	10	35	25	0.286	16	24	8	0.667	6	8	2	0.75	39	80	41	0.488	11	33	0.786	0.262	27	4	5	2	27	19	6	12	9	18	10	15	13	19	3	5	1	3	2	6
2022-03-17	guangsha	104	101	3	win	34	62	28	0.548	5	17	12	0.294	21	30	9	0.7	1	3	2	0.333	35	73	38	0.479	12	29	0.63	0.316	23	5	8	4	26	27	6	9	3	7	1	3	5	13	2	4	1	6	1	2
2022-03-17	fujian	102	113	-11	lose	32	56	24	0.571	7	25	18	0.28	17	22	5	0.773	3	6	3	0.5	32	71	39	0.451	8	27	0.818	0.205	23	10	15	2	31	20	4	10	4	14	4	5	6	15	2	3	3	3	0	3
2022-03-17	beikong	112	116	-4	lose	33	61	28	0.541	9	27	18	0.333	19	28	9	0.679	1	13	12	0.077	36	70	34	0.514	15	33	0.75	0.375	24	5	13	3	21	26	6	9	4	11	3	7	6	8	4	8	9	11	4	6
2021-03-18	zhejiang	103	99	4	win	29	60	31	0.483	10	34	24	0.294	15	19	4	0.789	3	8	5	0.375	29	79	50	0.367	13	25	0.658	0.245	20	10	11	6	31	21	11	15	8	17	2	6	5	12	4	8	0	1	1	1
2021-03-18	xinjiang	119	88	31	win	29	42	13	0.69	16	39	23	0.41	13	21	8	0.619	11	20	9	0.55	31	58	27	0.534	14	33	0.868	0.4	31	8	15	5	26	25	9	11	14	28	5	8	10	12	3	5	2	4	1	2
2021-03-18	tianjin	93	134	-41	lose	18	36	18	0.5	15	50	35	0.3	12	17	5	0.706	13	36	23	0.361	19	49	30	0.388	10	20	0.556	0.189	23	8	13	2	23	20	2	9	9	31	3	9	4	9	2	6	2	2	1	3
2021-03-18	sichuan	99	103	-4	lose	31	60	29	0.517	5	14	9	0.357	22	29	7	0.759	1	2	1	0.5	32	69	37	0.464	13	40	0.755	0.342	24	5	23	5	21	31	5	9	2	6	3	6	9	11	0	3	9	14	0	1
2021-03-18	shanxi	119	135	-16	lose	30	54	24	0.556	9	28	19	0.321	32	37	5	0.865	6	23	17	0.261	32	58	26	0.552	15	23	0.657	0.366	24	8	18	6	23	26	9	14	7	20	6	12	5	12	1	3	3	4	0	4
2021-03-18	shanghai	94	104	-10	lose	23	48	25	0.479	8	26	18	0.308	24	36	12	0.667	6	20	14	0.3	24	53	29	0.453	15	20	0.69	0.366	13	9	13	0	18	28	4	9	2	9	4	8	8	16	0	2	2	5	1	6
2021-03-18	qingdao	134	93	41	win	45	68	23	0.662	7	24	17	0.292	23	28	5	0.821	0	10	10	0	46	76	30	0.605	16	43	0.811	0.444	24	8	12	4	20	23	14	24	4	12	4	8	15	21	0	2	4	8	4	7
2021-03-18	jiangsu	88	119	-31	lose	24	56	32	0.429	7	16	9	0.438	19	24	5	0.792	3	8	5	0.375	26	62	36	0.419	5	21	0.6	0.132	17	6	17	0	25	26	1	3	3	8	1	4	8	19	2	3	3	9	3	9
2021-03-18	fujian	135	119	16	win	35	57	22	0.614	13	29	16	0.448	26	31	5	0.839	11	16	5	0.688	34	67	33	0.507	12	26	0.634	0.343	27	10	15	1	26	23	9	15	5	14	6	10	4	7	2	4	1	2	2	7
2021-03-18	beijing	104	94	10	win	29	42	13	0.69	11	29	18	0.379	13	17	4	0.765	14	29	15	0.483	25	41	16	0.61	9	26	0.634	0.31	27	7	18	2	28	18	8	12	4	11	2	5	6	12	6	9	1	2	0	1
2022-03-18	xinjiang	111	100	11	win	36	62	26	0.581	4	13	9	0.308	27	34	7	0.794	3	12	9	0.25	33	59	26	0.559	10	28	0.8	0.294	33	5	13	3	18	28	4	6	3	10	7	13	8	14	3	5	4	11	1	4
2022-03-18	shanxi	114	84	30	win	28	49	21	0.571	11	33	22	0.333	25	30	5	0.833	2	4	2	0.5	33	74	41	0.446	14	24	0.727	0.333	31	14	12	2	24	25	3	8	5	12	6	13	8	15	4	8	3	4	5	9
2022-03-18	shanghai	101	121	-20	lose	24	46	22	0.522	9	29	20	0.31	26	32	6	0.813	4	10	6	0.4	24	60	36	0.4	10	20	0.556	0.256	22	5	16	2	26	26	5	9	6	16	2	6	7	14	2	2	2	3	2	8
2022-03-18	ningbo	80	106	-26	lose	27	48	21	0.563	6	34	28	0.176	8	14	6	0.571	4	14	10	0.286	27	66	39	0.409	8	35	0.897	0.186	24	8	20	2	26	18	5	11	7	27	3	6	2	7	0	2	0	0	1	4
2022-03-18	liaoning	121	101	20	win	33	53	20	0.623	10	30	20	0.333	25	32	7	0.781	5	10	5	0.5	36	71	35	0.507	16	29	0.744	0.444	26	7	16	2	26	25	5	8	7	16	3	8	6	11	1	2	2	2	1	4
2022-03-18	jiangsu	84	114	-30	lose	19	37	18	0.514	10	25	15	0.4	16	20	4	0.8	4	7	3	0.571	24	54	30	0.444	9	28	0.667	0.273	25	7	29	4	25	24	6	8	8	17	1	6	3	12	1	4	1	1	1	2
2022-03-18	guangdong	106	80	26	win	25	43	18	0.581	11	30	19	0.367	23	34	11	0.676	4	11	7	0.364	28	58	30	0.483	4	35	0.814	0.103	28	10	12	1	18	26	5	9	4	11	0	2	4	11	4	5	1	1	2	7
2022-03-18	beijing	100	111	-11	lose	30	51	21	0.588	9	28	19	0.321	13	18	5	0.722	4	9	5	0.444	35	70	35	0.5	7	24	0.706	0.2	22	8	12	2	28	18	6	6	3	7	3	6	9	14	4	8	5	9	1	5
2022-03-19	zhejiang	115	100	15	win	29	59	30	0.492	10	22	12	0.455	27	31	4	0.871	3	6	3	0.5	31	70	39	0.443	14	32	0.711	0.389	24	11	16	9	21	28	12	18	5	10	7	11	7	11	0	2	2	5	1	2
2022-03-19	shenzhen	107	126	-19	lose	31	59	28	0.525	11	34	23	0.324	12	18	6	0.667	3	7	4	0.429	35	82	47	0.427	14	28	0.651	0.292	21	11	15	1	19	18	4	13	3	13	4	9	10	20	3	5	3	6	4	8
2022-03-19	qingdao	104	82	22	win	29	46	17	0.63	7	31	24	0.226	25	31	6	0.806	1	8	7	0.125	30	64	34	0.469	5	38	0.776	0.135	29	8	9	6	20	28	9	9	6	26	3	8	5	10	1	4	2	4	0	0
2022-03-19	nanjing	82	104	-22	lose	27	65	38	0.415	4	16	12	0.25	16	24	8	0.667	2	7	5	0.286	26	71	45	0.366	11	32	0.865	0.224	19	5	13	1	28	20	2	6	2	10	3	6	5	10	3	4	2	2	1	2
2022-03-19	jilin	100	115	-15	lose	30	59	29	0.508	7	24	17	0.292	19	25	6	0.76	2	5	3	0.4	33	76	43	0.434	13	22	0.611	0.289	17	14	14	6	28	21	4	12	3	7	0	4	8	15	1	3	1	4	5	13
2022-03-19	guangzhou	98	75	23	win	27	54	27	0.5	9	27	18	0.333	17	24	7	0.708	9	26	17	0.346	24	52	28	0.462	14	47	0.922	0.326	24	8	16	5	19	25	8	13	8	21	2	7	3	9	1	3	2	5	1	3
2022-03-19	fujian	75	98	-23	lose	16	49	33	0.327	11	31	20	0.355	10	12	2	0.833	10	24	14	0.417	16	55	39	0.291	4	29	0.674	0.078	18	7	13	2	25	19	2	4	8	20	5	12	2	12	4	9	1	3	2	9
2022-03-19	beikong	126	107	19	win	39	58	19	0.672	11	34	23	0.324	15	21	6	0.714	4	11	7	0.364	42	77	35	0.545	15	34	0.708	0.349	30	8	14	5	18	19	13	16	2	19	6	10	8	12	2	4	1	3	5	8
2022-03-20	xinjiang	99	118	-19	lose	24	50	26	0.48	9	25	16	0.36	24	29	5	0.828	4	11	7	0.364	27	62	35	0.435	10	29	0.707	0.286	30	9	20	3	18	19	7	10	10	19	2	6	3	8	1	4	1	6	1	5
2022-03-20	tianjin	113	98	15	win	25	51	26	0.49	15	32	17	0.469	18	24	6	0.75	1	7	6	0.143	37	74	37	0.5	15	25	0.625	0.357	27	6	6	4	21	26	2	5	3	10	1	6	4	8	6	8	3	5	7	12
2022-03-20	sichuan	101	119	-18	lose	27	44	17	0.614	10	31	21	0.323	17	24	7	0.708	7	15	8	0.467	28	58	30	0.483	7	29	0.744	0.184	25	9	18	4	19	21	9	12	5	14	3	7	7	11	3	5	3	6	2	4
2022-03-20	shanxi	119	101	18	win	35	66	31	0.53	12	24	12	0.5	13	13	0	1	5	6	1	0.833	40	82	42	0.488	10	31	0.816	0.256	31	9	13	1	21	19	8	9	9	17	3	5	6	10	3	5	2	6	3	5
2022-03-20	shanghai	80	122	-42	lose	20	53	33	0.377	8	19	11	0.421	16	21	5	0.762	3	8	5	0.375	22	61	39	0.361	8	16	0.5	0.17	18	10	17	1	20	20	7	10	5	12	2	7	6	12	3	11	0	0	1	5
2022-03-20	shandong	96	89	7	win	24	47	23	0.511	10	30	20	0.333	18	24	6	0.75	1	9	8	0.111	30	65	35	0.462	14	26	0.634	0.333	27	7	14	4	21	19	5	5	5	21	0	4	1	5	4	6	4	7	1	5
2022-03-20	ningbo	98	113	-15	lose	27	56	29	0.482	12	32	20	0.375	8	11	3	0.727	0	2	2	0	36	83	47	0.434	15	27	0.643	0.375	27	4	12	0	26	21	5	8	7	24	2	5	3	7	2	4	3	8	0	2
2022-03-20	liaoning	108	95	13	win	24	40	16	0.6	13	29	16	0.448	21	27	6	0.778	2	2	0	1	32	64	32	0.5	5	25	0.758	0.185	24	16	24	5	28	26	11	12	7	15	2	6	3	11	2	4	0	2	2	9
2022-03-20	jiangsu	95	108	-13	lose	26	48	22	0.542	8	20	12	0.4	19	24	5	0.792	0	2	2	0	32	64	32	0.5	8	22	0.815	0.242	22	12	28	2	26	28	5	6	4	11	7	12	7	19	0	2	2	6	3	6
2022-03-20	guangsha	122	80	42	win	35	49	14	0.714	11	28	17	0.393	19	23	4	0.826	6	8	2	0.75	37	66	29	0.561	16	39	0.83	0.5	29	11	20	2	20	20	9	10	6	20	4	4	3	6	3	5	6	6	2	4
2022-03-20	guangdong	118	99	19	win	36	64	28	0.563	12	26	14	0.462	10	13	3	0.769	6	9	3	0.667	41	80	39	0.513	12	25	0.714	0.293	28	15	15	2	19	18	8	14	9	13	5	6	4	10	1	5	2	4	1	5
2022-03-20	beijing	89	96	-7	lose	33	64	31	0.516	3	16	13	0.188	14	17	3	0.824	1	9	8	0.111	32	68	36	0.471	15	28	0.667	0.366	21	8	13	1	19	21	11	16	1	7	0	4	6	11	1	9	2	3	0	1
2022-03-21	zhejiang	127	78	49	win	34	50	16	0.68	14	27	13	0.519	17	23	6	0.739	2	2	0	1	41	70	29	0.586	9	36	0.735	0.29	31	9	15	10	13	20	16	20	4	7	3	6	5	7	3	6	1	3	0	0
2022-03-21	shenzhen	119	104	15	win	26	47	21	0.553	17	38	21	0.447	16	26	10	0.615	8	15	7	0.533	33	68	35	0.485	8	33	0.805	0.2	29	8	7	2	16	21	17	26	8	25	3	6	1	5	2	3	3	6	2	6
2022-03-21	qingdao	100	120	-20	lose	32	55	23	0.582	7	27	20	0.259	15	25	10	0.6	4	18	14	0.222	31	60	29	0.517	9	34	0.829	0.214	29	4	13	4	19	22	9	19	1	10	8	9	8	9	3	4	6	7	1	3
2022-03-21	nanjing	78	127	-49	lose	27	63	36	0.429	6	26	20	0.231	6	10	4	0.6	2	10	8	0.2	31	79	48	0.392	13	22	0.71	0.265	22	9	15	1	20	13	5	9	7	20	4	7	3	6	2	6	3	6	0	2
2022-03-21	jilin	120	100	20	win	25	42	17	0.595	17	43	26	0.395	19	20	1	0.95	9	20	11	0.45	29	61	32	0.475	7	33	0.786	0.171	33	6	9	4	22	19	8	13	11	24	3	6	6	10	2	7	0	0	2	3
2022-03-21	guangzhou	104	119	-15	lose	30	50	20	0.6	11	32	21	0.344	11	18	7	0.611	11	21	10	0.524	27	58	31	0.466	8	32	0.8	0.195	20	3	12	4	21	16	5	6	6	18	3	6	6	12	2	4	1	5	0	2
2022-03-21	fujian	92	109	-17	lose	22	48	26	0.458	13	32	19	0.406	9	13	4	0.692	4	9	5	0.444	31	71	40	0.437	8	19	0.576	0.195	21	11	17	1	20	16	9	15	7	13	3	12	5	16	3	8	0	1	3	3
2022-03-21	beikong	109	92	17	win	31	52	21	0.596	10	26	16	0.385	17	20	3	0.85	3	4	1	0.75	36	72	36	0.5	14	33	0.805	0.424	26	9	22	5	16	20	8	17	6	16	1	4	9	15	4	8	1	2	4	6
2022-03-22	xinjiang	124	119	5	win	31	60	29	0.517	10	23	13	0.435	32	36	4	0.889	5	18	13	0.278	35	64	29	0.547	15	19	0.655	0.395	32	8	12	1	25	24	6	10	7	20	3	9	2	7	2	4	6	11	1	2
2022-03-22	tianjin	119	124	-5	lose	26	41	15	0.634	17	40	23	0.425	16	22	6	0.727	5	8	3	0.625	37	72	35	0.514	10	23	0.605	0.345	21	5	17	1	24	25	4	6	5	16	1	4	8	14	8	10	2	2	3	10
2022-03-22	sichuan	90	134	-44	lose	25	59	34	0.424	9	20	11	0.45	13	18	5	0.722	6	12	6	0.5	26	65	39	0.4	11	23	0.575	0.25	31	7	23	3	23	23	5	12	6	12	3	8	5	14	4	8	3	8	1	2
2022-03-22	shanxi	151	128	23	win	39	58	19	0.672	19	35	16	0.543	16	24	8	0.667	7	9	2	0.778	45	78	33	0.577	14	37	0.787	0.412	28	5	10	5	26	30	7	12	12	21	3	4	9	14	1	3	3	6	10	13
2022-03-22	shanghai	128	151	-23	lose	34	59	25	0.576	11	30	19	0.367	27	32	5	0.844	4	11	7	0.364	38	75	37	0.507	10	20	0.588	0.213	27	4	8	2	30	26	6	12	7	17	9	14	9	19	1	10	4	4	2	4
2022-03-22	ningbo	84	118	-34	lose	25	51	26	0.49	8	30	22	0.267	10	14	4	0.714	1	1	0	1	32	80	48	0.4	10	27	0.818	0.233	31	8	15	0	18	18	5	9	7	22	8	14	4	5	1	3	2	3	1	3
2022-03-22	liaoning	134	90	44	win	45	67	22	0.672	9	25	16	0.36	17	33	16	0.515	4	11	7	0.364	47	78	31	0.603	17	33	0.75	0.425	34	16	12	5	23	23	15	20	4	11	0	1	4	9	4	8	6	13	3	5
2022-03-22	jiangsu	80	97	-17	lose	31	62	31	0.5	3	16	13	0.188	9	9	0	1	2	5	3	0.4	29	70	41	0.414	9	18	0.692	0.225	18	7	14	6	22	19	7	8	5	12	1	2	6	17	1	3	2	3	4	11
2022-03-22	guangsha	97	80	17	win	20	35	15	0.571	14	30	16	0.467	15	17	2	0.882	2	3	1	0.667	31	61	30	0.508	8	31	0.775	0.308	27	9	19	2	19	22	4	5	7	14	5	8	4	9	5	9	1	2	1	7
2022-03-22	beijing	118	84	34	win	35	53	18	0.66	13	26	13	0.5	9	15	6	0.6	2	4	2	0.5	41	70	29	0.586	6	33	0.767	0.182	37	11	13	3	18	18	10	14	8	14	1	5	4	8	1	5	4	8	1	2
2021-03-24	nanjing	109	124	-15	lose	28	52	24	0.538	10	29	19	0.345	23	28	5	0.821	9	22	13	0.409	24	54	30	0.444	9	28	0.848	0.265	29	3	16	1	18	27	6	15	7	18	4	9	6	12	2	4	3	5	1	5
2021-03-24	guangzhou	124	109	15	win	26	44	18	0.591	17	31	14	0.548	21	28	7	0.75	13	28	15	0.464	29	46	17	0.63	5	25	0.735	0.152	28	7	11	5	27	18	4	9	11	18	3	5	7	12	1	5	7	9	0	1
2021-03-24	guangdong	94	89	5	win	25	44	19	0.568	7	23	16	0.304	23	30	7	0.767	5	15	10	0.333	24	49	25	0.49	8	29	0.707	0.222	16	5	15	5	26	31	5	10	5	12	1	4	6	10	2	4	4	7	1	7
2021-03-24	beijing	89	94	-5	lose	17	44	27	0.386	13	31	18	0.419	16	23	7	0.696	9	21	12	0.429	20	53	33	0.377	12	28	0.778	0.293	17	8	17	3	31	26	1	3	9	21	1	8	5	14	1	2	0	2	1	2
2021-03-25	zhejiang	100	90	10	win	21	49	28	0.429	10	35	25	0.286	28	36	8	0.778	7	24	17	0.292	22	58	36	0.379	15	26	0.65	0.375	16	14	16	7	26	27	7	11	2	9	2	5	7	20	0	6	0	1	1	6
2021-03-25	xinjiang	129	106	23	win	34	58	24	0.586	18	30	12	0.6	7	18	11	0.389	23	38	15	0.605	29	50	21	0.58	12	21	0.677	0.364	35	15	19	5	31	23	13	15	10	17	0	2	4	9	4	7	5	10	0	0
2021-03-25	sichuan	94	80	14	win	24	55	31	0.436	7	24	17	0.292	25	32	7	0.781	3	12	9	0.25	24	63	39	0.381	21	32	0.842	0.467	16	5	17	4	20	27	2	5	4	14	1	5	1	8	1	6	5	13	0	1
2021-03-25	shenzhen	113	93	20	win	33	45	12	0.733	12	36	24	0.333	11	16	5	0.688	8	11	3	0.727	35	68	33	0.515	8	27	0.6	0.229	30	6	9	4	28	15	5	8	7	23	3	5	8	11	1	1	4	4	2	3
2021-03-25	shanxi	80	94	-14	lose	27	51	24	0.529	4	23	19	0.174	14	21	7	0.667	7	23	16	0.304	24	51	27	0.471	6	24	0.533	0.158	21	9	11	4	27	20	6	8	5	18	2	4	7	11	1	1	0	1	3	4
2021-03-25	shanghai	93	113	-20	lose	29	57	28	0.509	4	24	20	0.167	23	30	7	0.767	3	8	5	0.375	26	69	43	0.377	18	27	0.771	0.4	16	2	13	2	15	28	1	4	2	11	5	9	10	21	3	6	1	1	2	3
2021-03-25	qingdao	106	129	-23	lose	25	49	24	0.51	12	25	13	0.48	20	32	12	0.625	9	19	10	0.474	23	50	27	0.46	10	21	0.636	0.323	24	11	28	5	23	31	8	17	8	15	5	13	7	20	1	3	2	2	1	3
2021-03-25	guangsha	90	100	-10	lose	24	50	26	0.48	8	24	16	0.333	18	24	6	0.75	9	28	19	0.321	19	42	23	0.452	14	25	0.625	0.35	21	7	27	9	27	26	4	7	5	14	2	6	5	12	4	5	0	4	0	1
2019-03-26	xinjiang	134	100	34	win	29	45	16	0.644	17	32	15	0.531	25	33	8	0.758	5	8	3	0.625	38	66	28	0.576	9	30	0.811	0.321	22	6	10	0	25	25	8	15	12	24	6	10	10	14	0	0	7	8	2	2
2021-03-26	shandong	94	85	9	win	28	63	35	0.444	6	26	20	0.231	20	30	10	0.667	2	7	5	0.286	29	79	50	0.367	18	38	0.809	0.36	21	13	17	1	25	21	8	12	3	11	3	13	5	17	2	5	3	5	1	7
2021-03-26	liaoning	100	83	17	win	29	55	26	0.527	11	21	10	0.524	9	10	1	0.9	14	28	14	0.5	23	45	22	0.511	12	36	0.837	0.444	24	7	20	2	22	16	5	7	6	12	3	8	5	11	5	8	2	3	4	4
2021-03-26	jilin	83	100	-17	lose	23	47	24	0.489	6	27	21	0.222	19	24	5	0.792	9	24	15	0.375	16	46	30	0.348	7	15	0.556	0.163	15	8	11	6	16	22	4	11	3	14	4	9	8	15	2	6	2	2	1	5
2021-03-26	beikong	85	94	-9	lose	21	46	25	0.457	10	30	20	0.333	13	22	9	0.591	5	12	7	0.417	24	62	38	0.387	9	32	0.64	0.191	21	9	21	7	21	25	7	11	9	16	2	7	7	13	2	6	2	7	1	3
2021-03-27	zhejiang	121	107	14	win	25	50	25	0.5	16	39	23	0.41	23	30	7	0.767	18	40	22	0.45	20	46	26	0.435	17	27	0.73	0.321	27	7	12	4	28	25	13	16	4	18	2	5	3	7	6	10	0	2	1	1
2021-03-27	sichuan	86	96	-10	lose	22	44	22	0.5	5	15	10	0.333	27	36	9	0.75	2	5	3	0.4	23	52	29	0.442	6	32	0.615	0.176	11	2	19	5	26	33	6	9	2	10	0	3	7	14	1	1	4	7	2	6
2021-03-27	shenzhen	99	103	-4	lose	34	62	28	0.548	4	25	21	0.16	19	26	7	0.731	1	14	13	0.071	33	69	36	0.478	14	30	0.811	0.298	15	5	12	5	25	21	6	10	5	21	2	6	10	17	0	1	0	2	3	6
2021-03-27	shanxi	91	119	-28	lose	25	46	21	0.543	9	25	16	0.36	14	18	4	0.778	8	21	13	0.381	25	49	24	0.51	8	28	0.7	0.242	22	8	29	4	28	19	6	15	9	14	7	12	4	5	0	1	2	4	0	3
2021-03-27	guangsha	103	99	4	win	29	58	29	0.5	11	22	11	0.5	12	18	6	0.667	12	18	6	0.667	23	57	34	0.404	7	33	0.702	0.189	24	5	14	3	21	25	8	12	6	10	2	5	4	10	2	4	4	8	1	4
2021-03-27	guangdong	119	91	28	win	31	56	25	0.554	12	31	19	0.387	21	27	6	0.778	12	31	19	0.387	29	54	25	0.537	12	25	0.758	0.3	20	15	14	6	19	28	8	14	7	20	0	4	5	9	2	3	2	3	3	5
2021-03-27	fujian	107	121	-14	lose	34	64	30	0.531	8	21	13	0.381	15	25	10	0.6	7	19	12	0.368	30	61	31	0.492	10	36	0.679	0.27	23	6	19	3	25	28	12	22	3	8	4	14	8	17	2	4	1	5	1	5
2021-03-27	beijing	96	86	10	win	17	42	25	0.405	13	40	27	0.325	23	29	6	0.793	7	26	19	0.269	23	56	33	0.411	20	28	0.824	0.385	21	5	11	3	33	26	5	6	9	27	2	5	1	8	1	5	0	1	1	2
2021-03-28	xinjiang	106	112	-6	lose	27	49	22	0.551	12	40	28	0.3	16	25	9	0.64	13	43	30	0.302	24	44	20	0.545	16	29	0.69	0.34	28	10	16	1	27	23	4	7	11	33	1	6	2	7	2	4	7	11	0	1
2021-03-28	shandong	112	106	6	win	28	46	18	0.609	11	31	20	0.355	23	32	9	0.719	7	16	9	0.438	29	58	29	0.5	13	31	0.66	0.31	24	8	20	3	23	27	6	10	7	18	5	8	6	8	3	4	1	1	2	5
2021-03-28	qingdao	107	99	8	win	32	48	16	0.667	8	32	24	0.25	19	25	6	0.76	6	23	17	0.261	29	52	23	0.558	11	32	0.696	0.282	22	6	15	3	25	23	10	20	7	21	4	6	7	14	1	2	8	9	2	6
2021-03-28	nanjing	105	93	12	win	22	48	26	0.458	10	29	19	0.345	31	43	12	0.721	0	6	6	0	29	68	39	0.426	18	37	0.787	0.409	25	4	22	4	29	33	8	11	5	13	0	5	2	7	1	5	4	9	1	3
2021-03-28	liaoning	91	85	6	win	20	44	24	0.455	10	24	14	0.417	21	25	4	0.84	10	17	7	0.588	19	50	31	0.38	9	33	0.825	0.25	21	4	10	2	21	17	3	6	3	10	3	8	1	8	6	7	2	7	0	1
2021-03-28	jilin	99	107	-8	lose	35	62	27	0.565	6	31	25	0.194	11	18	7	0.611	6	23	17	0.261	31	66	35	0.47	14	28	0.718	0.304	18	6	16	1	23	25	12	15	2	14	1	6	6	15	2	5	1	1	4	10
2021-03-28	jiangsu	93	105	-12	lose	24	48	24	0.5	7	34	27	0.206	24	40	16	0.6	2	6	4	0.333	26	73	47	0.356	10	26	0.591	0.213	18	2	13	2	33	29	9	16	1	12	3	5	8	21	5	10	0	2	4	7
2021-03-28	beikong	85	91	-6	lose	25	47	22	0.532	9	29	20	0.31	8	16	8	0.5	10	23	13	0.435	23	52	29	0.442	7	27	0.75	0.175	19	3	11	3	17	21	6	9	4	16	5	14	5	12	3	5	0	1	3	6
2021-03-29	zhejiang	119	125	-6	lose	25	43	18	0.581	14	45	31	0.311	27	43	16	0.628	13	33	20	0.394	20	49	29	0.408	15	28	0.757	0.333	23	12	16	4	31	33	11	19	9	20	3	4	8	13	1	9	0	0	0	2
2021-03-29	shenzhen	102	114	-12	lose	30	54	24	0.556	11	35	24	0.314	9	13	4	0.692	12	38	26	0.316	28	50	22	0.56	7	31	0.646	0.146	25	9	11	1	21	19	13	18	7	16	1	2	5	14	1	8	1	1	1	3
2021-03-29	shanxi	93	103	-10	lose	31	54	23	0.574	7	20	13	0.35	10	19	9	0.526	2	5	3	0.4	29	62	33	0.468	11	23	0.697	0.297	20	13	26	5	20	22	3	8	3	10	8	12	12	20	2	3	2	4	1	2
2021-03-29	shanghai	103	93	10	win	32	50	18	0.64	8	26	18	0.308	15	19	4	0.789	4	11	7	0.364	32	61	29	0.525	10	26	0.703	0.303	13	15	23	5	22	20	7	11	4	12	6	9	10	17	0	2	0	1	1	2
2021-03-29	guangsha	116	93	23	win	30	53	23	0.566	11	24	13	0.458	23	27	4	0.852	12	21	9	0.571	28	55	27	0.509	11	37	0.74	0.324	22	5	16	4	24	23	8	12	8	18	1	3	5	10	0	1	2	5	0	2
2021-03-29	guangdong	125	119	6	win	33	57	24	0.579	10	22	12	0.455	29	40	11	0.725	8	16	8	0.5	33	61	28	0.541	9	30	0.667	0.243	26	9	16	3	33	31	9	18	7	12	3	4	9	15	1	5	1	5	0	0
2021-03-29	fujian	114	102	12	win	31	60	29	0.517	13	34	21	0.382	13	20	7	0.65	12	27	15	0.444	26	61	35	0.426	17	41	0.854	0.354	19	4	14	1	19	21	3	11	3	12	5	7	9	16	6	9	1	1	1	1
2021-03-29	beijing	93	116	-23	lose	25	60	35	0.417	8	26	18	0.308	19	23	4	0.826	6	20	14	0.3	25	64	39	0.391	13	23	0.676	0.26	17	11	11	2	23	24	8	11	6	17	2	7	6	17	1	4	0	5	2	5
2021-03-30	xinjiang	89	83	6	win	27	55	28	0.491	7	27	20	0.259	14	32	18	0.438	5	17	12	0.294	26	62	36	0.419	15	38	0.844	0.294	20	5	10	4	20	27	8	15	5	19	3	11	2	7	0	2	3	8	0	4
2021-03-30	tianjin	98	115	-17	lose	22	41	19	0.537	10	34	24	0.294	24	34	10	0.706	1	5	4	0.2	26	65	39	0.4	8	19	0.594	0.195	20	6	16	4	30	31	7	11	6	20	2	4	3	5	0	2	3	9	2	4
2021-03-30	shandong	115	98	17	win	32	51	19	0.627	7	22	15	0.318	30	40	10	0.75	1	2	1	0.5	32	65	33	0.492	13	33	0.805	0.406	28	10	16	2	31	30	13	17	5	11	3	11	6	14	0	1	2	4	2	3
2021-03-30	qingdao	145	111	34	win	32	46	14	0.696	15	32	17	0.469	36	49	13	0.735	10	14	4	0.714	32	59	27	0.542	8	34	0.872	0.242	27	9	10	2	22	34	15	18	7	17	4	8	9	15	1	2	3	5	2	2
2021-03-30	nanjing	111	145	-34	lose	32	55	23	0.582	11	27	16	0.407	14	17	3	0.824	8	15	7	0.533	33	65	32	0.508	5	25	0.758	0.128	36	4	16	0	34	22	6	8	12	26	5	11	4	9	1	1	3	6	0	0
2021-03-30	liaoning	83	89	-6	lose	20	44	24	0.455	8	33	25	0.242	19	25	6	0.76	9	15	6	0.6	15	58	43	0.259	7	36	0.706	0.156	14	4	11	1	27	20	6	9	2	12	1	4	5	15	6	12	2	4	3	9
2021-03-30	jilin	120	95	25	win	28	46	18	0.609	14	39	25	0.359	22	28	6	0.786	12	26	14	0.462	24	53	29	0.453	12	29	0.659	0.324	34	10	7	3	19	21	11	16	11	27	1	3	2	6	3	3	0	2	3	11
2021-03-30	jiangsu	80	105	-25	lose	25	49	24	0.51	5	30	25	0.167	15	25	10	0.6	6	29	23	0.207	20	46	26	0.435	9	31	0.738	0.2	21	3	16	7	30	22	5	9	2	10	1	4	8	20	4	9	3	4	2	4
2021-03-30	guangzhou	95	120	-25	lose	30	44	14	0.682	7	36	29	0.194	14	19	5	0.737	5	19	14	0.263	31	60	29	0.517	15	25	0.676	0.341	18	5	17	0	21	19	7	12	5	19	3	7	6	8	0	3	2	5	0	0
2021-03-30	beikong	105	80	25	win	26	46	20	0.565	6	25	19	0.24	35	42	7	0.833	6	22	16	0.273	24	47	23	0.511	11	36	0.8	0.262	16	8	15	3	22	30	7	14	4	11	2	6	7	15	2	4	1	1	2	5
2021-03-31	shanxi	74	96	-22	lose	26	51	25	0.51	4	15	11	0.267	10	17	7	0.588	4	12	8	0.333	22	50	28	0.44	8	26	0.667	0.211	14	6	21	3	18	19	4	4	3	11	2	5	8	18	0	2	4	7	0	0
2021-03-31	guangsha	96	74	22	win	28	53	25	0.528	9	28	19	0.321	13	16	3	0.813	11	31	20	0.355	24	48	24	0.5	13	30	0.789	0.333	26	12	12	3	19	18	6	11	8	20	1	4	7	10	4	8	4	10	1	1
2021-04-01	zhejiang	85	80	5	win	28	63	35	0.444	5	24	19	0.208	14	14	0	1	8	21	13	0.381	25	66	41	0.379	18	30	0.811	0.391	18	5	14	5	21	21	6	12	8	15	0	1	10	21	1	7	2	2	1	7
2021-04-01	xinjiang	110	93	17	win	25	45	20	0.556	14	39	25	0.359	18	23	5	0.783	5	11	6	0.455	33	72	39	0.458	17	30	0.75	0.447	28	8	17	8	22	20	8	15	7	28	3	10	1	8	1	1	3	6	0	1
2021-04-01	shanghai	80	85	-5	lose	25	54	29	0.463	4	14	10	0.286	18	24	6	0.75	4	17	13	0.235	22	48	26	0.458	7	28	0.609	0.189	21	9	18	6	21	21	3	8	2	8	0	4	3	13	2	8	3	5	0	3
2021-04-01	shandong	124	98	26	win	26	46	20	0.565	14	31	17	0.452	30	38	8	0.789	9	20	11	0.45	26	52	26	0.5	11	35	0.745	0.282	22	10	13	3	25	26	9	13	10	13	3	5	10	21	0	0	2	3	4	12
2021-04-01	nanjing	98	124	-26	lose	34	67	33	0.507	4	17	13	0.235	18	26	8	0.692	4	14	10	0.286	31	67	36	0.463	12	28	0.718	0.255	16	5	16	2	26	25	7	13	4	14	2	6	6	15	2	6	8	14	3	6
2021-04-01	guangzhou	93	110	-17	lose	23	47	24	0.489	12	35	23	0.343	11	15	4	0.733	3	6	3	0.5	31	75	44	0.413	10	21	0.553	0.25	15	9	16	3	20	22	8	14	6	22	1	4	5	15	0	1	0	0	2	6
2021-04-01	fujian	90	99	-9	lose	25	46	21	0.543	8	29	21	0.276	16	21	5	0.762	10	19	9	0.526	18	51	33	0.353	7	30	0.789	0.179	19	4	11	3	19	23	5	8	6	17	2	8	8	15	4	6	3	4	6	13
2021-04-01	beijing	99	90	9	win	20	39	19	0.513	16	38	22	0.421	11	15	4	0.733	7	26	19	0.269	28	50	22	0.56	8	32	0.821	0.211	26	3	12	1	23	19	2	4	11	31	3	8	5	10	2	5	1	1	1	3
2021-04-02	tianjin	88	108	-20	lose	18	37	19	0.486	11	31	20	0.355	19	23	4	0.826	6	17	11	0.353	23	51	28	0.451	6	21	0.724	0.171	17	11	18	1	27	22	8	14	7	18	1	8	4	11	3	5	1	5	2	5
2021-04-02	qingdao	108	99	9	win	29	50	21	0.58	11	34	23	0.324	17	24	7	0.708	3	8	5	0.375	35	74	39	0.473	10	32	0.681	0.256	22	7	14	1	25	25	6	8	7	19	1	6	10	19	1	1	5	7	7	20
2021-04-02	liaoning	108	88	20	win	34	52	18	0.654	8	19	11	0.421	16	24	8	0.667	10	18	8	0.556	27	48	21	0.563	8	29	0.829	0.276	26	5	21	5	22	27	6	6	9	13	1	6	3	8	6	10	3	3	2	3
2021-04-02	jilin	111	94	17	win	28	44	16	0.636	13	44	31	0.295	16	22	6	0.727	3	3	0	1	34	81	47	0.42	10	28	0.875	0.227	20	10	7	2	15	21	6	10	8	21	3	5	8	14	2	5	2	5	6	14
2021-04-02	jiangsu	94	111	-17	lose	22	42	20	0.524	14	27	13	0.519	8	11	3	0.727	5	11	6	0.455	28	55	27	0.509	4	34	0.773	0.125	26	3	22	2	21	15	7	9	5	9	1	6	7	14	8	10	1	2	2	4
2021-04-02	beikong	99	108	-9	lose	23	49	26	0.469	11	30	19	0.367	20	25	5	0.8	9	21	12	0.429	23	56	33	0.411	15	29	0.744	0.319	18	8	16	9	25	25	6	13	2	11	1	3	3	4	2	4	4	7	1	5
2021-04-03	zhejiang	93	104	-11	lose	25	58	33	0.431	6	23	17	0.261	25	29	4	0.862	3	12	9	0.25	28	69	41	0.406	18	20	0.606	0.353	11	9	14	3	32	27	4	12	4	11	2	11	7	20	0	3	2	4	2	6
2021-04-03	sichuan	107	101	6	win	28	55	27	0.509	11	22	11	0.5	18	28	10	0.643	2	6	4	0.333	36	70	34	0.514	12	28	0.683	0.308	27	7	10	3	12	24	7	8	8	15	1	8	5	15	1	3	2	8	2	3
2021-04-03	shenzhen	95	114	-19	lose	15	39	24	0.385	13	36	23	0.361	26	38	12	0.684	10	18	8	0.556	16	55	39	0.291	11	30	0.652	0.229	13	5	19	6	28	31	4	9	5	22	4	10	4	11	0	0	1	2	2	6
2021-04-03	shanxi	101	107	-6	lose	22	50	28	0.44	17	34	17	0.5	6	10	4	0.6	7	12	5	0.583	31	71	40	0.437	13	27	0.692	0.317	29	2	13	2	24	12	5	10	8	17	1	8	5	12	1	2	1	2	2	4
2021-04-03	shanghai	96	103	-7	lose	26	47	21	0.553	12	25	13	0.48	8	14	6	0.571	5	11	6	0.455	31	59	28	0.525	10	24	0.727	0.303	20	11	16	1	25	25	4	7	5	14	7	11	8	15	2	5	0	0	2	5
2021-04-03	guangsha	104	93	11	win	31	56	25	0.554	5	14	9	0.357	27	34	7	0.794	4	7	3	0.571	29	60	31	0.483	13	33	0.647	0.394	20	7	21	4	27	32	10	15	3	11	3	5	8	12	1	2	1	2	2	5
2021-04-03	guangdong	114	95	19	win	25	56	31	0.446	12	28	16	0.429	28	34	6	0.824	9	16	7	0.563	22	62	40	0.355	16	37	0.771	0.348	21	13	16	2	31	28	9	15	9	19	3	4	5	12	1	5	2	5	0	5
2021-04-03	beijing	103	96	7	win	21	33	12	0.636	15	36	21	0.417	16	21	5	0.762	3	4	1	0.75	30	62	32	0.484	9	23	0.697	0.273	20	6	15	1	25	25	6	6	6	15	2	5	5	9	2	8	1	2	2	3
2021-04-04	xinjiang	112	98	14	win	32	49	17	0.653	8	34	26	0.235	24	33	9	0.727	5	11	6	0.455	30	67	37	0.448	14	34	0.829	0.359	26	10	12	6	21	28	7	8	6	21	2	5	9	11	1	4	6	13	1	1
2021-04-04	tianjin	115	122	-7	lose	27	49	22	0.551	15	32	17	0.469	16	20	4	0.8	14	31	17	0.452	26	48	22	0.542	10	28	0.737	0.303	35	10	25	2	29	25	12	15	11	26	6	11	6	10	1	1	1	2	0	0
2021-04-04	shandong	102	108	-6	lose	30	49	19	0.612	8	27	19	0.296	18	20	2	0.9	7	19	12	0.368	29	55	26	0.527	13	26	0.634	0.371	22	1	18	3	23	23	4	8	6	14	1	5	9	14	2	6	0	3	5	8
2021-04-04	qingdao	122	115	7	win	39	63	24	0.619	6	21	15	0.286	26	33	7	0.788	6	19	13	0.316	33	59	26	0.559	10	23	0.697	0.263	24	17	17	4	25	29	14	20	2	12	5	10	8	18	1	1	7	9	2	5
2021-04-04	nanjing	83	112	-29	lose	23	47	24	0.489	7	17	10	0.412	16	19	3	0.842	6	20	14	0.3	21	41	20	0.512	6	22	0.611	0.2	19	5	29	0	26	22	6	12	7	16	1	4	3	8	0	1	2	4	3	4
2021-04-04	liaoning	112	83	29	win	30	52	22	0.577	9	28	19	0.321	25	32	7	0.781	6	14	8	0.429	28	61	33	0.459	14	24	0.8	0.389	19	16	16	3	22	26	5	13	2	13	5	6	2	5	3	13	2	4	2	5
2021-04-04	jilin	108	102	6	win	35	62	27	0.565	6	30	24	0.2	20	25	5	0.8	8	20	12	0.4	26	65	39	0.4	15	22	0.629	0.366	19	10	7	3	23	23	11	16	7	12	3	6	8	19	1	6	0	3	4	12
2021-04-04	jiangsu	98	112	-14	lose	22	54	32	0.407	13	26	13	0.5	15	20	5	0.75	2	6	4	0.333	28	69	41	0.406	7	25	0.641	0.171	21	4	18	1	28	21	3	4	6	15	2	5	10	19	5	12	0	0	3	5
2021-04-04	guangzhou	91	107	-16	lose	20	41	21	0.488	11	33	22	0.333	18	21	3	0.857	1	9	8	0.111	30	65	35	0.462	6	26	0.65	0.167	14	9	15	3	23	20	6	9	6	17	3	11	10	19	0	0	2	4	1	2
2021-04-04	beikong	107	91	16	win	26	51	25	0.51	15	29	14	0.517	10	16	6	0.625	3	8	5	0.375	32	66	34	0.485	14	30	0.833	0.35	14	8	18	2	20	23	11	15	6	15	0	3	3	9	0	1	1	3	5	12
2021-04-05	zhejiang	106	101	5	win	38	61	23	0.623	3	19	16	0.158	21	26	5	0.808	4	16	12	0.25	35	62	27	0.565	11	34	0.81	0.324	16	5	22	8	27	24	8	12	4	15	4	8	6	10	1	1	1	2	1	2
2021-04-05	sichuan	101	106	-5	lose	27	55	28	0.491	8	23	15	0.348	23	28	5	0.821	4	12	8	0.333	26	61	35	0.426	8	23	0.676	0.19	13	14	18	1	24	27	6	12	4	9	1	12	7	16	0	1	2	4	7	12
2021-04-05	shenzhen	113	99	14	win	29	53	24	0.547	12	30	18	0.4	19	29	10	0.655	5	13	8	0.385	33	67	34	0.493	13	30	0.732	0.31	24	7	12	1	28	21	7	10	8	19	3	9	8	18	2	5	4	5	1	2
2021-04-05	shanxi	111	129	-18	lose	38	64	26	0.594	7	28	21	0.25	14	25	11	0.56	5	21	16	0.238	38	69	31	0.551	16	25	0.806	0.34	19	5	10	4	20	22	4	10	6	17	3	9	9	15	3	3	7	8	1	1
2021-04-05	shanghai	99	113	-14	lose	25	46	21	0.543	8	30	22	0.267	25	29	4	0.862	4	9	5	0.444	26	64	38	0.406	11	29	0.69	0.268	17	8	14	1	21	28	3	7	5	14	2	7	8	17	5	5	3	7	2	5
2021-04-05	guangdong	90	83	7	win	19	40	21	0.475	7	19	12	0.368	31	44	13	0.705	6	16	10	0.375	14	37	23	0.378	9	34	0.85	0.273	15	10	24	2	29	35	2	7	3	7	5	8	8	19	5	10	1	5	1	2
2021-04-05	fujian	129	111	18	win	28	44	16	0.636	17	32	15	0.531	22	25	3	0.88	7	8	1	0.875	30	60	30	0.5	6	31	0.66	0.194	22	8	18	2	22	20	12	16	9	17	3	5	7	11	1	3	1	4	3	6
2021-04-05	beijing	83	90	-7	lose	19	38	19	0.5	10	33	23	0.303	15	18	3	0.833	11	29	18	0.379	16	40	24	0.4	6	24	0.727	0.15	18	12	18	3	35	29	2	8	11	22	0	3	4	12	1	6	1	2	2	5
2021-04-06	xinjiang	117	136	-19	lose	32	58	26	0.552	10	24	14	0.417	23	36	13	0.639	9	26	17	0.346	31	54	23	0.574	15	25	0.758	0.349	26	7	15	5	31	28	7	17	4	11	3	7	10	12	2	4	4	6	2	3
2021-04-06	shandong	118	88	30	win	22	42	20	0.524	17	37	20	0.459	23	26	3	0.885	10	17	7	0.588	27	60	33	0.45	9	46	0.793	0.257	26	7	19	4	23	22	8	14	11	24	6	8	4	13	0	4	1	2	3	6
2021-04-06	qingdao	136	117	19	win	35	53	18	0.66	13	33	20	0.394	27	33	6	0.818	11	25	14	0.44	31	55	24	0.564	8	28	0.651	0.242	33	8	11	1	28	31	6	13	6	18	9	17	10	17	2	3	2	2	2	2
2021-04-06	nanjing	109	99	10	win	29	44	15	0.659	7	25	18	0.28	30	39	9	0.769	3	7	4	0.429	30	59	29	0.508	6	26	0.703	0.2	15	10	18	2	27	34	5	7	4	12	8	10	13	13	2	2	4	12	3	3
2021-04-06	liaoning	109	97	12	win	37	61	24	0.607	5	18	13	0.278	20	24	4	0.833	7	14	7	0.5	33	63	30	0.524	19	33	0.917	0.528	22	10	20	2	16	22	8	12	5	9	1	6	3	6	2	9	1	3	1	2
2021-04-06	jilin	97	109	-12	lose	22	38	16	0.579	14	38	24	0.368	11	13	2	0.846	12	22	10	0.545	22	52	30	0.423	3	17	0.472	0.083	24	12	12	5	22	16	9	14	10	17	0	2	4	11	2	7	0	0	6	17
2021-04-06	jiangsu	99	109	-10	lose	21	36	15	0.583	10	35	25	0.286	27	34	7	0.794	2	13	11	0.154	26	55	29	0.473	11	24	0.8	0.297	15	10	24	2	34	27	7	12	5	22	2	3	7	10	1	3	1	3	1	2
2021-04-06	beikong	88	118	-30	lose	29	65	36	0.446	6	27	21	0.222	12	15	3	0.8	5	16	11	0.313	26	72	46	0.361	12	26	0.743	0.207	20	9	14	5	22	23	9	15	2	22	0	4	4	12	3	6	3	9	2	6
2021-04-07	sichuan	86	95	-9	lose	21	37	16	0.568	9	31	22	0.29	17	27	10	0.63	2	6	4	0.333	24	58	34	0.414	7	26	0.684	0.212	18	5	17	0	31	33	3	7	5	13	2	7	3	8	1	4	4	9	1	3
2021-04-07	shenzhen	103	96	7	win	25	49	24	0.51	13	31	18	0.419	14	21	7	0.667	14	31	17	0.452	20	45	25	0.444	8	29	0.69	0.182	27	7	7	6	24	21	5	9	9	23	2	12	3	12	2	4	0	0	0	0
2021-04-07	guangsha	96	103	-7	lose	33	59	26	0.559	5	25	20	0.2	15	20	5	0.75	5	24	19	0.208	29	56	27	0.518	13	36	0.818	0.31	24	5	12	5	21	24	6	11	3	15	2	7	9	15	4	9	2	5	2	2
2021-04-07	beijing	95	86	9	win	25	54	29	0.463	6	19	13	0.316	27	33	6	0.818	6	12	6	0.5	20	56	36	0.357	12	26	0.788	0.316	15	5	12	2	33	31	1	2	11	20	1	8	7	13	0	3	2	5	2	3
2021-04-08	zhejiang	97	107	-10	lose	26	51	25	0.51	11	39	28	0.282	12	15	3	0.8	4	15	11	0.267	29	71	42	0.408	16	30	0.769	0.356	20	5	14	6	23	19	7	14	9	25	1	5	6	9	2	4	0	0	4	5
2021-04-08	xinjiang	84	96	-12	lose	19	44	25	0.432	10	38	28	0.263	16	26	10	0.615	4	15	11	0.267	24	66	42	0.364	19	27	0.628	0.345	16	11	16	7	26	21	6	12	7	29	3	7	6	10	2	5	1	4	1	1
2021-04-08	tianjin	86	106	-20	lose	21	42	21	0.5	11	32	21	0.344	11	14	3	0.786	12	28	16	0.429	16	42	26	0.381	7	28	0.718	0.167	26	5	19	1	22	18	7	12	0	11	6	12	3	10	4	7	3	7	0	1
2021-04-08	shandong	106	86	20	win	31	53	22	0.585	7	30	23	0.233	23	29	6	0.793	6	23	17	0.261	29	57	28	0.509	11	35	0.833	0.282	21	14	10	4	18	22	7	16	3	14	7	12	11	19	1	4	0	3	0	2
2021-04-08	qingdao	112	111	1	win	24	49	25	0.49	12	32	20	0.375	28	35	7	0.8	3	7	4	0.429	30	71	41	0.423	14	25	0.735	0.311	15	7	13	0	28	30	4	10	8	19	1	5	8	18	1	3	3	5	1	5
2021-04-08	nanjing	107	121	-14	lose	28	48	20	0.583	14	30	16	0.467	9	10	1	0.9	14	27	13	0.519	24	47	23	0.511	8	22	0.759	0.258	28	6	22	4	21	19	4	14	12	18	5	9	3	7	0	1	7	9	0	0
2021-04-08	liaoning	96	84	12	win	24	51	27	0.471	8	28	20	0.286	24	29	5	0.828	3	6	3	0.5	28	72	44	0.389	16	36	0.655	0.372	23	11	18	3	21	26	5	7	9	22	1	6	1	7	2	4	2	6	2	2
2021-04-08	jilin	111	112	-1	lose	31	54	23	0.574	9	26	17	0.346	22	30	8	0.733	9	22	13	0.409	27	54	27	0.5	9	31	0.689	0.265	21	4	17	3	30	28	8	11	5	19	1	6	7	10	0	1	0	1	3	9
2021-04-08	jiangsu	70	105	-35	lose	23	50	27	0.46	3	24	21	0.125	15	19	4	0.789	3	16	13	0.188	22	57	35	0.386	13	22	0.629	0.289	13	11	20	6	21	20	3	7	2	12	3	7	4	11	0	5	1	3	3	9
2021-04-08	guangzhou	121	107	14	win	26	43	17	0.605	19	34	15	0.559	12	20	8	0.6	18	28	10	0.643	25	47	22	0.532	7	23	0.742	0.241	21	9	15	2	19	21	4	11	8	16	2	4	9	13	1	1	4	6	1	1
2021-04-08	fujian	107	97	10	win	24	51	27	0.471	15	30	15	0.5	14	20	6	0.7	7	14	7	0.5	29	64	35	0.453	9	29	0.644	0.231	21	6	10	4	19	23	8	16	4	10	5	12	6	10	2	3	0	0	3	5
2021-04-08	beikong	105	70	35	win	27	50	23	0.54	11	24	13	0.458	18	21	3	0.857	6	20	14	0.3	29	51	22	0.569	13	32	0.711	0.371	21	11	20	2	20	21	3	10	9	16	2	4	7	10	4	8	5	8	2	4
2021-04-09	shanxi	102	93	9	win	30	50	20	0.6	9	24	15	0.375	15	27	12	0.556	4	13	9	0.308	30	56	26	0.536	10	33	0.702	0.27	20	7	11	3	22	27	7	10	2	7	3	8	10	12	4	9	2	5	4	6
2021-04-09	shanghai	93	102	-9	lose	18	44	26	0.409	10	32	22	0.313	27	31	4	0.871	4	10	6	0.4	19	61	42	0.311	14	27	0.73	0.298	13	8	11	2	27	22	4	11	6	14	4	10	6	13	1	1	0	1	4	7
2021-04-09	guangsha	107	83	24	win	24	49	25	0.49	14	23	9	0.609	17	26	9	0.654	14	19	5	0.737	21	50	29	0.42	12	28	0.8	0.387	24	4	17	2	24	29	2	2	10	16	1	3	4	10	2	3	7	12	3	6
2021-04-09	beijing	83	107	-24	lose	23	40	17	0.575	7	24	17	0.292	16	21	5	0.762	9	20	11	0.45	19	42	23	0.452	7	19	0.613	0.2	17	5	17	4	29	24	0	2	6	16	3	5	9	13	2	6	0	3	1	3
2021-04-10	tianjin	98	94	4	win	29	49	20	0.592	7	26	19	0.269	19	28	9	0.679	3	11	8	0.273	29	60	31	0.483	9	30	0.75	0.231	21	15	16	3	25	27	10	14	5	15	2	8	10	16	2	3	1	4	2	6
2021-04-10	shenzhen	104	118	-14	lose	21	48	27	0.438	18	40	22	0.45	8	12	4	0.667	17	32	15	0.531	20	54	34	0.37	13	31	0.689	0.31	28	3	16	5	27	16	3	8	9	22	5	8	5	8	3	4	1	6	0	2
2021-04-10	qingdao	117	101	16	win	33	55	22	0.6	7	20	13	0.35	30	40	10	0.75	4	8	4	0.5	30	61	31	0.492	12	37	0.712	0.333	20	6	14	5	31	35	14	19	4	9	2	4	4	9	2	5	2	6	2	3
2021-04-10	nanjing	101	117	-16	lose	24	63	39	0.381	10	25	15	0.4	23	29	6	0.793	10	25	15	0.4	21	60	39	0.35	15	24	0.667	0.288	15	5	9	0	35	31	8	14	7	16	0	8	3	11	0	2	3	9	2	6
2021-04-10	jilin	85	103	-18	lose	24	62	38	0.387	7	22	15	0.318	16	20	4	0.8	8	18	10	0.444	19	62	43	0.306	8	23	0.622	0.163	17	9	8	4	22	21	4	8	4	15	4	12	9	23	2	5	1	5	1	4
2021-04-10	jiangsu	94	98	-4	lose	18	39	21	0.462	13	34	21	0.382	19	27	8	0.704	3	9	6	0.333	25	61	36	0.41	10	30	0.769	0.25	13	11	22	3	27	25	6	13	3	14	2	5	5	11	0	1	2	3	2	8
2021-04-10	guangzhou	103	85	18	win	22	39	17	0.564	14	34	20	0.412	17	22	5	0.773	14	26	12	0.538	15	40	25	0.375	14	41	0.837	0.378	18	5	22	6	21	22	9	12	7	20	3	9	7	14	1	2	3	3	0	0
2021-04-10	fujian	118	104	14	win	30	55	25	0.545	12	36	24	0.333	22	26	4	0.846	7	25	18	0.28	29	60	31	0.483	14	29	0.69	0.311	20	11	10	5	16	27	12	16	4	20	5	11	8	11	0	4	1	1	2	6
2021-04-11	zhejiang	105	81	24	win	30	56	26	0.536	10	30	20	0.333	15	23	8	0.652	0	3	3	0	37	80	43	0.463	14	27	0.675	0.341	25	10	14	7	29	26	7	11	9	28	4	10	6	15	1	2	0	0	1	2
2021-04-11	xinjiang	98	114	-16	lose	29	47	18	0.617	8	32	24	0.25	16	24	8	0.667	5	12	7	0.417	28	63	35	0.444	11	20	0.541	0.244	20	8	14	2	22	24	13	14	6	18	0	7	6	15	1	2	2	4	0	4
2021-04-11	shandong	114	98	16	win	24	52	28	0.462	16	28	12	0.571	18	21	3	0.857	1	5	4	0.2	34	70	36	0.486	17	34	0.756	0.459	23	1	21	1	24	22	8	10	11	22	1	4	5	14	1	2	3	5	5	8
2021-04-11	liaoning	107	99	8	win	26	53	27	0.491	12	34	22	0.353	19	25	6	0.76	7	22	15	0.318	29	63	34	0.46	15	35	0.778	0.341	19	7	16	0	25	26	5	8	4	14	2	5	9	16	0	7	2	5	1	4
2021-04-11	guangdong	81	105	-24	lose	20	48	28	0.417	7	22	15	0.318	20	30	10	0.667	1	4	3	0.25	24	64	40	0.375	13	27	0.659	0.325	15	7	26	6	26	29	4	13	5	13	3	11	8	19	0	0	2	2	0	1
2021-04-11	beikong	99	107	-8	lose	31	56	25	0.554	8	29	21	0.276	13	26	13	0.5	7	30	23	0.233	27	50	23	0.54	10	29	0.659	0.222	19	2	12	6	26	25	4	8	7	19	4	11	12	20	1	2	0	2	1	3
2021-04-12	sichuan	108	115	-7	lose	29	50	21	0.58	12	34	22	0.353	14	26	12	0.538	10	25	15	0.4	29	57	28	0.509	10	35	0.854	0.244	28	5	16	0	23	25	4	9	7	20	5	8	7	10	2	3	5	10	1	2
2021-04-12	shenzhen	115	108	7	win	25	52	27	0.481	15	27	12	0.556	20	28	8	0.714	10	24	14	0.417	29	54	25	0.537	6	31	0.756	0.146	18	10	11	2	25	23	11	15	4	10	3	5	6	12	1	5	0	2	1	2
2021-04-12	shanxi	102	100	2	win	27	51	24	0.529	10	21	11	0.476	18	23	5	0.783	9	19	10	0.474	25	50	25	0.5	8	28	0.683	0.229	27	4	14	5	20	20	3	7	5	11	2	6	3	10	3	4	6	9	0	3
2021-04-12	jilin	111	94	17	win	30	43	13	0.698	14	36	22	0.389	9	14	5	0.643	6	18	12	0.333	35	58	23	0.603	10	20	0.667	0.345	23	9	12	1	15	20	3	5	9	26	6	10	8	9	3	3	4	6	3	7
2021-04-12	jiangsu	94	111	-17	lose	30	41	11	0.732	8	30	22	0.267	10	15	5	0.667	5	18	13	0.278	32	52	20	0.615	10	19	0.655	0.333	23	6	17	4	20	15	3	6	5	15	3	6	10	14	1	3	1	2	0	1
2021-04-12	guangsha	100	102	-2	lose	33	65	32	0.508	6	22	16	0.273	16	17	1	0.941	6	20	14	0.3	28	62	34	0.452	13	27	0.771	0.317	21	8	10	4	20	20	4	9	5	16	0	3	8	15	2	6	1	4	0	2
2021-04-12	fujian	92	125	-33	lose	19	43	24	0.442	9	26	17	0.346	27	31	4	0.871	6	13	7	0.462	21	55	34	0.382	11	19	0.655	0.275	9	3	18	4	14	28	4	9	2	10	0	3	7	12	0	1	0	2	4	12
2021-04-12	beijing	125	92	33	win	41	64	23	0.641	12	24	12	0.5	7	9	2	0.778	12	23	11	0.522	39	63	24	0.619	10	29	0.725	0.345	32	7	10	1	28	14	11	12	12	18	2	7	7	10	2	5	1	9	3	4
2021-04-13	zhejiang	113	103	10	win	27	50	23	0.54	12	33	21	0.364	23	31	8	0.742	11	25	14	0.44	27	57	30	0.474	13	33	0.868	0.325	26	6	15	6	26	28	10	15	4	14	5	10	4	9	2	4	0	0	0	3
2021-04-13	xinjiang	94	105	-11	lose	24	46	22	0.522	12	39	27	0.308	10	13	3	0.769	7	18	11	0.389	28	66	38	0.424	7	23	0.657	0.152	20	5	8	5	17	18	9	16	5	19	1	6	3	8	0	2	5	10	0	2
2021-04-13	tianjin	106	114	-8	lose	21	47	26	0.447	18	40	22	0.45	10	15	5	0.667	10	26	16	0.385	28	60	32	0.467	13	26	0.52	0.283	23	9	17	5	23	18	9	17	11	25	4	11	3	12	2	3	1	1	0	1
2021-04-13	shanghai	103	113	-10	lose	27	48	21	0.563	9	26	17	0.346	22	33	11	0.667	9	21	12	0.429	25	51	26	0.49	5	27	0.675	0.132	18	10	15	7	28	26	5	8	5	16	1	3	6	13	3	5	1	3	5	7
2021-04-13	shandong	114	106	8	win	33	65	32	0.508	10	31	21	0.323	18	28	10	0.643	3	12	9	0.25	34	78	44	0.436	11	42	0.857	0.216	22	4	11	5	21	26	10	14	5	20	4	12	10	19	2	4	2	4	2	5
2021-04-13	qingdao	106	99	7	win	23	60	37	0.383	12	28	16	0.429	24	32	8	0.75	8	17	9	0.471	23	67	44	0.343	12	37	0.74	0.25	16	6	11	3	23	29	3	13	6	16	1	5	7	16	2	4	0	7	2	5
2021-04-13	nanjing	106	114	-8	lose	36	64	28	0.563	7	30	23	0.233	13	20	7	0.65	2	6	4	0.333	35	82	47	0.427	7	40	0.784	0.143	19	5	11	4	26	21	12	21	3	16	3	5	9	17	1	2	3	5	2	4
2021-04-13	liaoning	114	106	8	win	29	57	28	0.509	11	39	28	0.282	23	26	3	0.885	8	28	20	0.286	27	63	36	0.429	24	33	0.717	0.48	20	11	13	2	18	23	8	17	8	31	4	7	5	9	2	6	1	1	1	1
2021-04-13	guangzhou	105	94	11	win	31	56	25	0.554	10	23	13	0.435	13	14	1	0.929	6	11	5	0.545	30	63	33	0.476	12	39	0.848	0.343	22	4	16	1	18	17	5	5	6	15	1	4	8	11	2	2	4	10	0	1
2021-04-13	beikong	99	106	-7	lose	34	74	40	0.459	6	18	12	0.333	13	17	4	0.765	15	34	19	0.441	21	54	33	0.389	13	36	0.75	0.26	16	5	15	11	29	23	10	14	4	13	0	5	5	13	3	6	1	4	3	7
2020-06-20	xinjiang	113	99	14	win	25	48	23	0.521	14	39	25	0.359	21	29	8	0.724	7	23	16	0.304	29	61	32	0.475	14	35	0.814	0.326	27	9	15	8	31	24	13	18	8	29	2	4	5	10	2	6	0	2	0	2
2020-06-20	shenzhen	98	105	-7	lose	27	56	29	0.482	6	22	16	0.273	26	38	12	0.684	5	11	6	0.455	22	61	39	0.361	13	26	0.722	0.295	25	11	15	4	27	33	8	12	5	13	5	11	8	17	4	10	2	7	1	5
2020-06-20	shanxi	82	105	-23	lose	23	57	34	0.404	4	20	16	0.2	24	40	16	0.6	1	9	8	0.111	20	62	42	0.323	16	27	0.73	0.296	15	11	16	5	24	32	4	8	3	11	2	9	7	18	3	6	1	4	1	7
2020-06-20	qingdao	99	113	-14	lose	26	58	32	0.448	7	20	13	0.35	26	34	8	0.765	1	4	3	0.25	25	67	42	0.373	8	29	0.674	0.186	11	6	19	2	24	31	4	7	2	9	2	11	13	32	3	7	1	4	3	9
2020-06-20	nanjing	95	112	-17	lose	25	50	25	0.5	10	31	21	0.323	15	29	14	0.517	6	22	16	0.273	25	55	30	0.455	10	24	0.545	0.263	16	9	19	4	23	31	8	16	6	20	1	6	8	18	0	1	2	2	4	9
2020-06-20	liaoning	82	91	-9	lose	21	45	24	0.467	4	20	16	0.2	28	37	9	0.757	0	5	5	0	21	56	35	0.375	9	26	0.684	0.237	13	6	17	1	22	29	4	8	3	12	0	3	5	15	1	2	3	5	3	13
2020-06-20	jiangsu	105	98	7	win	26	53	27	0.491	13	26	13	0.5	14	19	5	0.737	1	3	2	0.333	34	72	38	0.472	10	31	0.705	0.278	22	7	18	5	33	27	4	6	11	19	3	8	13	28	1	2	0	1	7	16
2020-06-20	guangsha	112	95	17	win	34	71	37	0.479	9	20	11	0.45	17	24	7	0.708	9	24	15	0.375	30	63	33	0.476	20	28	0.737	0.455	22	10	22	7	31	23	8	14	7	15	0	4	10	26	4	12	0	2	1	4
2020-06-20	guangdong	105	82	23	win	34	57	23	0.596	8	23	15	0.348	13	22	9	0.591	6	11	5	0.545	35	68	33	0.515	10	38	0.704	0.27	27	8	16	5	32	24	7	13	7	16	2	7	8	17	5	7	2	5	2	3
2020-06-20	beijing	91	82	9	win	18	39	21	0.462	12	33	21	0.364	19	25	6	0.76	1	3	2	0.333	26	66	40	0.394	12	29	0.763	0.316	19	10	17	3	29	22	4	7	6	15	1	3	1	6	4	8	1	3	2	7
2020-06-21	zhejiang	115	97	18	win	32	45	13	0.711	10	32	22	0.313	21	23	2	0.913	9	22	13	0.409	28	50	22	0.56	12	29	0.879	0.364	27	8	21	2	35	28	7	10	8	19	6	9	11	18	1	2	2	2	1	2
2020-06-21	tianjin	83	84	-1	lose	19	44	25	0.432	10	35	25	0.286	15	23	8	0.652	10	32	22	0.313	18	46	28	0.391	9	27	0.628	0.205	19	9	11	2	34	24	3	6	7	18	5	12	6	21	6	10	1	2	0	2
2020-06-21	sichuan	85	97	-12	lose	20	39	19	0.513	10	30	20	0.333	15	23	8	0.652	1	5	4	0.2	26	61	35	0.426	16	29	0.784	0.421	20	4	25	1	24	25	4	7	6	18	4	9	3	7	1	3	1	3	1	2
2020-06-21	shanghai	97	115	-18	lose	23	53	30	0.434	7	12	5	0.583	30	40	10	0.75	0	4	4	0	27	58	31	0.466	4	21	0.636	0.121	19	11	17	3	28	35	3	7	4	6	1	3	9	19	1	4	3	9	2	4
2020-06-21	shandong	84	83	1	win	19	43	24	0.442	7	21	14	0.333	25	41	16	0.61	7	15	8	0.467	17	47	30	0.362	16	35	0.795	0.372	16	5	21	6	24	34	4	8	4	16	1	7	3	13	1	2	3	7	0	0
2020-06-21	ningbo	88	104	-16	lose	26	58	32	0.448	3	17	14	0.176	27	35	8	0.771	2	9	7	0.222	26	65	39	0.4	16	35	0.778	0.356	16	4	16	3	24	26	3	6	1	11	5	9	9	18	0	5	4	13	6	7
2020-06-21	jilin	97	85	12	win	33	56	23	0.589	5	20	15	0.25	16	23	7	0.696	1	2	1	0.5	33	70	37	0.471	8	22	0.579	0.216	23	13	9	1	25	24	8	14	5	14	3	12	2	6	0	0	4	4	2	3
2020-06-21	guangzhou	104	88	16	win	32	65	33	0.492	9	22	13	0.409	13	19	6	0.684	7	13	6	0.538	31	71	40	0.437	10	29	0.644	0.222	21	5	7	4	26	24	5	11	6	18	2	6	8	18	0	0	3	7	5	9
2020-06-21	fujian	121	108	13	win	35	60	25	0.583	8	23	15	0.348	27	38	11	0.711	2	5	3	0.4	35	72	37	0.486	12	29	0.659	0.267	27	11	17	2	31	32	9	14	0	3	5	7	9	22	2	7	3	4	1	7
2020-06-21	beikong	108	121	-13	lose	37	66	29	0.561	3	20	17	0.15	25	38	13	0.658	4	12	8	0.333	30	68	38	0.441	15	33	0.733	0.341	25	9	19	3	32	31	8	14	5	18	4	13	9	25	5	7	1	2	0	4
2020-06-22	xinjiang	102	82	20	win	22	44	22	0.5	14	32	18	0.438	16	24	8	0.667	12	30	18	0.4	22	44	22	0.5	15	40	0.727	0.366	25	7	19	3	21	16	7	13	11	23	0	2	5	9	3	7	0	5	2	4
2020-06-22	tianjin	72	101	-29	lose	13	35	22	0.371	8	36	28	0.222	22	30	8	0.733	4	15	11	0.267	15	54	39	0.278	11	21	0.568	0.239	14	10	13	1	24	25	1	7	5	28	3	9	5	12	3	6	0	3	1	3
2020-06-22	sichuan	101	72	29	win	24	45	21	0.533	10	29	19	0.345	23	31	8	0.742	5	12	7	0.417	23	56	33	0.411	16	35	0.761	0.432	23	10	15	2	25	24	6	8	6	16	1	5	3	17	3	5	2	6	0	3
2020-06-22	shenzhen	104	139	-35	lose	24	44	20	0.545	9	33	24	0.273	29	40	11	0.725	3	6	3	0.5	26	67	41	0.388	9	19	0.559	0.2	16	10	18	1	24	35	7	13	7	21	1	1	6	16	1	2	0	1	2	8
2020-06-22	shanxi	106	102	4	win	31	46	15	0.674	7	17	10	0.412	23	32	9	0.719	5	8	3	0.625	28	50	22	0.56	5	29	0.725	0.172	17	6	17	0	29	28	1	1	2	9	8	12	13	16	7	9	4	6	3	4
2020-06-22	shanghai	90	95	-5	lose	31	49	18	0.633	5	18	13	0.278	13	26	13	0.5	4	5	1	0.8	28	58	30	0.483	8	29	0.604	0.242	19	12	27	1	30	24	5	10	5	11	4	8	8	12	3	6	3	3	1	3
2020-06-22	qingdao	103	95	8	win	29	64	35	0.453	8	18	10	0.444	21	28	7	0.75	1	9	8	0.111	34	71	37	0.479	13	24	0.571	0.342	15	8	15	2	28	30	7	7	3	8	6	9	14	27	4	6	3	7	1	2
2020-06-22	ningbo	82	102	-20	lose	22	59	37	0.373	8	27	19	0.296	14	22	8	0.636	6	28	22	0.214	22	56	34	0.393	15	26	0.634	0.273	12	12	12	0	16	21	5	8	10	30	3	7	8	24	0	2	1	7	2	10
2020-06-22	nanjing	95	103	-8	lose	17	36	19	0.472	12	39	27	0.308	25	35	10	0.714	2	6	4	0.333	23	65	42	0.354	18	25	0.658	0.429	7	5	22	4	30	28	9	14	2	18	2	4	5	11	0	1	0	4	6	14
2020-06-22	jiangsu	102	106	-4	lose	28	44	16	0.636	8	31	23	0.258	22	32	10	0.688	1	8	7	0.125	33	65	32	0.508	11	24	0.828	0.275	19	7	11	1	28	29	4	7	5	15	2	10	8	15	0	1	1	1	3	5
2020-06-22	guangsha	95	90	5	win	33	60	27	0.55	3	25	22	0.12	20	28	8	0.714	3	11	8	0.273	30	71	41	0.423	19	25	0.758	0.396	15	12	17	0	24	30	8	13	3	21	5	6	6	11	2	4	1	5	1	2
2020-06-22	guangdong	139	104	35	win	49	73	24	0.671	7	22	15	0.318	20	25	5	0.8	2	6	4	0.333	49	84	35	0.583	15	36	0.8	0.441	25	10	17	3	35	24	11	17	7	18	2	7	12	21	2	3	2	5	3	5
2020-06-23	zhejiang	93	118	-25	lose	26	52	26	0.5	7	26	19	0.269	20	27	7	0.741	3	10	7	0.3	27	65	38	0.415	11	17	0.515	0.244	14	9	16	4	31	25	6	15	8	24	4	10	8	15	1	3	2	4	1	2
2020-06-23	shandong	94	103	-9	lose	23	44	21	0.523	9	31	22	0.29	21	24	3	0.875	3	9	6	0.333	26	63	37	0.413	10	31	0.705	0.244	20	5	24	3	28	22	7	9	6	17	2	3	5	14	0	8	2	5	2	4
2020-06-23	nanjing	93	90	3	win	27	47	20	0.574	7	22	15	0.318	18	29	11	0.621	2	12	10	0.167	31	56	25	0.554	10	24	0.585	0.286	24	9	15	1	21	27	4	6	7	16	2	4	6	14	0	0	2	3	3	7
2020-06-23	liaoning	102	106	-4	lose	33	57	24	0.579	7	27	20	0.259	15	20	5	0.75	10	18	8	0.556	28	64	36	0.438	11	27	0.711	0.282	15	14	12	0	23	23	11	19	2	14	3	5	8	14	4	6	3	4	2	4
2020-06-23	jilin	112	107	5	win	20	49	29	0.408	19	41	22	0.463	15	18	3	0.833	5	11	6	0.455	32	77	45	0.416	13	27	0.692	0.295	24	5	11	0	25	19	7	12	15	29	2	8	5	18	1	6	0	2	4	11
2020-06-23	jiangsu	71	119	-48	lose	19	48	29	0.396	8	30	22	0.267	9	13	4	0.692	4	15	11	0.267	23	63	40	0.365	3	22	0.667	0.061	14	4	10	1	28	16	7	10	5	20	2	4	4	19	1	3	1	6	2	10
2020-06-23	guangzhou	106	102	4	win	23	46	23	0.5	15	31	16	0.484	15	20	5	0.75	15	23	8	0.652	21	52	31	0.404	11	28	0.718	0.289	19	5	17	4	23	23	5	9	7	20	2	6	8	15	2	3	1	2	1	2
2020-06-23	guangsha	118	93	25	win	28	49	21	0.571	11	23	12	0.478	29	39	10	0.744	5	8	3	0.625	31	61	30	0.508	16	34	0.756	0.485	16	6	20	2	25	31	6	11	9	17	3	7	8	15	0	1	1	2	0	1
2020-06-23	guangdong	119	71	48	win	31	59	28	0.525	13	23	10	0.565	18	23	5	0.783	12	20	8	0.6	29	59	30	0.492	11	46	0.939	0.333	24	5	13	7	16	28	4	8	10	20	4	10	7	18	7	10	4	6	1	5
2020-06-23	fujian	107	112	-5	lose	30	50	20	0.6	9	31	22	0.29	20	27	7	0.741	3	8	5	0.375	35	72	37	0.486	12	31	0.705	0.308	25	3	13	2	19	25	8	12	9	22	5	9	7	15	2	4	3	4	0	7
2020-06-23	beikong	103	94	9	win	30	58	28	0.517	8	22	14	0.364	19	29	10	0.655	4	10	6	0.4	31	67	36	0.463	13	31	0.756	0.295	27	12	14	1	22	28	6	11	7	17	3	7	6	20	3	7	4	5	0	3
2020-06-23	beijing	90	93	-3	lose	25	49	24	0.51	9	31	22	0.29	13	18	5	0.722	5	13	8	0.385	28	66	38	0.424	17	25	0.714	0.415	22	10	21	4	27	21	4	7	7	18	4	8	8	21	3	8	1	1	3	7
2020-06-24	xinjiang	67	78	-11	lose	17	37	20	0.459	6	35	29	0.171	15	22	7	0.682	2	5	3	0.4	17	63	46	0.27	8	28	0.667	0.2	15	3	18	2	22	26	6	15	0	10	0	4	3	12	3	11	1	2	0	2
2020-06-24	tianjin	83	97	-14	lose	21	51	30	0.412	9	33	24	0.273	14	20	6	0.7	6	15	9	0.4	22	67	45	0.328	13	25	0.781	0.241	17	10	13	0	26	25	4	8	12	32	1	14	1	11	1	3	2	2	1	9
2020-06-24	sichuan	76	88	-12	lose	27	54	27	0.5	3	22	19	0.136	13	18	5	0.722	2	6	4	0.333	26	68	42	0.382	11	28	0.778	0.289	24	8	20	3	20	25	3	6	2	15	3	8	3	11	3	8	4	8	0	0
2020-06-24	shenzhen	97	83	14	win	27	47	20	0.574	7	21	14	0.333	22	33	11	0.667	7	12	5	0.583	25	54	29	0.463	7	41	0.759	0.219	25	3	20	7	25	26	4	7	5	13	4	6	5	10	8	13	2	4	0	4
2020-06-24	shanxi	88	76	12	win	18	44	26	0.409	13	28	15	0.464	13	17	4	0.765	2	4	2	0.5	27	66	39	0.409	8	27	0.711	0.222	23	9	19	5	25	20	6	8	8	17	0	6	1	6	5	8	4	10	0	0
2020-06-24	shanghai	87	104	-17	lose	25	48	23	0.521	8	26	18	0.308	13	19	6	0.684	7	16	9	0.438	25	57	32	0.439	8	28	0.824	0.205	19	6	18	3	18	23	2	8	9	19	2	5	10	18	1	3	1	1	4	9
2020-06-24	qingdao	94	82	12	win	25	46	21	0.543	10	26	16	0.385	14	24	10	0.583	3	9	6	0.333	32	63	31	0.508	10	28	0.583	0.294	16	5	12	1	28	20	3	4	7	14	1	3	13	23	0	3	2	5	3	5
2020-06-24	ningbo	82	94	-12	lose	28	65	37	0.431	2	22	20	0.091	20	28	8	0.714	1	10	9	0.1	23	71	48	0.324	20	24	0.706	0.417	14	4	10	3	20	28	5	8	3	25	1	3	8	19	0	2	5	12	4	7
2020-06-24	liaoning	104	87	17	win	31	49	18	0.633	10	28	18	0.357	12	16	4	0.75	5	18	13	0.278	34	57	23	0.596	6	31	0.795	0.176	25	12	16	1	23	18	12	15	6	18	3	6	8	16	2	4	0	1	4	8
2020-06-24	beijing	78	67	11	win	25	51	26	0.49	4	25	21	0.16	16	21	5	0.762	2	8	6	0.25	22	63	41	0.349	14	32	0.8	0.333	11	9	18	4	26	22	4	9	2	16	0	5	9	23	1	6	2	4	2	6
2020-06-25	xinjiang	95	90	5	win	18	36	18	0.5	14	40	26	0.35	17	24	7	0.708	6	13	7	0.462	22	59	37	0.373	10	34	0.791	0.256	27	9	16	0	25	21	8	17	8	29	3	9	3	7	5	6	1	3	0	0
2020-06-25	shenzhen	102	94	8	win	29	50	21	0.58	7	21	14	0.333	23	39	16	0.59	6	15	9	0.4	23	49	26	0.469	13	24	0.615	0.351	18	7	10	0	22	28	6	11	2	17	1	4	4	10	3	3	6	10	1	3
2020-06-25	shandong	84	93	-9	lose	20	44	24	0.455	12	34	22	0.353	8	17	9	0.471	8	21	13	0.381	23	56	33	0.411	18	27	0.771	0.391	19	4	20	4	29	23	4	5	6	25	4	10	8	17	4	6	1	2	0	4
2020-06-25	qingdao	90	95	-5	lose	28	50	22	0.56	6	27	21	0.222	16	23	7	0.696	2	11	9	0.182	31	65	34	0.477	9	29	0.744	0.209	19	8	14	0	21	25	4	8	3	17	7	14	12	20	2	5	2	4	0	1
2020-06-25	nanjing	105	103	2	win	24	39	15	0.615	9	27	18	0.333	30	37	7	0.811	5	12	7	0.417	24	50	26	0.48	4	35	0.761	0.121	16	2	14	2	18	29	5	8	2	12	2	2	9	14	1	3	1	3	6	10
2020-06-25	jilin	94	102	-8	lose	24	48	24	0.5	11	33	22	0.333	13	16	3	0.813	8	20	12	0.4	25	59	34	0.424	15	24	0.649	0.385	17	4	14	0	28	22	2	8	7	24	3	7	10	18	1	2	0	1	6	11
2020-06-25	jiangsu	95	104	-9	lose	22	39	17	0.564	8	27	19	0.296	27	31	4	0.871	2	6	4	0.333	27	59	32	0.458	7	24	0.558	0.206	21	13	20	0	32	25	4	5	6	13	2	6	5	9	2	4	2	7	0	0
2020-06-25	guangzhou	103	105	-2	lose	33	69	36	0.478	7	20	13	0.35	16	22	6	0.727	9	18	9	0.5	27	67	40	0.403	11	29	0.879	0.239	21	6	8	2	29	18	6	9	6	16	2	5	7	17	1	5	2	5	3	8
2020-06-25	fujian	93	84	9	win	29	55	26	0.527	5	22	17	0.227	20	32	12	0.625	4	14	10	0.286	28	61	33	0.459	8	28	0.609	0.229	15	16	8	2	23	29	10	18	2	12	3	8	9	16	2	5	2	4	2	5
2020-06-25	beikong	104	95	9	win	27	56	29	0.482	7	24	17	0.292	29	37	8	0.784	5	17	12	0.294	26	60	34	0.433	19	27	0.794	0.442	22	12	19	2	25	32	6	11	7	21	4	10	4	9	0	3	4	7	0	1
2020-06-26	zhejiang	96	77	19	win	20	49	29	0.408	15	34	19	0.441	11	12	1	0.917	6	11	5	0.545	27	70	43	0.386	19	31	0.939	0.452	26	7	20	2	16	21	4	10	12	29	2	7	2	6	1	2	1	2	1	1
2020-06-26	tianjin	79	132	-53	lose	15	45	30	0.333	9	28	19	0.321	22	28	6	0.786	3	14	11	0.214	20	58	38	0.345	13	24	0.558	0.283	18	9	32	2	30	25	4	5	11	25	2	9	2	7	0	1	0	2	3	13
2020-06-26	shanxi	98	106	-8	lose	27	48	21	0.563	9	31	22	0.29	17	30	13	0.567	6	14	8	0.429	26	61	35	0.426	13	23	0.742	0.289	18	11	17	1	23	25	8	9	4	12	2	7	10	21	6	14	3	7	1	5
2020-06-26	shanghai	85	75	10	win	21	49	28	0.429	7	18	11	0.389	22	32	10	0.688	7	18	11	0.389	15	43	28	0.349	14	32	0.762	0.326	16	8	20	5	23	23	4	6	7	19	1	2	10	21	2	3	1	4	3	9
2020-06-26	ningbo	77	96	-19	lose	25	52	27	0.481	5	16	11	0.313	12	16	4	0.75	0	4	4	0	28	62	34	0.452	2	23	0.548	0.061	14	10	18	2	21	16	2	4	5	14	3	5	8	15	1	3	4	9	1	5
2020-06-26	jilin	111	120	-9	lose	19	37	18	0.514	17	42	25	0.405	22	28	6	0.786	2	7	5	0.286	30	68	38	0.441	6	27	0.771	0.136	21	6	11	1	22	22	8	13	5	20	2	8	10	19	7	8	0	2	2	3
2020-06-26	guangzhou	75	85	-10	lose	22	54	32	0.407	6	20	14	0.3	13	22	9	0.591	8	29	21	0.276	19	44	25	0.432	10	29	0.674	0.238	16	13	15	3	23	23	7	9	3	16	3	5	3	12	0	3	1	4	0	2
2020-06-26	guangsha	100	87	13	win	26	61	35	0.426	9	16	7	0.563	21	27	6	0.778	12	24	12	0.5	21	51	30	0.412	15	24	0.889	0.366	19	12	19	1	18	27	8	11	2	5	0	4	10	29	8	11	0	4	0	1
2020-06-26	guangdong	132	79	53	win	51	79	28	0.646	4	20	16	0.2	18	26	8	0.692	1	13	12	0.077	48	80	32	0.6	19	33	0.717	0.442	24	24	14	4	25	30	16	22	3	17	5	9	13	19	0	1	1	4	3	6
2020-06-26	fujian	120	111	9	win	33	53	20	0.623	13	30	17	0.433	15	15	0	1	1	2	1	0.5	42	78	36	0.538	8	38	0.864	0.229	29	5	11	3	22	22	8	13	12	20	5	9	11	19	2	4	0	1	3	6
2020-06-26	beikong	106	98	8	win	26	44	18	0.591	10	24	14	0.417	24	31	7	0.774	7	15	8	0.467	24	48	24	0.5	8	32	0.711	0.258	20	9	22	10	25	23	6	7	9	22	4	9	7	15	1	2	4	7	3	5
2020-06-26	beijing	87	100	-13	lose	22	34	12	0.647	13	28	15	0.464	4	11	7	0.364	9	20	11	0.45	25	41	16	0.61	3	26	0.634	0.111	22	10	27	3	27	18	9	14	8	18	4	8	8	14	5	10	0	0	0	0
2020-06-27	zhejiang	101	90	11	win	25	50	25	0.5	12	35	23	0.343	15	21	6	0.714	4	10	6	0.4	28	70	42	0.4	14	29	0.69	0.35	21	5	16	3	28	25	1	2	7	21	4	12	7	15	1	5	0	0	2	2
2020-06-27	xinjiang	102	82	20	win	22	43	21	0.512	12	34	22	0.353	22	28	6	0.786	4	18	14	0.222	28	57	29	0.491	18	41	0.707	0.514	26	9	22	6	24	26	7	15	10	26	0	4	1	7	3	7	0	2	0	0
2020-06-27	sichuan	79	68	11	win	23	44	21	0.523	10	31	21	0.323	3	9	6	0.333	2	12	10	0.167	26	58	32	0.448	10	32	0.865	0.25	23	9	17	2	22	16	3	5	8	17	0	2	5	12	1	8	1	4	2	4
2020-06-27	shenzhen	90	88	2	win	24	46	22	0.522	7	25	18	0.28	21	31	10	0.677	2	14	12	0.143	28	56	28	0.5	16	34	0.829	0.4	23	5	18	3	24	25	4	5	7	24	5	9	7	14	0	0	0	2	3	6
2020-06-27	shanxi	88	90	-2	lose	16	45	29	0.356	14	28	14	0.5	14	18	4	0.778	6	14	8	0.429	23	58	35	0.397	7	24	0.6	0.171	15	7	16	1	25	24	4	5	6	19	1	7	4	15	2	2	2	6	5	14
2020-06-27	shandong	68	79	-11	lose	21	43	22	0.488	5	19	14	0.263	11	18	7	0.611	1	2	1	0.5	23	58	35	0.397	5	30	0.75	0.135	11	6	16	3	16	22	6	7	2	11	2	8	4	13	1	4	5	11	1	6
2020-06-27	qingdao	82	102	-20	lose	24	53	29	0.453	6	33	27	0.182	16	24	8	0.667	2	10	8	0.2	25	73	48	0.342	17	17	0.486	0.293	15	8	15	1	26	24	6	11	2	15	4	7	8	20	3	9	3	5	0	1
2020-06-27	liaoning	90	101	-11	lose	24	51	27	0.471	7	21	14	0.333	21	34	13	0.618	2	10	8	0.2	27	60	33	0.45	13	26	0.65	0.31	11	8	16	1	25	28	7	14	2	9	2	5	5	11	2	6	2	6	1	1
2020-06-28	tianjin	104	120	-16	lose	26	54	28	0.481	8	28	20	0.286	28	35	7	0.8	4	6	2	0.667	27	73	46	0.37	13	19	0.594	0.302	22	9	14	0	27	33	4	5	8	26	4	14	8	22	3	5	2	5	2	5
2020-06-28	shanghai	76	86	-10	lose	27	56	29	0.482	3	20	17	0.15	13	17	4	0.765	2	9	7	0.222	27	66	39	0.409	6	22	0.688	0.14	14	8	9	1	18	23	6	8	3	14	3	8	9	20	1	6	4	10	1	7
2020-06-28	ningbo	95	97	-2	lose	38	68	30	0.559	3	27	24	0.111	10	13	3	0.769	8	25	17	0.32	30	67	37	0.448	15	35	0.778	0.319	17	5	9	5	20	19	7	11	5	22	0	5	8	21	2	5	6	12	3	6
2020-06-28	nanjing	97	95	2	win	27	54	27	0.5	9	28	19	0.321	16	25	9	0.64	2	13	11	0.154	31	66	35	0.47	10	32	0.681	0.222	10	5	12	4	19	20	7	13	6	15	1	3	12	23	0	2	3	7	4	7
2020-06-28	jiangsu	120	104	16	win	25	39	14	0.641	13	31	18	0.419	31	41	10	0.756	5	12	7	0.417	31	56	25	0.554	13	30	0.698	0.406	17	7	21	6	33	27	7	15	6	15	4	4	12	20	0	2	1	1	5	11
2020-06-28	guangzhou	100	92	8	win	28	52	24	0.538	9	29	20	0.31	17	24	7	0.708	4	15	11	0.267	32	65	33	0.492	18	31	0.62	0.45	23	6	16	5	23	17	8	13	5	19	2	9	8	16	2	5	3	4	2	5
2020-06-28	guangsha	92	100	-8	lose	31	60	29	0.517	3	29	26	0.103	21	28	7	0.75	1	8	7	0.125	30	78	48	0.385	19	22	0.55	0.38	16	5	10	6	17	23	9	10	4	22	3	7	7	22	4	10	1	3	0	4
2020-06-28	guangdong	143	126	17	win	46	67	21	0.687	10	27	17	0.37	21	35	14	0.6	3	12	9	0.25	47	76	29	0.618	19	25	0.735	0.487	33	10	14	1	37	29	9	12	9	18	1	3	11	16	3	5	4	9	2	3
2020-06-28	fujian	126	143	-17	lose	23	44	21	0.523	17	29	12	0.586	29	39	10	0.744	6	10	4	0.6	31	60	29	0.517	9	20	0.513	0.265	19	12	22	5	29	37	7	11	13	23	5	11	9	17	1	4	1	2	4	7
2020-06-28	beijing	86	76	10	win	33	57	24	0.579	4	17	13	0.235	8	11	3	0.727	6	16	10	0.375	28	55	27	0.509	10	37	0.86	0.313	18	5	20	4	23	18	5	8	1	7	6	11	12	20	1	2	0	0	0	1
2020-06-29	zhejiang	111	107	4	win	24	49	25	0.49	14	36	22	0.389	21	29	8	0.724	5	11	6	0.455	31	72	41	0.431	14	24	0.667	0.35	25	6	13	1	30	29	9	10	11	26	3	10	6	15	2	5	0	0	0	0
2020-06-29	tianjin	98	126	-28	lose	19	45	26	0.422	10	24	14	0.417	30	33	3	0.909	9	14	5	0.643	15	50	35	0.3	8	19	0.613	0.211	20	10	23	1	28	25	5	6	11	22	3	9	3	12	0	2	2	5	0	1
2020-06-29	sichuan	77	95	-18	lose	19	43	24	0.442	7	19	12	0.368	18	33	15	0.545	6	13	7	0.462	17	46	29	0.37	6	22	0.71	0.162	16	11	16	3	24	31	3	3	4	13	1	6	4	14	2	7	2	3	3	8
2020-06-29	shandong	95	77	18	win	21	36	15	0.583	11	29	18	0.379	20	30	10	0.667	2	3	1	0.667	28	60	32	0.467	9	31	0.838	0.29	24	9	18	4	31	24	3	6	9	20	3	5	5	10	0	0	2	3	0	5
2020-06-29	qingdao	81	109	-28	lose	23	59	36	0.39	8	22	14	0.364	11	19	8	0.579	2	4	2	0.5	26	74	48	0.351	10	29	0.69	0.2	17	7	15	1	23	19	8	11	6	12	1	8	8	29	0	3	1	4	0	2
2020-06-29	liaoning	109	81	28	win	25	47	22	0.532	13	38	25	0.342	20	25	5	0.8	2	13	11	0.154	33	69	36	0.478	13	40	0.8	0.31	23	8	10	3	19	23	6	15	10	26	6	12	7	16	0	0	0	0	1	3
2020-06-29	guangzhou	107	111	-4	lose	29	54	25	0.537	8	19	11	0.421	25	30	5	0.833	2	5	3	0.4	34	67	33	0.507	12	26	0.65	0.333	14	7	15	3	29	30	4	8	5	14	8	11	14	27	4	7	1	2	3	8
2020-06-29	guangdong	126	98	28	win	41	55	14	0.745	7	23	16	0.304	23	33	10	0.697	6	16	10	0.375	40	60	20	0.667	12	30	0.789	0.387	27	15	16	3	25	28	20	27	4	16	2	2	4	7	3	5	3	5	2	3
2020-06-30	zhejiang	90	92	-2	lose	20	42	22	0.476	7	25	18	0.28	29	32	3	0.906	4	8	4	0.5	21	57	36	0.368	9	25	0.758	0.25	13	6	10	3	23	25	3	6	3	13	1	7	9	18	5	7	1	3	3	4
2020-06-30	xinjiang	76	83	-7	lose	16	47	31	0.34	10	32	22	0.313	14	18	4	0.778	5	18	13	0.278	20	60	40	0.333	8	32	0.8	0.16	17	9	15	2	25	17	3	14	6	15	0	2	2	8	2	10	5	11	0	2
2020-06-30	shenzhen	99	106	-7	lose	24	44	20	0.545	8	27	19	0.296	27	43	16	0.628	4	8	4	0.5	25	60	35	0.417	13	34	0.694	0.302	19	9	18	3	27	29	4	10	7	18	3	7	10	22	1	5	2	5	1	1
2020-06-30	shanxi	103	102	1	win	17	39	22	0.436	14	27	13	0.519	27	38	11	0.711	9	14	5	0.643	20	50	30	0.4	11	24	0.727	0.314	16	6	15	6	24	30	2	5	5	8	0	7	6	20	6	10	1	2	0	2
2020-06-30	shandong	102	103	-1	lose	30	53	23	0.566	7	21	14	0.333	21	30	9	0.7	5	9	4	0.556	29	62	33	0.468	9	24	0.686	0.273	25	7	15	3	30	24	7	10	6	13	0	7	5	16	1	1	2	6	1	1
2020-06-30	ningbo	83	76	7	win	24	46	22	0.522	5	22	17	0.227	20	31	11	0.645	4	13	9	0.308	24	54	30	0.444	8	42	0.84	0.2	12	9	18	6	17	25	6	8	4	18	2	7	7	16	1	3	3	8	1	2
2020-06-30	nanjing	107	120	-13	lose	34	62	28	0.548	4	24	20	0.167	27	31	4	0.871	7	25	18	0.28	29	59	30	0.492	14	29	0.707	0.318	10	5	13	2	22	26	6	8	0	10	1	4	7	25	0	0	2	4	7	20
2020-06-30	liaoning	120	107	13	win	36	61	25	0.59	10	29	19	0.345	18	26	8	0.692	8	18	10	0.444	34	68	34	0.5	12	30	0.682	0.293	25	7	12	0	26	22	7	10	9	27	2	6	7	18	1	1	1	1	3	7
2020-06-30	jilin	102	105	-3	lose	24	45	21	0.533	11	34	23	0.324	21	26	5	0.808	6	13	7	0.462	29	66	37	0.439	9	25	0.694	0.243	15	9	12	1	25	26	9	12	6	18	2	4	10	26	3	5	1	4	2	9
2020-06-30	jiangsu	105	102	3	win	34	52	18	0.654	5	23	18	0.217	22	33	11	0.667	3	10	7	0.3	32	61	29	0.525	11	28	0.757	0.306	10	4	16	8	26	25	8	10	2	15	3	5	14	23	2	6	2	2	3	6
2020-06-30	fujian	106	99	7	win	33	63	30	0.524	7	24	17	0.292	19	24	5	0.792	2	3	1	0.667	32	78	46	0.41	15	30	0.698	0.306	25	10	17	3	29	27	13	17	7	23	4	12	10	25	0	1	1	5	2	6
2020-06-30	beijing	92	90	2	win	27	48	21	0.563	7	25	18	0.28	17	19	2	0.895	4	13	9	0.308	29	59	30	0.492	8	27	0.75	0.242	18	4	13	0	25	23	2	3	6	21	3	9	11	25	2	5	4	7	2	3
2020-07-01	xinjiang	108	77	31	win	29	56	27	0.518	10	21	11	0.476	20	27	7	0.741	10	19	9	0.526	28	57	29	0.491	11	38	0.745	0.324	28	4	16	1	27	25	13	21	6	11	0	2	1	5	1	4	5	10	1	2
2020-07-01	sichuan	76	92	-16	lose	17	45	28	0.378	9	35	26	0.257	15	26	11	0.577	6	22	16	0.273	19	57	38	0.333	9	27	0.73	0.176	13	11	15	1	31	27	4	6	6	24	4	9	5	13	2	9	4	10	0	1
2020-07-01	shenzhen	92	76	16	win	25	40	15	0.625	5	20	15	0.25	27	41	14	0.659	4	14	10	0.286	21	41	20	0.512	10	42	0.824	0.27	20	6	23	3	27	31	6	13	4	12	0	0	3	7	1	4	8	10	3	5
2020-07-01	shanghai	77	108	-31	lose	28	65	37	0.431	3	21	18	0.143	12	27	15	0.444	5	18	13	0.278	25	67	42	0.373	13	23	0.676	0.255	8	8	10	1	25	27	2	6	3	16	3	8	14	32	0	2	4	9	0	3
2020-07-01	qingdao	88	100	-12	lose	22	41	19	0.537	8	22	14	0.364	20	23	3	0.87	3	11	8	0.273	25	50	25	0.5	12	28	0.636	0.375	22	7	33	2	21	22	6	9	5	10	4	6	6	12	1	7	1	2	0	3
2020-07-01	jiangsu	96	107	-11	lose	28	56	28	0.5	7	34	27	0.206	19	25	6	0.76	2	11	9	0.182	28	74	46	0.378	20	30	0.75	0.408	18	11	25	1	27	24	6	11	3	22	3	9	6	14	2	9	2	5	0	4
2020-07-01	guangzhou	72	96	-24	lose	23	56	33	0.411	4	23	19	0.174	14	22	8	0.636	1	5	4	0.2	26	74	48	0.351	10	19	0.633	0.2	19	8	12	1	26	22	0	3	6	17	4	9	8	22	0	0	1	3	4	12
2020-07-01	guangsha	100	88	12	win	25	50	25	0.5	12	34	22	0.353	14	22	8	0.636	5	18	13	0.278	30	64	34	0.469	16	20	0.625	0.364	23	20	20	2	22	21	9	12	7	26	1	2	4	9	3	5	0	4	3	7
2020-07-01	guangdong	136	91	45	win	36	50	14	0.72	11	30	19	0.367	31	43	12	0.721	4	12	8	0.333	36	61	25	0.59	12	32	0.744	0.3	32	9	12	5	24	30	9	17	8	19	5	6	16	19	5	8	1	4	1	2
2020-07-01	fujian	107	96	11	win	29	53	24	0.547	12	31	19	0.387	13	24	11	0.542	6	12	6	0.5	32	69	37	0.464	10	29	0.592	0.25	19	11	22	1	24	27	10	12	8	25	5	7	5	10	3	4	2	4	2	5
2020-07-01	beikong	91	136	-45	lose	26	57	31	0.456	7	31	24	0.226	18	24	6	0.75	6	17	11	0.353	25	69	44	0.362	11	28	0.7	0.256	23	4	18	3	30	24	6	13	7	24	3	11	6	16	0	1	1	3	1	4
2020-07-01	beijing	96	72	24	win	27	42	15	0.643	8	22	14	0.364	18	24	6	0.75	3	8	5	0.375	28	52	24	0.538	11	40	0.8	0.367	21	4	24	6	22	26	4	5	6	17	2	4	11	18	2	4	1	1	6	11
2020-07-02	zhejiang	114	97	17	win	29	56	27	0.518	9	24	15	0.375	29	35	6	0.829	7	19	12	0.368	28	58	30	0.483	14	31	0.816	0.35	23	9	12	6	20	27	10	14	6	15	6	10	9	18	2	6	0	2	1	1
2020-07-02	tianjin	79	97	-18	lose	17	44	27	0.386	7	26	19	0.269	24	31	7	0.774	3	11	8	0.273	19	57	38	0.333	16	27	0.9	0.356	20	11	24	1	26	25	2	7	7	19	1	7	5	11	2	6	2	3	0	1
2020-07-02	sichuan	73	78	-5	lose	19	37	18	0.514	7	29	22	0.241	14	29	15	0.483	5	16	11	0.313	18	47	29	0.383	12	28	0.718	0.279	18	7	18	2	29	25	3	5	3	18	5	8	6	11	1	3	1	2	1	2
2020-07-02	shanxi	97	79	18	win	27	44	17	0.614	9	23	14	0.391	16	23	7	0.696	3	10	7	0.3	31	55	24	0.564	3	29	0.644	0.1	27	11	18	6	25	26	8	10	6	17	1	6	4	11	4	9	4	4	2	3
2020-07-02	shanghai	126	83	43	win	33	53	20	0.623	15	24	9	0.625	15	20	5	0.75	1	3	2	0.333	43	70	27	0.614	9	36	0.8	0.3	29	12	16	4	19	21	17	22	10	15	2	6	11	24	0	2	2	3	2	3
2020-07-02	qingdao	83	126	-43	lose	29	57	28	0.509	5	26	21	0.192	10	11	1	0.909	0	0	0	0	31	80	49	0.388	9	21	0.7	0.2	10	5	17	4	21	19	6	10	4	17	6	14	14	38	0	3	0	0	1	4
2020-07-02	nanjing	97	114	-17	lose	23	40	17	0.575	12	35	23	0.343	15	19	4	0.789	4	16	12	0.25	26	54	28	0.481	7	26	0.65	0.184	19	6	19	0	27	20	7	8	10	24	5	10	10	20	1	4	1	2	2	8
2020-07-02	liaoning	110	125	-15	lose	37	53	16	0.698	8	27	19	0.296	12	17	5	0.706	3	9	6	0.333	40	69	29	0.58	7	27	0.675	0.206	25	7	21	3	25	22	12	13	5	20	3	7	12	16	0	1	0	2	4	5
2020-07-02	guangsha	125	110	15	win	35	60	25	0.583	10	29	19	0.345	25	31	6	0.806	1	9	8	0.111	40	76	36	0.526	13	27	0.794	0.325	18	11	17	3	22	25	7	11	5	19	5	7	8	17	5	8	2	3	1	5
2020-07-02	beikong	78	73	5	win	21	49	28	0.429	6	27	21	0.222	18	26	8	0.692	3	11	8	0.273	19	60	41	0.317	11	31	0.721	0.282	18	10	19	4	25	29	5	6	5	16	3	5	8	16	2	8	1	4	3	12
2020-07-03	xinjiang	99	85	14	win	25	48	23	0.521	13	34	21	0.382	10	13	3	0.769	16	43	27	0.372	21	38	17	0.553	6	34	0.708	0.15	29	10	10	6	26	17	13	21	15	38	2	4	3	4	1	6	2	2	0	0
2020-07-03	shandong	80	91	-11	lose	23	49	26	0.469	9	25	16	0.36	7	14	7	0.5	7	13	6	0.538	25	61	36	0.41	6	29	0.763	0.167	24	3	16	5	28	14	7	12	5	17	2	6	3	9	5	7	6	13	0	3
2020-07-03	ningbo	75	95	-20	lose	21	51	30	0.412	5	18	13	0.278	18	28	10	0.643	4	12	8	0.333	17	52	35	0.327	10	31	0.689	0.233	12	8	18	3	19	25	2	6	4	14	2	9	9	22	0	0	6	11	2	7
2020-07-03	nanjing	85	99	-14	lose	26	56	30	0.464	7	27	20	0.259	12	21	9	0.571	7	24	17	0.292	23	56	33	0.411	14	34	0.85	0.292	21	4	16	2	17	26	1	4	6	19	2	6	8	21	0	5	4	7	3	5
2020-07-03	jilin	91	80	11	win	25	46	21	0.543	7	26	19	0.269	20	27	7	0.741	7	18	11	0.389	24	53	29	0.453	9	30	0.833	0.237	16	9	12	1	14	28	8	12	5	23	4	6	9	17	2	2	0	1	0	2
2020-07-03	jiangsu	81	129	-48	lose	24	43	19	0.558	5	28	23	0.179	18	22	4	0.818	4	14	10	0.286	23	55	32	0.418	5	24	0.6	0.128	20	9	27	0	31	25	12	16	2	19	2	5	5	14	2	5	0	1	1	3
2020-07-03	guangdong	129	81	48	win	37	54	17	0.685	10	28	18	0.357	25	34	9	0.735	7	18	11	0.389	34	58	24	0.586	16	34	0.872	0.4	33	14	22	4	25	31	13	20	10	23	3	6	6	10	3	6	1	2	0	0
2020-07-03	beijing	95	75	20	win	22	51	29	0.431	13	29	16	0.448	12	16	4	0.75	4	8	4	0.5	30	71	41	0.423	14	33	0.767	0.311	21	7	13	8	25	19	8	9	5	18	1	3	8	20	4	10	1	5	3	6
2020-07-04	zhejiang	109	98	11	win	28	46	18	0.609	14	34	20	0.412	11	17	6	0.647	8	19	11	0.421	31	58	27	0.534	10	31	0.646	0.286	32	9	18	10	29	22	8	13	7	17	8	13	8	18	4	10	2	2	1	3
2020-07-04	tianjin	83	97	-14	lose	21	52	31	0.404	7	26	19	0.269	20	22	2	0.909	4	15	11	0.267	21	60	39	0.35	11	21	0.525	0.239	20	15	17	1	27	25	3	7	6	25	3	12	3	11	1	2	1	3	1	4
2020-07-04	sichuan	84	105	-21	lose	20	51	31	0.392	12	30	18	0.4	8	16	8	0.5	3	8	5	0.375	28	72	44	0.389	13	41	0.759	0.25	21	3	20	1	26	18	5	6	8	15	1	5	5	14	1	8	3	9	1	3
2020-07-04	shanghai	105	101	4	win	29	55	26	0.527	9	31	22	0.29	20	31	11	0.645	6	21	15	0.286	28	61	33	0.459	16	28	0.7	0.364	20	4	12	4	22	27	2	3	6	26	3	9	11	21	0	1	0	1	3	4
2020-07-04	guangzhou	101	105	-4	lose	27	54	27	0.5	11	26	15	0.423	14	18	4	0.778	6	16	10	0.375	30	62	32	0.484	12	28	0.636	0.3	19	2	13	2	27	22	5	6	8	20	5	10	10	20	1	4	3	5	5	11
2020-07-04	guangsha	98	109	-11	lose	32	67	35	0.478	4	19	15	0.211	22	31	9	0.71	3	11	8	0.273	26	68	42	0.382	17	25	0.714	0.354	16	7	16	4	22	29	3	12	2	6	1	7	9	21	4	7	2	4	3	8
2020-07-04	fujian	105	84	21	win	26	54	28	0.481	10	34	24	0.294	23	29	6	0.793	3	12	9	0.25	28	71	43	0.394	13	39	0.75	0.241	24	9	8	1	18	26	10	15	6	22	1	7	6	15	0	3	4	6	0	1
2020-07-04	beikong	97	83	14	win	33	55	22	0.6	5	23	18	0.217	16	24	8	0.667	1	7	6	0.143	30	64	34	0.469	19	35	0.761	0.475	26	8	21	2	25	27	6	7	8	24	6	15	4	12	2	3	1	2	0	4
2020-07-07	xinjiang	106	105	1	win	37	53	16	0.698	7	26	19	0.269	11	18	7	0.611	1	3	2	0.333	39	72	33	0.542	12	28	0.8	0.333	29	6	16	4	16	16	14	19	6	22	2	4	1	4	0	4	0	1	0	0
2020-07-07	jilin	105	106	-1	lose	25	49	24	0.51	15	32	17	0.469	10	14	4	0.714	1	1	0	1	37	78	41	0.474	7	24	0.667	0.2	24	9	10	1	16	16	3	6	11	27	1	7	13	23	4	7	0	1	2	4
2020-07-08	shenzhen	102	97	5	win	27	63	36	0.429	10	21	11	0.476	18	36	18	0.5	5	8	3	0.625	26	70	44	0.371	9	28	0.596	0.176	27	7	11	3	24	28	2	8	6	10	2	6	7	23	5	10	2	4	2	10
2020-07-08	qingdao	111	114	-3	lose	32	58	26	0.552	7	17	10	0.412	26	36	10	0.722	1	5	4	0.2	35	67	32	0.522	3	38	0.745	0.091	29	7	21	1	19	31	7	9	7	12	6	11	7	17	0	1	3	4	1	8
2020-07-08	nanjing	97	102	-5	lose	27	50	23	0.54	9	34	25	0.265	16	23	7	0.696	3	7	4	0.429	30	74	44	0.405	19	42	0.824	0.404	21	5	21	7	28	24	6	7	8	24	3	10	10	26	1	4	1	3	3	8
2020-07-08	liaoning	114	91	23	win	29	60	31	0.483	14	26	12	0.538	14	18	4	0.778	9	18	9	0.5	34	68	34	0.5	15	34	0.773	0.375	19	4	11	3	20	19	7	8	10	20	1	8	10	25	1	4	1	5	3	7
2020-07-08	jiangsu	91	114	-23	lose	28	61	33	0.459	7	25	18	0.28	14	17	3	0.824	7	16	9	0.438	27	69	42	0.391	10	25	0.625	0.227	18	9	11	3	19	20	8	13	2	11	2	9	9	30	2	5	0	1	3	5
2020-07-08	guangdong	114	111	3	win	30	57	27	0.526	13	38	25	0.342	15	21	6	0.714	4	19	15	0.211	35	72	37	0.486	13	30	0.909	0.255	32	8	17	2	31	19	13	15	13	36	2	4	7	13	0	3	1	2	1	5
2020-07-09	zhejiang	107	74	33	win	31	60	29	0.517	10	29	19	0.345	15	23	8	0.652	2	6	4	0.333	37	81	44	0.457	16	30	0.833	0.348	21	12	10	4	21	24	8	13	4	17	5	9	11	18	3	6	1	3	2	3
2020-07-09	tianjin	88	129	-41	lose	12	42	30	0.286	17	42	25	0.405	13	16	3	0.813	13	23	10	0.565	15	60	45	0.25	13	22	0.647	0.265	20	10	24	1	28	19	2	7	10	30	3	7	1	8	4	9	2	7	1	5
2020-07-09	sichuan	74	107	-33	lose	16	38	22	0.421	9	24	15	0.375	15	22	7	0.682	3	9	6	0.333	21	52	31	0.404	6	30	0.652	0.167	15	5	25	3	24	21	0	4	2	10	1	6	8	14	3	7	2	7	0	0
2020-07-09	shandong	84	100	-16	lose	24	47	23	0.511	6	16	10	0.375	18	30	12	0.6	3	8	5	0.375	26	54	28	0.481	8	34	0.68	0.235	14	8	32	9	27	27	12	14	3	14	4	9	6	12	2	3	0	2	1	2
2020-07-09	guangzhou	102	106	-4	lose	28	57	29	0.491	7	15	8	0.467	25	36	11	0.694	1	6	5	0.167	29	61	32	0.475	11	26	0.743	0.282	24	7	18	3	33	32	3	7	5	11	3	10	10	17	1	1	1	3	4	6
2020-07-09	guangsha	100	84	16	win	33	70	37	0.471	5	20	15	0.25	19	26	7	0.731	3	14	11	0.214	33	74	41	0.446	16	26	0.765	0.32	19	12	19	4	27	27	10	13	2	15	3	6	8	20	1	9	1	3	1	5
2020-07-09	fujian	129	88	41	win	39	59	20	0.661	10	25	15	0.4	21	33	12	0.636	3	12	9	0.25	41	67	26	0.612	12	36	0.735	0.353	35	13	18	6	19	28	17	21	9	21	3	5	10	16	2	6	1	2	4	5
2020-07-09	beikong	106	102	4	win	25	51	26	0.49	7	17	10	0.412	35	44	9	0.795	3	5	2	0.6	27	61	34	0.443	9	28	0.718	0.257	19	13	16	1	32	33	5	5	4	16	2	5	5	12	1	2	0	0	3	9
2020-07-10	xinjiang	104	71	33	win	27	58	31	0.466	10	25	15	0.4	20	27	7	0.741	3	9	6	0.333	31	71	40	0.437	14	48	0.857	0.359	25	8	22	3	30	26	11	18	4	16	1	6	5	13	2	3	5	14	3	4
2020-07-10	shanxi	71	104	-33	lose	21	57	36	0.368	1	20	19	0.05	26	40	14	0.65	2	7	5	0.286	15	65	50	0.231	8	25	0.641	0.143	5	7	13	5	26	30	5	9	0	9	1	4	8	16	3	9	4	11	1	5
2020-07-10	shanghai	89	122	-33	lose	20	48	28	0.417	11	27	16	0.407	16	17	1	0.941	4	8	4	0.5	26	66	40	0.394	7	23	0.697	0.194	19	5	23	3	21	18	4	6	7	21	4	10	9	26	3	5	1	1	3	7
2020-07-10	ningbo	94	83	11	win	31	61	30	0.508	6	13	7	0.462	14	20	6	0.7	2	4	2	0.5	34	69	35	0.493	9	31	0.838	0.231	19	11	16	5	20	22	2	4	7	13	4	9	8	16	0	1	6	18	3	5
2020-07-10	jilin	64	91	-27	lose	22	48	26	0.458	4	23	19	0.174	8	14	6	0.571	0	7	7	0	24	62	38	0.387	11	23	0.622	0.25	10	6	19	1	26	18	1	7	2	12	2	5	13	23	2	6	0	2	4	7
2020-07-10	jiangsu	83	94	-11	lose	23	50	27	0.46	8	20	12	0.4	13	18	5	0.722	3	8	5	0.375	28	62	34	0.452	6	30	0.769	0.162	14	7	17	4	22	20	7	16	3	5	1	5	6	19	2	5	4	6	3	6
2020-07-10	guangdong	122	89	33	win	45	73	28	0.616	4	8	4	0.5	20	25	5	0.8	2	3	1	0.667	44	75	31	0.587	10	29	0.806	0.303	24	11	12	3	18	21	13	24	5	8	2	6	16	25	4	4	3	5	3	4
2020-07-10	beijing	91	64	27	win	26	47	21	0.553	9	29	20	0.31	12	20	8	0.6	3	7	4	0.429	28	65	37	0.431	14	33	0.75	0.378	22	9	19	5	18	26	2	2	8	25	2	10	10	23	3	8	1	3	3	4
2020-07-11	tianjin	107	116	-9	lose	32	44	12	0.727	10	34	24	0.294	13	18	5	0.722	6	16	10	0.375	32	58	26	0.552	5	31	0.674	0.143	28	5	20	2	24	16	4	7	9	31	3	4	9	13	1	2	7	10	6	9
2020-07-11	sichuan	76	91	-15	lose	16	42	26	0.381	11	34	23	0.324	11	19	8	0.579	1	9	8	0.111	23	64	41	0.359	14	29	0.63	0.333	21	9	19	2	30	17	4	11	10	27	2	8	4	13	2	5	1	3	1	3
2020-07-11	shenzhen	74	81	-7	lose	20	51	31	0.392	3	17	14	0.176	25	37	12	0.676	2	6	4	0.333	21	62	41	0.339	7	29	0.744	0.167	13	7	11	2	25	32	5	12	0	7	2	7	5	12	3	7	0	6	1	2
2020-07-11	shandong	98	123	-25	lose	22	48	26	0.458	11	21	10	0.524	21	34	13	0.618	9	11	2	0.818	20	54	34	0.37	12	22	0.629	0.353	21	11	29	5	25	28	13	15	4	13	2	6	2	10	1	6	2	6	2	2
2020-07-11	qingdao	81	74	7	win	20	53	33	0.377	8	24	16	0.333	17	25	8	0.68	2	5	3	0.4	24	70	46	0.343	10	35	0.833	0.256	13	6	14	4	32	25	8	11	2	12	4	8	9	21	1	4	0	1	2	5
2020-07-11	nanjing	116	107	9	win	36	57	21	0.632	9	36	27	0.25	17	25	8	0.68	3	10	7	0.3	39	80	41	0.488	15	30	0.857	0.326	19	12	10	0	16	24	4	7	9	26	2	5	22	35	3	3	1	3	9	20
2020-07-11	liaoning	123	98	25	win	30	49	19	0.612	16	31	15	0.516	15	25	10	0.6	4	10	6	0.4	37	65	28	0.569	13	22	0.647	0.371	28	17	21	1	28	25	12	15	7	17	3	5	5	13	3	6	2	4	1	4
2020-07-11	guangzhou	111	123	-12	lose	25	55	30	0.455	14	34	20	0.412	19	26	7	0.731	8	16	8	0.5	29	71	42	0.408	9	29	0.744	0.196	26	6	13	3	29	24	7	10	11	25	3	8	9	20	1	2	1	4	2	5
2020-07-11	guangsha	91	76	15	win	20	52	32	0.385	8	25	17	0.32	27	34	7	0.794	1	5	4	0.2	26	71	45	0.366	17	28	0.667	0.37	15	9	13	4	17	30	5	7	7	20	4	9	9	23	0	4	1	1	1	5
2020-07-11	fujian	123	111	12	win	23	43	20	0.535	15	33	18	0.455	32	41	9	0.78	4	9	5	0.444	29	62	33	0.468	10	37	0.804	0.256	26	5	18	0	24	29	10	17	7	17	2	5	6	13	2	5	2	5	0	1
2020-07-12	zhejiang	95	88	7	win	23	51	28	0.451	9	28	19	0.321	22	32	10	0.688	2	7	5	0.286	29	71	42	0.408	12	29	0.784	0.261	20	14	15	4	24	28	9	12	3	16	4	6	7	15	2	7	0	1	2	4
2020-07-12	shanghai	97	104	-7	lose	20	38	18	0.526	13	36	23	0.361	18	30	12	0.6	2	8	6	0.25	27	62	35	0.435	13	31	0.738	0.31	16	1	20	4	22	30	1	1	9	25	3	7	10	19	3	3	0	3	1	2
2020-07-12	ningbo	108	116	-8	lose	25	52	27	0.481	10	26	16	0.385	28	38	10	0.737	10	33	23	0.303	21	41	20	0.512	16	35	0.745	0.381	15	4	26	4	24	33	3	9	10	27	4	7	9	15	0	3	3	5	6	12
2020-07-12	jilin	88	95	-7	lose	29	53	24	0.547	4	15	11	0.267	18	26	8	0.692	3	6	3	0.5	28	60	32	0.467	8	34	0.739	0.216	13	7	23	1	28	24	3	7	4	7	6	13	13	24	0	5	2	6	3	5
2020-07-12	guangdong	116	108	8	win	37	74	37	0.5	8	17	9	0.471	18	24	6	0.75	9	18	9	0.5	30	67	37	0.448	12	26	0.619	0.255	26	16	9	3	33	24	8	13	8	13	2	5	12	27	3	6	2	4	4	9
2020-07-12	beikong	104	97	7	win	31	62	31	0.5	7	19	12	0.368	21	26	5	0.808	2	7	5	0.286	32	70	38	0.457	11	29	0.69	0.262	12	9	13	1	30	22	4	6	4	13	4	9	9	25	3	9	0	1	7	10
2020-07-13	xinjiang	122	86	36	win	37	60	23	0.617	9	24	15	0.375	21	26	5	0.808	5	15	10	0.333	39	67	28	0.582	11	38	0.884	0.367	29	10	15	4	26	24	11	18	6	15	2	3	6	12	2	4	7	8	2	4
2020-07-13	tianjin	78	133	-55	lose	16	49	33	0.327	11	30	19	0.367	13	21	8	0.619	11	29	18	0.379	15	49	34	0.306	12	21	0.778	0.235	19	7	20	1	18	19	3	6	4	22	3	8	3	18	4	8	1	3	0	7
2020-07-13	shenzhen	86	122	-36	lose	24	46	22	0.522	8	28	20	0.286	14	24	10	0.583	2	9	7	0.222	28	63	35	0.444	5	19	0.633	0.116	21	7	17	4	24	26	4	6	7	20	5	12	5	15	4	6	1	3	2	6
2020-07-13	shanxi	91	111	-20	lose	24	56	32	0.429	6	18	12	0.333	25	34	9	0.735	3	8	5	0.375	21	60	39	0.35	11	27	0.771	0.244	12	6	14	4	19	28	3	6	4	10	2	6	7	20	4	9	3	14	4	9
2020-07-13	shandong	125	110	15	win	41	61	20	0.672	10	29	19	0.345	13	19	6	0.684	1	11	10	0.091	45	74	29	0.608	19	35	0.814	0.5	30	5	20	2	27	19	6	9	10	26	2	7	5	7	1	1	2	8	2	4
2020-07-13	qingdao	85	114	-29	lose	24	52	28	0.462	5	26	21	0.192	22	28	6	0.786	5	9	4	0.556	23	68	45	0.338	14	29	0.829	0.326	10	6	18	4	19	24	4	7	4	13	2	8	7	25	0	3	1	2	1	6
2020-07-13	nanjing	110	125	-15	lose	30	57	27	0.526	9	29	20	0.31	23	32	9	0.719	1	3	2	0.333	32	77	45	0.416	8	19	0.5	0.186	9	13	9	0	19	27	9	16	2	11	5	11	13	29	0	2	0	1	10	14
2020-07-13	liaoning	133	78	55	win	32	42	10	0.762	19	38	19	0.5	12	14	2	0.857	17	32	15	0.531	34	48	14	0.708	6	39	0.765	0.222	37	14	15	1	19	18	14	18	14	30	3	4	9	13	3	3	2	3	3	4
2020-07-13	jiangsu	114	85	29	win	26	44	18	0.591	15	33	18	0.455	17	22	5	0.773	6	12	6	0.5	33	63	30	0.524	6	29	0.674	0.171	19	6	13	0	24	19	4	4	7	21	2	5	9	17	1	2	2	2	2	8
2020-07-13	beijing	111	91	20	win	26	49	23	0.531	15	29	14	0.517	14	17	3	0.824	8	13	5	0.615	29	61	32	0.475	8	34	0.756	0.229	25	7	11	2	28	19	3	6	8	13	0	3	14	26	2	4	1	4	3	4
2020-07-14	sichuan	78	88	-10	lose	24	52	28	0.462	8	29	21	0.276	6	12	6	0.5	9	25	16	0.36	20	53	33	0.377	15	23	0.605	0.319	18	6	13	1	20	17	5	8	8	21	3	10	11	31	1	5	1	1	1	3
2020-07-14	shanghai	88	78	10	win	27	50	23	0.54	8	23	15	0.348	10	13	3	0.769	5	17	12	0.294	29	55	26	0.527	15	32	0.681	0.395	15	5	16	4	17	20	5	6	8	20	4	9	14	28	0	0	1	2	1	1
2020-07-14	ningbo	105	113	-8	lose	23	53	30	0.434	12	27	15	0.444	23	29	6	0.793	7	18	11	0.389	25	59	34	0.424	13	25	0.781	0.342	17	7	16	4	29	24	3	9	5	20	5	12	8	22	2	3	5	8	2	7
2020-07-14	guangzhou	99	121	-22	lose	26	55	29	0.473	7	22	15	0.318	26	30	4	0.867	2	7	5	0.286	26	65	39	0.4	10	27	0.692	0.244	18	13	25	5	19	33	12	20	7	13	2	6	4	17	1	5	4	7	0	5
2020-07-14	guangsha	113	105	8	win	32	58	26	0.552	8	15	7	0.533	25	35	10	0.714	6	13	7	0.462	30	56	26	0.536	7	25	0.658	0.219	20	10	17	4	24	29	10	17	3	10	0	2	10	17	8	12	1	2	3	5
2020-07-14	guangdong	121	99	22	win	33	54	21	0.611	15	36	21	0.417	10	16	6	0.625	3	7	4	0.429	39	77	38	0.506	12	31	0.756	0.308	34	14	23	4	33	19	17	26	9	20	4	8	7	17	4	7	3	3	0	0
2020-07-15	zhejiang	136	107	29	win	38	61	23	0.623	12	30	18	0.4	24	28	4	0.857	6	14	8	0.429	39	72	33	0.542	18	32	0.78	0.462	26	7	15	5	31	25	11	15	6	16	5	8	10	17	3	6	1	4	1	4
2020-07-15	xinjiang	104	86	18	win	28	42	14	0.667	10	33	23	0.303	18	23	5	0.783	6	11	5	0.545	29	61	32	0.475	8	34	0.708	0.25	24	6	18	4	27	23	9	12	7	21	1	2	10	14	2	7	3	6	1	2
2020-07-15	tianjin	108	113	-5	lose	25	40	15	0.625	9	27	18	0.333	31	37	6	0.838	7	14	7	0.5	22	48	26	0.458	4	24	0.615	0.143	23	8	15	1	26	26	5	6	9	20	2	7	8	14	5	8	1	1	0	1
2020-07-15	shanxi	100	115	-15	lose	30	60	30	0.5	6	21	15	0.286	22	33	11	0.667	3	8	5	0.375	27	67	40	0.403	11	29	0.744	0.256	23	6	20	3	25	28	6	11	9	20	4	17	7	19	1	3	2	7	1	3
2020-07-15	qingdao	113	108	5	win	28	53	25	0.528	10	27	17	0.37	27	32	5	0.844	7	11	4	0.636	29	67	38	0.433	15	24	0.857	0.385	26	4	12	0	26	26	8	14	9	24	4	14	4	14	1	2	0	0	0	0
2020-07-15	nanjing	115	100	15	win	29	51	22	0.569	13	32	19	0.406	18	27	9	0.667	2	6	4	0.333	36	73	37	0.493	10	32	0.744	0.256	16	15	17	2	28	25	11	16	9	15	7	11	11	20	0	2	0	0	2	7
2020-07-15	liaoning	125	118	7	win	33	53	20	0.623	15	27	12	0.556	14	22	8	0.636	2	5	3	0.4	41	70	29	0.586	8	30	0.833	0.229	28	6	16	3	18	17	7	10	8	17	4	8	9	18	3	3	2	5	3	4
2020-07-15	jilin	118	125	-7	lose	37	56	19	0.661	10	26	16	0.385	14	21	7	0.667	4	8	4	0.5	40	71	31	0.563	6	27	0.771	0.167	21	9	13	2	17	18	14	19	3	9	6	9	13	21	4	9	2	5	1	2
2020-07-15	fujian	107	136	-29	lose	32	56	24	0.571	6	25	19	0.24	25	32	7	0.781	4	13	9	0.308	30	64	34	0.469	9	21	0.538	0.22	15	10	12	2	25	31	8	12	3	15	5	10	15	25	1	4	2	4	4	8
2020-07-15	beikong	86	104	-18	lose	23	55	32	0.418	3	22	19	0.136	31	38	7	0.816	2	13	11	0.154	21	61	40	0.344	14	24	0.75	0.292	9	11	15	1	23	27	5	8	2	13	2	4	7	24	1	8	0	4	2	8
2020-07-16	shenzhen	81	90	-9	lose	25	56	31	0.446	4	10	6	0.4	19	31	12	0.613	3	8	5	0.375	23	55	32	0.418	11	25	0.714	0.275	7	5	12	4	19	27	2	4	1	4	7	11	13	28	0	1	4	9	0	2
2020-07-16	jiangsu	100	107	-7	lose	31	58	27	0.534	8	34	26	0.235	14	25	11	0.56	4	10	6	0.4	30	77	47	0.39	13	26	0.65	0.277	17	9	8	1	24	24	2	7	7	21	2	7	10	21	2	5	2	6	4	12
2020-07-16	guangzhou	107	100	7	win	32	58	26	0.552	7	21	14	0.333	22	27	5	0.815	4	10	6	0.4	33	67	34	0.493	14	34	0.723	0.35	27	3	13	7	24	24	2	4	8	19	7	12	9	21	4	6	4	7	1	3
2020-07-16	guangsha	97	104	-7	lose	20	45	25	0.444	9	24	15	0.375	30	35	5	0.857	6	11	5	0.545	19	54	35	0.352	12	27	0.54	0.316	18	10	22	2	27	32	5	8	8	20	3	8	7	16	0	1	1	3	0	5
2020-07-16	guangdong	104	97	7	win	28	64	36	0.438	11	31	20	0.355	15	25	10	0.6	5	13	8	0.385	31	79	48	0.392	23	26	0.684	0.46	19	13	15	8	32	27	10	20	8	19	2	4	7	21	2	6	1	3	1	3
2020-07-16	beijing	90	81	9	win	28	46	18	0.609	7	27	20	0.259	13	15	2	0.867	9	17	8	0.529	25	55	30	0.455	10	29	0.725	0.286	15	6	12	5	27	19	3	6	5	16	2	6	10	21	7	11	4	5	1	4
2020-07-17	xinjiang	107	94	13	win	26	50	24	0.52	13	25	12	0.52	16	21	5	0.762	9	14	5	0.643	27	58	31	0.466	10	37	0.755	0.286	27	9	22	7	15	23	11	18	9	19	1	5	4	10	1	2	4	8	0	3
2020-07-17	shanghai	97	90	7	win	24	66	42	0.364	10	19	9	0.526	19	21	2	0.905	11	24	13	0.458	22	60	38	0.367	14	33	0.717	0.298	20	7	10	5	22	22	10	15	9	14	1	3	8	29	1	5	2	5	0	3
2020-07-17	shandong	94	107	-13	lose	27	58	31	0.466	10	29	19	0.345	10	12	2	0.833	6	16	10	0.375	25	65	40	0.385	12	25	0.714	0.245	22	12	16	1	23	15	9	17	3	12	2	6	6	15	3	6	1	8	1	3
2020-07-17	qingdao	95	91	4	win	21	45	24	0.467	11	26	15	0.423	20	25	5	0.8	4	5	1	0.8	28	66	38	0.424	10	25	0.581	0.263	23	7	11	0	24	22	5	7	5	13	1	7	5	18	1	5	0	2	2	3
2020-07-17	ningbo	90	97	-7	lose	26	65	39	0.4	6	16	10	0.375	20	23	3	0.87	8	17	9	0.471	21	61	40	0.344	13	33	0.702	0.283	18	7	14	5	22	22	3	7	9	21	3	5	6	17	0	3	5	12	4	5
2020-07-17	nanjing	111	95	16	win	42	70	28	0.6	5	22	17	0.227	12	16	4	0.75	0	5	5	0	41	81	40	0.506	21	34	0.791	0.457	18	8	12	6	22	20	8	11	3	14	3	7	10	21	1	2	4	6	4	13
2020-07-17	liaoning	121	101	20	win	28	56	28	0.5	17	40	23	0.425	14	17	3	0.824	11	22	11	0.5	31	71	40	0.437	13	40	0.816	0.317	24	7	13	0	24	25	2	7	14	27	3	10	8	15	2	4	3	7	4	6
2020-07-17	jilin	95	111	-16	lose	24	47	23	0.511	12	39	27	0.308	11	20	9	0.55	2	12	10	0.167	32	72	40	0.444	9	25	0.543	0.209	21	9	11	3	20	22	6	10	11	32	6	18	5	10	0	4	0	1	2	4
2020-07-17	fujian	101	121	-20	lose	27	56	29	0.482	11	30	19	0.367	14	20	6	0.7	8	22	14	0.364	25	59	34	0.424	9	28	0.683	0.184	23	4	14	1	25	24	8	13	7	15	3	9	10	23	3	6	2	5	3	6
2020-07-17	beikong	91	95	-4	lose	23	49	26	0.469	9	33	24	0.273	18	20	2	0.9	3	16	13	0.188	26	63	37	0.413	18	28	0.737	0.419	25	6	16	4	22	24	8	10	9	29	2	9	4	16	3	4	0	1	1	3
2020-07-18	zhejiang	90	74	16	win	25	49	24	0.51	8	20	12	0.4	16	20	4	0.8	2	5	3	0.4	31	64	33	0.484	3	31	0.816	0.1	21	9	21	6	23	22	6	8	3	8	4	6	9	18	2	2	0	1	1	1
2020-07-18	sichuan	76	96	-20	lose	22	49	27	0.449	8	28	20	0.286	8	16	8	0.5	4	16	12	0.25	22	57	35	0.386	7	27	0.844	0.146	15	7	13	1	19	22	6	10	4	19	6	11	10	19	1	6	3	8	2	3
2020-07-18	shanxi	74	90	-16	lose	26	62	36	0.419	3	11	8	0.273	13	19	6	0.684	0	3	3	0	27	68	41	0.397	7	27	0.9	0.184	18	8	18	4	22	23	3	7	2	8	4	7	7	17	5	8	4	11	0	1
2020-07-18	jiangsu	96	76	20	win	30	47	17	0.638	7	20	13	0.35	15	21	6	0.714	4	12	8	0.333	30	52	22	0.577	5	41	0.854	0.156	24	6	17	3	22	19	7	9	8	17	0	4	9	16	3	5	3	4	1	6
2020-07-18	guangzhou	81	105	-24	lose	24	55	31	0.436	9	20	11	0.45	6	6	0	1	2	7	5	0.286	29	66	37	0.439	7	24	0.632	0.179	19	6	17	0	23	11	2	5	6	16	3	8	7	18	1	1	2	7	2	8
2020-07-18	beijing	105	81	24	win	30	46	16	0.652	8	25	17	0.32	21	30	9	0.7	4	11	7	0.364	32	58	26	0.552	14	32	0.821	0.368	25	7	15	6	11	23	6	9	7	22	6	11	8	14	3	6	2	3	0	1
2020-07-19	tianjin	103	96	7	win	27	44	17	0.614	11	31	20	0.355	16	22	6	0.727	6	12	6	0.5	29	60	31	0.483	9	26	0.667	0.25	24	8	17	2	20	21	10	17	7	17	2	7	4	11	3	7	1	2	0	0
2020-07-19	shenzhen	94	87	7	win	31	53	22	0.585	8	24	16	0.333	8	25	17	0.32	7	23	16	0.304	25	47	22	0.532	9	33	0.717	0.225	22	11	22	2	23	22	11	15	5	16	4	9	6	13	3	3	0	3	5	8
2020-07-19	ningbo	96	103	-7	lose	28	53	25	0.528	10	32	22	0.313	10	12	2	0.833	2	8	6	0.25	34	75	41	0.453	13	27	0.75	0.333	24	13	18	2	21	20	10	16	7	25	4	9	7	14	2	4	3	5	2	3
2020-07-19	liaoning	123	106	17	win	29	40	11	0.725	16	38	22	0.421	17	21	4	0.81	2	11	9	0.182	38	62	24	0.613	8	27	0.75	0.235	28	9	13	2	19	24	7	7	13	30	1	4	3	12	0	0	7	10	1	3
2020-07-19	guangsha	87	94	-7	lose	26	50	24	0.52	7	30	23	0.233	14	24	10	0.583	10	30	20	0.333	21	48	27	0.438	13	31	0.775	0.283	19	12	22	1	22	23	5	9	8	27	2	4	6	11	1	3	3	5	3	7
2020-07-19	beikong	106	123	-17	lose	28	52	24	0.538	13	27	14	0.481	11	17	6	0.647	5	9	4	0.556	33	67	34	0.493	9	26	0.765	0.25	26	7	15	2	24	19	3	8	11	22	4	7	6	13	5	8	1	1	0	1
2020-07-20	zhejiang	98	107	-9	lose	21	41	20	0.512	8	27	19	0.296	32	38	6	0.842	3	4	1	0.75	23	61	38	0.377	10	25	0.676	0.313	18	11	26	2	33	32	11	11	10	21	0	5	4	11	0	1	0	0	2	5
2020-07-20	xinjiang	101	106	-5	lose	28	55	27	0.509	11	30	19	0.367	12	22	10	0.545	5	9	4	0.556	34	76	42	0.447	13	44	0.772	0.295	23	3	20	7	29	24	6	14	6	14	0	3	1	10	2	7	8	15	0	3
2020-07-20	sichuan	73	84	-11	lose	28	55	27	0.509	5	15	10	0.333	2	9	7	0.222	6	13	7	0.462	24	54	30	0.444	8	29	0.69	0.235	12	7	25	4	23	17	4	7	4	11	1	3	12	24	4	5	3	5	2	2
2020-07-20	shanxi	90	79	11	win	33	55	22	0.6	3	22	19	0.136	15	23	8	0.652	7	17	10	0.412	28	59	31	0.475	11	28	0.757	0.268	13	8	11	3	25	24	7	10	5	21	1	7	9	15	1	6	5	7	3	5
2020-07-20	shandong	92	101	-9	lose	23	45	22	0.511	12	29	17	0.414	10	13	3	0.769	9	16	7	0.563	25	57	32	0.439	6	34	0.773	0.176	17	7	19	3	22	20	5	10	7	17	1	2	6	14	3	6	0	5	1	4
2020-07-20	qingdao	79	90	-11	lose	27	54	27	0.5	4	19	15	0.211	13	22	9	0.591	5	10	5	0.5	22	59	37	0.373	9	30	0.732	0.243	14	5	18	2	24	25	6	12	3	11	4	9	11	24	1	1	3	8	2	5
2020-07-20	jiangsu	101	92	9	win	31	56	25	0.554	9	27	18	0.333	12	20	8	0.6	2	11	9	0.182	34	68	34	0.5	10	28	0.824	0.227	27	12	13	4	20	22	8	12	3	12	0	1	7	16	2	2	2	8	4	9
2020-07-20	guangdong	107	98	9	win	24	47	23	0.511	9	22	13	0.409	32	37	5	0.865	4	10	6	0.4	23	53	30	0.434	12	22	0.688	0.324	21	13	21	3	32	33	5	8	7	17	3	10	10	19	5	9	1	4	2	4
2020-07-20	fujian	106	101	5	win	20	58	38	0.345	16	35	19	0.457	18	25	7	0.72	4	12	8	0.333	31	80	49	0.388	13	31	0.705	0.228	14	8	8	5	24	29	4	13	5	19	5	9	8	26	1	3	0	2	4	11
2020-07-20	beijing	84	73	11	win	17	41	24	0.415	10	29	19	0.345	20	27	7	0.741	6	18	12	0.333	20	51	31	0.392	13	26	0.765	0.31	14	14	16	5	17	23	2	5	8	20	1	2	6	19	1	5	1	3	5	13
2020-07-21	tianjin	93	125	-32	lose	18	38	20	0.474	9	33	24	0.273	30	37	7	0.811	4	7	3	0.571	18	59	41	0.305	9	26	0.743	0.214	24	14	32	1	29	25	7	16	3	20	1	4	1	5	3	3	2	5	0	4
2020-07-21	shenzhen	93	107	-14	lose	32	62	30	0.516	7	22	15	0.318	8	12	4	0.667	5	12	7	0.417	30	68	38	0.441	9	29	0.707	0.225	20	4	18	6	22	18	8	10	6	19	4	9	8	17	1	2	5	11	0	1
2020-07-21	shanghai	107	93	14	win	34	60	26	0.567	9	29	20	0.31	12	18	6	0.667	4	8	4	0.5	36	78	42	0.462	12	31	0.775	0.293	17	13	13	6	18	22	8	9	6	18	5	12	10	20	2	2	1	5	3	3
2020-07-21	nanjing	108	110	-2	lose	24	52	28	0.462	10	36	26	0.278	30	34	4	0.882	3	7	4	0.429	29	79	50	0.367	10	31	0.646	0.222	14	12	12	5	23	23	5	9	5	21	3	5	12	28	0	2	3	5	7	18
2020-07-21	jilin	98	95	3	win	34	60	26	0.567	7	21	14	0.333	9	18	9	0.5	4	14	10	0.286	35	65	30	0.538	9	32	0.762	0.22	14	8	14	4	18	24	10	15	4	12	5	8	13	22	4	8	3	6	3	7
2020-07-21	guangzhou	95	98	-3	lose	30	57	27	0.526	7	21	14	0.333	14	18	4	0.778	6	9	3	0.667	29	67	38	0.433	10	32	0.78	0.238	16	6	15	2	24	18	8	11	7	15	8	11	10	23	1	4	2	5	2	8
2020-07-21	beikong	110	108	2	win	27	57	30	0.474	11	35	24	0.314	23	28	5	0.821	8	22	14	0.364	28	68	40	0.412	17	35	0.778	0.354	27	7	17	3	23	23	8	14	11	35	5	11	8	18	0	0	2	4	2	3
2020-07-22	zhejiang	102	85	17	win	25	42	17	0.595	11	35	24	0.314	19	25	6	0.76	11	28	17	0.393	24	48	24	0.5	10	28	0.718	0.27	26	16	13	3	20	22	8	13	11	31	5	10	3	9	0	1	0	0	0	0
2020-07-22	sichuan	101	84	17	win	30	54	24	0.556	7	18	11	0.389	20	27	7	0.741	7	21	14	0.333	27	48	21	0.563	5	35	0.897	0.161	22	5	16	2	23	24	8	10	4	12	5	8	9	15	3	7	1	4	1	2
2020-07-22	shanxi	105	108	-3	lose	33	53	20	0.623	8	22	14	0.364	15	21	6	0.714	1	2	1	0.5	36	69	33	0.522	4	25	0.758	0.118	30	7	16	2	22	20	4	7	13	19	3	6	11	24	7	10	4	8	1	2
2020-07-22	shandong	90	85	5	win	24	44	20	0.545	6	30	24	0.2	24	33	9	0.727	1	7	6	0.143	26	64	38	0.406	12	32	0.8	0.273	23	8	15	3	28	29	4	7	6	21	2	7	7	16	2	2	1	4	0	3
2020-07-22	qingdao	85	102	-17	lose	25	57	32	0.439	7	17	10	0.412	14	20	6	0.7	5	13	8	0.385	26	60	34	0.433	11	27	0.73	0.282	17	9	22	3	22	20	5	10	3	8	4	7	10	24	0	5	3	7	1	4
2020-07-22	ningbo	84	101	-17	lose	27	45	18	0.6	5	29	24	0.172	15	26	11	0.577	8	26	18	0.308	19	43	24	0.442	4	26	0.839	0.103	15	7	14	1	24	23	4	6	8	27	1	4	5	13	1	1	4	8	1	6
2020-07-22	liaoning	108	105	3	win	33	52	19	0.635	8	28	20	0.286	18	20	2	0.9	1	2	1	0.5	36	74	38	0.486	8	30	0.882	0.242	22	7	15	1	20	22	7	15	7	17	6	7	11	23	0	1	6	6	1	3
2020-07-22	jiangsu	85	90	-5	lose	22	47	25	0.468	8	29	21	0.276	17	23	6	0.739	4	13	9	0.308	24	61	37	0.393	8	32	0.727	0.2	8	5	16	5	29	28	9	13	2	15	1	3	9	24	0	4	0	1	5	7
2020-07-22	fujian	87	115	-28	lose	28	52	24	0.538	6	26	20	0.231	13	20	7	0.65	2	7	5	0.286	29	68	39	0.426	7	24	0.8	0.156	14	9	19	2	17	21	5	7	3	12	5	11	11	23	1	3	1	4	1	1
2020-07-22	beijing	115	87	28	win	29	44	15	0.659	15	31	16	0.484	12	17	5	0.706	3	13	10	0.231	38	59	21	0.644	6	38	0.844	0.2	30	12	17	1	21	17	8	10	10	24	3	7	8	17	4	7	4	6	0	1
2020-07-23	xinjiang	103	87	16	win	28	56	28	0.5	7	26	19	0.269	26	35	9	0.743	6	13	7	0.462	29	69	40	0.42	17	32	0.78	0.354	19	4	10	0	21	28	3	6	7	20	2	4	3	11	4	7	7	14	1	4
2020-07-23	nanjing	106	131	-25	lose	27	42	15	0.643	13	35	22	0.371	13	20	7	0.65	9	20	11	0.45	28	54	26	0.519	5	25	0.595	0.128	19	8	20	5	21	25	7	10	5	16	4	7	11	17	0	1	1	1	9	13
2020-07-23	jilin	96	119	-23	lose	28	48	20	0.583	7	28	21	0.25	19	26	7	0.731	1	7	6	0.143	32	67	35	0.478	13	25	0.758	0.351	22	5	18	2	22	22	0	4	9	25	5	11	9	16	1	5	6	8	1	3
2020-07-23	guangzhou	87	103	-16	lose	23	49	26	0.469	9	27	18	0.333	14	20	6	0.7	5	9	4	0.556	25	65	40	0.385	9	31	0.646	0.22	16	4	15	1	28	21	3	5	6	23	1	3	5	8	1	2	4	9	3	3
2020-07-23	guangsha	119	96	23	win	27	42	15	0.643	15	33	18	0.455	20	25	5	0.8	3	7	4	0.429	34	63	29	0.54	8	24	0.649	0.242	28	9	12	5	22	22	7	9	11	23	0	1	3	7	3	4	4	10	0	1
2020-07-23	guangdong	131	106	25	win	31	65	34	0.477	20	29	9	0.69	9	15	6	0.6	14	27	13	0.519	36	66	30	0.545	17	34	0.872	0.405	34	8	20	3	25	21	14	20	17	27	2	6	3	11	1	2	3	5	0	1
2020-07-24	zhejiang	102	88	14	win	23	42	19	0.548	15	33	18	0.455	11	21	10	0.524	4	11	7	0.364	31	61	30	0.508	8	27	0.711	0.222	24	11	12	1	22	23	10	12	6	13	4	6	4	10	1	5	0	0	0	1
2020-07-24	sichuan	81	105	-24	lose	19	43	24	0.442	10	27	17	0.37	13	23	10	0.565	1	6	5	0.167	25	61	36	0.41	9	29	0.58	0.22	17	7	20	2	28	21	2	4	6	21	2	10	6	13	1	3	0	1	1	1
2020-07-24	shenzhen	91	106	-15	lose	23	46	23	0.5	12	34	22	0.353	9	12	3	0.75	7	18	11	0.389	26	60	34	0.433	5	24	0.632	0.119	20	5	13	0	21	18	8	11	4	10	2	5	7	15	3	8	2	8	1	9
2020-07-24	shanxi	77	114	-37	lose	24	53	29	0.453	6	18	12	0.333	11	18	7	0.611	4	13	9	0.308	26	58	32	0.448	7	19	0.594	0.194	14	4	21	4	19	23	3	7	5	10	1	2	9	15	3	4	8	17	2	5
2020-07-24	shanghai	120	127	-7	lose	37	67	30	0.552	9	32	23	0.281	19	26	7	0.731	2	10	8	0.2	42	87	45	0.483	20	30	0.714	0.392	20	10	17	2	29	27	11	19	6	25	2	7	9	22	1	4	3	4	0	3
2020-07-24	shandong	88	102	-14	lose	27	56	29	0.482	8	21	13	0.381	10	16	6	0.625	2	4	2	0.5	31	71	40	0.437	11	28	0.778	0.289	20	6	19	4	23	22	3	6	4	9	3	7	4	10	1	6	1	5	0	0
2020-07-24	qingdao	105	81	24	win	24	61	37	0.393	10	27	17	0.37	27	38	11	0.711	2	5	3	0.4	30	81	51	0.37	21	32	0.78	0.42	20	11	12	1	21	28	5	8	7	21	2	9	1	14	1	5	0	6	0	2
2020-07-24	ningbo	106	91	15	win	25	52	27	0.481	11	29	18	0.379	23	28	5	0.821	7	16	9	0.438	29	65	36	0.446	14	37	0.881	0.368	22	7	11	4	18	21	5	10	10	29	1	4	6	11	2	3	6	14	0	0
2020-07-24	liaoning	114	77	37	win	29	51	22	0.569	12	23	11	0.522	20	23	3	0.87	6	10	4	0.6	32	61	29	0.525	13	29	0.806	0.406	20	13	20	2	23	19	6	8	9	18	3	7	9	16	0	0	2	6	4	5
2020-07-24	fujian	127	120	7	win	36	66	30	0.545	9	22	13	0.409	28	35	7	0.8	3	7	4	0.429	40	79	39	0.506	12	31	0.608	0.286	20	5	15	7	27	29	14	30	5	11	7	10	9	18	0	1	1	2	0	4
2020-07-24	beikong	86	102	-16	lose	26	56	30	0.464	3	16	13	0.188	25	27	2	0.926	5	15	10	0.333	20	53	33	0.377	12	31	0.816	0.308	7	7	22	2	25	26	4	7	2	12	2	6	11	22	1	3	1	5	4	5
2020-07-24	beijing	102	86	16	win	25	40	15	0.625	11	35	24	0.314	19	26	7	0.731	8	24	16	0.333	24	47	23	0.511	7	27	0.692	0.184	26	13	14	1	26	24	3	4	10	33	3	5	10	19	2	4	0	1	2	5
2020-07-25	xinjiang	105	93	12	win	31	51	20	0.608	10	29	19	0.345	13	26	13	0.5	1	2	1	0.5	36	74	38	0.486	18	27	0.818	0.474	31	9	19	9	26	24	5	6	11	26	4	7	4	5	2	6	1	3	1	2
2020-07-25	tianjin	93	105	-12	lose	22	43	21	0.512	10	25	15	0.4	19	22	3	0.864	2	3	1	0.667	28	63	35	0.444	6	20	0.526	0.182	19	6	19	1	24	26	2	3	7	18	8	12	8	16	2	4	3	4	2	3
2020-07-26	sichuan	79	126	-47	lose	20	41	21	0.488	9	33	24	0.273	12	28	16	0.429	4	8	4	0.5	24	65	41	0.369	9	30	0.75	0.209	17	8	23	3	34	22	7	9	6	19	5	6	8	17	2	7	0	4	0	2
2020-07-26	shanghai	98	89	9	win	28	51	23	0.549	9	26	17	0.346	15	18	3	0.833	6	11	5	0.545	29	64	35	0.453	14	25	0.714	0.389	21	8	17	2	8	20	5	9	9	22	3	9	10	22	2	4	1	4	3	3
2020-07-26	shandong	89	98	-9	lose	30	55	25	0.545	7	24	17	0.292	8	8	0	1	3	9	6	0.333	32	68	36	0.471	10	22	0.611	0.286	21	8	16	3	20	8	5	8	2	9	3	7	7	18	1	1	5	10	2	5
2020-07-26	ningbo	93	106	-13	lose	26	54	28	0.481	6	15	9	0.4	23	31	8	0.742	0	3	3	0	28	62	34	0.452	8	26	0.634	0.211	21	10	23	3	28	28	6	10	5	16	1	7	6	18	3	5	4	10	1	4
2020-07-26	nanjing	122	123	-1	lose	35	63	28	0.556	12	30	18	0.4	16	20	4	0.8	4	6	2	0.667	39	83	44	0.47	11	33	0.688	0.256	27	8	16	2	21	20	7	12	10	20	3	6	13	28	2	4	3	4	1	4
2020-07-26	liaoning	126	79	47	win	29	39	10	0.744	11	40	29	0.275	35	44	9	0.795	3	6	3	0.5	32	68	36	0.471	10	34	0.791	0.25	23	11	12	1	22	34	8	13	8	23	4	6	10	15	3	4	0	1	1	4
2020-07-26	guangdong	101	82	19	win	29	55	26	0.527	8	22	14	0.364	19	22	3	0.864	5	12	7	0.417	28	61	33	0.459	9	35	0.921	0.25	19	13	20	3	26	20	8	14	4	14	2	4	8	16	2	4	4	7	1	3
2020-07-26	fujian	123	122	1	win	31	64	33	0.484	16	30	14	0.533	13	21	8	0.619	0	3	3	0	44	88	44	0.5	15	32	0.744	0.313	34	7	17	4	20	21	10	14	11	20	8	22	9	28	3	3	0	0	2	4
2020-07-26	beikong	106	93	13	win	28	61	33	0.459	8	18	10	0.444	26	30	4	0.867	3	5	2	0.6	29	70	41	0.414	15	30	0.789	0.366	20	11	22	5	28	28	10	15	4	14	1	10	8	25	6	9	0	4	0	1
2020-07-26	beijing	82	101	-19	lose	18	41	23	0.439	9	24	15	0.375	19	31	12	0.613	8	16	8	0.5	18	48	30	0.375	3	27	0.75	0.079	18	10	17	5	20	26	1	4	9	21	3	9	6	17	1	3	0	2	1	2
2020-07-27	zhejiang	96	107	-11	lose	26	57	31	0.456	9	28	19	0.321	17	27	10	0.63	4	11	7	0.364	26	69	43	0.377	14	25	0.833	0.28	22	6	16	4	26	21	3	5	9	27	4	12	8	24	2	6	2	3	3	11
2020-07-27	xinjiang	110	70	40	win	36	59	23	0.61	9	23	14	0.391	11	21	10	0.524	0	6	6	0	44	75	31	0.587	14	47	0.855	0.4	32	5	18	1	17	18	10	13	5	19	3	6	10	16	5	6	3	8	2	4
2020-07-27	shenzhen	107	96	11	win	32	54	22	0.593	6	16	10	0.375	25	31	6	0.806	5	6	1	0.833	30	61	31	0.492	5	36	0.72	0.167	20	4	14	6	21	26	10	17	3	8	3	3	8	15	2	5	4	6	4	11
2020-07-27	shanxi	107	100	7	win	32	48	16	0.667	7	20	13	0.35	22	29	7	0.759	3	6	3	0.5	34	60	26	0.567	8	31	0.738	0.32	24	5	17	3	22	29	4	6	6	16	4	7	9	17	2	6	0	0	1	2
2020-07-27	qingdao	99	80	19	win	30	59	29	0.508	8	25	17	0.32	15	16	1	0.938	5	6	1	0.833	31	76	45	0.408	12	34	0.81	0.293	22	10	13	6	21	20	3	4	8	17	9	16	12	23	1	2	0	5	0	3
2020-07-27	jilin	80	99	-19	lose	22	49	27	0.449	8	24	16	0.333	12	18	6	0.667	4	9	5	0.444	24	62	38	0.387	8	29	0.707	0.19	20	6	15	3	20	21	6	8	8	21	3	16	1	12	3	5	0	2	0	1
2020-07-27	jiangsu	70	110	-40	lose	16	47	31	0.34	11	37	26	0.297	5	11	6	0.455	2	5	3	0.4	24	78	54	0.308	8	21	0.6	0.145	17	10	13	2	18	17	3	10	7	21	1	9	7	21	3	8	0	1	2	6
2020-07-27	guangsha	100	107	-7	lose	36	60	24	0.6	5	23	18	0.217	13	17	4	0.765	1	6	5	0.167	39	76	37	0.513	11	17	0.68	0.262	24	9	11	2	29	22	6	10	2	10	0	1	9	20	1	4	1	3	3	8
2021-10-16	sichuan	93	100	-7	lose	33	57	24	0.579	4	21	17	0.19	15	19	4	0.789	1	4	3	0.25	34	72	38	0.472	8	30	0.612	0.211	21	7	12	0	18	20	7	8	4	14	2	7	10	19	1	3	1	6	2	5
2021-10-16	shenzhen	83	106	-23	lose	14	41	27	0.341	10	29	19	0.345	25	30	5	0.833	3	12	9	0.25	20	57	37	0.351	9	32	0.711	0.225	18	5	22	4	23	25	2	9	5	10	5	13	6	16	2	6	0	2	2	5
2021-10-16	shandong	105	93	12	win	34	52	18	0.654	9	27	18	0.333	10	13	3	0.769	3	8	5	0.375	38	69	31	0.551	12	22	0.647	0.387	15	12	18	3	16	14	9	14	5	20	4	11	5	9	2	2	3	4	1	2
2021-10-16	qingdao	100	93	7	win	28	57	29	0.491	10	33	23	0.303	14	16	2	0.875	7	17	10	0.412	29	71	42	0.408	19	30	0.789	0.388	18	6	11	4	20	18	3	13	9	17	7	9	8	11	1	7	2	5	1	4
2021-10-16	nanjing	79	91	-12	lose	21	50	29	0.42	7	34	27	0.206	16	23	7	0.696	4	19	15	0.211	23	64	41	0.359	13	30	0.652	0.255	22	9	9	4	17	14	11	19	3	17	3	8	4	8	2	4	0	4	0	1
2021-10-16	jilin	91	79	12	win	25	51	26	0.49	7	30	23	0.233	20	23	3	0.87	3	15	12	0.2	26	63	37	0.413	16	38	0.745	0.348	24	6	17	2	14	17	5	11	5	17	2	10	4	10	1	6	2	2	1	2
2021-10-16	guangdong	106	83	23	win	30	60	30	0.5	11	29	18	0.379	13	18	5	0.722	4	12	8	0.333	35	75	40	0.467	13	31	0.775	0.289	30	9	15	5	25	23	10	17	6	20	0	5	3	11	3	7	1	4	2	2
2021-10-16	beikong	93	105	-12	lose	32	57	25	0.561	7	17	10	0.412	8	14	6	0.571	4	7	3	0.571	35	67	32	0.522	12	19	0.613	0.353	13	10	19	7	14	16	12	14	3	7	3	3	5	12	3	7	1	5	1	3
2020-10-17	zhejiang	138	113	25	win	22	40	18	0.55	17	30	13	0.567	43	52	9	0.827	13	23	10	0.565	24	45	21	0.533	9	32	0.711	0.3	21	6	22	3	29	37	8	11	6	11	5	8	9	18	1	2	0	0	1	4
2020-10-17	qingdao	102	94	8	win	25	50	25	0.5	8	22	14	0.364	28	33	5	0.848	5	16	11	0.313	25	53	28	0.472	9	27	0.794	0.265	16	10	20	2	26	34	6	9	6	13	1	6	7	21	2	5	1	1	2	5
2020-10-17	jiangsu	94	102	-8	lose	27	48	21	0.563	8	27	19	0.296	16	17	1	0.941	5	19	14	0.263	29	55	26	0.527	7	25	0.735	0.206	20	7	22	2	34	26	7	12	8	13	3	5	11	21	0	4	1	4	3	6
2020-10-17	guangdong	113	138	-25	lose	35	64	29	0.547	7	26	19	0.269	22	31	9	0.71	8	25	17	0.32	32	63	31	0.508	13	21	0.7	0.289	19	9	17	4	37	29	8	15	2	14	3	12	17	29	3	6	1	3	4	6
2021-10-17	zhejiang	108	85	23	win	31	53	22	0.585	11	31	20	0.355	13	22	9	0.591	7	14	7	0.5	31	66	35	0.47	14	30	0.75	0.35	31	12	15	2	15	22	8	16	9	18	1	4	4	7	3	5	2	3	0	1
2021-10-17	xinjiang	69	108	-39	lose	22	64	42	0.344	4	22	18	0.182	13	23	10	0.565	2	10	8	0.2	23	75	52	0.307	15	20	0.541	0.263	7	7	8	4	17	22	9	19	1	8	5	9	6	15	0	3	0	1	2	5
2021-10-17	tianjin	94	120	-26	lose	17	44	27	0.386	11	34	23	0.324	27	34	7	0.794	4	7	3	0.571	22	69	47	0.319	8	35	0.745	0.186	13	10	23	8	24	26	8	14	6	17	2	5	3	13	0	1	0	4	1	6
2021-10-17	shanxi	105	92	13	win	34	63	29	0.54	6	18	12	0.333	19	22	3	0.864	3	8	5	0.375	35	71	36	0.493	16	27	0.73	0.457	29	13	19	1	14	22	5	7	2	10	4	9	6	17	0	1	4	9	3	6
2021-10-17	shanghai	120	94	26	win	34	63	29	0.54	13	37	24	0.351	13	18	5	0.722	4	7	3	0.571	37	87	50	0.425	12	35	0.814	0.255	28	14	14	8	26	24	7	18	12	27	4	11	4	9	0	7	4	7	1	4
2021-10-17	ningbo	92	105	-13	lose	24	49	25	0.49	13	31	18	0.419	5	10	5	0.5	7	10	3	0.7	30	70	40	0.429	10	19	0.543	0.27	25	10	19	1	22	14	7	10	7	19	6	11	5	14	4	6	1	2	0	5
2021-10-17	liaoning	107	89	18	win	25	57	32	0.439	12	26	14	0.462	21	29	8	0.724	3	7	4	0.429	29	71	42	0.408	14	33	0.868	0.333	24	7	15	2	22	26	3	8	11	21	2	8	4	6	1	2	1	5	3	6
2021-10-17	jiangsu	71	87	-16	lose	22	46	24	0.478	7	23	16	0.304	6	9	3	0.667	1	10	9	0.1	27	58	31	0.466	4	23	0.622	0.125	11	10	19	0	25	16	4	6	4	13	1	4	8	13	0	4	3	6	2	5
2021-10-17	guangzhou	89	107	-18	lose	22	45	23	0.489	11	31	20	0.355	12	17	5	0.706	2	6	4	0.333	31	70	39	0.443	5	28	0.667	0.132	19	8	11	2	26	22	4	12	9	19	1	7	1	1	1	3	4	9	2	4
2021-10-17	guangsha	108	69	39	win	35	65	30	0.538	8	22	14	0.364	14	18	4	0.778	0	3	3	0	41	82	41	0.5	17	42	0.737	0.459	14	6	14	5	22	17	9	11	4	12	1	3	7	15	1	3	5	7	2	2
2021-10-17	fujian	85	108	-23	lose	20	50	30	0.4	13	27	14	0.481	6	8	2	0.75	10	16	6	0.625	22	60	38	0.367	10	26	0.65	0.25	22	7	21	4	22	15	6	10	9	18	3	7	3	11	1	5	0	2	2	7
2021-10-17	beijing	87	71	16	win	21	41	20	0.512	8	22	14	0.364	21	28	7	0.75	0	1	1	0	27	60	33	0.45	14	28	0.875	0.378	23	8	18	3	16	25	3	4	10	22	6	13	4	6	0	0	2	3	0	3
2020-10-18	xinjiang	102	97	5	win	32	62	30	0.516	8	19	11	0.421	14	24	10	0.583	2	6	4	0.333	34	71	37	0.479	8	28	0.824	0.19	21	10	15	2	29	24	6	12	3	7	4	7	4	20	3	5	7	7	0	1
2020-10-18	sichuan	83	93	-10	lose	18	56	38	0.321	7	20	13	0.35	26	33	7	0.788	2	11	9	0.182	23	65	42	0.354	10	28	0.757	0.227	19	11	18	5	27	28	8	14	3	9	2	8	4	15	0	6	1	11	0	1
2020-10-18	shenzhen	93	83	10	win	19	44	25	0.432	9	27	18	0.333	28	36	8	0.778	3	10	7	0.3	23	59	36	0.39	9	34	0.773	0.243	12	10	20	6	28	27	3	4	3	16	3	10	8	23	2	4	1	3	1	4
2020-10-18	shanxi	99	92	7	win	35	53	18	0.66	6	27	21	0.222	11	20	9	0.55	2	6	4	0.333	35	70	35	0.5	10	25	0.595	0.256	27	11	12	1	24	21	5	5	1	9	0	3	8	13	6	13	6	13	2	4
2020-10-18	shanghai	94	122	-28	lose	22	47	25	0.468	9	36	27	0.25	23	34	11	0.676	9	33	24	0.273	19	47	28	0.404	21	22	0.71	0.404	17	11	26	2	30	26	4	11	6	21	2	8	8	18	1	2	1	3	1	2
2020-10-18	nanjing	97	105	-8	lose	30	52	22	0.577	9	24	15	0.375	10	13	3	0.769	7	22	15	0.318	31	53	22	0.585	4	33	0.786	0.148	25	5	20	1	28	18	14	23	2	9	6	10	6	11	2	6	3	7	2	2
2020-10-18	jilin	105	97	8	win	26	45	19	0.578	8	29	21	0.276	29	38	9	0.763	10	27	17	0.37	22	45	23	0.489	9	23	0.852	0.214	19	8	13	5	18	28	3	5	5	17	3	8	8	11	2	6	5	11	3	6
2020-10-18	guangzhou	97	102	-5	lose	25	44	19	0.568	10	30	20	0.333	17	21	4	0.81	2	9	7	0.222	33	65	32	0.508	6	34	0.81	0.176	18	10	22	7	24	29	2	8	4	13	3	3	5	13	4	7	0	4	1	2
2020-10-18	guangsha	122	94	28	win	37	54	17	0.685	9	26	17	0.346	21	28	7	0.75	8	16	8	0.5	33	59	26	0.559	9	31	0.596	0.29	21	13	21	2	26	30	11	14	6	11	1	4	15	24	3	5	1	3	3	5
2020-10-18	fujian	92	99	-7	lose	22	49	27	0.449	10	30	20	0.333	18	24	6	0.75	3	8	5	0.375	27	69	42	0.391	17	29	0.744	0.405	16	6	21	0	21	24	4	6	5	15	7	14	9	18	0	7	0	2	1	3
2021-10-18	qingdao	90	103	-13	lose	24	59	35	0.407	10	27	17	0.37	12	14	2	0.857	7	12	5	0.583	27	74	47	0.365	13	21	0.6	0.295	22	12	11	5	20	19	9	14	5	13	7	16	3	13	0	1	2	4	1	5
2021-10-18	jilin	73	93	-20	lose	13	39	26	0.333	11	36	25	0.306	14	20	6	0.7	5	12	7	0.417	17	61	44	0.279	8	24	0.686	0.157	15	11	15	4	8	18	3	7	7	23	1	7	3	15	0	5	0	0	0	3
2021-10-18	guangdong	103	90	13	win	20	47	27	0.426	17	33	16	0.515	12	14	2	0.857	11	20	9	0.55	26	60	34	0.433	14	31	0.705	0.4	26	7	18	5	19	20	10	16	10	19	1	6	3	12	2	5	1	3	0	2
2021-10-18	beikong	93	73	20	win	29	55	26	0.527	10	23	13	0.435	5	8	3	0.625	5	14	9	0.357	32	62	30	0.516	11	43	0.843	0.314	28	5	20	10	18	8	8	13	4	10	4	12	8	14	3	3	4	5	1	2
2020-10-19	tianjin	108	121	-13	lose	21	46	25	0.457	17	39	22	0.436	15	17	2	0.882	6	16	10	0.375	31	68	37	0.456	8	22	0.611	0.182	24	11	15	1	22	25	10	16	12	24	4	8	3	12	0	7	2	2	0	2
2020-10-19	shandong	99	83	16	win	34	67	33	0.507	5	18	13	0.278	16	25	9	0.64	3	4	1	0.75	35	80	45	0.438	19	34	0.829	0.442	15	6	13	5	19	16	11	15	3	8	3	10	12	26	3	5	3	8	2	6
2020-10-19	liaoning	121	108	13	win	35	57	22	0.614	10	25	15	0.4	21	28	7	0.75	2	7	5	0.286	42	74	32	0.568	14	36	0.818	0.389	20	10	17	1	25	22	9	11	10	22	1	6	8	12	1	3	2	9	0	0
2020-10-19	beikong	83	99	-16	lose	22	51	29	0.431	9	27	18	0.333	12	16	4	0.75	3	8	5	0.375	25	67	42	0.373	7	24	0.558	0.171	13	7	13	6	16	19	2	7	2	12	3	12	4	14	6	9	5	8	1	2
2021-10-19	zhejiang	96	73	23	win	25	49	24	0.51	11	23	12	0.478	13	15	2	0.867	6	9	3	0.667	27	60	33	0.45	12	30	0.789	0.375	21	7	19	3	25	22	7	8	5	12	4	8	6	12	1	2	3	6	0	3
2021-10-19	xinjiang	109	79	30	win	36	55	19	0.655	7	24	17	0.292	16	22	6	0.727	5	13	8	0.385	36	64	28	0.563	13	27	0.659	0.419	26	14	17	11	17	21	13	16	6	16	4	7	8	14	4	10	4	8	1	3
2021-10-19	tianjin	94	122	-28	lose	17	42	25	0.405	11	28	17	0.393	27	31	4	0.871	6	18	12	0.333	21	51	30	0.412	9	20	0.606	0.22	15	7	20	4	21	31	4	6	9	21	3	8	7	14	1	5	1	6	3	5
2021-10-19	shenzhen	122	94	28	win	26	47	21	0.553	19	39	20	0.487	13	17	4	0.765	9	18	9	0.5	34	66	32	0.515	13	32	0.78	0.394	37	12	18	7	31	21	8	10	17	33	6	16	2	6	0	1	1	7	0	0
2021-10-19	shanxi	97	99	-2	lose	26	52	26	0.5	11	37	26	0.297	12	17	5	0.706	4	19	15	0.211	31	68	37	0.456	11	32	0.821	0.224	23	5	10	2	18	19	6	14	5	15	5	10	6	14	1	1	2	3	3	7
2021-10-19	shandong	87	98	-11	lose	27	50	23	0.54	7	27	20	0.259	12	17	5	0.706	1	8	7	0.125	32	68	36	0.471	10	26	0.565	0.233	16	5	8	7	19	16	2	6	5	14	3	9	11	20	1	4	2	7	2	6
2021-10-19	ningbo	79	109	-30	lose	22	54	32	0.407	9	29	20	0.31	8	13	5	0.615	4	14	10	0.286	26	68	42	0.382	14	18	0.581	0.341	24	10	21	2	21	17	6	10	6	28	4	9	6	15	1	4	0	2	0	1
2021-10-19	liaoning	98	87	11	win	28	61	33	0.459	9	24	15	0.375	15	18	3	0.833	4	10	6	0.4	29	71	42	0.408	20	33	0.767	0.435	22	5	11	2	16	19	8	12	4	9	4	8	4	10	2	6	2	6	0	0
2021-10-19	jiangsu	88	97	-9	lose	25	44	19	0.568	8	27	19	0.296	14	19	5	0.737	7	19	12	0.368	25	51	26	0.49	5	22	0.611	0.147	27	11	15	2	21	21	8	14	3	13	1	3	3	9	1	2	0	4	0	0
2021-10-19	guangzhou	99	97	2	win	32	59	27	0.542	8	26	18	0.308	11	14	3	0.786	5	15	10	0.333	33	68	35	0.485	7	38	0.776	0.179	25	4	10	5	19	18	3	10	3	8	5	8	8	14	3	7	4	8	4	4
2021-10-19	fujian	97	88	9	win	21	45	24	0.467	16	37	21	0.432	7	11	4	0.636	6	16	10	0.375	30	65	35	0.462	14	29	0.853	0.389	25	10	17	2	21	21	8	12	10	25	5	11	5	13	2	4	0	0	1	4
2021-10-19	beijing	73	96	-23	lose	29	59	30	0.492	0	7	7	0	15	28	13	0.536	0	2	2	0	27	62	35	0.435	8	20	0.625	0.211	16	8	16	7	22	25	5	9	3	8	2	7	7	16	0	3	3	6	0	1
2020-10-20	zhejiang	92	75	17	win	27	58	31	0.466	5	23	18	0.217	23	28	5	0.821	3	8	5	0.375	27	71	44	0.38	17	34	0.773	0.378	16	8	11	4	25	27	7	13	5	16	1	5	9	21	2	4	0	1	0	2
2020-10-20	sichuan	89	79	10	win	26	43	17	0.605	8	27	19	0.296	13	18	5	0.722	5	14	9	0.357	27	54	27	0.5	11	23	0.622	0.306	26	10	16	3	21	17	5	8	6	20	2	6	1	5	3	4	4	7	0	2
2020-10-20	shenzhen	126	134	-8	lose	21	37	16	0.568	11	22	11	0.5	51	64	13	0.797	11	20	9	0.55	16	34	18	0.471	8	31	0.705	0.25	24	5	26	6	33	48	8	14	6	12	4	7	9	17	1	1	0	0	3	5
2020-10-20	shanxi	88	95	-7	lose	27	61	34	0.443	7	27	20	0.259	13	18	5	0.722	5	16	11	0.313	29	72	43	0.403	10	30	0.732	0.217	18	12	15	4	26	15	5	9	3	13	3	4	9	25	4	16	1	4	0	1
2020-10-20	shanghai	95	88	7	win	27	51	24	0.529	7	28	21	0.25	20	26	6	0.769	4	16	12	0.25	26	59	33	0.441	11	36	0.783	0.268	15	10	20	5	15	26	8	11	2	13	5	11	14	26	1	4	1	2	4	8
2020-10-20	qingdao	112	88	24	win	23	46	23	0.5	17	33	16	0.515	15	19	4	0.789	3	5	2	0.6	36	73	37	0.493	8	24	0.667	0.32	35	8	10	3	29	21	7	12	13	20	2	10	7	22	2	4	2	2	2	3
2020-10-20	jilin	110	92	18	win	36	58	22	0.621	8	14	6	0.571	14	24	10	0.583	6	13	7	0.462	32	53	21	0.604	9	30	0.714	0.346	36	12	17	5	15	24	9	13	6	9	4	9	12	20	2	3	2	4	4	8
2020-10-20	jiangsu	92	110	-18	lose	27	54	27	0.5	10	31	21	0.323	8	8	0	1	9	19	10	0.474	25	63	38	0.397	12	17	0.654	0.286	25	8	17	3	24	15	6	11	8	12	3	7	11	25	2	5	0	0	2	4
2020-10-20	guangzhou	88	112	-24	lose	30	61	31	0.492	5	14	9	0.357	13	21	8	0.619	1	3	2	0.333	31	69	38	0.449	12	17	0.68	0.333	19	4	16	3	21	29	4	5	4	10	2	6	18	31	2	3	3	10	4	6
2020-10-20	guangdong	134	126	8	win	34	64	30	0.531	10	24	14	0.417	36	45	9	0.8	10	20	10	0.5	30	64	34	0.469	13	24	0.75	0.295	21	16	13	1	48	33	9	15	6	11	1	4	11	25	1	2	3	5	2	3
2020-10-20	fujian	79	89	-10	lose	20	45	25	0.444	8	23	15	0.348	15	20	5	0.75	3	11	8	0.273	23	55	32	0.418	14	25	0.694	0.378	13	9	18	2	17	21	6	14	4	12	4	10	9	19	2	6	4	7	0	1
2020-10-20	beijing	75	92	-17	lose	20	47	27	0.426	6	22	16	0.273	17	27	10	0.63	2	9	7	0.222	22	58	36	0.379	10	28	0.622	0.227	15	6	14	3	27	25	4	10	4	15	0	1	4	10	2	7	4	7	0	2
2021-10-20	sichuan	84	118	-34	lose	21	47	26	0.447	8	20	12	0.4	18	27	9	0.667	4	8	4	0.5	24	58	34	0.414	8	30	0.769	0.216	15	8	32	6	21	24	7	12	3	9	1	3	5	12	3	7	3	7	2	4
2021-10-20	shanghai	118	84	34	win	32	52	20	0.615	13	40	27	0.325	15	21	6	0.714	6	16	10	0.375	36	73	37	0.493	9	29	0.784	0.231	26	19	14	3	24	21	14	19	8	17	2	9	4	8	3	5	2	4	2	7
2021-10-20	nanjing	90	108	-18	lose	24	52	28	0.462	11	27	16	0.407	9	15	6	0.6	8	13	5	0.615	25	64	39	0.391	8	24	0.649	0.211	20	9	18	3	25	24	6	9	6	16	3	8	8	14	2	4	1	5	1	5
2021-10-20	guangsha	108	90	18	win	25	51	26	0.49	13	26	13	0.5	19	25	6	0.76	4	6	2	0.667	32	69	37	0.464	13	30	0.789	0.351	21	12	18	7	24	25	11	15	3	10	1	3	3	7	2	6	1	4	3	6
2018-10-21	xinjiang	101	93	8	win	26	54	28	0.481	12	32	20	0.375	13	14	1	0.929	4	9	5	0.444	32	75	43	0.427	14	33	0.75	0.304	19	11	14	4	23	22	10	18	9	26	2	7	7	11	1	2	3	6	3	3
2018-10-21	jiangsu	93	101	-8	lose	25	54	29	0.463	11	27	16	0.407	10	17	7	0.588	1	3	2	0.333	32	75	43	0.427	11	32	0.696	0.25	20	8	17	2	22	23	7	11	7	21	2	6	3	10	1	3	4	12	0	0
2018-10-21	guangdong	87	84	3	win	15	42	27	0.357	11	27	16	0.407	24	34	10	0.706	4	16	12	0.25	22	53	31	0.415	18	33	0.805	0.409	15	8	20	3	21	27	4	9	8	20	2	4	5	17	0	1	2	4	2	9
2018-10-21	beijing	84	87	-3	lose	20	48	28	0.417	11	29	18	0.379	11	16	5	0.688	7	17	10	0.412	21	57	36	0.368	8	26	0.591	0.195	17	13	15	2	27	21	7	10	7	18	0	5	6	21	0	2	3	5	4	7
2020-10-21	xinjiang	123	92	31	win	32	50	18	0.64	16	27	11	0.593	11	19	8	0.579	9	15	6	0.6	34	57	23	0.596	15	39	0.722	0.5	32	7	28	7	31	20	17	22	7	16	1	3	5	8	1	1	4	8	0	0
2020-10-21	tianjin	83	92	-9	lose	19	36	17	0.528	8	40	32	0.2	21	30	9	0.7	2	11	9	0.182	23	63	40	0.365	8	23	0.697	0.174	20	13	18	2	18	31	8	16	8	29	2	10	2	7	2	2	1	5	0	0
2020-10-21	shandong	100	110	-10	lose	31	60	29	0.517	9	21	12	0.429	11	21	10	0.524	0	0	0	0	37	78	41	0.474	10	27	0.711	0.25	15	7	14	2	19	24	2	4	4	11	3	8	18	38	2	5	2	3	6	9
2020-10-21	nanjing	92	83	9	win	21	31	10	0.677	15	44	29	0.341	5	10	5	0.5	5	10	5	0.5	31	65	34	0.477	10	38	0.826	0.303	24	11	27	2	31	18	7	11	11	32	1	4	7	11	0	0	1	2	0	2
2020-10-21	liaoning	110	100	10	win	30	48	18	0.625	11	31	20	0.355	17	25	8	0.68	4	6	2	0.667	35	71	36	0.493	11	30	0.75	0.289	34	8	14	3	24	19	6	9	8	24	0	2	8	14	4	4	1	1	3	5
2020-10-21	beikong	92	123	-31	lose	20	59	39	0.339	9	28	19	0.321	25	33	8	0.758	3	10	7	0.3	24	75	51	0.32	15	15	0.5	0.278	12	13	14	2	20	31	9	25	3	13	4	10	7	24	2	9	2	3	2	3
2021-10-21	zhejiang	94	110	-16	lose	18	47	29	0.383	10	30	20	0.333	28	33	5	0.848	3	8	5	0.375	24	68	44	0.353	13	26	0.634	0.295	15	4	20	5	24	31	5	15	7	13	2	7	4	13	1	5	1	3	1	2
2021-10-21	xinjiang	97	112	-15	lose	33	57	24	0.579	8	24	16	0.333	7	13	6	0.538	2	4	2	0.5	38	76	38	0.5	11	33	0.786	0.306	20	4	18	4	22	19	12	13	3	14	4	9	5	8	3	6	4	7	0	2
2021-10-21	tianjin	91	79	12	win	19	47	28	0.404	10	28	18	0.357	23	27	4	0.852	7	17	10	0.412	22	58	36	0.379	16	29	0.659	0.39	15	6	21	6	19	25	8	11	6	16	2	9	3	10	1	2	1	4	0	3
2021-10-21	shenzhen	107	85	22	win	23	48	25	0.479	10	27	17	0.37	31	38	7	0.816	4	8	4	0.5	28	66	38	0.424	10	32	0.865	0.263	19	14	11	3	26	32	3	10	6	21	8	12	4	9	0	0	1	1	1	5
2021-10-21	shanxi	112	97	15	win	28	52	24	0.538	12	35	23	0.343	20	26	6	0.769	3	7	4	0.429	32	75	43	0.427	9	25	0.694	0.214	21	11	7	4	19	22	7	14	5	16	7	10	11	15	2	3	1	7	3	3
2021-10-21	qingdao	79	91	-12	lose	18	45	27	0.4	8	30	22	0.267	19	22	3	0.864	5	11	6	0.455	20	63	43	0.317	15	25	0.61	0.341	19	12	16	4	25	19	6	9	4	16	7	14	4	12	1	4	0	1	0	1
2021-10-21	liaoning	103	88	15	win	32	57	25	0.561	7	30	23	0.233	18	21	3	0.857	4	12	8	0.333	33	73	40	0.452	21	29	0.829	0.488	29	9	14	3	19	17	9	13	6	23	3	7	3	6	4	7	1	3	1	2
2021-10-21	jilin	88	103	-15	lose	20	40	20	0.5	11	27	16	0.407	15	21	6	0.714	3	7	4	0.429	27	59	32	0.458	6	22	0.512	0.171	16	7	16	4	17	19	0	3	8	15	0	5	8	15	0	5	2	6	4	8
2021-10-21	jiangsu	85	107	-22	lose	18	36	18	0.5	10	33	23	0.303	19	27	8	0.704	4	5	1	0.8	23	63	40	0.365	5	28	0.737	0.135	19	5	20	1	32	25	4	6	7	20	2	8	5	13	1	4	2	4	2	4
2021-10-21	guangzhou	102	98	4	win	24	44	20	0.545	15	29	14	0.517	9	15	6	0.6	3	6	3	0.5	32	63	31	0.508	9	23	0.59	0.25	15	6	17	3	27	18	5	10	11	16	5	9	0	0	0	1	2	2	4	5
2021-10-21	guangdong	110	94	16	win	30	57	27	0.526	11	28	17	0.393	17	24	7	0.708	4	12	8	0.333	36	72	36	0.5	15	31	0.705	0.366	28	13	13	9	31	24	10	19	7	14	1	7	4	12	2	7	1	1	1	1
2021-10-21	beikong	98	102	-4	lose	23	43	20	0.535	11	30	19	0.367	19	30	11	0.633	6	12	6	0.5	27	60	33	0.45	16	27	0.75	0.41	18	8	13	7	18	27	9	15	6	16	2	5	0	1	0	2	0	5	1	2
2020-10-22	zhejiang	105	93	12	win	25	60	35	0.417	9	26	17	0.346	28	34	6	0.824	2	6	4	0.333	30	78	48	0.385	16	25	0.833	0.381	27	10	14	9	28	31	7	12	7	16	2	6	8	24	1	1	0	1	2	9
2020-10-22	sichuan	90	102	-12	lose	24	42	18	0.571	10	30	20	0.333	12	24	12	0.5	8	27	19	0.296	19	38	19	0.5	7	24	0.667	0.167	23	7	16	3	19	21	3	4	5	14	4	9	6	14	4	9	5	10	2	2
2020-10-22	shenzhen	78	92	-14	lose	16	41	25	0.39	7	20	13	0.35	25	32	7	0.781	3	16	13	0.188	18	43	25	0.419	8	27	0.75	0.229	16	9	23	5	20	25	5	9	1	7	1	4	4	16	1	6	0	3	1	2
2020-10-22	shanxi	93	105	-12	lose	26	52	26	0.5	6	13	7	0.462	23	32	9	0.719	3	3	0	1	26	59	33	0.441	5	26	0.619	0.167	18	8	23	13	31	28	6	9	5	9	1	5	14	30	1	2	1	5	5	11
2020-10-22	shanghai	102	90	12	win	23	45	22	0.511	16	34	18	0.471	8	12	4	0.667	15	26	11	0.577	22	51	29	0.431	12	35	0.833	0.333	20	9	18	1	21	19	4	6	7	21	1	4	9	21	3	4	4	6	1	4
2020-10-22	jiangsu	73	92	-19	lose	17	46	29	0.37	6	29	23	0.207	21	32	11	0.656	4	18	14	0.222	19	57	38	0.333	9	22	0.611	0.184	15	15	17	2	35	29	8	21	5	15	1	6	2	12	0	5	1	3	0	0
2020-10-22	guangzhou	92	73	19	win	21	42	21	0.5	7	24	17	0.292	29	41	12	0.707	10	21	11	0.476	16	43	27	0.372	14	40	0.816	0.389	17	5	25	10	29	35	5	10	6	16	2	3	7	16	0	2	1	5	0	1
2020-10-22	beijing	92	78	14	win	23	44	21	0.523	10	24	14	0.417	16	25	9	0.64	9	20	11	0.45	22	46	24	0.478	9	27	0.771	0.25	25	13	17	3	25	20	7	9	6	16	1	3	5	15	0	0	0	3	1	2
2021-10-22	sichuan	101	80	21	win	29	58	29	0.5	7	22	15	0.318	22	26	4	0.846	5	11	6	0.455	27	65	38	0.415	16	43	0.782	0.41	23	9	19	2	17	24	8	17	4	11	5	12	6	14	1	5	5	6	2	4
2021-10-22	shanghai	103	109	-6	lose	32	53	21	0.604	4	27	23	0.148	27	33	6	0.818	0	4	4	0	30	70	40	0.429	14	28	0.848	0.368	19	4	16	7	20	26	11	20	4	16	4	7	7	9	1	2	5	6	0	4
2021-10-22	shandong	92	112	-20	lose	35	66	31	0.53	3	16	13	0.188	13	16	3	0.813	0	5	5	0	36	75	39	0.48	12	13	0.52	0.324	13	14	13	3	19	19	5	10	2	10	3	8	15	23	2	3	4	6	2	5
2021-10-22	ningbo	73	97	-24	lose	18	47	29	0.383	4	20	16	0.2	25	29	4	0.862	3	5	2	0.6	14	57	43	0.246	4	23	0.639	0.103	23	11	16	3	26	25	7	13	4	15	1	7	4	12	1	3	1	5	1	2
2021-10-22	nanjing	97	73	24	win	22	48	26	0.458	12	30	18	0.4	17	26	9	0.654	1	3	2	0.333	33	75	42	0.44	13	35	0.897	0.361	28	10	16	9	25	26	6	9	8	18	3	12	6	12	1	5	2	7	0	2
2021-10-22	guangsha	112	92	20	win	29	51	22	0.569	13	24	11	0.542	15	16	1	0.938	8	12	4	0.667	32	61	29	0.525	12	25	0.676	0.48	21	8	19	5	19	19	6	8	6	15	3	7	9	14	3	4	3	6	2	2
2021-10-22	fujian	80	101	-21	lose	21	48	27	0.438	8	34	26	0.235	14	20	6	0.7	4	15	11	0.267	25	67	42	0.373	12	23	0.59	0.218	14	8	13	6	24	17	4	10	3	15	2	6	6	14	1	5	3	7	1	2
2021-10-22	beijing	109	103	6	win	31	60	29	0.517	10	18	8	0.556	17	23	6	0.739	3	5	2	0.6	33	68	35	0.485	5	24	0.632	0.152	23	8	12	6	26	20	5	5	8	13	1	3	12	22	3	3	3	8	3	6
2020-10-23	xinjiang	97	108	-11	lose	30	56	26	0.536	9	24	15	0.375	10	13	3	0.769	3	5	2	0.6	33	72	39	0.458	10	29	0.829	0.256	24	4	17	5	22	13	9	14	6	15	1	2	3	12	2	6	9	13	0	0
2020-10-23	tianjin	96	104	-8	lose	27	53	26	0.509	10	32	22	0.313	12	14	2	0.857	7	16	9	0.438	28	67	39	0.418	12	30	0.698	0.286	22	9	21	2	20	25	7	12	7	28	4	7	13	21	1	5	1	3	1	2
2020-10-23	shandong	87	69	18	win	21	51	30	0.412	7	21	14	0.333	24	28	4	0.857	3	11	8	0.273	21	57	36	0.368	13	28	0.683	0.325	20	11	18	2	16	27	5	7	6	13	1	9	6	19	2	4	2	6	3	8
2020-10-23	qingdao	104	96	8	win	33	56	23	0.589	9	32	23	0.281	11	13	2	0.846	5	8	3	0.625	35	78	43	0.449	13	30	0.714	0.302	24	11	17	4	25	20	14	18	7	21	3	9	12	26	0	1	0	0	4	9
2020-10-23	nanjing	69	87	-18	lose	14	38	24	0.368	11	33	22	0.333	8	14	6	0.571	3	10	7	0.3	21	60	39	0.35	13	27	0.675	0.317	19	6	24	1	27	15	2	5	7	19	0	5	2	7	1	2	2	6	1	8
2020-10-23	liaoning	111	91	20	win	19	37	18	0.514	19	43	24	0.442	16	20	4	0.8	1	4	3	0.25	34	73	39	0.466	13	33	0.805	0.382	27	4	18	6	20	18	2	4	15	27	5	10	6	11	2	3	2	8	1	2
2020-10-23	jilin	108	97	11	win	34	59	25	0.576	6	18	12	0.333	22	25	3	0.88	5	15	10	0.333	35	62	27	0.565	6	29	0.744	0.171	29	9	9	6	13	22	8	14	3	13	4	9	7	16	7	7	2	6	0	2
2020-10-23	guangsha	106	115	-9	lose	24	47	23	0.511	9	28	19	0.321	31	38	7	0.816	3	6	3	0.5	25	64	39	0.391	6	19	0.613	0.15	17	9	11	6	17	32	5	8	8	16	4	11	8	22	2	8	2	5	2	8
2020-10-23	guangdong	115	106	9	win	25	46	21	0.543	19	39	20	0.487	8	12	4	0.667	8	13	5	0.615	34	70	36	0.486	12	34	0.85	0.387	31	5	19	3	32	17	8	16	14	27	4	8	6	14	2	4	0	1	1	4
2020-10-23	beikong	91	111	-20	lose	28	61	33	0.459	7	20	13	0.35	14	17	3	0.824	1	4	3	0.25	29	72	43	0.403	8	21	0.618	0.195	20	7	12	4	18	20	3	5	5	16	3	6	10	27	8	15	4	8	2	7
2021-10-23	zhejiang	105	98	7	win	25	51	26	0.49	8	28	20	0.286	31	36	5	0.861	1	7	6	0.143	28	68	40	0.412	11	38	0.76	0.25	15	6	13	3	29	28	8	12	3	12	4	5	5	10	1	5	1	3	0	2
2021-10-23	tianjin	90	96	-6	lose	17	34	17	0.5	12	39	27	0.308	20	24	4	0.833	4	9	5	0.444	25	64	39	0.391	9	33	0.805	0.225	18	6	11	6	24	27	6	10	8	21	4	11	4	10	1	3	2	4	0	0
2021-10-23	shanxi	107	99	8	win	25	58	33	0.431	15	31	16	0.484	12	16	4	0.75	6	12	6	0.5	32	75	43	0.427	13	37	0.841	0.271	25	8	11	2	21	19	8	11	9	18	2	9	2	9	0	4	0	3	1	3
2021-10-23	qingdao	98	105	-7	lose	23	57	34	0.404	10	23	13	0.435	22	31	9	0.71	1	5	4	0.2	25	68	43	0.368	12	33	0.75	0.24	21	10	14	8	28	29	6	13	3	8	2	8	6	12	2	4	2	8	0	3
2021-10-23	liaoning	99	107	-8	lose	24	49	25	0.49	11	36	25	0.306	18	26	8	0.692	2	14	12	0.143	28	66	38	0.424	7	35	0.729	0.159	19	8	10	2	19	21	5	7	4	10	0	3	5	10	5	12	2	5	0	2
2021-10-23	jiangsu	96	90	6	win	16	36	20	0.444	16	36	20	0.444	16	21	5	0.762	9	12	3	0.75	23	60	37	0.383	8	31	0.775	0.195	23	6	13	3	27	24	3	7	10	22	5	10	4	10	1	4	1	4	0	3
2018-10-24	xinjiang	116	95	21	win	35	60	25	0.583	10	27	17	0.37	16	22	6	0.727	7	14	7	0.5	36	71	35	0.507	11	37	0.804	0.262	21	7	11	5	19	17	14	20	8	19	2	4	4	13	1	2	4	7	3	7
2018-10-24	ningbo	81	120	-39	lose	29	67	38	0.433	3	22	19	0.136	14	22	8	0.636	10	41	31	0.244	18	44	26	0.409	10	25	0.694	0.182	12	8	8	2	13	19	5	8	8	22	3	5	9	21	0	4	5	15	2	5
2018-10-24	nanjing	95	116	-21	lose	32	67	35	0.478	6	24	18	0.25	13	15	2	0.867	4	14	10	0.286	32	75	43	0.427	9	31	0.738	0.196	9	4	13	2	17	19	5	13	5	11	4	11	11	27	0	2	4	7	4	15
2018-10-24	fujian	120	81	39	win	33	54	21	0.611	15	31	16	0.484	9	11	2	0.818	13	29	16	0.448	34	55	21	0.618	11	45	0.818	0.306	21	4	15	6	19	13	6	8	12	20	2	7	7	16	4	7	8	12	3	5
2020-10-24	zhejiang	116	106	10	win	32	61	29	0.525	8	17	9	0.471	28	30	2	0.933	9	17	8	0.529	27	57	30	0.474	15	22	0.733	0.417	23	10	13	5	24	25	7	11	8	17	2	5	12	28	1	2	1	1	1	1
2020-10-24	sichuan	106	116	-10	lose	28	45	17	0.622	10	21	11	0.476	20	27	7	0.741	9	19	10	0.474	24	42	18	0.571	8	21	0.583	0.267	22	8	20	1	25	24	7	8	6	16	1	3	8	11	2	3	1	4	0	0
2020-10-24	shanghai	99	102	-3	lose	24	46	22	0.522	11	29	18	0.379	18	23	5	0.783	3	10	7	0.3	29	62	33	0.468	13	25	0.781	0.31	16	6	12	3	20	24	4	5	7	19	3	8	9	17	4	5	0	4	2	5
2020-10-24	beijing	102	99	3	win	29	52	23	0.558	9	18	9	0.5	17	23	6	0.739	2	6	4	0.333	31	59	28	0.525	7	29	0.69	0.219	24	2	12	1	24	20	0	0	5	8	2	2	12	20	6	10	0	3	1	1
2021-10-24	sichuan	66	101	-35	lose	16	43	27	0.372	6	24	18	0.25	16	22	6	0.727	2	8	6	0.25	17	56	39	0.304	8	22	0.733	0.182	15	4	16	0	14	21	2	5	4	12	0	7	3	14	2	4	3	5	3	9
2021-10-24	shenzhen	100	93	7	win	29	59	30	0.492	9	25	16	0.36	15	22	7	0.682	4	12	8	0.333	30	68	38	0.441	20	26	0.667	0.435	23	7	18	6	15	20	9	21	4	11	5	17	4	9	2	5	0	1	2	3
2021-10-24	shanghai	97	112	-15	lose	19	47	28	0.404	14	30	16	0.467	17	27	10	0.63	6	12	6	0.5	25	63	38	0.397	6	26	0.722	0.143	24	7	14	6	27	24	5	12	10	15	2	8	2	9	0	3	1	7	3	7
2021-10-24	shandong	102	90	12	win	19	40	21	0.475	15	32	17	0.469	19	26	7	0.731	4	6	2	0.667	29	65	36	0.446	12	25	0.806	0.353	25	9	17	2	21	26	6	11	5	17	1	8	3	8	1	2	2	2	2	5
2021-10-24	ningbo	86	111	-25	lose	25	48	23	0.521	8	26	18	0.308	12	18	6	0.667	5	15	10	0.333	26	57	31	0.456	11	21	0.7	0.282	20	12	23	7	22	14	10	16	3	12	5	7	9	14	3	4	0	1	0	4
2021-10-24	nanjing	90	102	-12	lose	19	36	17	0.528	12	35	23	0.343	16	22	6	0.727	5	7	2	0.714	26	64	38	0.406	6	22	0.647	0.194	25	8	12	5	26	21	6	10	3	11	4	8	4	9	1	5	2	3	0	2
2021-10-24	jilin	111	86	25	win	36	60	24	0.6	9	16	7	0.563	12	22	10	0.545	1	5	4	0.2	40	67	27	0.597	9	28	0.718	0.3	27	14	20	3	14	22	12	17	6	9	3	9	8	14	2	3	3	9	0	1
2021-10-24	guangzhou	67	93	-26	lose	21	53	32	0.396	6	20	14	0.3	7	7	0	1	4	16	12	0.25	22	56	34	0.393	10	22	0.579	0.222	12	9	16	7	14	17	4	11	2	9	5	9	9	14	1	5	1	3	0	1
2021-10-24	guangsha	93	67	26	win	18	44	26	0.409	17	35	18	0.486	6	8	2	0.75	10	20	10	0.5	23	57	34	0.404	16	35	0.778	0.421	27	11	19	3	17	14	9	15	7	16	3	7	0	3	3	4	2	4	0	3
2021-10-24	guangdong	112	97	15	win	33	58	25	0.569	9	21	12	0.429	19	27	8	0.704	9	13	4	0.692	32	65	33	0.492	10	36	0.857	0.278	29	8	16	4	24	27	4	9	5	8	2	3	5	17	4	7	1	4	1	4
2021-10-24	fujian	93	100	-7	lose	24	51	27	0.471	11	26	15	0.423	12	16	4	0.75	0	2	2	0	35	75	40	0.467	13	26	0.565	0.333	22	8	20	4	20	15	4	12	8	14	7	18	5	11	0	2	0	1	4	4
2021-10-24	beijing	101	66	35	win	34	59	25	0.576	7	18	11	0.389	12	16	4	0.75	3	6	3	0.5	36	69	33	0.522	8	36	0.818	0.267	27	9	10	4	21	14	7	10	3	12	3	5	7	11	4	4	2	8	0	0
2020-10-25	tianjin	97	105	-8	lose	34	59	25	0.576	5	18	13	0.278	14	24	10	0.583	4	16	12	0.25	34	60	26	0.567	17	29	0.784	0.5	18	14	24	2	29	23	3	7	3	13	6	9	11	21	2	2	9	12	1	3
2020-10-25	shenzhen	88	99	-11	lose	20	36	16	0.556	10	34	24	0.294	18	21	3	0.857	8	28	20	0.286	21	41	20	0.512	10	31	0.738	0.278	22	7	19	1	18	21	6	10	7	20	0	5	5	11	3	10	2	4	0	0
2020-10-25	shandong	94	96	-2	lose	28	56	28	0.5	8	27	19	0.296	14	17	3	0.824	2	7	5	0.286	33	75	42	0.44	10	27	0.794	0.227	18	9	12	3	16	23	5	6	7	19	2	9	8	26	3	4	2	4	1	7
2020-10-25	liaoning	107	86	21	win	28	45	17	0.622	12	46	34	0.261	15	23	8	0.652	7	16	9	0.438	30	72	42	0.417	19	36	0.923	0.432	23	9	11	8	20	23	3	10	8	25	2	5	8	11	1	4	1	4	1	3
2020-10-25	jilin	105	97	8	win	27	45	18	0.6	11	28	17	0.393	18	25	7	0.72	12	29	17	0.414	23	41	18	0.561	8	17	0.5	0.216	24	15	17	0	23	29	7	13	9	22	4	5	9	18	4	6	4	5	1	4
2020-10-25	jiangsu	86	107	-21	lose	23	51	28	0.451	9	22	13	0.409	13	17	4	0.765	6	13	7	0.462	23	57	34	0.404	3	25	0.568	0.077	23	7	17	4	23	20	4	9	5	14	2	9	12	23	3	5	1	2	1	2
2020-10-25	guangzhou	96	94	2	win	22	42	20	0.524	13	27	14	0.481	13	15	2	0.867	3	4	1	0.75	32	65	33	0.492	7	34	0.773	0.206	19	6	22	2	23	16	0	2	8	18	2	5	7	15	0	0	2	6	2	4
2020-10-25	guangsha	99	88	11	win	33	62	29	0.532	9	26	17	0.346	6	9	3	0.667	9	24	15	0.375	31	62	31	0.5	11	26	0.722	0.262	26	11	11	2	21	18	12	17	6	16	2	7	7	14	0	3	1	6	1	2
2020-10-25	guangdong	123	111	12	win	34	51	17	0.667	12	28	16	0.429	19	24	5	0.792	9	21	12	0.429	32	53	21	0.604	11	32	0.78	0.344	19	15	27	3	26	22	18	26	6	15	3	3	6	10	1	2	2	7	0	1
2020-10-25	fujian	111	123	-12	lose	26	49	23	0.531	14	37	23	0.378	17	22	5	0.773	8	19	11	0.421	30	65	35	0.462	9	21	0.656	0.22	20	14	20	4	22	26	11	22	9	19	6	13	7	15	0	1	3	7	0	3
2021-10-25	zhejiang	128	89	39	win	40	60	20	0.667	11	28	17	0.393	15	20	5	0.75	1	4	3	0.25	46	80	34	0.575	17	35	0.761	0.5	32	9	18	5	25	25	14	20	5	16	2	3	9	13	2	5	0	1	0	3
2021-10-25	xinjiang	99	110	-11	lose	22	48	26	0.458	13	30	17	0.433	16	20	4	0.8	7	10	3	0.7	24	64	40	0.375	7	24	0.75	0.171	17	8	16	4	32	19	10	16	4	13	2	5	5	7	2	4	3	8	5	8
2021-10-25	tianjin	89	128	-39	lose	20	54	34	0.37	9	24	15	0.375	22	23	1	0.957	2	7	5	0.286	25	69	44	0.362	11	17	0.5	0.239	20	13	22	2	25	25	8	14	6	16	3	8	5	12	1	3	2	9	2	8
2021-10-25	shanxi	102	97	5	win	22	50	28	0.44	11	33	22	0.333	25	28	3	0.893	4	7	3	0.571	28	75	47	0.373	13	22	0.667	0.295	16	9	11	1	19	22	6	9	5	12	0	7	0	2	0	1	3	3	2	3
2021-10-25	liaoning	110	99	11	win	22	52	30	0.423	12	22	10	0.545	30	37	7	0.811	4	10	6	0.4	28	62	34	0.452	8	34	0.829	0.25	21	9	14	1	19	32	6	14	7	12	0	3	4	7	2	5	1	5	0	3
2021-10-25	beikong	97	102	-5	lose	25	44	19	0.568	12	32	20	0.375	11	15	4	0.733	8	12	4	0.667	29	64	35	0.453	11	31	0.705	0.333	18	8	21	1	22	19	2	7	7	18	2	5	6	7	1	7	4	8	5	7
2020-10-26	xinjiang	116	94	22	win	31	56	25	0.554	12	29	17	0.414	18	37	19	0.486	7	20	13	0.35	26	55	29	0.473	17	29	0.674	0.395	25	9	10	4	24	34	9	16	6	16	4	7	7	15	4	4	0	7	2	2
2020-10-26	qingdao	127	95	32	win	29	51	22	0.569	14	34	20	0.412	27	32	5	0.844	6	16	10	0.375	34	66	32	0.515	11	37	0.822	0.282	23	8	13	4	29	25	8	12	9	24	4	9	11	25	0	2	1	3	2	3
2020-10-26	nanjing	94	116	-22	lose	21	44	23	0.477	14	34	20	0.412	10	17	7	0.588	12	18	6	0.667	23	60	37	0.383	14	26	0.605	0.326	24	3	19	2	34	24	7	10	11	23	3	7	7	16	3	8	1	4	0	1
2020-10-26	beikong	95	127	-32	lose	23	50	27	0.46	7	30	23	0.233	28	37	9	0.757	7	26	19	0.269	18	49	31	0.367	8	28	0.718	0.178	19	9	14	3	25	29	8	13	5	12	2	7	5	18	2	12	2	6	1	1
2021-10-26	sichuan	108	111	-3	lose	26	56	30	0.464	16	34	18	0.471	8	10	2	0.8	2	7	5	0.286	37	80	43	0.463	11	28	0.609	0.229	24	5	8	2	20	13	5	15	8	18	6	11	4	9	1	3	7	13	0	0
2021-10-26	shenzhen	102	92	10	win	33	60	27	0.55	6	24	18	0.25	18	21	3	0.857	4	13	9	0.308	33	69	36	0.478	12	29	0.659	0.3	25	11	10	2	16	23	6	14	6	17	9	15	8	13	1	2	1	1	2	7
2021-10-26	shanghai	117	93	24	win	37	65	28	0.569	6	10	4	0.6	25	32	7	0.781	2	2	0	1	39	71	32	0.549	18	27	0.711	0.563	23	13	25	2	22	25	8	16	6	8	6	10	3	5	3	3	5	7	2	6
2021-10-26	shandong	93	87	6	win	30	59	29	0.508	8	23	15	0.348	9	14	5	0.643	1	3	2	0.333	37	79	42	0.468	18	30	0.652	0.429	21	5	16	3	14	12	7	12	6	17	3	10	7	15	1	4	0	5	0	4
2021-10-26	qingdao	92	102	-10	lose	28	49	21	0.571	8	31	23	0.258	12	19	7	0.632	2	8	6	0.25	30	68	38	0.441	15	28	0.7	0.341	20	8	19	3	23	16	5	9	5	14	1	6	3	6	2	4	4	7	0	5
2021-10-26	nanjing	88	100	-12	lose	20	47	27	0.426	12	39	27	0.308	12	16	4	0.75	2	5	3	0.4	26	77	51	0.338	12	23	0.622	0.279	24	12	15	6	24	23	5	10	10	25	3	6	1	7	1	6	2	5	0	0
2021-10-26	jilin	87	93	-6	lose	28	57	29	0.491	7	28	21	0.25	10	13	3	0.769	2	8	6	0.25	31	75	44	0.413	16	24	0.571	0.348	25	12	11	8	12	14	7	10	5	12	0	4	6	15	2	7	1	4	3	9
2021-10-26	guangzhou	100	88	12	win	25	46	21	0.543	10	27	17	0.37	20	28	8	0.714	3	6	3	0.5	30	65	35	0.462	14	31	0.721	0.378	21	9	17	5	23	24	6	8	5	17	1	3	4	5	2	6	8	12	0	0
2021-10-26	guangdong	111	108	3	win	29	57	28	0.509	12	32	20	0.375	17	24	7	0.708	4	9	5	0.444	35	78	43	0.449	18	37	0.771	0.391	15	5	10	5	13	20	6	9	6	13	0	6	6	20	1	4	3	6	0	0
2021-10-26	fujian	93	117	-24	lose	27	52	25	0.519	9	23	14	0.391	12	22	10	0.545	2	6	4	0.333	33	68	35	0.485	11	14	0.438	0.289	24	10	22	2	25	22	4	9	8	16	2	10	0	4	1	3	1	3	1	4
2018-10-27	shenzhen	103	92	11	win	26	36	10	0.722	11	34	23	0.324	18	30	12	0.6	4	8	4	0.5	33	62	29	0.532	11	28	0.583	0.333	23	4	8	5	19	22	8	15	11	20	4	5	7	18	1	1	0	2	2	5
2018-10-27	shanghai	109	102	7	win	40	64	24	0.625	3	22	19	0.136	20	28	8	0.714	5	19	14	0.263	32	61	29	0.525	14	27	0.6	0.326	28	9	9	1	24	23	9	18	5	13	3	4	10	19	1	3	2	8	4	7
2018-10-27	qingdao	92	103	-11	lose	30	58	28	0.517	8	29	21	0.276	8	18	10	0.444	4	9	5	0.444	31	75	44	0.413	20	22	0.667	0.417	16	4	7	0	22	19	3	8	7	17	7	13	12	34	3	6	3	3	1	5
2018-10-27	jilin	102	109	-7	lose	31	57	26	0.544	8	26	18	0.308	16	21	5	0.762	5	17	12	0.294	33	65	32	0.508	18	29	0.674	0.4	13	5	14	5	23	24	4	7	4	15	2	4	11	23	0	1	3	6	4	14
2020-10-27	zhejiang	113	104	9	win	25	43	18	0.581	12	38	26	0.316	27	39	12	0.692	9	32	23	0.281	23	44	21	0.523	14	24	0.686	0.368	13	9	16	3	32	33	7	10	4	18	4	8	13	21	2	9	0	0	2	3
2020-10-27	sichuan	90	111	-21	lose	23	53	30	0.434	8	24	16	0.333	20	34	14	0.588	7	19	12	0.368	20	54	34	0.37	13	27	0.692	0.277	22	7	24	5	19	32	7	14	7	20	1	5	3	10	0	0	4	11	0	0
2020-10-27	shenzhen	96	87	9	win	25	53	28	0.472	12	25	13	0.48	10	14	4	0.714	3	7	4	0.429	33	70	37	0.471	9	26	0.684	0.25	15	11	14	3	22	18	4	6	3	12	4	8	10	20	2	7	3	5	4	6
2020-10-27	shanxi	87	96	-9	lose	24	51	27	0.471	10	26	16	0.385	9	16	7	0.563	2	4	2	0.5	30	71	41	0.423	12	27	0.75	0.316	18	8	19	3	18	22	7	11	5	11	2	12	9	20	2	3	4	4	1	5
2020-10-27	shanghai	116	87	29	win	23	34	11	0.676	21	46	25	0.457	7	8	1	0.875	7	15	8	0.467	37	65	28	0.569	14	35	0.761	0.4	29	7	11	4	19	14	4	8	15	29	2	7	9	14	1	1	0	0	5	7
2020-10-27	guangsha	104	113	-9	lose	31	54	23	0.574	4	20	16	0.2	30	43	13	0.698	5	18	13	0.278	28	54	26	0.519	11	24	0.632	0.314	18	7	17	6	33	32	6	10	5	16	1	5	12	21	0	2	3	5	4	6
2020-10-27	guangdong	111	90	21	win	35	59	24	0.593	10	29	19	0.345	11	18	7	0.611	11	23	12	0.478	32	63	31	0.508	12	34	0.723	0.308	23	13	20	2	32	19	14	26	8	15	5	8	13	23	4	6	0	0	1	3
2020-10-27	fujian	87	116	-29	lose	28	55	27	0.509	6	26	20	0.231	13	18	5	0.722	1	4	3	0.25	30	74	44	0.405	11	21	0.6	0.239	18	6	11	1	14	19	6	10	4	16	5	10	10	16	0	4	2	3	1	3
2021-10-27	ningbo	75	121	-46	lose	23	54	31	0.426	8	16	8	0.5	5	7	2	0.714	1	2	1	0.5	29	67	38	0.433	9	19	0.731	0.29	22	8	22	3	13	14	5	9	8	17	2	6	2	4	2	4	1	2	1	10
2021-10-27	jiangsu	69	86	-17	lose	23	44	21	0.523	4	19	15	0.211	11	13	2	0.846	2	10	8	0.2	24	52	28	0.462	4	25	0.694	0.133	19	7	14	2	22	18	4	7	4	14	5	12	5	14	0	4	4	7	1	1
2021-10-27	guangsha	121	75	46	win	39	55	16	0.709	10	21	11	0.476	13	16	3	0.813	4	7	3	0.571	41	65	24	0.631	7	22	0.71	0.269	29	16	12	4	14	13	9	11	8	16	3	7	5	8	2	2	6	13	3	4
2021-10-27	beijing	86	69	17	win	22	46	24	0.478	8	25	17	0.32	18	25	7	0.72	2	6	4	0.333	24	61	37	0.393	11	26	0.867	0.306	25	7	10	5	18	22	2	4	8	24	8	16	2	8	1	4	2	5	1	1
2018-10-28	xinjiang	95	112	-17	lose	21	49	28	0.429	11	34	23	0.324	20	25	5	0.8	4	15	11	0.267	26	66	40	0.394	8	34	0.694	0.167	16	5	12	4	26	24	11	18	6	21	3	5	7	14	0	1	2	7	1	4
2018-10-28	jiangsu	85	110	-25	lose	26	46	20	0.565	7	29	22	0.241	12	18	6	0.667	7	28	21	0.25	22	43	21	0.512	10	30	0.811	0.227	20	6	20	3	27	20	3	6	2	16	1	2	3	10	3	7	5	9	1	3
2018-10-28	guangsha	110	85	25	win	30	51	21	0.588	10	27	17	0.37	20	23	3	0.87	11	27	16	0.407	26	48	22	0.542	7	34	0.773	0.189	32	18	11	2	20	27	10	11	8	19	2	4	5	10	2	5	2	8	1	5
2018-10-28	guangdong	112	95	17	win	28	57	29	0.491	10	31	21	0.323	26	36	10	0.722	6	19	13	0.316	28	65	37	0.431	15	40	0.833	0.306	22	5	10	5	24	25	9	22	7	16	3	7	9	13	0	1	1	2	2	3
2020-10-28	xinjiang	99	97	2	win	29	55	26	0.527	10	23	13	0.435	11	23	12	0.478	6	14	8	0.429	29	60	31	0.483	18	28	0.636	0.462	24	4	18	8	20	25	8	12	8	17	1	7	6	15	3	7	0	6	1	1
2020-10-28	tianjin	91	119	-28	lose	23	54	31	0.426	6	26	20	0.231	27	39	12	0.692	0	7	7	0	25	69	44	0.362	16	28	0.8	0.327	15	11	20	5	24	31	3	8	4	16	3	8	6	14	0	3	5	10	2	4
2020-10-28	shandong	97	99	-2	lose	24	52	28	0.462	12	27	15	0.444	13	22	9	0.591	4	8	4	0.5	29	68	39	0.426	16	21	0.538	0.364	24	11	15	6	25	20	6	10	7	16	2	10	2	18	3	4	1	3	0	2
2020-10-28	qingdao	113	114	-1	lose	24	48	24	0.5	15	32	17	0.469	20	31	11	0.645	7	16	9	0.438	31	63	32	0.492	13	25	0.806	0.351	22	7	14	3	27	30	6	8	6	15	3	10	7	19	5	8	2	4	5	12
2020-10-28	nanjing	82	110	-28	lose	22	48	26	0.458	5	27	22	0.185	23	29	6	0.793	0	9	9	0	23	62	39	0.371	17	19	0.559	0.436	16	6	20	2	29	28	3	5	2	21	7	12	7	18	2	4	2	4	0	3
2020-10-28	liaoning	119	91	28	win	30	51	21	0.588	13	32	19	0.406	20	28	8	0.714	5	15	10	0.333	35	65	30	0.538	7	33	0.673	0.2	27	14	13	10	31	24	10	13	7	18	3	5	10	17	5	7	1	4	3	7
2020-10-28	jilin	99	87	12	win	17	35	18	0.486	15	40	25	0.375	20	26	6	0.769	8	19	11	0.421	21	53	32	0.396	7	34	0.791	0.206	22	5	14	5	20	23	5	7	10	23	0	3	3	11	2	12	2	3	3	5
2020-10-28	jiangsu	114	113	1	win	27	43	16	0.628	15	32	17	0.469	15	21	6	0.714	14	27	13	0.519	24	44	20	0.545	6	24	0.649	0.194	30	6	17	1	30	27	5	7	11	23	1	7	8	15	5	5	2	2	1	5
2020-10-28	guangzhou	87	99	-12	lose	29	52	23	0.558	6	32	26	0.188	11	12	1	0.917	1	9	8	0.111	30	71	41	0.423	9	27	0.794	0.209	17	6	10	3	23	20	4	8	3	16	2	4	10	22	1	4	4	5	3	10
2020-10-28	beikong	110	82	28	win	29	51	22	0.569	7	22	15	0.318	31	38	7	0.816	7	15	8	0.467	26	55	29	0.473	15	22	0.564	0.441	21	10	12	4	28	29	4	8	7	19	4	6	8	21	4	7	4	5	1	4
2021-10-28	zhejiang	100	90	10	win	20	44	24	0.455	8	29	21	0.276	36	47	11	0.766	4	8	4	0.5	22	63	41	0.349	9	30	0.714	0.225	13	7	15	8	29	32	8	14	3	14	2	5	3	8	1	6	1	1	1	1
2021-10-28	xinjiang	101	93	8	win	25	64	39	0.391	13	33	20	0.394	12	19	7	0.632	4	8	4	0.5	29	84	55	0.345	16	38	0.731	0.314	25	13	17	0	23	23	13	24	8	24	1	7	2	6	0	0	2	2	1	4
2021-10-28	tianjin	94	96	-2	lose	19	40	21	0.475	14	40	26	0.35	14	15	1	0.933	4	12	8	0.333	29	68	39	0.426	10	24	0.706	0.256	19	12	13	6	14	18	8	11	8	19	1	5	2	6	5	11	1	8	1	4
2021-10-28	sichuan	96	94	2	win	28	42	14	0.667	9	29	20	0.31	13	18	5	0.722	2	7	5	0.286	34	63	29	0.54	10	29	0.744	0.294	20	7	19	0	18	14	4	5	10	20	2	7	7	12	1	4	4	6	0	3
2021-10-28	shenzhen	90	106	-16	lose	26	57	31	0.456	7	34	27	0.206	17	22	5	0.773	4	16	12	0.25	28	74	46	0.378	17	23	0.657	0.347	21	12	12	2	27	21	8	22	6	17	4	13	5	9	0	4	1	2	1	7
2021-10-28	shanxi	93	101	-8	lose	22	49	27	0.449	9	37	28	0.243	22	24	2	0.917	3	7	4	0.429	26	77	51	0.338	14	35	0.686	0.269	21	10	16	3	23	23	7	27	6	16	1	5	0	1	0	0	0	2	2	4
2021-10-28	shandong	95	105	-10	lose	21	48	27	0.438	12	31	19	0.387	17	25	8	0.68	1	7	6	0.143	29	69	40	0.42	13	21	0.808	0.295	20	8	13	2	21	25	4	11	6	18	2	4	3	6	4	7	1	4	3	5
2021-10-28	nanjing	103	114	-11	lose	23	46	23	0.5	14	35	21	0.4	15	20	5	0.75	7	18	11	0.389	29	62	33	0.468	12	21	0.677	0.286	28	12	10	2	27	20	9	18	7	19	0	4	1	4	2	5	1	2	1	3
2021-10-28	liaoning	114	103	11	win	26	38	12	0.684	11	32	21	0.344	29	35	6	0.829	7	16	9	0.438	27	51	24	0.529	10	30	0.714	0.323	24	4	18	3	20	27	4	8	6	18	2	4	9	11	1	2	1	1	1	3
2021-10-28	guangdong	106	90	16	win	28	52	24	0.538	8	24	16	0.333	26	31	5	0.839	1	1	0	1	31	71	40	0.437	12	32	0.653	0.343	18	6	17	5	21	27	5	6	6	20	1	6	6	14	1	2	4	9	4	5
2021-10-28	fujian	90	100	-10	lose	28	62	34	0.452	5	18	13	0.278	19	32	13	0.594	0	2	2	0	30	75	45	0.4	12	31	0.775	0.286	24	8	16	8	32	29	7	14	4	9	3	9	2	13	4	6	2	3	0	1
2021-10-28	beikong	105	95	10	win	24	45	21	0.533	14	23	9	0.609	15	19	4	0.789	8	15	7	0.533	28	51	23	0.549	5	31	0.705	0.192	22	5	17	4	25	21	1	4	5	9	4	5	8	14	4	5	6	10	0	3
2020-10-29	shanxi	113	103	10	win	30	55	25	0.545	12	29	17	0.414	17	22	5	0.773	4	8	4	0.5	35	73	38	0.479	13	28	0.737	0.333	24	9	13	2	21	22	10	14	9	21	1	4	4	16	3	6	1	4	4	13
2020-10-29	shanghai	105	119	-14	lose	28	57	29	0.491	11	25	14	0.44	16	23	7	0.696	9	16	7	0.563	25	61	36	0.41	11	21	0.7	0.297	20	11	13	1	23	28	9	12	7	13	3	6	9	17	0	2	1	5	2	12
2020-10-29	guangsha	103	113	-10	lose	29	60	31	0.483	9	22	13	0.409	18	20	2	0.9	1	4	3	0.25	33	74	41	0.446	10	26	0.667	0.263	27	6	13	5	22	21	10	16	7	17	3	9	7	18	4	5	5	12	1	3
2020-10-29	guangdong	119	105	14	win	35	54	19	0.648	11	24	13	0.458	16	21	5	0.762	5	14	9	0.357	36	59	23	0.61	9	26	0.703	0.3	22	5	17	7	28	23	9	11	3	9	0	2	10	22	2	5	2	4	1	1
2020-10-29	fujian	71	80	-9	lose	19	43	24	0.442	8	17	9	0.471	9	13	4	0.692	2	4	2	0.5	23	54	31	0.426	5	28	0.737	0.156	17	8	22	3	26	21	3	3	3	9	3	11	8	23	6	7	1	2	3	8
2020-10-29	beijing	80	71	9	win	25	46	21	0.543	5	27	22	0.185	15	21	6	0.714	3	14	11	0.214	26	58	32	0.448	10	27	0.844	0.263	20	14	13	2	21	26	7	8	7	21	1	6	7	17	0	2	1	3	2	3
2021-10-29	shanghai	109	94	15	win	24	46	22	0.522	13	32	19	0.406	22	28	6	0.786	4	12	8	0.333	31	64	33	0.484	14	29	0.829	0.368	28	8	14	6	21	28	5	11	9	22	6	11	6	8	2	4	1	2	0	0
2021-10-29	qingdao	78	89	-11	lose	21	49	28	0.429	8	21	13	0.381	12	22	10	0.545	6	12	6	0.5	20	55	35	0.364	11	21	0.525	0.268	18	8	16	3	23	23	7	11	4	8	0	8	3	12	3	3	1	3	3	7
2021-10-29	ningbo	70	93	-23	lose	20	42	22	0.476	6	26	20	0.231	12	16	4	0.75	3	8	5	0.375	21	58	37	0.362	8	22	0.629	0.19	17	9	22	3	22	19	7	13	8	19	3	5	1	9	0	2	2	2	1	10
2021-10-29	jilin	92	102	-10	lose	30	55	25	0.545	4	13	9	0.308	20	24	4	0.833	3	5	2	0.6	28	60	32	0.467	8	20	0.541	0.276	17	8	13	5	17	27	5	8	3	8	2	5	10	20	2	5	3	7	1	1
2021-10-29	jiangsu	94	109	-15	lose	22	48	26	0.458	13	30	17	0.433	11	12	1	0.917	6	14	8	0.429	29	64	35	0.453	6	24	0.632	0.171	24	9	16	5	28	21	8	11	6	10	1	3	6	14	3	9	2	3	1	2
2021-10-29	guangzhou	93	70	23	win	21	40	19	0.525	13	33	20	0.394	12	20	8	0.6	7	10	3	0.7	25	61	36	0.41	13	34	0.81	0.371	22	16	23	3	19	22	7	11	4	13	4	7	4	7	2	5	3	5	1	6
2021-10-29	guangsha	102	92	10	win	31	49	18	0.633	7	28	21	0.25	19	22	3	0.864	1	7	6	0.143	35	68	33	0.515	17	21	0.724	0.459	26	8	13	5	27	17	7	9	3	17	3	6	7	11	2	3	4	5	2	3
2021-10-29	beijing	89	78	11	win	30	59	29	0.508	4	16	12	0.25	17	23	6	0.739	2	11	9	0.182	31	63	32	0.492	19	30	0.732	0.475	19	9	16	6	23	23	5	9	1	12	2	7	5	10	3	7	2	5	0	1
2018-10-30	shandong	96	120	-24	lose	28	54	26	0.519	8	31	23	0.258	16	22	6	0.727	8	25	17	0.32	25	57	32	0.439	13	21	0.553	0.295	20	9	13	4	24	26	1	4	7	21	2	3	5	13	1	2	6	16	1	5
2018-10-30	guangdong	120	96	24	win	21	50	29	0.42	22	33	11	0.667	12	19	7	0.632	20	30	10	0.667	23	53	30	0.434	17	31	0.705	0.447	30	6	18	2	26	24	12	19	8	15	1	6	5	8	1	2	3	6	3	3
2020-10-30	zhejiang	91	74	17	win	23	50	27	0.46	9	27	18	0.333	18	26	8	0.692	3	9	6	0.333	25	64	39	0.391	19	24	0.632	0.463	17	5	14	0	26	28	2	5	7	15	4	7	7	22	1	4	0	0	0	5
2020-10-30	xinjiang	113	100	13	win	26	52	26	0.5	9	26	17	0.346	34	41	7	0.829	5	13	8	0.385	25	60	35	0.417	13	33	0.868	0.342	23	9	21	6	32	31	4	10	9	22	3	5	8	16	0	2	2	5	1	6
2020-10-30	tianjin	95	108	-13	lose	23	53	30	0.434	10	26	16	0.385	19	29	10	0.655	9	20	11	0.45	22	57	35	0.386	14	30	0.714	0.298	18	8	19	2	22	23	6	17	5	11	4	9	6	18	4	5	4	11	0	1
2020-10-30	shenzhen	74	91	-17	lose	22	47	25	0.468	4	21	17	0.19	18	22	4	0.818	5	13	8	0.385	20	54	34	0.37	14	22	0.537	0.368	17	4	14	4	28	26	0	2	4	15	1	6	7	18	3	7	1	4	1	2
2020-10-30	shandong	91	103	-12	lose	24	57	33	0.421	8	26	18	0.308	19	28	9	0.679	3	8	5	0.375	28	74	46	0.378	15	30	0.714	0.3	17	14	19	5	19	24	7	9	3	16	3	10	9	27	2	2	2	2	1	6
2020-10-30	qingdao	103	91	12	win	32	59	27	0.542	7	24	17	0.292	18	26	8	0.692	1	4	3	0.25	36	77	41	0.468	12	35	0.7	0.286	13	14	22	3	24	19	10	21	4	12	3	9	10	22	0	2	2	4	5	7
2020-10-30	nanjing	99	125	-26	lose	22	49	27	0.449	15	32	17	0.469	10	13	3	0.769	5	14	9	0.357	31	66	35	0.47	8	24	0.686	0.19	27	9	15	2	27	16	6	11	9	24	2	6	5	11	3	3	4	8	1	3
2020-10-30	liaoning	125	99	26	win	29	48	19	0.604	14	31	17	0.452	25	33	8	0.758	7	15	8	0.467	31	59	28	0.525	11	34	0.81	0.314	24	13	17	6	16	27	8	12	10	19	1	5	7	11	1	2	0	1	1	1
2020-10-30	jilin	99	81	18	win	28	52	24	0.538	10	32	22	0.313	13	20	7	0.65	5	13	8	0.385	32	70	38	0.457	17	27	0.771	0.362	19	10	12	5	18	21	5	6	6	20	2	10	8	22	2	7	1	4	2	7
2020-10-30	jiangsu	100	113	-13	lose	24	50	26	0.48	10	26	16	0.385	22	39	17	0.564	2	9	7	0.222	30	65	35	0.462	5	25	0.658	0.132	24	8	15	4	31	32	6	10	6	13	4	8	6	19	2	7	2	5	1	4
2020-10-30	guangzhou	108	95	13	win	24	56	32	0.429	14	29	15	0.483	18	24	6	0.75	10	22	12	0.455	26	61	35	0.426	12	33	0.702	0.286	30	9	13	4	23	22	10	14	7	16	3	4	9	27	0	2	2	6	3	4
2020-10-30	beikong	81	99	-18	lose	26	47	21	0.553	6	22	16	0.273	11	18	7	0.611	4	9	5	0.444	26	58	32	0.448	8	30	0.638	0.229	11	6	19	6	21	18	9	12	2	7	3	7	10	21	4	10	1	2	3	4
2021-10-30	zhejiang	124	101	23	win	26	53	27	0.491	13	36	23	0.361	33	36	3	0.917	4	13	9	0.308	30	71	41	0.423	15	36	0.766	0.366	28	10	17	3	35	30	11	17	6	14	1	12	3	10	3	5	0	1	3	9
2021-10-30	xinjiang	96	106	-10	lose	30	58	28	0.517	8	22	14	0.364	12	15	3	0.8	1	7	6	0.143	35	71	36	0.493	13	19	0.633	0.317	18	13	18	4	21	15	7	17	4	9	1	3	4	10	3	5	3	7	0	3
2021-10-30	tianjin	106	87	19	win	25	42	17	0.595	14	34	20	0.412	14	19	5	0.737	4	11	7	0.364	33	63	30	0.524	13	22	0.667	0.361	24	16	19	8	18	24	14	16	7	18	2	7	2	5	1	3	2	3	3	6
2021-10-30	shandong	106	96	10	win	31	45	14	0.689	7	24	17	0.292	23	30	7	0.767	1	4	3	0.25	35	63	28	0.556	11	28	0.683	0.367	26	9	20	1	15	21	5	8	4	13	4	6	3	7	1	2	1	4	0	4
[truncated: 1,250 more rows]
[truncated: 8 more columns]
